# Supplementary material for: Temporal kinetics of serum amyloid A (SAA) concentration and identification of SAA isoforms in blood and synovial fluid of horses with experimentally induced septic arthritis, non-septic synovitis, and systemic inflammation
Source: PubMed Central journal article supplement — J Vet Diagn Invest. 2024 Dec 17;37(1):42–54. doi: 10.1177/10406387241299873 (PMC11653388; doi:10.1177/10406387241299873), 2024-12-17
Supplement: sj-pdf-1-vdi-10.1177_10406387241299873.pdf [file sj-pdf-1-vdi-10.1177_10406387241299873.pdf]

Koziy RV, et al. Temporal kinetics of serum amyloid A (SAA) concentration and identification of SAA isoforms in blood and synovial fluid of horses with experimentally induced septic arthritis, non-septic synovitis, and systemic inflammation

**Supplemental Table 1.** Synovial fluid cytologic parameters at post-induction hour 24.

|                              | NCC, × 10 <sup>9</sup> cells/L | TP, g/L | PN   |
|------------------------------|--------------------------------|---------|------|
| <b>Septic arthritis</b>      |                                |         |      |
| Horse 1                      | 276.4                          | 55      | 96   |
| Horse 2                      | 304                            | 71      | 94   |
| Horse 3                      | 238.3                          | 75      | 95   |
| Horse 4                      | 198.4                          | 65      | 95   |
| Horse 5                      | 236                            | 58      | 95   |
| Mean                         | 250.6                          | 64.8    | 95   |
| Median                       | 238.3                          | 65      | 95   |
| SD                           | 40.6                           | 8.4     | 0.7  |
| <b>Non-septic synovitis</b>  |                                |         |      |
| Horse 1                      | 41.8                           | 48      | 80   |
| Horse 2                      | 100                            | 60      | 88   |
| Horse 3                      | 123.4                          | 64      | 90   |
| Horse 4                      | 108                            | 60      | 90   |
| Horse 5                      | 125.8                          | 56      | 90   |
| Mean                         | 99.8                           | 57.6    | 87.6 |
| Median                       | 108                            | 60      | 90   |
| SD                           | 34.1                           | 6.1     | 4.3  |
| <b>Systemic inflammation</b> |                                |         |      |
| Horse 1                      | 0.5                            | 40      | 9    |
| Horse 2                      | 24                             | 42      | 84   |
| Horse 3                      | 21.7                           | 61      | 90   |
| Horse 4                      | 0.2                            | 36      | 68   |
| Horse 5                      | 0.2                            | 38      | 66   |
| Mean                         | 9.32                           | 43.4    | 63.4 |
| Median                       | 0.5                            | 40      | 68   |
| SD                           | 12.4                           | 10.1    | 32.1 |

NCC = total nucleated cell count; PN = percentage of neutrophils; TP = total protein.

**Supplemental Table 2.** Leukocyte and segmented neutrophils counts in blood at post-induction hour (PIH) 24 and PIH48.

|                       | Leukocyte,<br>× 10 <sup>9</sup> cells/L |       | Segmented neutrophils,<br>× 10 <sup>9</sup> cells/L |       |
|-----------------------|-----------------------------------------|-------|-----------------------------------------------------|-------|
|                       | PIH24                                   | PIH48 | PIH24                                               | PIH48 |
| Septic arthritis      |                                         |       |                                                     |       |
| Horse 1               | 12.7                                    | NA    | 8.5                                                 | NA    |
| Horse 2               | 14.2                                    | 12.8  | 12.2                                                | 10    |
| Horse 3               | 20.7                                    | 16.2  | 16.6                                                | 14.4  |
| Horse 4               | 14.9                                    | 13.9  | 12.2                                                | 13.2  |
| Horse 5               | 15.5                                    | 13.7  | 12.9                                                | 11.5  |
| Mean                  | 15.6                                    | 14.2  | 12.5                                                | 12.3  |
| Median                | 14.9                                    | 13.8  | 12.2                                                | 12.4  |
| SD                    | 3                                       | 1.4   | 2.9                                                 | 1.9   |
| Non-septic synovitis  |                                         |       |                                                     |       |
| Horse 1               | 9.5                                     | 7.6   | 7.6                                                 | 4.9   |
| Horse 2               | 9.7                                     | 9     | 8.3                                                 | 7.6   |
| Horse 3               | 10.7                                    | 9.1   | 8.4                                                 | 7.4   |
| Horse 4               | 9.5                                     | 10.5  | 7.9                                                 | 8     |
| Horse 5               | 9.7                                     | 11.9  | 6.4                                                 | 7.5   |
| Mean                  | 9.8                                     | 9.6   | 7.7                                                 | 7.1   |
| Median                | 9.7                                     | 9.1   | 7.9                                                 | 7.5   |
| SD                    | 0.5                                     | 1.6   | 0.8                                                 | 1.2   |
| Systemic inflammation |                                         |       |                                                     |       |
| Horse 1               | 9.4                                     | 12.5  | 6.6                                                 | 9.6   |
| Horse 2               | 10                                      | 10    | 8.8                                                 | 7.2   |
| Horse 3               | 9.3                                     | 12.6  | 6.9                                                 | 10.2  |
| Horse 4               | 16.2                                    | 19.4  | 12                                                  | 15.7  |
| Horse 5               | 9.3                                     | 12.6  | 6.9                                                 | 10.2  |
| Mean                  | 10.8                                    | 13.4  | 8.2                                                 | 10.6  |
| Median                | 9.4                                     | 12.6  | 6.9                                                 | 10.2  |
| SD                    | 3                                       | 3.5   | 2.3                                                 | 3.1   |

NA = data not available.
