# Supplementary material for: Temporal kinetics of serum amyloid A (SAA) concentration and identification of SAA isoforms in blood and synovial fluid of horses with experimentally induced septic arthritis, non-septic synovitis, and systemic inflammation
Source: PubMed Central journal article supplement — J Vet Diagn Invest. 2024 Dec 17;37(1):42–54. doi: 10.1177/10406387241299873 (PMC11653388; doi:10.1177/10406387241299873), 2024-12-17
Supplement: sj-pdf-2-vdi-10.1177_10406387241299873.pdf [file sj-pdf-2-vdi-10.1177_10406387241299873.pdf]

**Supplemental Table 3. Summary of data generated by liquid chromatography-t**

| number | filename   | parent_cha | score | percent_sc | totalIntens | previous_a |
|--------|------------|------------|-------|------------|-------------|------------|
| 2140   | L5P_ZT.375 | 2          | 5.36  | 66.1       | 4.76E+05    | (K)        |
| 1305   | X1P_ZT.349 | 6          | 7.3   | 64.7       | 7.81E+04    | (F)        |
| 1099   | S2P_ZT_Ro  | 2          | 8.03  | 68         | 1.19E+05    | (L)        |
| 2016   | L1P_ZT.489 | 4          | 5.6   | 67.3       | 1.99E+06    | (V)        |
| 19     | S5P_ZT_Ro  | 2          | 19.52 | 88.2       | 1.88E+08    | (K)        |
| 30     | L3P_ZT.117 | 2          | 18.85 | 86.3       | 6.29E+07    | (K)        |
| 37     | S4P_ZT_Ro  | 2          | 18.03 | 88.2       | 1.54E+08    | (K)        |
| 45     | S2P_ZT_Ro  | 2          | 17.67 | 88.6       | 1.25E+08    | (K)        |
| 46     | S1P_ZT_Ro  | 2          | 17.67 | 88.5       | 1.46E+08    | (K)        |
| 55     | X4P_ZT.111 | 2          | 17.12 | 86.6       | 5.63E+07    | (K)        |
| 56     | S3P_ZT_Ro  | 2          | 17.07 | 86.5       | 1.01E+08    | (K)        |
| 60     | L3P_ZT.119 | 2          | 16.91 | 85.9       | 1.20E+08    | (K)        |
| 74     | X2P_ZT.118 | 2          | 16.25 | 80         | 3.09E+06    | (K)        |
| 93     | X3P_ZT.114 | 2          | 15.63 | 84.4       | 1.04E+08    | (K)        |
| 96     | S4P_ZT_Ro  | 2          | 15.58 | 81.3       | 8.01E+07    | (K)        |
| 102    | L3P_ZT.129 | 2          | 15.45 | 100        | 4.84E+07    | (K)        |
| 106    | L1P_ZT.112 | 2          | 15.39 | 82.2       | 4.33E+06    | (K)        |
| 133    | S5P_ZT_Ro  | 2          | 14.89 | 81.6       | 9.61E+07    | (K)        |
| 151    | S3P_ZT_Ro  | 2          | 14.62 | 79         | 2.05E+06    | (K)        |
| 163    | X2P_ZT.116 | 2          | 14.45 | 78.1       | 3.09E+06    | (K)        |
| 199    | X3P_ZT.113 | 2          | 13.94 | 78.8       | 5.43E+07    | (K)        |
| 219    | X4P_ZT.110 | 2          | 13.68 | 77.6       | 3.19E+07    | (K)        |
| 225    | X1P_ZT.121 | 2          | 13.6  | 91.1       | 2.56E+06    | (K)        |
| 293    | X5P_ZT.113 | 2          | 12.7  | 89         | 2.57E+06    | (K)        |
| 331    | S4P_ZT_Ro  | 2          | 12.42 | 67.2       | 2.27E+06    | (K)        |
| 351    | X4P_ZT.120 | 2          | 12.24 | 68         | 3.19E+07    | (K)        |
| 379    | S5P_ZT_Ro  | 2          | 11.89 | 75.8       | 9.61E+07    | (K)        |
| 404    | L4P_ZT.128 | 2          | 11.78 | 77.3       | 8.68E+05    | (K)        |
| 644    | L2P_ZT.111 | 2          | 10.02 | 84.8       | 5.49E+05    | (K)        |
| 657    | X1P_ZT.119 | 2          | 9.96  | 68.5       | 2.56E+06    | (K)        |
| 865    | L3P_ZT.128 | 2          | 8.93  | 63.7       | 6.14E+07    | (K)        |
| 881    | S5P_ZT_Ro  | 2          | 8.86  | 74         | 1.88E+08    | (K)        |
| 1036   | X1P_ZT.120 | 2          | 8.26  | 76.7       | 2.56E+06    | (K)        |
| 699    | L3P_ZT.334 | 3          | 9.75  | 68.4       | 2.79E+05    | (K)        |
| 731    | X2P_ZT.344 | 3          | 9.58  | 80.5       | 8.08E+04    | (K)        |
| 1841   | S5P_ZT_Ro  | 3          | 5.94  | 80.6       | 1.44E+05    | (K)        |
| 1440   | L4P_ZT.277 | 4          | 6.89  | 79.1       | 5.24E+05    | (K)        |
| 2215   | S4P_ZT_Ro  | 4          | 5.23  | 66.7       | 1.27E+06    | (R)        |
| 1684   | X1P_ZT.414 | 3          | 6.31  | 69.6       | 9.89E+05    | (R)        |
| 2062   | X2P_ZT.450 | 3          | 5.5   | 100        | 7.38E+05    | (R)        |
| 2316   | X2P_ZT.448 | 3          | 5.03  | 61         | 7.38E+05    | (R)        |
| 2149   | L3P_ZT.521 | 2          | 5.34  | 61.2       | 2.51E+04    | (K)        |
| 1243   | L2P_ZT.472 | 3          | 7.51  | 71.5       | 8.62E+04    | (E)        |
| 1500   | L1P_ZT.482 | 3          | 6.75  | 88.5       | 9.54E+04    | (E)        |
| 1692   | L5P_ZT.497 | 6          | 6.3   | 72.9       | 7.30E+04    | (K)        |

|                 |   |       |      |              |
|-----------------|---|-------|------|--------------|
| 1656 X3P_ZT.16: | 2 | 6.39  | 62.2 | 1.03E+06 (R) |
| 2031 S2P_ZT_Ro  | 2 | 5.56  | 66.2 | 3.97E+06 (R) |
| 2181 S2P_ZT_Ro  | 3 | 5.28  | 60.8 | 3.35E+05 (K) |
| 105 S4P_ZT_Ro   | 2 | 15.39 | 82.1 | 5.52E+06 (R) |
| 158 S5P_ZT_Ro   | 3 | 14.56 | 83.8 | 7.52E+06 (R) |
| 176 S5P_ZT_Ro   | 2 | 14.2  | 100  | 3.09E+06 (R) |
| 247 S1P_ZT_Ro   | 3 | 13.32 | 77   | 1.65E+07 (R) |
| 256 S2P_ZT_Ro   | 2 | 13.22 | 95   | 3.33E+06 (R) |
| 266 S4P_ZT_Ro   | 3 | 13.09 | 81   | 1.26E+07 (R) |
| 272 S3P_ZT_Ro   | 3 | 12.98 | 79.4 | 7.08E+06 (R) |
| 330 S1P_ZT_Ro   | 2 | 12.43 | 85.6 | 6.36E+06 (R) |
| 338 S3P_ZT_Ro   | 2 | 12.38 | 80.3 | 2.87E+06 (R) |
| 391 X3P_ZT.47:  | 3 | 11.83 | 71.2 | 8.30E+05 (R) |
| 539 S2P_ZT_Ro   | 3 | 10.8  | 78.6 | 8.13E+06 (R) |
| 821 S1P_ZT_Ro   | 3 | 9.1   | 67.4 | 1.65E+07 (R) |
| 914 X3P_ZT.47:  | 2 | 8.72  | 73   | 3.85E+05 (R) |
| 999 S5P_ZT_Ro   | 3 | 8.37  | 61.6 | 7.52E+06 (R) |
| 1205 L3P_ZT.54: | 2 | 7.66  | 70.1 | 2.34E+06 (R) |
| 270 S3P_ZT_Ro   | 2 | 13.02 | 85.5 | 2.67E+07 (R) |
| 414 S5P_ZT_Ro   | 2 | 11.72 | 90.3 | 3.23E+07 (R) |
| 421 S2P_ZT_Ro   | 2 | 11.66 | 88.8 | 3.79E+07 (R) |
| 422 S1P_ZT_Ro   | 2 | 11.66 | 88.5 | 3.58E+07 (R) |
| 431 X3P_ZT.66:  | 2 | 11.58 | 77.9 | 2.43E+07 (R) |
| 447 S4P_ZT_Ro   | 2 | 11.49 | 85.8 | 2.91E+07 (R) |
| 452 X4P_ZT.66:  | 2 | 11.44 | 84   | 1.83E+07 (R) |
| 626 L3P_ZT.74:  | 2 | 10.16 | 88   | 1.69E+07 (R) |
| 663 X2P_ZT.70:  | 2 | 9.94  | 71.7 | 1.49E+06 (R) |
| 668 S2P_ZT_Ro   | 2 | 9.91  | 72.3 | 1.66E+07 (R) |
| 790 S3P_ZT_Ro   | 2 | 9.26  | 82   | 1.11E+07 (R) |
| 930 S5P_ZT_Ro   | 2 | 8.62  | 67.9 | 1.43E+07 (R) |
| 943 X4P_ZT.71:  | 2 | 8.58  | 71.6 | 8.35E+06 (R) |
| 960 S3P_ZT_Ro   | 2 | 8.51  | 63.7 | 1.11E+07 (R) |
| 991 X3P_ZT.71:  | 2 | 8.41  | 72.9 | 1.10E+07 (R) |
| 1090 L3P_ZT.78: | 2 | 8.06  | 83   | 6.82E+06 (R) |
| 1114 S5P_ZT_Ro  | 2 | 7.97  | 71.9 | 1.43E+07 (R) |
| 1264 S5P_ZT_Ro  | 2 | 7.44  | 62.7 | 9.62E+05 (R) |
| 1295 X3P_ZT.81: | 2 | 7.32  | 69.8 | 1.69E+06 (R) |
| 1311 L3P_ZT.88: | 2 | 7.27  | 62.8 | 1.23E+06 (R) |
| 1374 S2P_ZT_Ro  | 2 | 7.05  | 95.1 | 1.66E+07 (R) |
| 1393 S4P_ZT_Ro  | 2 | 7     | 61.4 | 1.24E+07 (R) |
| 1433 S4P_ZT_Ro  | 2 | 6.9   | 78.2 | 1.24E+07 (R) |
| 1441 X4P_ZT.81: | 2 | 6.88  | 74.6 | 1.57E+06 (R) |
| 1466 S1P_ZT_Ro  | 2 | 6.82  | 62.2 | 1.60E+07 (R) |
| 1747 S2P_ZT_Ro  | 2 | 6.2   | 100  | 2.04E+06 (R) |
| 1754 S5P_ZT_Ro  | 2 | 6.18  | 69.9 | 9.62E+05 (R) |
| 1940 S3P_ZT_Ro  | 2 | 5.73  | 86.3 | 1.11E+07 (R) |
| 2003 S4P_ZT_Ro  | 2 | 5.62  | 68.4 | 2.91E+07 (R) |

|      |            |   |      |      |              |
|------|------------|---|------|------|--------------|
| 1629 | S2P_ZT_Ro  | 3 | 6.46 | 62.6 | 2.21E+05 (R) |
| 2265 | S3P_ZT_Ro  | 2 | 5.15 | 78.9 | 4.69E+05 (R) |
| 2184 | S3P_ZT_Ro  | 4 | 5.27 | 80.6 | 8.44E+04 (R) |
| 1118 | S1P_ZT_Ro  | 4 | 7.96 | 65.5 | 1.02E+06 (R) |
| 1681 | S1P_ZT_Ro  | 5 | 6.32 | 79   | 1.85E+06 (R) |
| 940  | L4P_ZT.380 | 3 | 8.6  | 92.1 | 2.05E+07 (A) |
| 2244 | L4P_ZT.364 | 3 | 5.21 | 67.6 | 1.01E+06 (K) |
| 2280 | S4P_ZT_Ro  | 3 | 5.11 | 60.7 | 3.25E+04 (K) |
| 1855 | L2P_ZT.372 | 3 | 5.92 | 62.2 | 5.04E+05 (K) |
| 1899 | L2P_ZT.374 | 3 | 5.82 | 67.5 | 5.04E+05 (K) |
| 2046 | L5P_ZT.397 | 3 | 5.54 | 75.2 | 7.34E+05 (K) |
| 1414 | S1P_ZT_Ro  | 3 | 6.96 | 67.6 | 1.69E+06 (K) |
| 1788 | X4P_ZT.547 | 3 | 6.09 | 77.2 | 4.09E+04 (K) |
| 1938 | X1P_ZT.398 | 3 | 5.73 | 60.7 | 2.94E+04 (K) |
| 1993 | S1P_ZT_Ro  | 3 | 5.64 | 66.6 | 1.54E+05 (K) |
| 1994 | S1P_ZT_Ro  | 3 | 5.64 | 62.9 | 1.63E+06 (K) |
| 2067 | L2P_ZT.513 | 3 | 5.5  | 70.3 | 6.84E+04 (K) |
| 2121 | L5P_ZT.482 | 3 | 5.39 | 81.2 | 7.65E+04 (K) |
| 2282 | L5P_ZT.467 | 3 | 5.11 | 68.7 | 7.46E+04 (K) |
| 2312 | X2P_ZT.388 | 4 | 5.04 | 64.4 | 1.58E+05 (K) |
| 2017 | L5P_ZT.395 | 3 | 5.6  | 73.8 | 5.25E+05 (K) |
| 2276 | L4P_ZT.358 | 3 | 5.12 | 72.1 | 7.65E+04 (K) |
| 1344 | X2P_ZT.536 | 3 | 7.16 | 65.8 | 2.28E+04 (K) |
| 1382 | X3P_ZT.408 | 3 | 7.02 | 75.3 | 2.67E+05 (K) |
| 1450 | X2P_ZT.558 | 3 | 6.86 | 71.8 | 8.38E+04 (K) |
| 1472 | L2P_ZT.520 | 3 | 6.81 | 74.4 | 6.84E+04 (K) |
| 1633 | X4P_ZT.413 | 3 | 6.45 | 78.2 | 2.05E+05 (K) |
| 1676 | L2P_ZT.399 | 3 | 6.34 | 66.1 | 1.61E+05 (K) |
| 1712 | L5P_ZT.535 | 3 | 6.27 | 63.1 | 9.61E+04 (K) |
| 1770 | L2P_ZT.380 | 3 | 6.14 | 83.1 | 1.20E+05 (K) |
| 1805 | L2P_ZT.445 | 3 | 6.06 | 65.6 | 4.81E+04 (K) |
| 1825 | S1P_ZT_Ro  | 3 | 6    | 74.4 | 7.84E+04 (K) |
| 1891 | L2P_ZT.507 | 3 | 5.83 | 68.6 | 2.55E+04 (K) |
| 1908 | S5P_ZT_Ro  | 3 | 5.79 | 68.1 | 2.39E+05 (K) |
| 1927 | L5P_ZT.448 | 3 | 5.76 | 65.4 | 2.68E+06 (K) |
| 1957 | L1P_ZT.390 | 3 | 5.71 | 74.5 | 6.32E+04 (K) |
| 2001 | X2P_ZT.483 | 3 | 5.62 | 71.8 | 7.75E+04 (K) |
| 2021 | L2P_ZT.515 | 3 | 5.59 | 94.5 | 6.84E+04 (K) |
| 2025 | S1P_ZT_Ro  | 3 | 5.58 | 77.9 | 5.52E+05 (K) |
| 2129 | S1P_ZT_Ro  | 3 | 5.37 | 72.7 | 3.24E+06 (K) |
| 2142 | L5P_ZT.537 | 3 | 5.36 | 85.4 | 7.92E+04 (K) |
| 2162 | L5P_ZT.381 | 3 | 5.32 | 88   | 1.64E+08 (K) |
| 2173 | X4P_ZT.478 | 3 | 5.29 | 72.7 | 5.44E+04 (K) |
| 2178 | L5P_ZT.452 | 3 | 5.29 | 72.5 | 5.64E+05 (K) |
| 2195 | L5P_ZT.470 | 3 | 5.26 | 70   | 1.78E+05 (K) |
| 2258 | L5P_ZT.497 | 3 | 5.17 | 100  | 1.99E+05 (K) |
| 2262 | L5P_ZT.523 | 3 | 5.16 | 80.4 | 3.10E+05 (K) |

|                 |   |       |      |              |
|-----------------|---|-------|------|--------------|
| 2279 X3P_ZT.43: | 3 | 5.11  | 69.9 | 3.81E+04 (K) |
| 2321 L3P_ZT.39C | 3 | 5.02  | 72.8 | 7.74E+06 (K) |
| 2084 L3P_ZT.491 | 3 | 5.47  | 69.9 | 3.12E+05 (K) |
| 1787 X4P_ZT.54: | 4 | 6.09  | 81.3 | 1.94E+06 (K) |
| 1451 L1P_ZT.437 | 6 | 6.86  | 75.5 | 1.02E+05 (Y) |
| 2245 X3P_ZT.13: | 2 | 5.2   | 67.8 | 1.36E+05 (K) |
| 1845 X4P_ZT.34: | 6 | 5.93  | 61.1 | 7.52E+04 (D) |
| 1670 L5P_ZT.369 | 3 | 6.36  | 62.8 | 3.78E+05 (K) |
| 1212 S5P_ZT_Ro  | 5 | 7.62  | 62.8 | 2.65E+04 (K) |
| 2260 L3P_ZT.503 | 5 | 5.16  | 66.9 | 9.41E+04 (R) |
| 1209 L2P_ZT.496 | 3 | 7.65  | 76.9 | 8.75E+05 (V) |
| 1518 S4P_ZT_Ro  | 3 | 6.71  | 78   | 7.01E+05 (V) |
| 1519 S4P_ZT_Ro  | 3 | 6.71  | 76.5 | 7.01E+05 (V) |
| 1353 S2P_ZT_Ro  | 2 | 7.14  | 61.5 | 4.50E+06 (K) |
| 1421 S1P_ZT_Ro  | 2 | 6.94  | 71.6 | 6.12E+06 (K) |
| 1476 S4P_ZT_Ro  | 2 | 6.8   | 66   | 3.01E+06 (K) |
| 1548 L4P_ZT.209 | 2 | 6.65  | 60.2 | 2.11E+06 (K) |
| 1952 L4P_ZT.353 | 2 | 5.72  | 100  | 4.70E+05 (R) |
| 967 S5P_ZT_Ro   | 3 | 8.49  | 81.9 | 4.68E+05 (R) |
| 1079 S3P_ZT_Ro  | 3 | 8.08  | 65.6 | 5.53E+05 (R) |
| 1139 X1P_ZT.368 | 3 | 7.87  | 64.8 | 3.73E+05 (R) |
| 1790 X1P_ZT.367 | 3 | 6.09  | 77.7 | 3.73E+05 (R) |
| 1999 X3P_ZT.19: | 2 | 5.62  | 73.6 | 3.61E+05 (R) |
| 2095 S5P_ZT_Ro  | 3 | 5.45  | 61.7 | 4.68E+05 (R) |
| 2123 L2P_ZT.365 | 3 | 5.38  | 64.7 | 2.09E+05 (R) |
| 2218 L2P_ZT.366 | 3 | 5.23  | 73.5 | 2.09E+05 (R) |
| 806 L5P_ZT.145  | 2 | 9.18  | 80.5 | 4.92E+07 (K) |
| 828 X1P_ZT.146  | 2 | 9.08  | 77.8 | 7.96E+07 (K) |
| 896 X2P_ZT.145  | 2 | 8.78  | 77.1 | 3.35E+07 (K) |
| 906 L3P_ZT.145  | 2 | 8.76  | 77.6 | 4.32E+07 (K) |
| 912 S5P_ZT_Ro   | 2 | 8.73  | 82.4 | 7.12E+07 (K) |
| 997 L2P_ZT.134  | 2 | 8.38  | 83.2 | 5.19E+07 (K) |
| 1024 S1P_ZT_Ro  | 2 | 8.3   | 78.3 | 7.88E+07 (K) |
| 1025 X5P_ZT.144 | 2 | 8.29  | 76.8 | 5.30E+07 (K) |
| 1055 S4P_ZT_Ro  | 2 | 8.18  | 75.8 | 6.00E+07 (K) |
| 1163 L4P_ZT.152 | 2 | 7.79  | 76   | 3.51E+07 (K) |
| 1172 L4P_ZT.153 | 2 | 7.76  | 67.6 | 3.51E+07 (K) |
| 1240 X3P_ZT.139 | 2 | 7.51  | 77.9 | 5.07E+07 (K) |
| 1276 X4P_ZT.140 | 2 | 7.4   | 74.5 | 7.30E+07 (K) |
| 1319 X5P_ZT.14: | 2 | 7.24  | 65.9 | 5.30E+07 (K) |
| 1361 L1P_ZT.138 | 2 | 7.11  | 81.4 | 3.11E+07 (K) |
| 2311 L1P_ZT.392 | 2 | 5.05  | 64.2 | 3.58E+07 (K) |
| 1261 X5P_ZT.37: | 5 | 7.44  | 66.9 | 3.02E+05 (S) |
| 1667 X2P_ZT.37: | 5 | 6.36  | 65.3 | 6.26E+04 (S) |
| 212 S3P_ZT_Ro   | 2 | 13.76 | 70.6 | 3.01E+06 (K) |
| 518 S4P_ZT_Ro   | 2 | 10.93 | 63.8 | 3.27E+06 (K) |
| 755 S5P_ZT_Ro   | 2 | 9.47  | 70.3 | 2.46E+06 (K) |

|                 |   |       |      |              |
|-----------------|---|-------|------|--------------|
| 763 S3P_ZT_Ro   | 3 | 9.43  | 60.2 | 2.55E+06 (K) |
| 988 S3P_ZT_Ro   | 2 | 8.42  | 73.3 | 3.01E+06 (K) |
| 1389 X4P_ZT.506 | 2 | 7     | 63.3 | 8.31E+05 (K) |
| 1510 L3P_ZT.585 | 2 | 6.73  | 72.3 | 2.35E+06 (K) |
| 1627 S5P_ZT_Ro  | 3 | 6.46  | 62.2 | 1.82E+06 (K) |
| 302 S2P_ZT_Ro   | 2 | 12.63 | 79.6 | 5.11E+04 (K) |
| 407 X4P_ZT.158  | 3 | 11.76 | 79.7 | 6.14E+05 (K) |
| 501 S3P_ZT_Ro   | 3 | 11.06 | 67.8 | 2.28E+05 (K) |
| 512 L3P_ZT.164  | 3 | 10.96 | 71.8 | 2.44E+06 (K) |
| 529 L3P_ZT.162  | 3 | 10.86 | 77.7 | 2.44E+06 (K) |
| 547 S4P_ZT_Ro   | 3 | 10.76 | 60.8 | 3.18E+04 (K) |
| 880 X4P_ZT.159  | 3 | 8.86  | 74.9 | 6.14E+05 (K) |
| 1092 S4P_ZT_Ro  | 4 | 8.05  | 80.2 | 3.23E+05 (K) |
| 1096 S2P_ZT_Ro  | 4 | 8.04  | 63.2 | 4.29E+05 (K) |
| 1302 L3P_ZT.163 | 2 | 7.31  | 64.2 | 3.07E+04 (K) |
| 1332 L3P_ZT.161 | 3 | 7.21  | 85.6 | 2.44E+06 (K) |
| 1376 L3P_ZT.162 | 2 | 7.05  | 70.3 | 3.07E+04 (K) |
| 95 S4P_ZT_Ro    | 3 | 15.6  | 85.1 | 7.86E+06 (K) |
| 148 S2P_ZT_Ro   | 3 | 14.64 | 82   | 6.64E+06 (K) |
| 159 X4P_ZT.223  | 2 | 14.53 | 81.7 | 1.97E+06 (K) |
| 177 S4P_ZT_Ro   | 4 | 14.2  | 85.4 | 2.58E+06 (K) |
| 211 X4P_ZT.220  | 3 | 13.76 | 74.6 | 9.60E+06 (K) |
| 223 S4P_ZT_Ro   | 2 | 13.65 | 89.5 | 2.22E+06 (K) |
| 233 L3P_ZT.222  | 2 | 13.53 | 76.7 | 3.69E+06 (K) |
| 238 S3P_ZT_Ro   | 3 | 13.44 | 78.2 | 7.13E+06 (K) |
| 249 S2P_ZT_Ro   | 4 | 13.31 | 86   | 2.99E+06 (K) |
| 322 S2P_ZT_Ro   | 2 | 12.5  | 72.8 | 1.96E+06 (K) |
| 323 L3P_ZT.233  | 2 | 12.5  | 75.1 | 1.09E+05 (K) |
| 377 S1P_ZT_Ro   | 4 | 11.94 | 75.1 | 2.96E+06 (K) |
| 378 S3P_ZT_Ro   | 4 | 11.93 | 85   | 2.55E+06 (K) |
| 399 S1P_ZT_Ro   | 3 | 11.81 | 73.5 | 6.70E+06 (K) |
| 411 S1P_ZT_Ro   | 3 | 11.76 | 80.5 | 6.70E+06 (K) |
| 420 S2P_ZT_Ro   | 2 | 11.66 | 76.5 | 1.96E+06 (K) |
| 494 L3P_ZT.218  | 3 | 11.15 | 78.3 | 1.96E+07 (K) |
| 555 X4P_ZT.236  | 3 | 10.68 | 65.6 | 3.24E+05 (K) |
| 564 L3P_ZT.219  | 2 | 10.63 | 68.7 | 3.69E+06 (K) |
| 576 S1P_ZT_Ro   | 2 | 10.47 | 72.2 | 2.06E+06 (K) |
| 658 S4P_ZT_Ro   | 2 | 9.96  | 68.6 | 9.15E+04 (K) |
| 722 L3P_ZT.221  | 2 | 9.64  | 65.3 | 3.69E+06 (K) |
| 747 X4P_ZT.223  | 4 | 9.5   | 67.4 | 3.33E+05 (K) |
| 777 X4P_ZT.223  | 2 | 9.35  | 63   | 1.97E+06 (K) |
| 795 S1P_ZT_Ro   | 2 | 9.25  | 82.8 | 2.06E+06 (K) |
| 1065 X4P_ZT.235 | 2 | 8.13  | 62.3 | 1.05E+05 (K) |
| 1283 S3P_ZT_Ro  | 3 | 7.38  | 65   | 7.13E+06 (K) |
| 1470 S1P_ZT_Ro  | 2 | 6.81  | 60.8 | 6.98E+04 (K) |
| 1720 L1P_ZT.205 | 4 | 6.25  | 73.4 | 1.86E+04 (K) |
| 2177 L3P_ZT.232 | 2 | 5.29  | 73   | 1.09E+05 (K) |

|                |   |       |      |              |
|----------------|---|-------|------|--------------|
| 2198 S4P_ZT_Ro | 3 | 5.25  | 87.1 | 7.86E+06 (K) |
| 41 S5P_ZT_Ro   | 2 | 17.92 | 84.8 | 4.46E+06 (K) |
| 58 S3P_ZT_Ro   | 2 | 17.04 | 78.5 | 8.20E+06 (K) |
| 75 S4P_ZT_Ro   | 2 | 16.19 | 86.2 | 5.68E+06 (K) |
| 77 S3P_ZT_Ro   | 2 | 16.16 | 75.6 | 8.20E+06 (K) |
| 108 S1P_ZT_Ro  | 2 | 15.33 | 74.9 | 7.57E+06 (K) |
| 121 S3P_ZT_Ro  | 2 | 15.03 | 82.9 | 8.20E+06 (K) |
| 139 S1P_ZT_Ro  | 3 | 14.83 | 74.6 | 5.38E+07 (K) |
| 153 S2P_ZT_Ro  | 3 | 14.6  | 73.6 | 2.05E+07 (K) |
| 173 S1P_ZT_Ro  | 2 | 14.27 | 70.1 | 7.57E+06 (K) |
| 185 S3P_ZT_Ro  | 3 | 14.09 | 72.5 | 5.25E+07 (K) |
| 200 S5P_ZT_Ro  | 3 | 13.92 | 68.8 | 3.31E+07 (K) |
| 209 X4P_ZT.57  | 2 | 13.81 | 72.7 | 2.45E+06 (K) |
| 213 S5P_ZT_Ro  | 2 | 13.74 | 95   | 4.46E+06 (K) |
| 250 X3P_ZT.56  | 2 | 13.3  | 65   | 2.29E+06 (K) |
| 295 S2P_ZT_Ro  | 2 | 12.7  | 66.3 | 2.69E+06 (K) |
| 309 S4P_ZT_Ro  | 3 | 12.59 | 70.4 | 4.00E+07 (K) |
| 346 S5P_ZT_Ro  | 2 | 12.29 | 66.3 | 4.46E+06 (K) |
| 364 S2P_ZT_Ro  | 2 | 12.1  | 70.1 | 2.69E+06 (K) |
| 409 X3P_ZT.56  | 3 | 11.76 | 62.3 | 1.26E+07 (K) |
| 442 X5P_ZT.56  | 3 | 11.52 | 72.8 | 6.19E+05 (K) |
| 473 S4P_ZT_Ro  | 2 | 11.3  | 84   | 5.68E+06 (K) |
| 477 S2P_ZT_Ro  | 2 | 11.28 | 60.7 | 2.69E+06 (K) |
| 524 S1P_ZT_Ro  | 2 | 10.89 | 77.2 | 7.57E+06 (K) |
| 583 X2P_ZT.60  | 2 | 10.42 | 82.3 | 8.25E+04 (K) |
| 621 S4P_ZT_Ro  | 2 | 10.21 | 89.7 | 1.27E+05 (K) |
| 628 S5P_ZT_Ro  | 2 | 10.15 | 66.8 | 6.47E+04 (K) |
| 640 L3P_ZT.65  | 2 | 10.06 | 63.3 | 3.08E+06 (K) |
| 1016 S1P_ZT_Ro | 3 | 8.33  | 72.1 | 5.38E+07 (K) |
| 1503 X3P_ZT.50 | 2 | 6.74  | 70.9 | 2.29E+06 (K) |
| 1718 S3P_ZT_Ro | 2 | 6.25  | 71.5 | 2.52E+04 (K) |
| 67 X3P_ZT.12   | 2 | 16.51 | 84.9 | 5.28E+05 (K) |
| 88 S4P_ZT_Ro   | 3 | 15.72 | 80   | 2.65E+06 (K) |
| 138 S1P_ZT_Ro  | 4 | 14.83 | 84   | 9.97E+06 (K) |
| 183 S2P_ZT_Ro  | 3 | 14.1  | 84.4 | 2.79E+06 (K) |
| 217 X4P_ZT.11  | 3 | 13.69 | 85   | 2.31E+06 (K) |
| 248 L3P_ZT.12  | 3 | 13.32 | 89.6 | 2.34E+06 (K) |
| 254 S1P_ZT_Ro  | 3 | 13.24 | 65.5 | 3.22E+06 (K) |
| 345 X3P_ZT.12  | 3 | 12.3  | 84.8 | 3.18E+06 (K) |
| 366 S3P_ZT_Ro  | 4 | 12.09 | 66   | 5.04E+05 (K) |
| 373 S1P_ZT_Ro  | 3 | 11.98 | 72.3 | 3.22E+06 (K) |
| 393 S4P_ZT_Ro  | 4 | 11.83 | 82.5 | 8.01E+06 (K) |
| 417 S5P_ZT_Ro  | 3 | 11.67 | 68.3 | 2.61E+05 (K) |
| 436 S5P_ZT_Ro  | 3 | 11.55 | 79.7 | 2.40E+06 (K) |
| 462 X4P_ZT.11  | 2 | 11.37 | 64.2 | 4.26E+05 (K) |
| 536 L3P_ZT.12  | 3 | 10.81 | 100  | 2.34E+06 (K) |
| 538 S5P_ZT_Ro  | 4 | 10.8  | 88.9 | 7.89E+06 (K) |

|                |   |       |      |              |
|----------------|---|-------|------|--------------|
| 545 S1P_ZT_Ro  | 3 | 10.77 | 74.3 | 1.27E+05 (K) |
| 617 S2P_ZT_Ro  | 3 | 10.22 | 65.4 | 2.42E+05 (K) |
| 637 L3P_ZT.12  | 4 | 10.08 | 80.7 | 6.84E+06 (K) |
| 677 S3P_ZT_Ro  | 4 | 9.85  | 77   | 9.72E+06 (K) |
| 678 S4P_ZT_Ro  | 3 | 9.84  | 72.7 | 2.65E+06 (K) |
| 694 L3P_ZT.12  | 3 | 9.77  | 68.1 | 2.34E+06 (K) |
| 740 S5P_ZT_Ro  | 4 | 9.56  | 64   | 5.86E+05 (K) |
| 771 S3P_ZT_Ro  | 3 | 9.4   | 69.2 | 3.09E+06 (K) |
| 861 S2P_ZT_Ro  | 4 | 8.95  | 68.9 | 9.15E+06 (K) |
| 905 S5P_ZT_Ro  | 3 | 8.76  | 63.1 | 2.40E+06 (K) |
| 963 S3P_ZT_Ro  | 3 | 8.5   | 66.1 | 3.09E+06 (K) |
| 996 S5P_ZT_Ro  | 2 | 8.38  | 65.3 | 9.58E+04 (K) |
| 1095 S4P_ZT_Ro | 4 | 8.04  | 60.4 | 8.01E+06 (K) |
| 1211 S2P_ZT_Ro | 4 | 7.63  | 64.1 | 5.89E+05 (K) |
| 2039 X4P_ZT.13 | 4 | 5.54  | 70.7 | 1.47E+05 (K) |
| 2087 S4P_ZT_Ro | 4 | 5.46  | 64.3 | 6.93E+05 (K) |
| 22 S2P_ZT_Ro   | 2 | 19.43 | 96.2 | 5.04E+06 (K) |
| 48 S4P_ZT_Ro   | 2 | 17.62 | 87.6 | 9.25E+06 (K) |
| 63 S1P_ZT_Ro   | 2 | 16.83 | 84.9 | 5.93E+06 (K) |
| 83 S3P_ZT_Ro   | 2 | 15.88 | 83.9 | 4.46E+06 (K) |
| 90 S5P_ZT_Ro   | 3 | 15.69 | 78.7 | 2.21E+06 (K) |
| 91 S1P_ZT_Ro   | 4 | 15.66 | 95   | 5.85E+07 (K) |
| 122 S1P_ZT_Ro  | 2 | 15.01 | 90.2 | 5.93E+06 (K) |
| 123 S5P_ZT_Ro  | 3 | 14.97 | 82.9 | 3.76E+07 (K) |
| 124 S2P_ZT_Ro  | 3 | 14.97 | 80.9 | 2.24E+07 (K) |
| 140 S3P_ZT_Ro  | 2 | 14.81 | 87.6 | 4.46E+06 (K) |
| 149 S4P_ZT_Ro  | 4 | 14.62 | 85.2 | 1.09E+08 (K) |
| 161 X4P_ZT.17  | 4 | 14.45 | 94.5 | 3.55E+07 (K) |
| 168 S2P_ZT_Ro  | 2 | 14.34 | 85.7 | 5.04E+06 (K) |
| 175 L3P_ZT.17  | 3 | 14.21 | 82.5 | 5.19E+07 (K) |
| 179 X4P_ZT.17  | 3 | 14.18 | 89.1 | 1.47E+07 (K) |
| 184 S2P_ZT_Ro  | 4 | 14.1  | 84.5 | 6.16E+07 (K) |
| 205 S1P_ZT_Ro  | 3 | 13.88 | 77.9 | 2.18E+07 (K) |
| 206 S5P_ZT_Ro  | 4 | 13.87 | 83.8 | 1.11E+08 (K) |
| 216 S3P_ZT_Ro  | 3 | 13.7  | 81.4 | 2.23E+06 (K) |
| 234 S3P_ZT_Ro  | 3 | 13.49 | 78.3 | 2.23E+06 (K) |
| 242 X3P_ZT.17  | 4 | 13.39 | 78.9 | 4.34E+07 (K) |
| 259 X3P_ZT.17  | 2 | 13.2  | 81.8 | 4.70E+06 (K) |
| 277 X4P_ZT.19  | 3 | 12.87 | 70.9 | 2.48E+06 (K) |
| 279 S1P_ZT_Ro  | 3 | 12.85 | 87.8 | 2.30E+06 (K) |
| 280 X4P_ZT.17  | 2 | 12.84 | 85.6 | 3.29E+06 (K) |
| 291 S3P_ZT_Ro  | 4 | 12.71 | 73.3 | 5.49E+06 (K) |
| 298 S4P_ZT_Ro  | 3 | 12.64 | 70.6 | 2.10E+06 (K) |
| 319 S4P_ZT_Ro  | 3 | 12.53 | 81.1 | 3.98E+07 (K) |
| 326 S3P_ZT_Ro  | 4 | 12.48 | 83.9 | 4.51E+07 (K) |
| 340 S2P_ZT_Ro  | 2 | 12.37 | 74   | 7.02E+05 (K) |
| 353 L3P_ZT.19  | 2 | 12.22 | 81.1 | 2.52E+05 (K) |

|                |   |       |      |              |
|----------------|---|-------|------|--------------|
| 357 S4P_ZT_Ro  | 3 | 12.18 | 70.8 | 2.10E+06 (K) |
| 358 L1P_ZT.165 | 3 | 12.18 | 76.1 | 1.01E+06 (K) |
| 359 L3P_ZT.193 | 4 | 12.17 | 68.8 | 4.92E+06 (K) |
| 381 X4P_ZT.190 | 2 | 11.88 | 78.5 | 4.81E+05 (K) |
| 394 S3P_ZT_Ro  | 2 | 11.83 | 76.2 | 4.46E+06 (K) |
| 396 S5P_ZT_Ro  | 4 | 11.82 | 70   | 5.08E+06 (K) |
| 402 X3P_ZT.190 | 2 | 11.79 | 71.9 | 1.77E+05 (K) |
| 403 S5P_ZT_Ro  | 2 | 11.79 | 69.3 | 7.21E+06 (K) |
| 408 X4P_ZT.176 | 2 | 11.76 | 80.1 | 3.29E+06 (K) |
| 418 S5P_ZT_Ro  | 2 | 11.67 | 72.9 | 7.21E+06 (K) |
| 430 S3P_ZT_Ro  | 2 | 11.59 | 80.1 | 4.46E+06 (K) |
| 441 S1P_ZT_Ro  | 4 | 11.53 | 65.3 | 5.85E+07 (K) |
| 455 S1P_ZT_Ro  | 2 | 11.42 | 81.5 | 7.94E+05 (K) |
| 458 S4P_ZT_Ro  | 2 | 11.4  | 72   | 5.85E+05 (K) |
| 464 S4P_ZT_Ro  | 3 | 11.37 | 67.2 | 2.10E+06 (K) |
| 465 S3P_ZT_Ro  | 3 | 11.37 | 69.6 | 1.69E+07 (K) |
| 470 S4P_ZT_Ro  | 3 | 11.33 | 70.4 | 3.98E+07 (K) |
| 478 S5P_ZT_Ro  | 2 | 11.26 | 83.4 | 7.21E+06 (K) |
| 479 S2P_ZT_Ro  | 2 | 11.25 | 72.9 | 7.02E+05 (K) |
| 481 S3P_ZT_Ro  | 2 | 11.23 | 83.7 | 4.22E+05 (K) |
| 483 S2P_ZT_Ro  | 3 | 11.22 | 70   | 2.12E+06 (K) |
| 490 L3P_ZT.179 | 4 | 11.18 | 71.3 | 1.42E+08 (K) |
| 495 S5P_ZT_Ro  | 2 | 11.14 | 77   | 5.27E+05 (K) |
| 508 S4P_ZT_Ro  | 2 | 10.98 | 78.1 | 9.25E+06 (K) |
| 510 S5P_ZT_Ro  | 4 | 10.96 | 66.1 | 1.11E+08 (K) |
| 511 S5P_ZT_Ro  | 3 | 10.96 | 62.9 | 3.76E+07 (K) |
| 521 S5P_ZT_Ro  | 2 | 10.9  | 74.8 | 7.21E+06 (K) |
| 546 L3P_ZT.179 | 3 | 10.77 | 79.9 | 5.19E+07 (K) |
| 554 L3P_ZT.181 | 2 | 10.7  | 61   | 1.03E+07 (K) |
| 567 S5P_ZT_Ro  | 3 | 10.59 | 66   | 2.21E+06 (K) |
| 577 X4P_ZT.174 | 3 | 10.46 | 69.2 | 1.47E+07 (K) |
| 582 S1P_ZT_Ro  | 2 | 10.43 | 75.4 | 5.93E+06 (K) |
| 584 L3P_ZT.180 | 2 | 10.42 | 73.2 | 1.03E+07 (K) |
| 589 S1P_ZT_Ro  | 3 | 10.4  | 79.7 | 2.18E+07 (K) |
| 594 S3P_ZT_Ro  | 3 | 10.38 | 68.9 | 2.23E+06 (K) |
| 599 L3P_ZT.183 | 3 | 10.35 | 88.4 | 5.19E+07 (K) |
| 602 L3P_ZT.182 | 2 | 10.32 | 66.1 | 1.03E+07 (K) |
| 619 X3P_ZT.174 | 3 | 10.21 | 73.3 | 1.81E+07 (K) |
| 636 S2P_ZT_Ro  | 2 | 10.08 | 71.5 | 5.04E+06 (K) |
| 643 L3P_ZT.179 | 2 | 10.03 | 62.2 | 1.03E+07 (K) |
| 650 S5P_ZT_Ro  | 2 | 9.99  | 73.3 | 5.27E+05 (K) |
| 653 S4P_ZT_Ro  | 4 | 9.98  | 84.1 | 5.04E+06 (K) |
| 670 X3P_ZT.174 | 2 | 9.89  | 73.4 | 4.70E+06 (K) |
| 693 S1P_ZT_Ro  | 4 | 9.77  | 68.2 | 6.83E+06 (K) |
| 707 S5P_ZT_Ro  | 2 | 9.7   | 67   | 7.21E+06 (K) |
| 724 S1P_ZT_Ro  | 2 | 9.63  | 64.8 | 5.93E+06 (K) |
| 727 X4P_ZT.174 | 3 | 9.6   | 68.5 | 1.47E+07 (K) |



|                 |   |       |      |              |
|-----------------|---|-------|------|--------------|
| 733 S4P_ZT_Ro   | 2 | 9.58  | 63.6 | 5.85E+05 (K) |
| 743 S4P_ZT_Ro   | 2 | 9.55  | 69.7 | 9.25E+06 (K) |
| 757 S4P_ZT_Ro   | 2 | 9.44  | 70.9 | 5.85E+05 (K) |
| 784 S2P_ZT_Ro   | 2 | 9.3   | 76.3 | 7.02E+05 (K) |
| 796 S5P_ZT_Ro   | 2 | 9.24  | 70.3 | 7.21E+06 (K) |
| 844 L3P_ZT.195  | 2 | 9.01  | 72   | 2.52E+05 (K) |
| 845 X4P_ZT.190  | 3 | 9     | 61.4 | 2.48E+06 (K) |
| 895 L3P_ZT.194  | 3 | 8.8   | 66.6 | 2.43E+06 (K) |
| 922 L3P_ZT.177  | 2 | 8.69  | 69.9 | 1.03E+07 (K) |
| 1011 S2P_ZT_Ro  | 4 | 8.34  | 69.7 | 6.10E+06 (K) |
| 1023 S5P_ZT_Ro  | 3 | 8.3   | 70.7 | 2.21E+06 (K) |
| 1027 S1P_ZT_Ro  | 3 | 8.28  | 74.3 | 2.18E+07 (K) |
| 1049 S3P_ZT_Ro  | 2 | 8.21  | 68.7 | 4.22E+05 (K) |
| 1220 S4P_ZT_Ro  | 2 | 7.58  | 61.2 | 9.25E+06 (K) |
| 1234 X3P_ZT.191 | 2 | 7.54  | 66.6 | 1.77E+05 (K) |
| 1267 S1P_ZT_Ro  | 3 | 7.44  | 60.1 | 2.18E+07 (K) |
| 1300 S2P_ZT_Ro  | 4 | 7.31  | 70.5 | 6.16E+07 (K) |
| 1307 S2P_ZT_Ro  | 4 | 7.3   | 66.3 | 6.16E+07 (K) |
| 1422 L1P_ZT.166 | 3 | 6.93  | 88   | 1.00E+06 (K) |
| 1445 L3P_ZT.191 | 3 | 6.88  | 61.8 | 2.43E+06 (K) |
| 1535 S2P_ZT_Ro  | 3 | 6.68  | 64.6 | 2.12E+06 (K) |
| 1613 X4P_ZT.191 | 3 | 6.48  | 62.3 | 2.48E+06 (K) |
| 2010 L1P_ZT.178 | 2 | 5.61  | 61.2 | 1.02E+05 (K) |
| 2210 S1P_ZT_Ro  | 2 | 5.24  | 72   | 2.86E+05 (K) |
| 1810 X3P_ZT.186 | 4 | 6.04  | 70   | 6.51E+05 (K) |
| 1762 L5P_ZT.542 | 4 | 6.17  | 75.4 | 5.52E+04 (D) |
| 857 L1P_ZT.319  | 3 | 8.96  | 65.3 | 2.79E+05 (Q) |
| 276 S3P_ZT_Ro   | 2 | 12.91 | 85.7 | 1.23E+05 (G) |
| 544 S2P_ZT_Ro   | 2 | 10.77 | 67.4 | 3.03E+05 (G) |
| 679 S4P_ZT_Ro   | 2 | 9.84  | 65.3 | 4.44E+05 (G) |
| 2277 L5P_ZT.123 | 3 | 5.12  | 62.9 | 1.09E+05 (K) |
| 2310 S5P_ZT_Ro  | 6 | 5.05  | 70.4 | 3.78E+04 (K) |
| 1924 L2P_ZT.354 | 5 | 5.76  | 64.1 | 1.74E+06 (K) |
| 1983 X2P_ZT.383 | 5 | 5.65  | 84.7 | 1.17E+06 (K) |
| 2037 L3P_ZT.378 | 5 | 5.55  | 65.9 | 5.80E+05 (K) |
| 2253 X4P_ZT.376 | 5 | 5.17  | 74   | 7.77E+04 (K) |
| 923 L2P_ZT.261  | 5 | 8.66  | 66.4 | 5.37E+06 (R) |
| 1052 X5P_ZT.271 | 5 | 8.19  | 69.4 | 2.90E+06 (R) |
| 1137 L3P_ZT.269 | 5 | 7.88  | 64   | 9.93E+05 (R) |
| 1149 S3P_ZT_Ro  | 5 | 7.85  | 62.1 | 2.77E+06 (R) |
| 1150 S2P_ZT_Ro  | 5 | 7.85  | 65.3 | 2.07E+06 (R) |
| 1333 L5P_ZT.278 | 5 | 7.21  | 64.4 | 7.91E+05 (R) |
| 1554 X1P_ZT.269 | 5 | 6.63  | 63.9 | 2.62E+05 (R) |
| 1632 X4P_ZT.274 | 5 | 6.45  | 82   | 2.11E+06 (R) |
| 1833 S2P_ZT_Ro  | 5 | 5.97  | 71.8 | 2.07E+06 (R) |
| 1844 X4P_ZT.271 | 5 | 5.93  | 89.4 | 2.11E+06 (R) |
| 1904 S1P_ZT_Ro  | 5 | 5.8   | 73.8 | 2.23E+06 (R) |

|                 |   |       |      |              |
|-----------------|---|-------|------|--------------|
| 1963 S4P_ZT_Ro  | 5 | 5.69  | 69.7 | 2.45E+06 (R) |
| 2285 S5P_ZT_Ro  | 5 | 5.1   | 73.4 | 6.33E+05 (R) |
| 1038 L3P_ZT.363 | 3 | 8.26  | 68.2 | 6.83E+05 (-) |
| 1371 L3P_ZT.353 | 3 | 7.07  | 63.3 | 1.64E+06 (G) |
| 1250 X5P_ZT.649 | 3 | 7.48  | 83.9 | 1.33E+05 (K) |
| 2148 L3P_ZT.519 | 6 | 5.34  | 61.1 | 6.08E+04 (K) |
| 1256 S1P_ZT_Ro  | 3 | 7.47  | 63.4 | 8.48E+04 (R) |
| 2130 S1P_ZT_Ro  | 3 | 5.37  | 67.7 | 8.48E+04 (R) |
| 1245 S5P_ZT_Ro  | 2 | 7.5   | 100  | 5.87E+06 (K) |
| 1317 X5P_ZT.466 | 2 | 7.25  | 100  | 4.93E+06 (K) |
| 2042 S2P_ZT_Ro  | 2 | 5.54  | 93.2 | 5.37E+07 (K) |
| 76 S3P_ZT_Ro    | 2 | 16.16 | 86.6 | 9.93E+07 (K) |
| 78 L3P_ZT.105   | 2 | 16.14 | 85.4 | 2.70E+08 (K) |
| 99 S4P_ZT_Ro    | 2 | 15.54 | 83.4 | 1.93E+08 (K) |
| 126 X4P_ZT.873  | 2 | 14.96 | 81.3 | 2.09E+08 (K) |
| 131 X3P_ZT.986  | 2 | 14.91 | 82.2 | 1.65E+08 (K) |
| 155 S1P_ZT_Ro   | 2 | 14.57 | 80.4 | 1.97E+08 (K) |
| 164 S4P_ZT_Ro   | 2 | 14.42 | 69.8 | 9.11E+07 (K) |
| 170 S2P_ZT_Ro   | 2 | 14.29 | 82.9 | 1.15E+08 (K) |
| 171 S5P_ZT_Ro   | 2 | 14.27 | 82.4 | 1.68E+08 (K) |
| 182 S2P_ZT_Ro   | 2 | 14.13 | 85.7 | 5.72E+07 (K) |
| 239 S2P_ZT_Ro   | 2 | 13.42 | 75.4 | 5.72E+07 (K) |
| 241 S1P_ZT_Ro   | 2 | 13.41 | 68.9 | 9.18E+07 (K) |
| 271 L3P_ZT.113  | 2 | 13    | 67.3 | 1.21E+08 (K) |
| 297 S5P_ZT_Ro   | 2 | 12.67 | 71   | 7.88E+07 (K) |
| 310 S3P_ZT_Ro   | 2 | 12.59 | 72.3 | 4.67E+07 (K) |
| 450 S3P_ZT_Ro   | 2 | 11.46 | 69.3 | 4.67E+07 (K) |
| 497 X5P_ZT.106  | 2 | 11.13 | 68.6 | 3.11E+06 (K) |
| 552 S5P_ZT_Ro   | 2 | 10.71 | 63.2 | 7.88E+07 (K) |
| 738 X4P_ZT.976  | 2 | 9.56  | 62.9 | 2.09E+08 (K) |
| 1320 X5P_ZT.993 | 2 | 7.24  | 62.8 | 3.11E+06 (K) |
| 288 S4P_ZT_Ro   | 2 | 12.75 | 82.7 | 1.70E+06 (K) |
| 300 S1P_ZT_Ro   | 2 | 12.64 | 82.9 | 2.14E+06 (K) |
| 463 X4P_ZT.183  | 2 | 11.37 | 78.9 | 1.45E+06 (K) |
| 515 S5P_ZT_Ro   | 2 | 10.93 | 81.1 | 1.55E+06 (K) |
| 588 S3P_ZT_Ro   | 2 | 10.4  | 78.9 | 2.39E+06 (K) |
| 688 S2P_ZT_Ro   | 2 | 9.79  | 76   | 2.62E+06 (K) |
| 929 X3P_ZT.183  | 2 | 8.62  | 74.1 | 1.78E+06 (K) |
| 939 L3P_ZT.187  | 2 | 8.6   | 64.5 | 1.09E+06 (K) |
| 246 S2P_ZT_Ro   | 2 | 13.35 | 85.9 | 2.59E+07 (K) |
| 336 X4P_ZT.307  | 2 | 12.39 | 80   | 1.78E+07 (K) |
| 416 X4P_ZT.306  | 2 | 11.68 | 70.8 | 1.78E+07 (K) |
| 486 S1P_ZT_Ro   | 2 | 11.2  | 73.4 | 3.03E+07 (K) |
| 890 L3P_ZT.303  | 2 | 8.83  | 74   | 1.61E+07 (K) |
| 114 X4P_ZT.219  | 4 | 15.21 | 74.8 | 2.40E+04 (K) |
| 1606 S4P_ZT_Ro  | 7 | 6.5   | 60.3 | 1.30E+06 (R) |
| 1973 S1P_ZT_Ro  | 4 | 5.67  | 100  | 6.30E+05 (R) |

|      |           |   |       |      |              |
|------|-----------|---|-------|------|--------------|
| 128  | S3P_ZT_Ro | 4 | 14.93 | 65.8 | 1.42E+06 (R) |
| 197  | S2P_ZT_Ro | 4 | 13.98 | 68.6 | 1.55E+06 (R) |
| 230  | S2P_ZT_Ro | 4 | 13.56 | 61.1 | 1.55E+06 (R) |
| 278  | X3P_ZT.21 | 3 | 12.85 | 68.6 | 1.57E+06 (R) |
| 443  | X4P_ZT.21 | 4 | 11.52 | 66.7 | 1.03E+06 (R) |
| 563  | S3P_ZT_Ro | 3 | 10.63 | 62.5 | 5.76E+05 (R) |
| 711  | S3P_ZT_Ro | 4 | 9.69  | 63.2 | 1.42E+06 (R) |
| 1019 | X3P_ZT.21 | 3 | 8.31  | 63.4 | 1.57E+06 (R) |
| 1887 | L3P_ZT.21 | 4 | 5.84  | 65.8 | 1.45E+06 (R) |
| 1540 | L5P_ZT.44 | 5 | 6.66  | 69.2 | 1.44E+06 (R) |
| 2229 | S3P_ZT_Ro | 6 | 5.22  | 100  | 7.34E+04 (K) |
| 934  | S5P_ZT_Ro | 7 | 8.61  | 60.9 | 1.64E+04 (R) |
| 1523 | S5P_ZT_Ro | 7 | 6.7   | 61.6 | 2.24E+04 (R) |
| 1123 | S4P_ZT_Ro | 4 | 7.94  | 61   | 2.07E+05 (K) |
| 1565 | S5P_ZT_Ro | 6 | 6.6   | 61.3 | 1.30E+05 (K) |
| 2309 | X5P_ZT.50 | 7 | 5.05  | 65.6 | 7.52E+06 (K) |
| 1736 | S2P_ZT_Ro | 3 | 6.22  | 100  | 1.16E+06 (R) |
| 1874 | X4P_ZT.30 | 3 | 5.88  | 64.8 | 9.62E+04 (R) |
| 1979 | L5P_ZT.21 | 2 | 5.66  | 83.7 | 1.22E+06 (R) |
| 2283 | L5P_ZT.49 | 4 | 5.11  | 63.2 | 7.42E+04 (R) |
| 2238 | X1P_ZT.14 | 2 | 5.21  | 90.6 | 9.25E+06 (K) |
| 1077 | L3P_ZT.33 | 4 | 8.09  | 67.4 | 8.89E+04 (K) |
| 2024 | X1P_ZT.49 | 3 | 5.58  | 87.9 | 1.03E+05 (K) |
| 1975 | X1P_ZT.21 | 2 | 5.66  | 75.6 | 2.44E+06 (R) |
| 1474 | X3P_ZT.50 | 3 | 6.8   | 63.9 | 2.23E+06 (R) |
| 1784 | S2P_ZT_Ro | 3 | 6.1   | 63.5 | 1.31E+06 (R) |
| 1851 | X3P_ZT.50 | 3 | 5.92  | 100  | 2.23E+06 (R) |
| 1853 | S5P_ZT_Ro | 3 | 5.92  | 100  | 1.60E+06 (R) |
| 2106 | L5P_ZT.49 | 3 | 5.42  | 100  | 9.92E+05 (R) |
| 2249 | L4P_ZT.11 | 4 | 5.2   | 100  | 5.08E+04 (K) |
| 1941 | L2P_ZT.32 | 3 | 5.73  | 67.7 | 5.09E+04 (R) |
| 2317 | X1P_ZT.27 | 2 | 5.03  | 61.4 | 3.51E+05 (K) |
| 1654 | S3P_ZT_Ro | 4 | 6.4   | 65.1 | 1.92E+06 (R) |
| 2251 | X2P_ZT.24 | 3 | 5.18  | 78.8 | 1.77E+04 (R) |
| 1424 | L4P_ZT.27 | 3 | 6.93  | 86.6 | 2.09E+06 (R) |
| 1567 | S2P_ZT_Ro | 4 | 6.6   | 76.4 | 5.49E+04 (R) |
| 1202 | S4P_ZT_Ro | 3 | 7.66  | 62.5 | 2.65E+06 (R) |
| 1303 | L5P_ZT.47 | 3 | 7.31  | 62.3 | 1.66E+05 (R) |
| 1469 | S5P_ZT_Ro | 3 | 6.81  | 64.9 | 2.14E+06 (R) |
| 2102 | X4P_ZT.52 | 4 | 5.42  | 100  | 5.85E+04 (R) |
| 1780 | X5P_ZT.17 | 4 | 6.11  | 67.7 | 1.38E+05 (K) |
| 1974 | L1P_ZT.15 | 4 | 5.67  | 66.4 | 5.89E+04 (K) |
| 1221 | L2P_ZT.22 | 3 | 7.58  | 84.6 | 5.75E+05 (R) |
| 1313 | X4P_ZT.24 | 3 | 7.26  | 74.5 | 7.73E+05 (R) |
| 1323 | S3P_ZT_Ro | 3 | 7.23  | 75.7 | 9.65E+05 (R) |
| 1592 | S4P_ZT_Ro | 3 | 6.54  | 68.2 | 1.62E+06 (R) |
| 1860 | S2P_ZT_Ro | 3 | 5.91  | 79.2 | 8.77E+05 (R) |

|                 |   |       |      |              |
|-----------------|---|-------|------|--------------|
| 1894 X3P_ZT.248 | 3 | 5.82  | 69.9 | 1.34E+06 (R) |
| 2011 L1P_ZT.228 | 3 | 5.61  | 67.8 | 7.09E+05 (R) |
| 2072 X4P_ZT.528 | 7 | 5.48  | 68.2 | 2.72E+05 (S) |
| 917 L1P_ZT.458  | 3 | 8.72  | 73.9 | 4.26E+04 (V) |
| 1419 X3P_ZT.468 | 3 | 6.94  | 66.7 | 6.06E+04 (V) |
| 1499 S4P_ZT_Ro  | 3 | 6.75  | 100  | 7.69E+04 (V) |
| 2235 X3P_ZT.258 | 2 | 5.21  | 65.7 | 2.82E+06 (R) |
| 938 S2P_ZT_Ro   | 3 | 8.6   | 61.7 | 4.62E+07 (R) |
| 956 S4P_ZT_Ro   | 3 | 8.54  | 61   | 3.82E+07 (R) |
| 1053 S3P_ZT_Ro  | 3 | 8.19  | 62.6 | 3.40E+07 (R) |
| 1057 L5P_ZT.328 | 3 | 8.16  | 62.7 | 1.59E+07 (R) |
| 1461 S5P_ZT_Ro  | 3 | 6.83  | 66.2 | 4.51E+07 (R) |
| 1494 X3P_ZT.314 | 3 | 6.76  | 67   | 2.92E+07 (R) |
| 1506 L4P_ZT.318 | 3 | 6.74  | 67.8 | 5.93E+06 (R) |
| 1174 L2P_ZT.518 | 5 | 7.75  | 66.7 | 8.76E+04 (K) |
| 1789 X2P_ZT.528 | 7 | 6.09  | 78.1 | 5.71E+04 (K) |
| 2213 X4P_ZT.378 | 2 | 5.23  | 62.6 | 8.53E+04 (K) |
| 1151 S5P_ZT_Ro  | 3 | 7.84  | 72.9 | 9.70E+06 (H) |
| 1508 L4P_ZT.488 | 3 | 6.74  | 64.5 | 8.86E+05 (H) |
| 1645 X1P_ZT.488 | 3 | 6.42  | 100  | 1.18E+06 (H) |
| 1783 S4P_ZT_Ro  | 3 | 6.1   | 91.6 | 1.23E+07 (H) |
| 1498 S4P_ZT_Ro  | 3 | 6.75  | 61.5 | 8.57E+04 (H) |
| 1933 S2P_ZT_Ro  | 2 | 5.74  | 79.2 | 4.99E+05 (R) |
| 2183 X3P_ZT.374 | 4 | 5.27  | 64.3 | 2.55E+04 (R) |
| 1596 S3P_ZT_Ro  | 4 | 6.52  | 60.8 | 2.35E+05 (K) |
| 1 S3P_ZT_Ro     | 2 | 25.6  | 97.1 | 7.39E+06 (K) |
| 2 S1P_ZT_Ro     | 2 | 25.22 | 92.8 | 1.00E+07 (K) |
| 3 S2P_ZT_Ro     | 2 | 23.15 | 96.2 | 1.50E+07 (K) |
| 4 X3P_ZT.558    | 2 | 22.01 | 91.6 | 4.43E+06 (K) |
| 5 S5P_ZT_Ro     | 2 | 21.12 | 88.6 | 6.80E+06 (K) |
| 25 L3P_ZT.614   | 3 | 19.26 | 89.7 | 3.57E+07 (K) |
| 32 S4P_ZT_Ro    | 2 | 18.73 | 80.3 | 2.38E+07 (K) |
| 35 L3P_ZT.638   | 2 | 18.4  | 87.8 | 1.31E+07 (K) |
| 47 S1P_ZT_Ro    | 3 | 17.64 | 83.6 | 2.72E+07 (K) |
| 54 X4P_ZT.558   | 2 | 17.24 | 85.6 | 7.45E+06 (K) |
| 62 S2P_ZT_Ro    | 3 | 16.83 | 80.7 | 4.48E+07 (K) |
| 68 S3P_ZT_Ro    | 3 | 16.51 | 85.3 | 1.81E+07 (K) |
| 69 X5P_ZT.548   | 2 | 16.48 | 88.8 | 4.44E+05 (K) |
| 70 L3P_ZT.680   | 2 | 16.45 | 70.7 | 1.31E+07 (K) |
| 87 L5P_ZT.634   | 2 | 15.81 | 80.6 | 6.66E+04 (K) |
| 100 S4P_ZT_Ro   | 2 | 15.48 | 86.2 | 2.38E+07 (K) |
| 144 S1P_ZT_Ro   | 2 | 14.77 | 66.3 | 1.00E+07 (K) |
| 154 S3P_ZT_Ro   | 3 | 14.58 | 71.6 | 1.81E+07 (K) |
| 235 X4P_ZT.558  | 3 | 13.48 | 64   | 1.66E+07 (K) |
| 273 X4P_ZT.618  | 2 | 12.97 | 61.4 | 7.45E+06 (K) |
| 292 L4P_ZT.712  | 2 | 12.71 | 70   | 3.55E+05 (K) |
| 360 X4P_ZT.574  | 2 | 12.16 | 68.7 | 7.45E+06 (K) |

|                |   |       |      |              |
|----------------|---|-------|------|--------------|
| 472 X5P_ZT.54  | 3 | 11.32 | 66   | 1.51E+06 (K) |
| 735 S1P_ZT_Ro  | 2 | 9.58  | 69.7 | 1.00E+07 (K) |
| 770 X1P_ZT.71  | 3 | 9.4   | 84.1 | 8.33E+06 (K) |
| 1196 L3P_ZT.66 | 3 | 7.68  | 69   | 3.57E+07 (K) |
| 1233 S1P_ZT_Ro | 3 | 7.55  | 62.1 | 2.72E+07 (K) |
| 1178 S4P_ZT_Ro | 3 | 7.74  | 67.2 | 9.09E+04 (K) |
| 15 X2P_ZT.59   | 2 | 19.85 | 75.7 | 5.18E+05 (K) |
| 31 S2P_ZT_Ro   | 2 | 18.74 | 78.8 | 1.50E+07 (K) |
| 33 S4P_ZT_Ro   | 2 | 18.53 | 84   | 2.38E+07 (K) |
| 53 X3P_ZT.54   | 3 | 17.36 | 78   | 8.40E+06 (K) |
| 65 S5P_ZT_Ro   | 3 | 16.55 | 81   | 2.37E+07 (K) |
| 84 S4P_ZT_Ro   | 3 | 15.86 | 79.3 | 6.78E+07 (K) |
| 1155 S2P_ZT_Ro | 3 | 7.82  | 64.4 | 4.48E+07 (K) |
| 959 X3P_ZT.23  | 2 | 8.51  | 68.9 | 9.02E+05 (S) |
| 1418 L5P_ZT.43 | 3 | 6.95  | 71.2 | 8.01E+04 (K) |
| 824 S1P_ZT_Ro  | 2 | 9.09  | 63.7 | 1.25E+06 (S) |
| 2176 S1P_ZT_Ro | 2 | 5.29  | 85.4 | 5.25E+05 (R) |
| 119 S2P_ZT_Ro  | 2 | 15.05 | 85.4 | 1.31E+08 (R) |
| 134 S3P_ZT_Ro  | 2 | 14.88 | 83.3 | 9.36E+07 (R) |
| 135 S5P_ZT_Ro  | 2 | 14.86 | 83.7 | 2.72E+08 (R) |
| 143 S1P_ZT_Ro  | 2 | 14.77 | 82.2 | 1.48E+08 (R) |
| 172 S4P_ZT_Ro  | 2 | 14.27 | 80.7 | 2.95E+08 (R) |
| 178 L3P_ZT.16  | 2 | 14.19 | 80.6 | 1.69E+08 (R) |
| 228 X4P_ZT.15  | 2 | 13.57 | 78.9 | 2.84E+08 (R) |
| 296 X3P_ZT.15  | 2 | 12.69 | 79.2 | 1.35E+08 (R) |
| 387 S2P_ZT_Ro  | 2 | 11.86 | 76.1 | 1.24E+06 (R) |
| 500 X3P_ZT.12  | 2 | 11.07 | 68.3 | 5.82E+05 (R) |
| 550 X2P_ZT.16  | 2 | 10.74 | 75   | 7.46E+06 (R) |
| 634 S5P_ZT_Ro  | 2 | 10.08 | 65.7 | 9.07E+05 (R) |
| 645 S4P_ZT_Ro  | 2 | 10.01 | 62.4 | 1.57E+06 (R) |
| 661 S1P_ZT_Ro  | 2 | 9.95  | 73.6 | 1.34E+06 (R) |
| 830 X4P_ZT.12  | 2 | 9.06  | 66.6 | 1.02E+06 (R) |
| 846 L3P_ZT.12  | 2 | 9     | 62   | 9.07E+05 (R) |
| 1514 S3P_ZT_Ro | 2 | 6.72  | 77.4 | 4.76E+05 (R) |
| 1832 L1P_ZT.15 | 2 | 5.98  | 75.9 | 5.67E+06 (R) |
| 1634 X3P_ZT.23 | 3 | 6.45  | 100  | 6.29E+05 (K) |
| 1969 X2P_ZT.47 | 4 | 5.67  | 100  | 4.98E+04 (I) |
| 1878 S2P_ZT_Ro | 5 | 5.87  | 67.8 | 6.11E+04 (K) |
| 1144 S1P_ZT_Ro | 2 | 7.86  | 71.6 | 4.59E+04 (R) |
| 2154 L5P_ZT.82 | 3 | 5.33  | 83.8 | 4.16E+04 (R) |
| 2168 X3P_ZT.78 | 3 | 5.3   | 83.9 | 8.07E+04 (R) |
| 1746 S4P_ZT_Ro | 3 | 6.2   | 63.3 | 8.01E+04 (R) |
| 1034 L1P_ZT.48 | 3 | 8.27  | 79.8 | 5.07E+05 (R) |
| 1142 X4P_ZT.49 | 3 | 7.86  | 77.4 | 2.50E+05 (R) |
| 1454 L2P_ZT.47 | 3 | 6.85  | 66.4 | 2.88E+05 (R) |
| 1925 L3P_ZT.49 | 3 | 5.76  | 61.8 | 4.93E+05 (R) |
| 978 X5P_ZT.25  | 5 | 8.44  | 64.1 | 2.34E+05 (R) |

|                 |   |       |      |              |
|-----------------|---|-------|------|--------------|
| 71 X4P_ZT.560   | 2 | 16.42 | 72.9 | 1.03E+08 (F) |
| 79 S3P_ZT_Ro    | 2 | 16.13 | 81.3 | 1.64E+07 (F) |
| 97 S4P_ZT_Ro    | 2 | 15.55 | 81.6 | 3.23E+06 (F) |
| 98 L3P_ZT.637   | 2 | 15.55 | 80   | 1.41E+06 (F) |
| 261 S4P_ZT_Ro   | 2 | 13.13 | 72.5 | 8.44E+06 (F) |
| 263 S2P_ZT_Ro   | 2 | 13.11 | 79.7 | 1.26E+07 (F) |
| 275 S1P_ZT_Ro   | 2 | 12.92 | 76   | 2.60E+07 (F) |
| 312 S5P_ZT_Ro   | 2 | 12.58 | 80.9 | 8.66E+06 (F) |
| 318 X3P_ZT.560  | 2 | 12.54 | 71.9 | 4.16E+07 (F) |
| 485 L3P_ZT.650  | 2 | 11.21 | 68.5 | 1.41E+06 (F) |
| 813 S2P_ZT_Ro   | 2 | 9.13  | 62.3 | 3.10E+07 (F) |
| 157 L3P_ZT.805  | 2 | 14.57 | 88.4 | 4.40E+06 (P) |
| 307 X4P_ZT.705  | 2 | 12.59 | 85   | 3.95E+06 (P) |
| 532 S3P_ZT_Ro   | 2 | 10.84 | 71.2 | 3.91E+06 (P) |
| 654 S2P_ZT_Ro   | 2 | 9.98  | 66.3 | 4.97E+06 (P) |
| 687 S4P_ZT_Ro   | 2 | 9.79  | 62.2 | 4.56E+06 (P) |
| 868 S2P_ZT_Ro   | 2 | 8.92  | 61.3 | 7.53E+06 (S) |
| 1058 L1P_ZT.417 | 2 | 8.15  | 66.1 | 5.06E+06 (K) |
| 1438 X1P_ZT.395 | 2 | 6.89  | 62.9 | 2.81E+07 (K) |
| 1484 L3P_ZT.415 | 2 | 6.78  | 86.7 | 1.64E+06 (K) |
| 1600 L5P_ZT.445 | 2 | 6.52  | 75.5 | 5.39E+05 (K) |
| 1753 L4P_ZT.428 | 2 | 6.19  | 76.2 | 3.52E+04 (K) |
| 1767 X1P_ZT.416 | 2 | 6.14  | 61.2 | 5.92E+05 (K) |
| 1850 X3P_ZT.434 | 2 | 5.92  | 76.1 | 2.55E+06 (K) |
| 1857 L3P_ZT.460 | 2 | 5.92  | 100  | 1.84E+06 (K) |
| 1911 L3P_ZT.425 | 2 | 5.79  | 63.2 | 1.14E+07 (K) |
| 2020 L1P_ZT.415 | 2 | 5.59  | 64.3 | 8.65E+06 (K) |
| 2075 X3P_ZT.437 | 2 | 5.47  | 100  | 2.74E+05 (K) |
| 2138 L2P_ZT.395 | 2 | 5.36  | 92.6 | 2.28E+07 (K) |
| 2163 L5P_ZT.440 | 2 | 5.32  | 78.3 | 1.07E+06 (K) |
| 2179 X2P_ZT.420 | 2 | 5.28  | 70   | 7.95E+06 (K) |
| 2189 X1P_ZT.410 | 2 | 5.26  | 88.7 | 8.38E+05 (K) |
| 2194 L5P_ZT.437 | 2 | 5.26  | 90.6 | 2.06E+06 (K) |
| 2222 X5P_ZT.445 | 2 | 5.22  | 88.9 | 4.35E+05 (K) |
| 2226 X3P_ZT.454 | 2 | 5.22  | 100  | 2.98E+05 (K) |
| 2232 L2P_ZT.430 | 2 | 5.22  | 100  | 3.69E+04 (K) |
| 2233 L3P_ZT.465 | 2 | 5.22  | 100  | 5.69E+04 (K) |
| 2248 L1P_ZT.418 | 2 | 5.2   | 80.3 | 3.84E+06 (K) |
| 2255 X1P_ZT.415 | 2 | 5.17  | 78   | 8.36E+04 (K) |
| 2296 L4P_ZT.427 | 2 | 5.09  | 85.6 | 3.52E+04 (K) |
| 109 S5P_ZT_Ro   | 2 | 15.32 | 87.9 | 5.92E+06 (S) |
| 118 X3P_ZT.359  | 2 | 15.07 | 88.4 | 3.03E+06 (S) |
| 141 X4P_ZT.360  | 2 | 14.8  | 91.6 | 7.84E+06 (S) |
| 150 S4P_ZT_Ro   | 2 | 14.62 | 87   | 8.26E+06 (S) |
| 186 L3P_ZT.532  | 2 | 14.09 | 68.4 | 6.43E+04 (S) |
| 257 L3P_ZT.360  | 2 | 13.21 | 86.9 | 4.39E+06 (S) |
| 328 S4P_ZT_Ro   | 2 | 12.45 | 86.4 | 1.01E+05 (S) |

|      |            |   |       |      |              |
|------|------------|---|-------|------|--------------|
| 339  | S5P_ZT_Ro  | 2 | 12.37 | 80.7 | 8.26E+04 (S) |
| 342  | S1P_ZT_Ro  | 2 | 12.36 | 91.3 | 6.70E+06 (S) |
| 356  | S1P_ZT_Ro  | 2 | 12.2  | 79.9 | 6.70E+06 (S) |
| 468  | S4P_ZT_Ro  | 2 | 11.34 | 74.6 | 8.26E+06 (S) |
| 525  | S3P_ZT_Ro  | 2 | 10.88 | 72.6 | 2.57E+06 (S) |
| 553  | S3P_ZT_Ro  | 2 | 10.71 | 63.7 | 6.56E+04 (S) |
| 569  | S1P_ZT_Ro  | 2 | 10.56 | 90.6 | 3.32E+04 (S) |
| 648  | L3P_ZT.359 | 2 | 10.01 | 68.9 | 4.36E+06 (S) |
| 651  | S2P_ZT_Ro  | 2 | 9.99  | 92.2 | 5.22E+04 (S) |
| 681  | S2P_ZT_Ro  | 2 | 9.82  | 62.1 | 2.38E+06 (S) |
| 1237 | L1P_ZT.386 | 2 | 7.53  | 60.9 | 4.94E+07 (S) |
| 385  | X3P_ZT.128 | 2 | 11.86 | 88.6 | 2.20E+07 (R) |
| 386  | S5P_ZT_Ro  | 2 | 11.86 | 89   | 2.03E+07 (R) |
| 400  | S2P_ZT_Ro  | 2 | 11.8  | 86   | 1.99E+07 (R) |
| 401  | S1P_ZT_Ro  | 2 | 11.8  | 86.6 | 2.17E+07 (R) |
| 406  | X4P_ZT.129 | 2 | 11.76 | 84.9 | 1.98E+07 (R) |
| 475  | L3P_ZT.134 | 2 | 11.29 | 85.6 | 2.03E+07 (R) |
| 476  | S4P_ZT_Ro  | 2 | 11.28 | 84.8 | 1.84E+07 (R) |
| 503  | S3P_ZT_Ro  | 2 | 11.02 | 94.9 | 2.09E+07 (R) |
| 507  | S5P_ZT_Ro  | 2 | 11    | 77.2 | 2.03E+07 (R) |
| 520  | X1P_ZT.137 | 2 | 10.91 | 83.5 | 9.12E+05 (R) |
| 526  | S4P_ZT_Ro  | 2 | 10.87 | 77.4 | 1.84E+07 (R) |
| 528  | S3P_ZT_Ro  | 2 | 10.86 | 88   | 2.14E+07 (R) |
| 665  | X2P_ZT.139 | 2 | 9.93  | 78   | 1.23E+06 (R) |
| 973  | S2P_ZT_Ro  | 2 | 8.47  | 64   | 1.99E+07 (R) |
| 989  | S1P_ZT_Ro  | 2 | 8.42  | 73.8 | 2.17E+07 (R) |
| 1087 | X4P_ZT.127 | 2 | 8.06  | 70.9 | 1.98E+07 (R) |
| 1138 | X5P_ZT.130 | 2 | 7.87  | 66.1 | 5.83E+05 (R) |
| 1156 | L3P_ZT.139 | 2 | 7.82  | 63.4 | 2.03E+07 (R) |
| 1958 | L2P_ZT.328 | 2 | 5.71  | 86   | 3.56E+05 (R) |
| 1955 | X3P_ZT.478 | 3 | 5.71  | 61.7 | 1.73E+06 (K) |
| 362  | S4P_ZT_Ro  | 2 | 12.14 | 73.2 | 4.96E+07 (R) |
| 451  | X4P_ZT.527 | 2 | 11.44 | 68.2 | 1.32E+08 (R) |
| 461  | X3P_ZT.549 | 2 | 11.38 | 72.2 | 3.94E+07 (R) |
| 499  | S1P_ZT_Ro  | 2 | 11.08 | 69.7 | 2.82E+07 (R) |
| 596  | L3P_ZT.607 | 2 | 10.37 | 67.5 | 7.74E+07 (R) |
| 611  | S2P_ZT_Ro  | 2 | 10.25 | 66.5 | 2.55E+07 (R) |
| 630  | S3P_ZT_Ro  | 2 | 10.15 | 70.7 | 4.40E+07 (R) |
| 751  | S5P_ZT_Ro  | 2 | 9.48  | 63.9 | 5.11E+07 (R) |
| 756  | L3P_ZT.718 | 2 | 9.46  | 74.9 | 6.99E+05 (R) |
| 1185 | X5P_ZT.530 | 2 | 7.72  | 68.4 | 1.25E+06 (R) |
| 1954 | X4P_ZT.639 | 2 | 5.71  | 80.7 | 1.83E+07 (R) |
| 517  | S4P_ZT_Ro  | 2 | 10.93 | 62.3 | 2.79E+06 (R) |
| 659  | S3P_ZT_Ro  | 2 | 9.96  | 67.5 | 3.15E+06 (R) |
| 750  | S1P_ZT_Ro  | 2 | 9.49  | 62.5 | 3.71E+06 (R) |
| 850  | S2P_ZT_Ro  | 2 | 8.99  | 62.3 | 4.89E+06 (R) |
| 1104 | S2P_ZT_Ro  | 2 | 8.02  | 85.6 | 4.89E+06 (R) |

|      |            |   |       |      |              |
|------|------------|---|-------|------|--------------|
| 1116 | S1P_ZT_Ro  | 2 | 7.97  | 62.6 | 3.71E+06 (R) |
| 1678 | X4P_ZT.48: | 2 | 6.33  | 64.9 | 1.96E+05 (R) |
| 847  | X4P_ZT.32( | 6 | 8.99  | 68.2 | 2.10E+06 (R) |
| 1559 | L4P_ZT.32: | 5 | 6.63  | 78.3 | 3.78E+05 (R) |
| 2257 | L4P_ZT.317 | 5 | 5.17  | 100  | 3.78E+05 (R) |
| 1146 | S1P_ZT_Ro  | 3 | 7.86  | 65   | 3.00E+04 (R) |
| 6    | S3P_ZT_Ro  | 2 | 21.11 | 97.3 | 1.12E+08 (R) |
| 20   | L3P_ZT.104 | 2 | 19.52 | 95.6 | 3.51E+08 (R) |
| 21   | X4P_ZT.97: | 2 | 19.45 | 92.7 | 2.37E+08 (R) |
| 24   | S1P_ZT_Ro  | 2 | 19.28 | 96.7 | 2.12E+08 (R) |
| 26   | S5P_ZT_Ro  | 2 | 19.23 | 95.2 | 1.90E+08 (R) |
| 27   | S4P_ZT_Ro  | 2 | 19.19 | 93.5 | 2.24E+08 (R) |
| 36   | X3P_ZT.98: | 2 | 18.36 | 90.4 | 1.90E+08 (R) |
| 42   | S2P_ZT_Ro  | 2 | 17.91 | 92.9 | 1.28E+08 (R) |
| 313  | L5P_ZT.11( | 2 | 12.58 | 83.7 | 3.71E+06 (R) |
| 337  | X2P_ZT.10: | 2 | 12.39 | 72.4 | 7.06E+06 (R) |
| 365  | S1P_ZT_Ro  | 2 | 12.1  | 64.7 | 2.12E+08 (R) |
| 471  | L4P_ZT.12( | 2 | 11.33 | 79.9 | 4.44E+06 (R) |
| 587  | S5P_ZT_Ro  | 2 | 10.4  | 60.7 | 1.90E+08 (R) |
| 603  | S4P_ZT_Ro  | 2 | 10.31 | 71.4 | 2.24E+08 (R) |
| 728  | S2P_ZT_Ro  | 2 | 9.59  | 86.6 | 1.28E+08 (R) |
| 767  | X1P_ZT.11: | 2 | 9.41  | 73.1 | 5.72E+06 (R) |
| 833  | L1P_ZT.104 | 2 | 9.06  | 72.2 | 9.06E+06 (R) |
| 855  | S2P_ZT_Ro  | 2 | 8.97  | 60.2 | 1.28E+08 (R) |
| 1056 | L1P_ZT.105 | 2 | 8.17  | 68.8 | 9.06E+06 (R) |
| 116  | S2P_ZT_Ro  | 3 | 15.17 | 100  | 6.52E+04 (R) |
| 180  | S3P_ZT_Ro  | 3 | 14.14 | 61.4 | 2.80E+06 (R) |
| 202  | S4P_ZT_Ro  | 3 | 13.89 | 63.6 | 3.69E+06 (R) |
| 203  | S2P_ZT_Ro  | 3 | 13.89 | 63.8 | 3.80E+06 (R) |
| 264  | S5P_ZT_Ro  | 3 | 13.1  | 60.7 | 3.35E+06 (R) |
| 274  | L3P_ZT.248 | 3 | 12.95 | 67.1 | 1.80E+06 (R) |
| 695  | X4P_ZT.25: | 3 | 9.76  | 63.5 | 1.60E+06 (R) |
| 1028 | S1P_ZT_Ro  | 2 | 8.28  | 68.8 | 9.26E+05 (R) |
| 1260 | L3P_ZT.247 | 2 | 7.45  | 60.5 | 3.96E+05 (R) |
| 1984 | X2P_ZT.47: | 3 | 5.65  | 61.7 | 3.10E+05 (R) |
| 1816 | X5P_ZT.354 | 5 | 6.02  | 64.4 | 1.27E+05 (R) |
| 1341 | X5P_ZT.21: | 4 | 7.16  | 63.2 | 3.03E+06 (R) |
| 1646 | S2P_ZT_Ro  | 4 | 6.42  | 62.6 | 5.93E+05 (R) |
| 2023 | L5P_ZT.219 | 4 | 5.59  | 64.8 | 2.18E+06 (R) |
| 2153 | S1P_ZT_Ro  | 4 | 5.33  | 63.7 | 1.37E+06 (R) |
| 2029 | L1P_ZT.485 | 5 | 5.57  | 72.3 | 1.97E+04 (R) |
| 2098 | S2P_ZT_Ro  | 6 | 5.44  | 71.8 | 2.86E+05 (R) |
| 1316 | S1P_ZT_Ro  | 3 | 7.26  | 66.1 | 4.54E+06 (R) |
| 1576 | L4P_ZT.116 | 3 | 6.58  | 100  | 8.47E+06 (R) |
| 1616 | L3P_ZT.114 | 3 | 6.48  | 73.5 | 3.26E+05 (R) |
| 1705 | X2P_ZT.10: | 3 | 6.28  | 100  | 1.33E+06 (R) |
| 1758 | X2P_ZT.10( | 3 | 6.17  | 100  | 1.33E+06 (R) |



|                 |   |       |      |              |
|-----------------|---|-------|------|--------------|
| 1995 L1P_ZT.101 | 3 | 5.64  | 87.3 | 1.07E+07 (R) |
| 1452 X3P_ZT.249 | 3 | 6.85  | 61.9 | 2.32E+06 (R) |
| 974 S2P_ZT_Ro   | 6 | 8.47  | 73.2 | 4.82E+04 (R) |
| 1966 S2P_ZT_Ro  | 6 | 5.68  | 72.3 | 3.16E+04 (R) |
| 1141 S1P_ZT_Ro  | 6 | 7.87  | 66.5 | 5.04E+04 (R) |
| 1189 L1P_ZT.220 | 2 | 7.71  | 65.3 | 1.05E+06 (G) |
| 1551 X3P_ZT.368 | 6 | 6.64  | 71.3 | 2.26E+04 (R) |
| 1659 X2P_ZT.376 | 6 | 6.37  | 67.3 | 1.08E+06 (R) |
| 2043 S1P_ZT_Ro  | 6 | 5.54  | 77.4 | 1.27E+06 (R) |
| 2040 X2P_ZT.514 | 2 | 5.54  | 71.7 | 3.30E+04 (R) |
| 558 L3P_ZT.269  | 2 | 10.66 | 60.9 | 1.44E+08 (R) |
| 578 S4P_ZT_Ro   | 2 | 10.46 | 62.2 | 1.75E+08 (R) |
| 624 L1P_ZT.236  | 2 | 10.17 | 63   | 3.73E+06 (R) |
| 625 X2P_ZT.289  | 2 | 10.16 | 62.9 | 7.57E+06 (R) |
| 680 S5P_ZT_Ro   | 2 | 9.83  | 62.7 | 3.21E+07 (R) |
| 684 S3P_ZT_Ro   | 2 | 9.8   | 61.9 | 4.39E+07 (R) |
| 696 X4P_ZT.253  | 2 | 9.76  | 61.1 | 1.37E+08 (R) |
| 715 S2P_ZT_Ro   | 2 | 9.67  | 66.7 | 4.99E+07 (R) |
| 720 L1P_ZT.258  | 2 | 9.65  | 65.2 | 4.45E+06 (R) |
| 762 S4P_ZT_Ro   | 2 | 9.43  | 61.4 | 5.20E+07 (R) |
| 775 S1P_ZT_Ro   | 2 | 9.37  | 60.9 | 6.26E+07 (R) |
| 803 X2P_ZT.264  | 2 | 9.18  | 68.3 | 3.99E+06 (R) |
| 811 L3P_ZT.249  | 2 | 9.15  | 61.3 | 6.07E+07 (R) |
| 887 X4P_ZT.271  | 2 | 8.84  | 62   | 1.37E+08 (R) |
| 915 S5P_ZT_Ro   | 2 | 8.72  | 100  | 3.21E+07 (R) |
| 1046 S2P_ZT_Ro  | 2 | 8.22  | 87.6 | 3.28E+05 (R) |
| 1072 L1P_ZT.258 | 2 | 8.11  | 86.8 | 4.45E+06 (R) |
| 1119 L1P_ZT.255 | 2 | 7.96  | 70   | 4.45E+06 (R) |
| 1175 L3P_ZT.268 | 2 | 7.75  | 61.5 | 1.44E+08 (R) |
| 1197 X1P_ZT.260 | 2 | 7.67  | 82.9 | 2.87E+06 (R) |
| 1268 L2P_ZT.237 | 2 | 7.44  | 68.6 | 5.54E+05 (R) |
| 1360 X3P_ZT.271 | 2 | 7.11  | 85.6 | 1.24E+08 (R) |
| 1388 L1P_ZT.256 | 2 | 7.01  | 66.3 | 4.45E+06 (R) |
| 1394 S3P_ZT_Ro  | 2 | 7     | 100  | 1.28E+08 (R) |
| 1521 L4P_ZT.263 | 2 | 6.71  | 85.1 | 7.27E+05 (R) |
| 1639 S3P_ZT_Ro  | 2 | 6.43  | 64.3 | 4.39E+07 (R) |
| 1800 X4P_ZT.184 | 2 | 6.06  | 78.3 | 3.78E+06 (R) |
| 1823 S1P_ZT_Ro  | 2 | 6     | 75.7 | 6.26E+07 (R) |
| 1935 L2P_ZT.253 | 2 | 5.74  | 68.6 | 1.76E+06 (R) |
| 1949 L2P_ZT.238 | 2 | 5.72  | 100  | 5.54E+05 (R) |
| 1951 L3P_ZT.287 | 2 | 5.72  | 100  | 1.51E+05 (R) |
| 1978 L4P_ZT.282 | 2 | 5.66  | 81.2 | 1.50E+06 (R) |
| 2033 L1P_ZT.292 | 4 | 5.56  | 67   | 4.02E+05 (K) |
| 1364 X3P_ZT.364 | 7 | 7.09  | 60.6 | 4.99E+04 (K) |
| 371 S4P_ZT_Ro   | 3 | 11.99 | 81.2 | 4.46E+06 (N) |
| 664 X4P_ZT.174  | 2 | 9.93  | 76.2 | 3.51E+05 (N) |
| 675 S1P_ZT_Ro   | 3 | 9.88  | 89.2 | 1.81E+06 (N) |

|                 |   |       |      |              |
|-----------------|---|-------|------|--------------|
| 783 S2P_ZT_Ro   | 3 | 9.31  | 79.4 | 2.48E+06 (N) |
| 822 L3P_ZT.177  | 3 | 9.1   | 76.4 | 1.00E+07 (N) |
| 921 L3P_ZT.179  | 2 | 8.7   | 75.2 | 2.06E+06 (N) |
| 1183 S3P_ZT_Ro  | 3 | 7.73  | 62   | 1.71E+06 (N) |
| 1198 S3P_ZT_Ro  | 3 | 7.67  | 65.2 | 1.71E+06 (N) |
| 1478 X4P_ZT.177 | 3 | 6.78  | 67.3 | 2.03E+06 (N) |
| 1530 L3P_ZT.182 | 3 | 6.69  | 87.2 | 1.03E+07 (N) |
| 1643 X3P_ZT.786 | 4 | 6.42  | 100  | 3.90E+05 (N) |
| 367 L3P_ZT.138  | 4 | 12.08 | 81   | 2.01E+06 (N) |
| 484 S4P_ZT_Ro   | 4 | 11.21 | 76   | 2.11E+06 (N) |
| 600 S4P_ZT_Ro   | 2 | 10.33 | 83.1 | 2.42E+05 (N) |
| 633 S2P_ZT_Ro   | 4 | 10.09 | 82.3 | 2.50E+06 (N) |
| 700 S5P_ZT_Ro   | 2 | 9.74  | 78.7 | 2.64E+05 (N) |
| 706 S1P_ZT_Ro   | 2 | 9.71  | 81.4 | 2.62E+05 (N) |
| 718 X4P_ZT.137  | 2 | 9.65  | 69   | 3.95E+05 (N) |
| 764 S2P_ZT_Ro   | 3 | 9.43  | 69   | 1.74E+06 (N) |
| 842 S1P_ZT_Ro   | 4 | 9.02  | 69.8 | 2.12E+06 (N) |
| 843 S2P_ZT_Ro   | 2 | 9.01  | 91.7 | 2.80E+05 (N) |
| 948 L3P_ZT.136  | 4 | 8.58  | 62.8 | 2.01E+06 (N) |
| 957 S1P_ZT_Ro   | 2 | 8.53  | 73.3 | 2.62E+05 (N) |
| 981 S5P_ZT_Ro   | 4 | 8.44  | 63.3 | 2.57E+06 (N) |
| 1018 S3P_ZT_Ro  | 4 | 8.32  | 66.9 | 1.64E+06 (N) |
| 1121 S5P_ZT_Ro  | 3 | 7.95  | 66.8 | 1.82E+06 (N) |
| 1186 X3P_ZT.128 | 4 | 7.72  | 60.1 | 3.69E+06 (N) |
| 1218 X3P_ZT.137 | 2 | 7.58  | 70.9 | 4.63E+05 (N) |
| 1266 S2P_ZT_Ro  | 4 | 7.44  | 60.3 | 2.50E+06 (N) |
| 1273 S4P_ZT_Ro  | 3 | 7.42  | 100  | 1.57E+06 (N) |
| 1357 S1P_ZT_Ro  | 4 | 7.12  | 100  | 2.12E+06 (N) |
| 1358 L3P_ZT.138 | 3 | 7.12  | 100  | 1.47E+06 (N) |
| 691 S4P_ZT_Ro   | 4 | 9.77  | 62.8 | 1.18E+06 (E) |
| 953 L5P_ZT.482  | 4 | 8.55  | 68.3 | 1.23E+06 (E) |
| 1397 X4P_ZT.479 | 4 | 6.99  | 82.8 | 1.23E+06 (E) |
| 1672 X2P_ZT.487 | 4 | 6.34  | 89   | 1.51E+06 (E) |
| 1703 X4P_ZT.507 | 4 | 6.28  | 83.6 | 1.19E+05 (K) |
| 2048 X2P_ZT.269 | 2 | 5.53  | 76.5 | 1.05E+05 (R) |
| 1996 S2P_ZT_Ro  | 4 | 5.63  | 75.3 | 1.46E+06 (R) |
| 1806 X3P_ZT.363 | 7 | 6.05  | 68.6 | 1.80E+05 (N) |
| 2034 L3P_ZT.359 | 7 | 5.56  | 75   | 1.93E+05 (N) |
| 1583 X4P_ZT.150 | 3 | 6.56  | 74.3 | 1.12E+05 (T) |
| 1618 L5P_ZT.463 | 5 | 6.48  | 64.7 | 7.96E+04 (L) |
| 752 L4P_ZT.250  | 2 | 9.48  | 68.3 | 4.83E+06 (K) |
| 776 X1P_ZT.229  | 2 | 9.36  | 74.8 | 2.69E+07 (K) |
| 815 X2P_ZT.247  | 2 | 9.12  | 70.7 | 1.02E+07 (K) |
| 874 S2P_ZT_Ro   | 2 | 8.89  | 69.4 | 9.94E+06 (K) |
| 910 S1P_ZT_Ro   | 2 | 8.74  | 77.9 | 1.59E+07 (K) |
| 949 L5P_ZT.244  | 2 | 8.58  | 73.5 | 1.00E+07 (K) |
| 969 S5P_ZT_Ro   | 2 | 8.48  | 74.3 | 1.47E+07 (K) |

|                 |   |      |      |              |
|-----------------|---|------|------|--------------|
| 976 S4P_ZT_Ro   | 2 | 8.45 | 69.8 | 1.05E+07 (K) |
| 1098 X3P_ZT.236 | 2 | 8.03 | 80.3 | 2.43E+07 (K) |
| 1152 X2P_ZT.246 | 2 | 7.83 | 72.8 | 1.02E+07 (K) |
| 1169 L1P_ZT.220 | 2 | 7.77 | 69.9 | 1.01E+07 (K) |
| 1173 S3P_ZT_Ro  | 2 | 7.75 | 71.7 | 9.02E+06 (K) |
| 1369 X4P_ZT.239 | 2 | 7.07 | 72.3 | 5.05E+06 (K) |
| 1464 L2P_ZT.221 | 2 | 6.83 | 66.9 | 8.79E+06 (K) |
| 1737 L3P_ZT.236 | 2 | 6.22 | 71   | 1.23E+07 (K) |
| 1815 X5P_ZT.241 | 2 | 6.02 | 70.3 | 1.06E+07 (K) |
| 1837 L4P_ZT.248 | 2 | 5.96 | 64.7 | 8.62E+06 (K) |
| 2197 X1P_ZT.239 | 2 | 5.25 | 62.1 | 1.31E+07 (K) |
| 2185 L4P_ZT.264 | 2 | 5.27 | 68.7 | 1.02E+06 (K) |
| 1113 S1P_ZT_Ro  | 2 | 7.98 | 77.6 | 1.01E+06 (K) |
| 1279 X3P_ZT.291 | 3 | 7.39 | 82.4 | 9.13E+05 (K) |
| 1346 S4P_ZT_Ro  | 2 | 7.15 | 60.7 | 7.64E+05 (K) |
| 1653 S4P_ZT_Ro  | 2 | 6.4  | 60.3 | 7.64E+05 (K) |
| 1749 L5P_ZT.300 | 3 | 6.2  | 100  | 1.25E+06 (K) |
| 1774 X1P_ZT.280 | 3 | 6.13 | 78.1 | 4.76E+05 (K) |
| 1897 S1P_ZT_Ro  | 2 | 5.82 | 80.2 | 9.54E+05 (K) |
| 2054 L5P_ZT.309 | 3 | 5.53 | 65.4 | 1.51E+06 (K) |
| 2104 L5P_ZT.298 | 3 | 5.42 | 63.1 | 1.25E+06 (K) |
| 2186 L5P_ZT.304 | 3 | 5.27 | 65.4 | 1.25E+06 (K) |
| 2302 X3P_ZT.321 | 2 | 5.06 | 92.3 | 3.19E+05 (K) |
| 1593 S3P_ZT_Ro  | 2 | 6.54 | 67.9 | 3.12E+06 (K) |
| 2322 L4P_ZT.264 | 2 | 5.02 | 75.6 | 1.13E+06 (K) |
| 2047 X3P_ZT.179 | 2 | 5.53 | 62.3 | 2.24E+05 (K) |
| 1495 X4P_ZT.508 | 3 | 6.75 | 100  | 6.41E+04 (L) |
| 858 L3P_ZT.174  | 2 | 8.96 | 77.3 | 1.21E+06 (N) |
| 1097 X5P_ZT.173 | 2 | 8.03 | 64.5 | 3.41E+05 (N) |
| 902 L1P_ZT.799  | 2 | 8.77 | 77.4 | 1.01E+05 (K) |
| 1404 L1P_ZT.797 | 3 | 6.98 | 70.8 | 1.69E+05 (K) |
| 2058 X1P_ZT.869 | 3 | 5.51 | 70.1 | 5.91E+05 (K) |
| 1826 L3P_ZT.511 | 3 | 6    | 62   | 7.17E+06 (K) |
| 1906 X4P_ZT.263 | 4 | 5.79 | 63.5 | 4.12E+04 (K) |
| 1368 S2P_ZT_Ro  | 5 | 7.08 | 64.7 | 4.81E+04 (Y) |
| 798 S1P_ZT_Ro   | 3 | 9.22 | 70.5 | 1.54E+05 (Y) |
| 1931 S1P_ZT_Ro  | 3 | 5.75 | 68   | 3.82E+04 (K) |
| 2147 S1P_ZT_Ro  | 3 | 5.34 | 69.1 | 5.02E+05 (K) |
| 1238 X4P_ZT.291 | 3 | 7.52 | 69.5 | 2.68E+04 (G) |
| 1453 X3P_ZT.289 | 3 | 6.85 | 62.5 | 2.17E+05 (G) |
| 1765 S4P_ZT_Ro  | 3 | 6.15 | 61.8 | 4.27E+05 (G) |
| 1081 X5P_ZT.826 | 3 | 8.07 | 68.2 | 3.16E+04 (R) |
| 1247 X4P_ZT.161 | 3 | 7.49 | 67.8 | 3.72E+04 (R) |
| 1824 S1P_ZT_Ro  | 3 | 6    | 74.9 | 2.06E+06 (K) |
| 1876 X5P_ZT.359 | 4 | 5.87 | 64.4 | 4.51E+05 (F) |
| 1242 L2P_ZT.269 | 3 | 7.51 | 75   | 1.40E+06 (C) |
| 1512 X3P_ZT.270 | 3 | 6.72 | 74.8 | 1.08E+06 (C) |

|      |            |   |      |      |              |
|------|------------|---|------|------|--------------|
| 1588 | L3P_ZT.269 | 3 | 6.55 | 68.3 | 1.45E+06 (C) |
| 1724 | S4P_ZT_Ro  | 3 | 6.24 | 74.4 | 2.00E+06 (C) |
| 1527 | L2P_ZT.477 | 3 | 6.7  | 60.6 | 3.33E+05 (L) |
| 1686 | S4P_ZT_Ro  | 3 | 6.31 | 75.2 | 2.61E+05 (L) |
| 1182 | S5P_ZT_Ro  | 4 | 7.73 | 72.1 | 3.29E+06 (K) |
| 1324 | L1P_ZT.205 | 2 | 7.23 | 62.8 | 5.84E+05 (K) |
| 1960 | L5P_ZT.228 | 3 | 5.71 | 68   | 1.28E+05 (K) |
| 1200 | L5P_ZT.533 | 4 | 7.67 | 80.2 | 7.48E+05 (K) |
| 1642 | X3P_ZT.557 | 4 | 6.42 | 62   | 9.73E+05 (K) |
| 1791 | L1P_ZT.417 | 4 | 6.09 | 72.3 | 1.94E+06 (K) |
| 1862 | L3P_ZT.537 | 4 | 5.91 | 70   | 1.16E+06 (K) |
| 2208 | X1P_ZT.266 | 5 | 5.24 | 61.2 | 5.62E+05 (K) |
| 1093 | S2P_ZT_Ro  | 3 | 8.05 | 61.2 | 3.11E+05 (K) |
| 1716 | X1P_ZT.280 | 3 | 6.25 | 60.1 | 2.70E+05 (K) |
| 1944 | X1P_ZT.283 | 3 | 5.72 | 78.4 | 2.70E+05 (K) |
| 1102 | S5P_ZT_Ro  | 3 | 8.02 | 72.2 | 1.62E+05 (K) |
| 1700 | S1P_ZT_Ro  | 3 | 6.29 | 77   | 2.87E+05 (K) |
| 1896 | S2P_ZT_Ro  | 3 | 5.82 | 75.7 | 2.09E+05 (K) |
| 2221 | L5P_ZT.488 | 3 | 5.23 | 71.4 | 2.61E+05 (K) |
| 2250 | L5P_ZT.489 | 3 | 5.2  | 69.6 | 2.61E+05 (K) |
| 2171 | L1P_ZT.494 | 3 | 5.3  | 61.6 | 1.91E+05 (K) |
| 1132 | S3P_ZT_Ro  | 3 | 7.9  | 61.3 | 1.27E+06 (K) |
| 1509 | X1P_ZT.293 | 3 | 6.73 | 68.5 | 1.00E+06 (K) |
| 1689 | S4P_ZT_Ro  | 3 | 6.3  | 60.1 | 1.51E+06 (K) |
| 1846 | S5P_ZT_Ro  | 3 | 5.93 | 75.9 | 1.14E+06 (K) |
| 1100 | X5P_ZT.320 | 5 | 8.02 | 62.6 | 9.31E+05 (K) |
| 1623 | S1P_ZT_Ro  | 3 | 6.47 | 66.3 | 1.52E+04 (K) |
| 1722 | L5P_ZT.320 | 5 | 6.25 | 73.9 | 2.46E+06 (K) |
| 1868 | S2P_ZT_Ro  | 4 | 5.9  | 65.2 | 2.62E+06 (K) |
| 1895 | X2P_ZT.323 | 5 | 5.82 | 77.8 | 1.53E+06 (K) |
| 1932 | S3P_ZT_Ro  | 3 | 5.74 | 62.2 | 2.01E+05 (K) |
| 2079 | S5P_ZT_Ro  | 3 | 5.47 | 63.4 | 7.86E+04 (K) |
| 2234 | L4P_ZT.282 | 5 | 5.22 | 60.8 | 5.34E+04 (K) |
| 1337 | L3P_ZT.299 | 6 | 7.19 | 61   | 5.76E+04 (K) |
| 2318 | L5P_ZT.377 | 4 | 5.03 | 61.7 | 9.18E+04 (K) |
| 1577 | L4P_ZT.189 | 3 | 6.58 | 69.3 | 5.37E+04 (C) |
| 1339 | X4P_ZT.464 | 4 | 7.17 | 88.5 | 4.29E+06 (L) |
| 2315 | X3P_ZT.317 | 2 | 5.03 | 61.4 | 4.36E+05 (K) |
| 2105 | L5P_ZT.445 | 3 | 5.42 | 75.5 | 2.83E+05 (K) |
| 1507 | L4P_ZT.380 | 4 | 6.74 | 63.9 | 1.83E+04 (K) |
| 1872 | S4P_ZT_Ro  | 4 | 5.89 | 79   | 1.81E+05 (K) |
| 2101 | S1P_ZT_Ro  | 4 | 5.43 | 73.1 | 3.94E+05 (K) |
| 2243 | L3P_ZT.525 | 4 | 5.21 | 62.2 | 8.30E+04 (K) |
| 1885 | X3P_ZT.467 | 5 | 5.84 | 62   | 1.28E+05 (K) |
| 1680 | S2P_ZT_Ro  | 3 | 6.32 | 76.5 | 1.27E+04 (K) |
| 871  | X3P_ZT.344 | 5 | 8.89 | 66.2 | 5.94E+05 (K) |
| 1039 | L3P_ZT.535 | 4 | 8.26 | 63.2 | 7.11E+05 (K) |

|      |            |   |      |      |              |
|------|------------|---|------|------|--------------|
| 1180 | L4P_ZT.497 | 4 | 7.74 | 62.2 | 5.55E+05 (K) |
| 1943 | L4P_ZT.408 | 5 | 5.73 | 67.5 | 3.21E+04 (K) |
| 1017 | L5P_ZT.465 | 5 | 8.33 | 61.3 | 6.99E+04 (K) |
| 1793 | X5P_ZT.291 | 5 | 6.08 | 70.5 | 4.05E+05 (K) |
| 1907 | X4P_ZT.293 | 5 | 5.79 | 74.6 | 1.51E+06 (K) |
| 2160 | S1P_ZT_Ro  | 3 | 5.32 | 62.1 | 2.50E+05 (K) |
| 1934 | S1P_ZT_Ro  | 6 | 5.74 | 69.3 | 3.45E+04 (K) |
| 1078 | L4P_ZT.998 | 2 | 8.09 | 63.1 | 5.90E+05 (I) |
| 2151 | X4P_ZT.141 | 2 | 5.33 | 63.5 | 9.98E+04 (K) |
| 2112 | L2P_ZT.218 | 2 | 5.41 | 80.3 | 1.19E+06 (K) |
| 2300 | L3P_ZT.229 | 2 | 5.07 | 70.6 | 2.63E+06 (K) |
| 1601 | X3P_ZT.248 | 3 | 6.51 | 73.8 | 1.88E+05 (K) |
| 1050 | X4P_ZT.219 | 3 | 8.2  | 63.2 | 5.17E+04 (N) |
| 1345 | X3P_ZT.217 | 3 | 7.15 | 63.7 | 4.98E+04 (N) |
| 1297 | S3P_ZT_Ro  | 6 | 7.32 | 64.3 | 1.34E+05 (R) |
| 1776 | S2P_ZT_Ro  | 5 | 6.13 | 69.8 | 3.53E+04 (R) |
| 1948 | S1P_ZT_Ro  | 3 | 5.72 | 77.2 | 9.69E+04 (R) |
| 2268 | L3P_ZT.248 | 2 | 5.15 | 89.1 | 6.21E+05 (R) |
| 1367 | S3P_ZT_Ro  | 2 | 7.08 | 61.4 | 1.92E+06 (R) |
| 1752 | L1P_ZT.457 | 2 | 6.19 | 66.6 | 2.57E+06 (R) |
| 1852 | S5P_ZT_Ro  | 2 | 5.92 | 61.5 | 2.29E+06 (R) |
| 1103 | S3P_ZT_Ro  | 2 | 8.02 | 76.1 | 3.13E+06 (R) |
| 1425 | X5P_ZT.527 | 2 | 6.92 | 83.7 | 2.45E+06 (R) |
| 1561 | X1P_ZT.476 | 2 | 6.62 | 84.6 | 1.69E+06 (R) |
| 2220 | L5P_ZT.432 | 3 | 5.23 | 66   | 4.46E+05 (R) |
| 1775 | S3P_ZT_Ro  | 7 | 6.13 | 64.4 | 2.39E+05 (R) |
| 2013 | X3P_ZT.221 | 4 | 5.6  | 88.4 | 7.80E+05 (R) |
| 1071 | S3P_ZT_Ro  | 3 | 8.11 | 67.7 | 2.75E+06 (D) |
| 1277 | X3P_ZT.320 | 3 | 7.4  | 66.5 | 2.80E+06 (D) |
| 1282 | X1P_ZT.311 | 3 | 7.38 | 65.2 | 3.63E+06 (D) |
| 1405 | L2P_ZT.304 | 3 | 6.98 | 61.2 | 3.78E+06 (D) |
| 1446 | L4P_ZT.326 | 3 | 6.88 | 72.9 | 2.40E+06 (D) |
| 1449 | L1P_ZT.306 | 3 | 6.87 | 63.4 | 5.43E+06 (D) |
| 1556 | S4P_ZT_Ro  | 3 | 6.63 | 61.4 | 3.10E+06 (D) |
| 1638 | X3P_ZT.321 | 3 | 6.43 | 64   | 2.80E+06 (D) |
| 1595 | S5P_ZT_Ro  | 5 | 6.52 | 83.2 | 1.84E+05 (V) |
| 879  | L5P_ZT.526 | 3 | 8.87 | 68.7 | 1.24E+07 (V) |
| 908  | X1P_ZT.490 | 3 | 8.75 | 71.3 | 8.04E+06 (V) |
| 992  | S5P_ZT_Ro  | 3 | 8.41 | 69.4 | 2.58E+07 (V) |
| 1048 | X3P_ZT.530 | 3 | 8.21 | 67.9 | 1.56E+07 (V) |
| 1076 | X4P_ZT.527 | 3 | 8.09 | 67.5 | 1.13E+07 (V) |
| 1115 | S3P_ZT_Ro  | 3 | 7.97 | 71.7 | 2.31E+07 (V) |
| 1158 | S5P_ZT_Ro  | 3 | 7.8  | 65.3 | 2.58E+07 (V) |
| 1391 | S5P_ZT_Ro  | 3 | 7    | 68.2 | 2.58E+07 (V) |
| 1444 | L2P_ZT.498 | 3 | 6.88 | 67.1 | 1.43E+07 (V) |
| 1534 | X4P_ZT.511 | 3 | 6.68 | 60.2 | 4.49E+04 (V) |
| 1630 | L1P_ZT.509 | 3 | 6.46 | 62.1 | 2.47E+07 (V) |

|                 |   |      |      |              |
|-----------------|---|------|------|--------------|
| 1235 X3P_ZT.470 | 4 | 7.54 | 64.4 | 9.39E+04 (V) |
| 862 S1P_ZT_Ro   | 3 | 8.94 | 60.2 | 5.78E+06 (K) |
| 2133 X2P_ZT.130 | 2 | 5.36 | 68.7 | 8.35E+05 (R) |
| 875 X5P_ZT.250  | 3 | 8.88 | 64.7 | 1.12E+05 (R) |
| 952 L3P_ZT.240  | 3 | 8.56 | 67.3 | 2.41E+05 (R) |
| 1080 L1P_ZT.230 | 3 | 8.08 | 83.7 | 2.54E+05 (R) |
| 1094 X3P_ZT.240 | 3 | 8.04 | 67.4 | 1.80E+05 (R) |
| 1120 X3P_ZT.240 | 3 | 7.95 | 66.7 | 1.80E+05 (R) |
| 1536 L5P_ZT.250 | 3 | 6.68 | 71.4 | 4.20E+05 (R) |
| 1811 X2P_ZT.250 | 3 | 6.04 | 70   | 2.64E+05 (R) |
| 1928 X4P_ZT.250 | 3 | 5.75 | 100  | 2.52E+05 (R) |
| 826 L4P_ZT.230  | 2 | 9.09 | 68.7 | 1.45E+06 (R) |
| 1035 X2P_ZT.220 | 2 | 8.26 | 77.7 | 1.66E+06 (R) |
| 1191 L3P_ZT.210 | 2 | 7.7  | 73.5 | 5.20E+06 (R) |
| 1223 L1P_ZT.200 | 2 | 7.57 | 63.6 | 1.25E+06 (R) |
| 1522 X5P_ZT.220 | 2 | 6.7  | 66.3 | 1.63E+06 (R) |
| 1673 X1P_ZT.210 | 2 | 6.34 | 67.5 | 1.53E+06 (R) |
| 1723 S4P_ZT_Ro  | 2 | 6.24 | 84   | 5.58E+06 (R) |
| 1743 S1P_ZT_Ro  | 2 | 6.21 | 82.8 | 4.66E+06 (R) |
| 1766 L5P_ZT.220 | 2 | 6.15 | 70.7 | 3.08E+06 (R) |
| 1777 X3P_ZT.210 | 2 | 6.12 | 78.7 | 2.20E+06 (R) |
| 1820 S3P_ZT_Ro  | 2 | 6.01 | 68.5 | 4.87E+06 (R) |
| 1915 S5P_ZT_Ro  | 2 | 5.78 | 76.8 | 8.15E+06 (R) |
| 2073 S2P_ZT_Ro  | 2 | 5.48 | 65.4 | 4.11E+06 (R) |
| 2150 X5P_ZT.220 | 2 | 5.33 | 67.6 | 1.63E+06 (R) |
| 2158 S3P_ZT_Ro  | 2 | 5.32 | 65.9 | 4.87E+06 (R) |
| 2284 X3P_ZT.210 | 2 | 5.1  | 61.5 | 2.20E+06 (R) |
| 2308 L4P_ZT.180 | 2 | 5.06 | 64.2 | 1.87E+05 (R) |
| 2207 X2P_ZT.100 | 2 | 5.24 | 61   | 1.13E+06 (R) |
| 2298 L3P_ZT.190 | 2 | 5.08 | 64.5 | 8.89E+05 (R) |
| 2044 L4P_ZT.120 | 2 | 5.54 | 81   | 2.67E+05 (R) |
| 2002 S5P_ZT_Ro  | 2 | 5.62 | 67.5 | 3.07E+05 (R) |
| 713 S4P_ZT_Ro   | 2 | 9.68 | 61.9 | 1.53E+06 (F) |
| 1003 X5P_ZT.190 | 3 | 8.36 | 63   | 3.75E+06 (F) |
| 1582 L3P_ZT.360 | 3 | 6.57 | 65.3 | 3.89E+04 (E) |
| 1310 L5P_ZT.450 | 3 | 7.28 | 62.6 | 6.67E+04 (G) |
| 1399 L3P_ZT.240 | 3 | 6.99 | 70.1 | 8.80E+05 (V) |
| 1798 S2P_ZT_Ro  | 7 | 6.07 | 60.2 | 2.90E+05 (R) |
| 1386 S2P_ZT_Ro  | 6 | 7.02 | 65.5 | 1.65E+05 (R) |
| 1336 X5P_ZT.820 | 3 | 7.19 | 67.7 | 2.31E+06 (E) |
| 1589 L4P_ZT.990 | 3 | 6.55 | 60.3 | 2.28E+06 (E) |
| 1603 X3P_ZT.820 | 3 | 6.51 | 62.6 | 3.52E+06 (E) |
| 1965 X5P_ZT.820 | 2 | 5.68 | 77.5 | 5.65E+05 (K) |
| 2175 S2P_ZT_Ro  | 2 | 5.29 | 71.4 | 4.86E+05 (K) |
| 1515 S2P_ZT_Ro  | 4 | 6.72 | 72.4 | 5.98E+04 (K) |
| 1348 S4P_ZT_Ro  | 5 | 7.15 | 62.7 | 3.98E+05 (R) |
| 1416 S4P_ZT_Ro  | 5 | 6.95 | 67.4 | 3.98E+05 (R) |

|                 |   |       |      |              |
|-----------------|---|-------|------|--------------|
| 1575 L3P_ZT.528 | 5 | 6.58  | 69.2 | 2.03E+05 (R) |
| 1594 L3P_ZT.531 | 5 | 6.53  | 80.5 | 2.05E+05 (R) |
| 1719 S2P_ZT_Ro  | 5 | 6.25  | 65.4 | 3.95E+05 (R) |
| 1735 S5P_ZT_Ro  | 5 | 6.22  | 72.2 | 3.14E+05 (R) |
| 1828 S1P_ZT_Ro  | 4 | 5.99  | 61.2 | 1.32E+05 (R) |
| 1893 L5P_ZT.530 | 5 | 5.83  | 67.5 | 3.93E+04 (R) |
| 1919 S3P_ZT_Ro  | 5 | 5.77  | 68.4 | 2.98E+05 (R) |
| 1971 S2P_ZT_Ro  | 5 | 5.67  | 72.4 | 3.95E+05 (R) |
| 2049 S1P_ZT_Ro  | 5 | 5.53  | 69.6 | 3.98E+05 (R) |
| 2036 X3P_ZT.159 | 2 | 5.55  | 77.1 | 5.75E+06 (R) |
| 2056 S4P_ZT_Ro  | 3 | 5.52  | 62.5 | 1.20E+06 (-) |
| 2080 L2P_ZT.171 | 2 | 5.47  | 92.6 | 2.61E+05 (-) |
| 1314 S5P_ZT_Ro  | 5 | 7.26  | 73.2 | 1.29E+05 (K) |
| 1489 S3P_ZT_Ro  | 5 | 6.77  | 61.4 | 1.76E+06 (K) |
| 2301 L5P_ZT.404 | 3 | 5.07  | 91.6 | 6.85E+05 (K) |
| 1734 X1P_ZT.407 | 4 | 6.22  | 61.1 | 3.38E+05 (K) |
| 2266 S1P_ZT_Ro  | 2 | 5.15  | 69.4 | 1.11E+06 (K) |
| 1819 S4P_ZT_Ro  | 3 | 6.01  | 73   | 1.64E+06 (K) |
| 2094 S5P_ZT_Ro  | 2 | 5.45  | 65.8 | 3.25E+05 (K) |
| 2254 X2P_ZT.369 | 7 | 5.17  | 84.8 | 6.20E+04 (R) |
| 1125 X2P_ZT.130 | 3 | 7.93  | 91.8 | 2.80E+06 (K) |
| 1228 S2P_ZT_Ro  | 3 | 7.56  | 66.1 | 1.17E+06 (K) |
| 1409 S5P_ZT_Ro  | 3 | 6.97  | 100  | 1.03E+06 (K) |
| 1443 S4P_ZT_Ro  | 3 | 6.88  | 77.9 | 6.34E+05 (K) |
| 1625 L5P_ZT.131 | 3 | 6.47  | 100  | 2.79E+06 (K) |
| 2240 S5P_ZT_Ro  | 3 | 5.21  | 82.1 | 1.03E+06 (K) |
| 1335 S3P_ZT_Ro  | 4 | 7.2   | 75.1 | 1.45E+05 (F) |
| 954 X2P_ZT.547  | 4 | 8.54  | 79.4 | 4.52E+05 (L) |
| 1214 L5P_ZT.537 | 4 | 7.62  | 72.1 | 2.46E+05 (L) |
| 1270 X3P_ZT.547 | 4 | 7.43  | 86.8 | 1.84E+05 (L) |
| 1586 X5P_ZT.559 | 4 | 6.55  | 79.9 | 3.22E+05 (L) |
| 1649 S2P_ZT_Ro  | 7 | 6.41  | 60.9 | 8.60E+05 (W) |
| 1768 S4P_ZT_Ro  | 6 | 6.14  | 60.8 | 3.48E+04 (K) |
| 2174 X1P_ZT.217 | 6 | 5.29  | 67.7 | 7.11E+03 (A) |
| 742 L5P_ZT.197  | 3 | 9.56  | 61.5 | 5.91E+05 (R) |
| 1799 L4P_ZT.204 | 3 | 6.07  | 70   | 1.74E+05 (R) |
| 1585 X2P_ZT.553 | 5 | 6.56  | 63.4 | 3.76E+05 (E) |
| 971 X4P_ZT.483  | 7 | 8.47  | 65   | 4.23E+05 (D) |
| 647 L3P_ZT.250  | 2 | 10.01 | 77.4 | 2.36E+05 (N) |
| 810 S4P_ZT_Ro   | 2 | 9.15  | 70.1 | 2.87E+05 (N) |
| 913 X4P_ZT.250  | 2 | 8.72  | 67.8 | 1.50E+05 (N) |
| 955 S5P_ZT_Ro   | 2 | 8.54  | 70.2 | 3.16E+05 (N) |
| 1321 X4P_ZT.470 | 5 | 7.23  | 63.5 | 1.07E+05 (G) |
| 726 L4P_ZT.320  | 2 | 9.61  | 73.5 | 1.49E+06 (D) |
| 1015 S1P_ZT_Ro  | 2 | 8.33  | 65.4 | 3.25E+06 (D) |
| 1021 S4P_ZT_Ro  | 2 | 8.31  | 68.9 | 2.45E+06 (D) |
| 1377 X1P_ZT.300 | 2 | 7.04  | 69.6 | 8.72E+05 (D) |

|                 |   |       |      |              |
|-----------------|---|-------|------|--------------|
| 1005 S5P_ZT_Ro  | 3 | 8.36  | 62   | 6.90E+06 (V) |
| 1154 S3P_ZT_Ro  | 3 | 7.82  | 62.3 | 1.77E+07 (V) |
| 942 L4P_ZT.267  | 2 | 8.59  | 62.9 | 2.98E+05 (G) |
| 1181 S5P_ZT_Ro  | 2 | 7.73  | 63.8 | 5.34E+05 (G) |
| 1248 L3P_ZT.501 | 5 | 7.49  | 70.3 | 7.84E+04 (K) |
| 1289 X5P_ZT.593 | 5 | 7.36  | 69.3 | 6.88E+04 (K) |
| 1557 L3P_ZT.526 | 5 | 6.63  | 78.9 | 4.19E+04 (K) |
| 2006 L1P_ZT.464 | 4 | 5.62  | 67.3 | 1.56E+06 (K) |
| 1578 X5P_ZT.383 | 3 | 6.57  | 62.6 | 6.55E+06 (K) |
| 2199 S4P_ZT_Ro  | 5 | 5.25  | 100  | 1.88E+04 (K) |
| 2061 X5P_ZT.237 | 2 | 5.5   | 100  | 8.19E+05 (K) |
| 2064 S4P_ZT_Ro  | 2 | 5.5   | 100  | 6.16E+05 (K) |
| 2231 L2P_ZT.216 | 2 | 5.22  | 90.8 | 1.34E+06 (K) |
| 2247 S1P_ZT_Ro  | 6 | 5.2   | 75   | 3.67E+04 (K) |
| 2293 S1P_ZT_Ro  | 2 | 5.09  | 67   | 8.22E+05 (R) |
| 1560 X2P_ZT.470 | 7 | 6.62  | 67   | 2.73E+05 (R) |
| 1581 L2P_ZT.485 | 3 | 6.57  | 67.5 | 1.51E+05 (R) |
| 2069 S5P_ZT_Ro  | 3 | 5.49  | 71.5 | 1.09E+05 (R) |
| 2100 X3P_ZT.514 | 3 | 5.43  | 88.4 | 7.83E+04 (R) |
| 1807 S5P_ZT_Ro  | 5 | 6.05  | 61.9 | 3.08E+06 (R) |
| 1552 S3P_ZT_Ro  | 4 | 6.64  | 77.3 | 2.81E+04 (K) |
| 1176 L5P_ZT.429 | 6 | 7.75  | 100  | 1.42E+05 (K) |
| 1407 X3P_ZT.497 | 5 | 6.97  | 71.4 | 7.55E+04 (K) |
| 1620 X3P_ZT.498 | 5 | 6.47  | 72.5 | 3.66E+04 (K) |
| 1725 S2P_ZT_Ro  | 7 | 6.24  | 64   | 2.87E+05 (K) |
| 2242 S2P_ZT_Ro  | 4 | 5.21  | 82.5 | 1.38E+04 (K) |
| 419 S5P_ZT_Ro   | 2 | 11.67 | 88.8 | 2.30E+06 (F) |
| 794 S4P_ZT_Ro   | 2 | 9.25  | 73.2 | 2.94E+06 (F) |
| 841 S3P_ZT_Ro   | 2 | 9.02  | 85.4 | 2.25E+06 (F) |
| 983 S2P_ZT_Ro   | 2 | 8.44  | 72.1 | 3.60E+06 (F) |
| 1037 S1P_ZT_Ro  | 2 | 8.26  | 69.8 | 1.42E+06 (F) |
| 1107 S4P_ZT_Ro  | 2 | 8.01  | 66.4 | 2.94E+06 (F) |
| 1225 X3P_ZT.465 | 2 | 7.56  | 60.2 | 1.04E+05 (F) |
| 559 X4P_ZT.473  | 2 | 10.65 | 82.2 | 2.91E+05 (K) |
| 568 X2P_ZT.480  | 2 | 10.58 | 79.5 | 3.43E+05 (K) |
| 646 L2P_ZT.452  | 2 | 10.01 | 70.9 | 8.63E+05 (K) |
| 655 X3P_ZT.476  | 2 | 9.97  | 85.5 | 2.76E+05 (K) |
| 702 L5P_ZT.475  | 2 | 9.74  | 77.4 | 1.21E+06 (K) |
| 820 S4P_ZT_Ro   | 2 | 9.1   | 80.4 | 4.40E+05 (K) |
| 965 L3P_ZT.473  | 2 | 8.5   | 70.8 | 1.23E+06 (K) |
| 995 L1P_ZT.464  | 2 | 8.39  | 70.4 | 1.46E+06 (K) |
| 1263 X1P_ZT.446 | 2 | 7.44  | 71.3 | 2.74E+06 (K) |
| 1293 X2P_ZT.483 | 2 | 7.34  | 80.6 | 9.30E+05 (K) |
| 1342 X5P_ZT.486 | 2 | 7.16  | 67.2 | 1.01E+06 (K) |
| 1362 L1P_ZT.462 | 2 | 7.11  | 74.4 | 1.35E+06 (K) |
| 1631 L2P_ZT.453 | 2 | 6.46  | 74.9 | 9.68E+05 (K) |
| 1708 X1P_ZT.449 | 2 | 6.27  | 70.3 | 2.73E+06 (K) |



|      |            |   |      |      |              |
|------|------------|---|------|------|--------------|
| 2307 | L3P_ZT.474 | 2 | 5.06 | 70.4 | 5.27E+05 (K) |
| 1423 | L2P_ZT.516 | 4 | 6.93 | 71   | 1.16E+07 (K) |
| 1674 | S5P_ZT_Ro  | 4 | 6.34 | 78.9 | 8.33E+06 (K) |
| 1829 | X4P_ZT.551 | 4 | 5.98 | 62.5 | 1.64E+07 (K) |
| 2108 | L5P_ZT.554 | 4 | 5.42 | 62.9 | 8.86E+06 (K) |
| 1487 | S4P_ZT_Ro  | 4 | 6.77 | 74   | 6.92E+05 (K) |
| 1614 | S5P_ZT_Ro  | 4 | 6.48 | 68.9 | 7.01E+05 (K) |
| 2122 | S2P_ZT_Ro  | 3 | 5.38 | 61.6 | 1.18E+06 (K) |
| 1400 | L3P_ZT.543 | 5 | 6.99 | 78.2 | 4.48E+04 (V) |
| 1590 | X3P_ZT.544 | 3 | 6.54 | 60.7 | 6.96E+04 (I) |
| 2211 | L3P_ZT.460 | 6 | 5.24 | 60.5 | 3.13E+05 (V) |
| 1378 | X1P_ZT.484 | 3 | 7.04 | 61.8 | 1.47E+05 (I) |
| 1545 | S5P_ZT_Ro  | 3 | 6.65 | 60.6 | 8.81E+05 (I) |
| 1740 | L4P_ZT.485 | 3 | 6.22 | 64.6 | 1.06E+05 (I) |
| 1031 | X2P_ZT.524 | 3 | 8.27 | 60.1 | 2.25E+05 (R) |
| 1124 | L1P_ZT.502 | 3 | 7.94 | 72.2 | 6.99E+05 (R) |
| 1546 | S4P_ZT_Ro  | 3 | 6.65 | 86.7 | 1.00E+06 (R) |
| 1707 | S4P_ZT_Ro  | 3 | 6.28 | 86.3 | 1.00E+06 (R) |
| 1717 | S3P_ZT_Ro  | 3 | 6.25 | 81.5 | 1.88E+05 (R) |
| 1748 | S1P_ZT_Ro  | 3 | 6.2  | 100  | 2.35E+05 (R) |
| 1886 | S5P_ZT_Ro  | 3 | 5.84 | 74.9 | 6.92E+05 (R) |
| 2191 | S2P_ZT_Ro  | 3 | 5.26 | 63.4 | 5.26E+05 (R) |
| 1626 | L5P_ZT.351 | 3 | 6.47 | 68.7 | 3.77E+04 (R) |
| 1067 | L4P_ZT.833 | 2 | 8.13 | 73.7 | 3.21E+06 (R) |
| 1428 | S4P_ZT_Ro  | 2 | 6.92 | 69.9 | 3.55E+06 (R) |
| 1505 | L3P_ZT.745 | 2 | 6.74 | 79.1 | 3.60E+06 (R) |
| 1526 | S2P_ZT_Ro  | 2 | 6.7  | 73.5 | 4.85E+06 (R) |
| 1529 | S1P_ZT_Ro  | 2 | 6.69 | 74.3 | 7.65E+06 (R) |
| 1544 | X2P_ZT.691 | 2 | 6.65 | 83   | 3.51E+06 (R) |
| 1972 | S2P_ZT_Ro  | 2 | 5.67 | 68.8 | 4.85E+06 (R) |
| 1161 | X3P_ZT.391 | 6 | 7.79 | 61.5 | 4.36E+04 (R) |
| 1492 | L3P_ZT.389 | 5 | 6.77 | 63.7 | 2.53E+04 (R) |
| 1696 | X3P_ZT.391 | 6 | 6.29 | 65.8 | 3.44E+04 (R) |
| 1989 | L3P_ZT.389 | 6 | 5.65 | 61.3 | 2.61E+04 (R) |
| 1779 | S4P_ZT_Ro  | 2 | 6.12 | 60.8 | 1.05E+07 (K) |
| 2052 | L5P_ZT.128 | 2 | 5.53 | 76.6 | 1.09E+07 (K) |
| 2267 | L2P_ZT.289 | 2 | 5.15 | 64.7 | 1.28E+05 (K) |
| 2214 | X3P_ZT.391 | 3 | 5.23 | 73.1 | 5.92E+04 (K) |
| 1165 | S1P_ZT_Ro  | 3 | 7.78 | 66.2 | 6.08E+04 (F) |
| 1647 | L1P_ZT.359 | 3 | 6.42 | 61.9 | 1.67E+05 (F) |
| 919  | L4P_ZT.179 | 2 | 8.71 | 69.6 | 9.35E+05 (K) |
| 946  | S2P_ZT_Ro  | 2 | 8.58 | 74.4 | 6.14E+05 (K) |
| 1216 | S3P_ZT_Ro  | 2 | 7.61 | 62.9 | 5.85E+05 (K) |
| 1296 | S4P_ZT_Ro  | 2 | 7.32 | 70.8 | 5.94E+05 (K) |
| 1334 | S5P_ZT_Ro  | 2 | 7.2  | 69.2 | 8.18E+05 (K) |
| 1338 | S1P_ZT_Ro  | 2 | 7.18 | 64   | 6.89E+05 (K) |
| 1465 | S2P_ZT_Ro  | 2 | 6.82 | 63.1 | 3.12E+06 (K) |

|                 |   |      |      |              |
|-----------------|---|------|------|--------------|
| 1877 S3P_ZT_Ro  | 2 | 5.87 | 65.1 | 1.13E+07 (K) |
| 1898 L2P_ZT.280 | 2 | 5.82 | 63.3 | 1.14E+07 (K) |
| 1287 X1P_ZT.274 | 6 | 7.37 | 69.5 | 2.16E+05 (T) |
| 1290 S4P_ZT_Ro  | 6 | 7.35 | 68.8 | 2.60E+05 (T) |
| 1458 S3P_ZT_Ro  | 6 | 6.84 | 65   | 2.01E+06 (T) |
| 1549 L5P_ZT.289 | 6 | 6.65 | 68.4 | 2.09E+05 (T) |
| 1682 L3P_ZT.279 | 6 | 6.32 | 65.1 | 2.04E+05 (T) |
| 2005 S3P_ZT_Ro  | 6 | 5.62 | 65   | 1.17E+05 (T) |
| 2246 S3P_ZT_Ro  | 6 | 5.2  | 65.7 | 1.78E+06 (T) |
| 2291 X1P_ZT.274 | 6 | 5.09 | 60.1 | 1.33E+05 (T) |
| 778 L5P_ZT.295  | 2 | 9.35 | 72.2 | 3.52E+05 (C) |
| 2206 X4P_ZT.547 | 5 | 5.24 | 63.5 | 1.52E+05 (N) |
| 2241 S4P_ZT_Ro  | 2 | 5.21 | 74   | 7.04E+04 (K) |
| 1064 X4P_ZT.204 | 3 | 8.13 | 66.5 | 4.79E+05 (K) |
| 1370 X3P_ZT.204 | 3 | 7.07 | 66.1 | 4.66E+05 (K) |
| 1385 S2P_ZT_Ro  | 3 | 7.02 | 60.3 | 9.02E+05 (K) |
| 1432 S4P_ZT_Ro  | 2 | 6.9  | 60.3 | 8.08E+04 (K) |
| 1713 S4P_ZT_Ro  | 3 | 6.26 | 67.8 | 4.91E+05 (K) |
| 1922 X5P_ZT.204 | 2 | 5.76 | 60.9 | 1.52E+05 (K) |
| 2111 S2P_ZT_Ro  | 2 | 5.41 | 76.5 | 4.44E+05 (K) |
| 1434 L2P_ZT.410 | 3 | 6.9  | 66.4 | 3.54E+05 (L) |
| 1555 S5P_ZT_Ro  | 3 | 6.63 | 60.2 | 9.26E+05 (L) |
| 1602 X3P_ZT.434 | 3 | 6.51 | 65.5 | 4.96E+05 (L) |
| 1950 L2P_ZT.411 | 3 | 5.72 | 78.9 | 3.54E+05 (L) |
| 1343 X3P_ZT.304 | 2 | 7.16 | 62.3 | 2.61E+05 (K) |
| 1913 X3P_ZT.306 | 2 | 5.78 | 81.6 | 3.36E+05 (K) |
| 1204 L2P_ZT.495 | 3 | 7.66 | 68.6 | 6.72E+05 (K) |
| 2077 X2P_ZT.526 | 3 | 5.47 | 78.2 | 5.24E+05 (K) |
| 1883 S1P_ZT_Ro  | 2 | 5.86 | 76.8 | 2.14E+06 (R) |
| 1947 S1P_ZT_Ro  | 2 | 5.72 | 88   | 5.36E+06 (R) |
| 2137 S1P_ZT_Ro  | 2 | 5.36 | 71.9 | 2.70E+07 (R) |
| 2305 S1P_ZT_Ro  | 2 | 5.06 | 61.9 | 2.14E+06 (R) |
| 1665 L5P_ZT.217 | 3 | 6.37 | 70   | 1.04E+05 (R) |
| 1640 S1P_ZT_Ro  | 3 | 6.43 | 67.9 | 6.59E+04 (R) |
| 1663 L1P_ZT.454 | 3 | 6.37 | 72.9 | 5.13E+05 (R) |
| 1892 L5P_ZT.467 | 3 | 5.83 | 69.1 | 4.25E+05 (R) |
| 1964 S1P_ZT_Ro  | 3 | 5.69 | 67.8 | 6.59E+04 (R) |
| 2144 X2P_ZT.474 | 3 | 5.34 | 84.5 | 2.85E+05 (R) |
| 2159 S3P_ZT_Ro  | 3 | 5.32 | 61.4 | 3.68E+05 (R) |
| 2180 S2P_ZT_Ro  | 3 | 5.28 | 68   | 7.56E+05 (R) |
| 2263 X5P_ZT.554 | 3 | 5.15 | 61.7 | 2.05E+04 (R) |
| 958 X2P_ZT.314  | 2 | 8.52 | 67.1 | 7.50E+06 (R) |
| 1171 L3P_ZT.329 | 2 | 7.76 | 66.7 | 4.96E+06 (R) |
| 1187 X1P_ZT.364 | 2 | 7.72 | 63.1 | 6.61E+04 (R) |
| 1217 S1P_ZT_Ro  | 2 | 7.6  | 70.9 | 6.81E+06 (R) |
| 1231 L3P_ZT.291 | 2 | 7.56 | 70   | 1.32E+07 (R) |
| 1249 L5P_ZT.371 | 2 | 7.49 | 64.7 | 1.84E+05 (R) |

|      |            |   |      |      |              |
|------|------------|---|------|------|--------------|
| 1257 | L3P_ZT.366 | 2 | 7.47 | 61.3 | 3.63E+04 (R) |
| 1274 | L3P_ZT.396 | 2 | 7.41 | 61   | 1.90E+05 (R) |
| 1298 | L3P_ZT.267 | 2 | 7.32 | 70.9 | 2.00E+07 (R) |
| 1304 | X2P_ZT.286 | 2 | 7.3  | 71.2 | 1.57E+07 (R) |
| 1467 | S1P_ZT_Ro  | 2 | 6.82 | 69.1 | 3.38E+07 (R) |
| 1471 | L1P_ZT.294 | 2 | 6.81 | 68.1 | 1.11E+06 (R) |
| 1486 | X3P_ZT.276 | 2 | 6.77 | 68.1 | 1.64E+07 (R) |
| 1488 | S4P_ZT_Ro  | 2 | 6.77 | 68.4 | 3.64E+07 (R) |
| 1493 | X5P_ZT.326 | 2 | 6.76 | 67.7 | 7.80E+04 (R) |
| 1513 | S5P_ZT_Ro  | 2 | 6.72 | 65.8 | 3.99E+07 (R) |
| 1516 | L5P_ZT.383 | 2 | 6.72 | 61.1 | 1.33E+05 (R) |
| 1525 | S3P_ZT_Ro  | 2 | 6.7  | 66.8 | 4.54E+07 (R) |
| 1537 | X4P_ZT.316 | 2 | 6.67 | 64.9 | 3.95E+06 (R) |
| 1538 | S3P_ZT_Ro  | 2 | 6.67 | 63.8 | 1.33E+06 (R) |
| 1591 | X2P_ZT.306 | 2 | 6.54 | 63.1 | 1.00E+07 (R) |
| 1610 | L3P_ZT.348 | 2 | 6.5  | 69.2 | 2.01E+06 (R) |
| 1644 | X1P_ZT.284 | 2 | 6.42 | 65.4 | 9.70E+06 (R) |
| 1651 | L4P_ZT.334 | 2 | 6.41 | 63   | 3.43E+06 (R) |
| 1688 | X1P_ZT.266 | 2 | 6.3  | 69.5 | 1.66E+07 (R) |
| 1693 | X4P_ZT.336 | 2 | 6.29 | 70.1 | 1.39E+06 (R) |
| 1730 | L5P_ZT.300 | 2 | 6.23 | 67.2 | 2.08E+07 (R) |
| 1732 | X1P_ZT.286 | 2 | 6.22 | 67.3 | 9.24E+06 (R) |
| 1733 | X1P_ZT.366 | 2 | 6.22 | 64.8 | 2.82E+04 (R) |
| 1742 | S2P_ZT_Ro  | 2 | 6.21 | 66.1 | 1.95E+07 (R) |
| 1778 | X1P_ZT.304 | 2 | 6.12 | 63.6 | 4.51E+06 (R) |
| 1781 | L1P_ZT.300 | 2 | 6.11 | 63.9 | 3.40E+06 (R) |
| 1785 | L2P_ZT.272 | 2 | 6.1  | 65.5 | 5.42E+06 (R) |
| 1856 | L3P_ZT.325 | 2 | 5.92 | 61.1 | 5.42E+06 (R) |
| 1871 | X3P_ZT.310 | 2 | 5.89 | 63.8 | 6.46E+06 (R) |
| 2000 | X3P_ZT.294 | 2 | 5.62 | 69.9 | 1.41E+07 (R) |
| 2007 | L3P_ZT.310 | 2 | 5.62 | 64.4 | 6.55E+06 (R) |
| 2071 | L4P_ZT.375 | 2 | 5.49 | 64.8 | 1.66E+04 (R) |
| 2118 | X2P_ZT.316 | 2 | 5.39 | 60.5 | 5.09E+04 (R) |
| 2134 | S3P_ZT_Ro  | 2 | 5.36 | 70.4 | 3.72E+06 (R) |
| 2139 | L3P_ZT.296 | 2 | 5.36 | 69.4 | 9.38E+06 (R) |
| 2141 | L5P_ZT.400 | 2 | 5.36 | 69.7 | 2.54E+05 (R) |
| 2237 | X2P_ZT.404 | 2 | 5.21 | 84.8 | 6.74E+04 (R) |
| 2264 | X3P_ZT.386 | 2 | 5.15 | 65.5 | 1.60E+04 (R) |
| 2270 | L5P_ZT.280 | 2 | 5.14 | 65   | 1.48E+07 (R) |
| 2271 | L2P_ZT.286 | 2 | 5.13 | 70   | 5.43E+06 (R) |
| 2272 | L2P_ZT.385 | 2 | 5.13 | 83.4 | 6.52E+04 (R) |
| 2306 | L2P_ZT.410 | 2 | 5.06 | 89.2 | 2.65E+05 (R) |
| 2325 | L1P_ZT.317 | 2 | 5.01 | 69.7 | 1.78E+06 (R) |
| 1847 | L1P_ZT.377 | 4 | 5.93 | 65.6 | 4.18E+04 (R) |
| 2196 | X4P_ZT.444 | 5 | 5.25 | 100  | 3.30E+04 (R) |
| 1396 | X5P_ZT.386 | 2 | 6.99 | 65.1 | 1.13E+05 (R) |
| 1429 | S1P_ZT_Ro  | 3 | 6.92 | 71.9 | 9.25E+05 (R) |

|                 |   |       |      |              |
|-----------------|---|-------|------|--------------|
| 1636 S4P_ZT_Ro  | 3 | 6.45  | 75.7 | 1.70E+06 (R) |
| 1706 S5P_ZT_Ro  | 3 | 6.28  | 67.9 | 1.50E+06 (R) |
| 716 L3P_ZT.504  | 6 | 9.67  | 78.4 | 1.06E+05 (R) |
| 1288 S1P_ZT_Ro  | 4 | 7.37  | 74.6 | 3.53E+06 (R) |
| 1387 S3P_ZT_Ro  | 4 | 7.01  | 72.5 | 2.12E+06 (R) |
| 1533 L5P_ZT.371 | 4 | 6.69  | 66.1 | 1.80E+06 (R) |
| 1584 X3P_ZT.367 | 4 | 6.56  | 62   | 3.37E+06 (R) |
| 1608 S2P_ZT_Ro  | 4 | 6.5   | 66.7 | 3.15E+06 (R) |
| 1812 L2P_ZT.351 | 4 | 6.04  | 60.1 | 2.06E+06 (R) |
| 2074 X4P_ZT.367 | 4 | 5.47  | 64.4 | 2.22E+06 (R) |
| 2287 S5P_ZT_Ro  | 7 | 5.1   | 61.6 | 5.31E+04 (R) |
| 698 L2P_ZT.482  | 6 | 9.75  | 74.5 | 1.55E+05 (R) |
| 1224 L1P_ZT.420 | 2 | 7.57  | 60.4 | 1.21E+07 (R) |
| 1109 X4P_ZT.243 | 3 | 8     | 70.9 | 1.93E+05 (N) |
| 7 S5P_ZT_Ro     | 2 | 20.66 | 97.6 | 8.82E+07 (-) |
| 8 S4P_ZT_Ro     | 2 | 20.62 | 96.8 | 1.16E+08 (-) |
| 9 S4P_ZT_Ro     | 2 | 20.62 | 97.7 | 1.16E+08 (-) |
| 10 S3P_ZT_Ro    | 2 | 20.42 | 97.8 | 9.75E+07 (-) |
| 11 L3P_ZT.325   | 2 | 20.41 | 97.5 | 1.59E+08 (-) |
| 12 S2P_ZT_Ro    | 2 | 20.39 | 97.5 | 9.98E+07 (-) |
| 13 S1P_ZT_Ro    | 2 | 20.12 | 97.2 | 9.67E+07 (-) |
| 16 X3P_ZT.343   | 2 | 19.77 | 92.7 | 6.73E+07 (-) |
| 17 X3P_ZT.329   | 2 | 19.62 | 97.6 | 1.19E+08 (-) |
| 18 L1P_ZT.313   | 2 | 19.55 | 95.3 | 2.17E+07 (-) |
| 23 S2P_ZT_Ro    | 2 | 19.34 | 96.8 | 9.98E+07 (-) |
| 28 S3P_ZT_Ro    | 2 | 18.9  | 98.5 | 9.75E+07 (-) |
| 29 X4P_ZT.329   | 2 | 18.87 | 97.6 | 1.23E+08 (-) |
| 34 S5P_ZT_Ro    | 2 | 18.5  | 94.4 | 8.82E+07 (-) |
| 38 L4P_ZT.338   | 2 | 18    | 92.2 | 4.71E+06 (-) |
| 40 L3P_ZT.389   | 2 | 17.96 | 91.7 | 1.83E+05 (-) |
| 43 L2P_ZT.317   | 2 | 17.73 | 93.2 | 4.41E+06 (-) |
| 44 S4P_ZT_Ro    | 2 | 17.67 | 91.6 | 2.87E+06 (-) |
| 49 X4P_ZT.347   | 2 | 17.61 | 96   | 3.71E+07 (-) |
| 50 S3P_ZT_Ro    | 2 | 17.61 | 90.2 | 2.22E+06 (-) |
| 51 X2P_ZT.344   | 2 | 17.59 | 94.6 | 2.26E+07 (-) |
| 52 L3P_ZT.359   | 2 | 17.44 | 91   | 3.35E+06 (-) |
| 59 L3P_ZT.342   | 2 | 17.02 | 94.5 | 4.15E+07 (-) |
| 61 X4P_ZT.403   | 2 | 16.83 | 88.3 | 1.03E+06 (-) |
| 64 S2P_ZT_Ro    | 2 | 16.72 | 85.5 | 4.16E+06 (-) |
| 66 S4P_ZT_Ro    | 2 | 16.54 | 87.3 | 1.90E+06 (-) |
| 72 X5P_ZT.347   | 2 | 16.35 | 94.7 | 1.57E+07 (-) |
| 81 X3P_ZT.360   | 2 | 15.98 | 91.8 | 1.87E+06 (-) |
| 89 S1P_ZT_Ro    | 2 | 15.71 | 92.9 | 1.09E+08 (-) |
| 111 S5P_ZT_Ro   | 2 | 15.25 | 85.1 | 1.48E+06 (-) |
| 113 S4P_ZT_Ro   | 2 | 15.22 | 85.5 | 1.45E+06 (-) |
| 115 X3P_ZT.367  | 2 | 15.17 | 76.1 | 1.82E+06 (-) |
| 125 S1P_ZT_Ro   | 2 | 14.97 | 91.4 | 3.22E+06 (-) |

|     |            |   |       |      |              |
|-----|------------|---|-------|------|--------------|
| 129 | L3P_ZT.371 | 2 | 14.93 | 85.5 | 6.00E+05 (-) |
| 142 | X4P_ZT.360 | 2 | 14.77 | 85.6 | 7.55E+05 (-) |
| 145 | X4P_ZT.384 | 2 | 14.7  | 77.7 | 1.00E+06 (-) |
| 147 | X4P_ZT.373 | 2 | 14.68 | 70.7 | 7.39E+05 (-) |
| 162 | X4P_ZT.370 | 2 | 14.45 | 84   | 1.14E+06 (-) |
| 167 | L3P_ZT.390 | 2 | 14.37 | 82.2 | 1.83E+05 (-) |
| 181 | L3P_ZT.368 | 2 | 14.14 | 88.9 | 1.27E+06 (-) |
| 187 | S1P_ZT_Ro  | 2 | 14.08 | 82.4 | 3.01E+05 (-) |
| 188 | L3P_ZT.433 | 2 | 14.08 | 77.1 | 7.96E+05 (-) |
| 192 | S1P_ZT_Ro  | 2 | 14.04 | 86.6 | 1.61E+06 (-) |
| 196 | S3P_ZT_Ro  | 2 | 13.99 | 86.8 | 8.02E+05 (-) |
| 198 | L3P_ZT.386 | 2 | 13.96 | 69.7 | 1.83E+05 (-) |
| 224 | S1P_ZT_Ro  | 2 | 13.64 | 82.9 | 4.58E+05 (-) |
| 226 | S5P_ZT_Ro  | 2 | 13.6  | 82.1 | 3.60E+05 (-) |
| 227 | S2P_ZT_Ro  | 2 | 13.59 | 82.2 | 4.46E+05 (-) |
| 232 | L3P_ZT.378 | 2 | 13.56 | 77.4 | 1.77E+06 (-) |
| 240 | S1P_ZT_Ro  | 2 | 13.42 | 77.8 | 1.38E+06 (-) |
| 255 | X3P_ZT.363 | 2 | 13.22 | 85   | 1.24E+06 (-) |
| 262 | S2P_ZT_Ro  | 2 | 13.11 | 75.1 | 9.05E+05 (-) |
| 269 | S2P_ZT_Ro  | 2 | 13.03 | 79.8 | 1.24E+06 (-) |
| 283 | X3P_ZT.356 | 2 | 12.78 | 80   | 4.63E+06 (-) |
| 285 | S4P_ZT_Ro  | 2 | 12.78 | 86.6 | 1.28E+06 (-) |
| 286 | S2P_ZT_Ro  | 2 | 12.77 | 79.2 | 6.20E+06 (-) |
| 287 | L3P_ZT.365 | 2 | 12.76 | 66.7 | 1.87E+06 (-) |
| 290 | S2P_ZT_Ro  | 2 | 12.72 | 73.3 | 1.33E+06 (-) |
| 303 | S1P_ZT_Ro  | 2 | 12.63 | 75.1 | 1.29E+06 (-) |
| 335 | L3P_ZT.323 | 2 | 12.4  | 79.7 | 1.05E+07 (-) |
| 343 | S2P_ZT_Ro  | 2 | 12.35 | 75.5 | 1.89E+06 (-) |
| 349 | S1P_ZT_Ro  | 2 | 12.27 | 63.9 | 8.39E+05 (-) |
| 350 | S4P_ZT_Ro  | 2 | 12.26 | 75.2 | 8.35E+05 (-) |
| 352 | S5P_ZT_Ro  | 2 | 12.24 | 83.8 | 1.64E+06 (-) |
| 354 | S3P_ZT_Ro  | 2 | 12.21 | 68.8 | 1.48E+06 (-) |
| 368 | S2P_ZT_Ro  | 2 | 12.05 | 79.8 | 9.33E+05 (-) |
| 370 | X4P_ZT.363 | 2 | 12.04 | 75.3 | 2.11E+06 (-) |
| 374 | X3P_ZT.383 | 2 | 11.97 | 76.3 | 1.50E+06 (-) |
| 380 | S2P_ZT_Ro  | 2 | 11.89 | 73.3 | 5.53E+05 (-) |
| 389 | X4P_ZT.396 | 2 | 11.84 | 74.5 | 1.30E+06 (-) |
| 410 | S2P_ZT_Ro  | 2 | 11.76 | 64.5 | 1.08E+06 (-) |
| 412 | S1P_ZT_Ro  | 2 | 11.73 | 69.1 | 1.32E+05 (-) |
| 425 | L3P_ZT.393 | 2 | 11.64 | 80.5 | 1.75E+05 (-) |
| 427 | L3P_ZT.409 | 2 | 11.6  | 81.9 | 2.83E+05 (-) |
| 428 | L3P_ZT.414 | 2 | 11.6  | 72.2 | 2.83E+05 (-) |
| 432 | S2P_ZT_Ro  | 2 | 11.58 | 76.1 | 1.37E+06 (-) |
| 435 | L1P_ZT.318 | 2 | 11.56 | 88.4 | 2.17E+07 (-) |
| 445 | S3P_ZT_Ro  | 2 | 11.5  | 77.3 | 5.51E+05 (-) |
| 449 | L3P_ZT.392 | 2 | 11.48 | 79.1 | 3.00E+05 (-) |
| 460 | S2P_ZT_Ro  | 2 | 11.39 | 80.5 | 1.64E+06 (-) |

|     |            |   |       |      |              |
|-----|------------|---|-------|------|--------------|
| 469 | X4P_ZT.396 | 2 | 11.33 | 70   | 8.60E+05 (-) |
| 474 | X3P_ZT.388 | 2 | 11.29 | 61.8 | 9.11E+05 (-) |
| 487 | X4P_ZT.386 | 2 | 11.18 | 63.7 | 9.21E+05 (-) |
| 492 | X3P_ZT.391 | 2 | 11.16 | 67.7 | 7.02E+05 (-) |
| 493 | S1P_ZT_Ro  | 2 | 11.15 | 71.4 | 2.06E+06 (-) |
| 496 | S1P_ZT_Ro  | 2 | 11.14 | 76.5 | 1.28E+06 (-) |
| 505 | L3P_ZT.385 | 2 | 11.01 | 78.1 | 1.83E+05 (-) |
| 506 | X3P_ZT.408 | 2 | 11    | 82.4 | 7.89E+05 (-) |
| 513 | S4P_ZT_Ro  | 2 | 10.94 | 65.8 | 3.68E+06 (-) |
| 530 | X3P_ZT.411 | 2 | 10.85 | 66.3 | 6.28E+05 (-) |
| 533 | S2P_ZT_Ro  | 2 | 10.84 | 60.9 | 9.78E+05 (-) |
| 534 | L1P_ZT.324 | 2 | 10.82 | 71.2 | 2.17E+07 (-) |
| 540 | S5P_ZT_Ro  | 2 | 10.79 | 72.8 | 1.42E+06 (-) |
| 542 | X3P_ZT.399 | 2 | 10.78 | 61.4 | 8.73E+05 (-) |
| 543 | S3P_ZT_Ro  | 2 | 10.78 | 71   | 1.73E+05 (-) |
| 565 | S3P_ZT_Ro  | 2 | 10.61 | 71.2 | 6.75E+05 (-) |
| 566 | S5P_ZT_Ro  | 2 | 10.6  | 72   | 5.46E+04 (-) |
| 570 | S4P_ZT_Ro  | 2 | 10.55 | 75.8 | 8.25E+05 (-) |
| 572 | S1P_ZT_Ro  | 2 | 10.52 | 63.9 | 1.49E+06 (-) |
| 573 | X3P_ZT.366 | 2 | 10.51 | 69.5 | 9.00E+04 (-) |
| 580 | X4P_ZT.327 | 2 | 10.44 | 64.8 | 9.61E+06 (-) |
| 590 | X3P_ZT.373 | 2 | 10.39 | 67.8 | 1.49E+06 (-) |
| 597 | X3P_ZT.398 | 2 | 10.35 | 70.7 | 8.04E+05 (-) |
| 601 | X3P_ZT.378 | 2 | 10.32 | 71.8 | 1.27E+06 (-) |
| 605 | S2P_ZT_Ro  | 2 | 10.3  | 73.5 | 2.08E+06 (-) |
| 609 | S1P_ZT_Ro  | 2 | 10.28 | 76.5 | 6.58E+05 (-) |
| 612 | S2P_ZT_Ro  | 2 | 10.24 | 77.1 | 2.75E+05 (-) |
| 614 | L3P_ZT.426 | 2 | 10.23 | 70.2 | 6.50E+05 (-) |
| 629 | S4P_ZT_Ro  | 2 | 10.15 | 73.6 | 3.19E+06 (-) |
| 635 | S5P_ZT_Ro  | 2 | 10.08 | 63.2 | 3.60E+05 (-) |
| 638 | S4P_ZT_Ro  | 2 | 10.07 | 72.6 | 5.75E+05 (-) |
| 674 | S3P_ZT_Ro  | 2 | 9.88  | 79.6 | 3.59E+05 (-) |
| 682 | L3P_ZT.449 | 2 | 9.81  | 64.5 | 1.18E+04 (-) |
| 686 | S1P_ZT_Ro  | 2 | 9.8   | 72.2 | 1.30E+06 (-) |
| 689 | S2P_ZT_Ro  | 2 | 9.79  | 75.4 | 5.06E+05 (-) |
| 701 | S5P_ZT_Ro  | 2 | 9.74  | 63.2 | 1.18E+06 (-) |
| 710 | X4P_ZT.407 | 2 | 9.69  | 76.3 | 7.69E+05 (-) |
| 712 | S1P_ZT_Ro  | 2 | 9.69  | 78.9 | 5.02E+05 (-) |
| 721 | X5P_ZT.346 | 2 | 9.64  | 70.2 | 1.57E+07 (-) |
| 732 | S5P_ZT_Ro  | 2 | 9.58  | 73.4 | 3.39E+05 (-) |
| 734 | S2P_ZT_Ro  | 2 | 9.58  | 71.3 | 1.29E+06 (-) |
| 765 | L3P_ZT.377 | 2 | 9.43  | 72   | 1.76E+06 (-) |
| 772 | L3P_ZT.418 | 2 | 9.38  | 63.7 | 3.07E+05 (-) |
| 782 | L3P_ZT.427 | 2 | 9.33  | 73.3 | 7.00E+05 (-) |
| 785 | X4P_ZT.388 | 2 | 9.29  | 94.5 | 3.30E+04 (-) |
| 799 | S5P_ZT_Ro  | 2 | 9.21  | 68.3 | 1.13E+06 (-) |
| 808 | S1P_ZT_Ro  | 2 | 9.17  | 60.9 | 4.06E+06 (-) |

|      |            |   |      |      |              |
|------|------------|---|------|------|--------------|
| 809  | L1P_ZT.31E | 2 | 9.17 | 60.5 | 1.21E+07 (-) |
| 817  | S2P_ZT_Ro  | 2 | 9.12 | 66.9 | 1.04E+06 (-) |
| 818  | L3P_ZT.367 | 2 | 9.12 | 71.7 | 1.52E+06 (-) |
| 823  | X4P_ZT.42E | 2 | 9.09 | 61.9 | 5.59E+05 (-) |
| 866  | X4P_ZT.39E | 2 | 8.92 | 85.7 | 2.48E+05 (-) |
| 870  | X3P_ZT.39E | 2 | 8.9  | 63.5 | 5.39E+05 (-) |
| 872  | X3P_ZT.40E | 2 | 8.89 | 71   | 8.82E+05 (-) |
| 878  | X4P_ZT.38E | 2 | 8.87 | 63.3 | 8.27E+05 (-) |
| 885  | L3P_ZT.41C | 2 | 8.86 | 68   | 3.58E+05 (-) |
| 888  | X4P_ZT.36E | 2 | 8.84 | 64.3 | 1.33E+06 (-) |
| 900  | L3P_ZT.37C | 2 | 8.78 | 64.1 | 8.78E+05 (-) |
| 901  | S1P_ZT_Ro  | 2 | 8.77 | 61.5 | 7.27E+05 (-) |
| 903  | L3P_ZT.44E | 2 | 8.77 | 60.6 | 8.06E+05 (-) |
| 907  | L3P_ZT.43E | 2 | 8.76 | 65.7 | 7.37E+05 (-) |
| 916  | S2P_ZT_Ro  | 2 | 8.72 | 72.5 | 1.36E+06 (-) |
| 935  | X4P_ZT.39E | 2 | 8.6  | 70.5 | 3.33E+05 (-) |
| 936  | X4P_ZT.42C | 2 | 8.6  | 72   | 3.03E+04 (-) |
| 947  | S2P_ZT_Ro  | 2 | 8.58 | 64.2 | 1.35E+06 (-) |
| 962  | S4P_ZT_Ro  | 2 | 8.5  | 68.4 | 8.42E+05 (-) |
| 980  | X4P_ZT.39E | 2 | 8.44 | 77.9 | 9.72E+05 (-) |
| 984  | X4P_ZT.36E | 2 | 8.43 | 81.8 | 2.02E+06 (-) |
| 1012 | S2P_ZT_Ro  | 2 | 8.34 | 60.9 | 7.76E+05 (-) |
| 1029 | S1P_ZT_Ro  | 2 | 8.28 | 92   | 4.30E+05 (-) |
| 1044 | X3P_ZT.40E | 2 | 8.22 | 68.8 | 8.30E+05 (-) |
| 1047 | S1P_ZT_Ro  | 2 | 8.22 | 68.2 | 7.50E+05 (-) |
| 1054 | X4P_ZT.42E | 2 | 8.18 | 62   | 5.85E+05 (-) |
| 1062 | S1P_ZT_Ro  | 2 | 8.14 | 63.4 | 3.33E+06 (-) |
| 1069 | X3P_ZT.39E | 2 | 8.11 | 60.8 | 3.32E+05 (-) |
| 1070 | S4P_ZT_Ro  | 2 | 8.11 | 64   | 2.14E+06 (-) |
| 1074 | S2P_ZT_Ro  | 2 | 8.1  | 78.3 | 6.17E+07 (-) |
| 1084 | X3P_ZT.35E | 2 | 8.07 | 64.4 | 3.35E+06 (-) |
| 1101 | X4P_ZT.38E | 2 | 8.02 | 70.5 | 1.12E+06 (-) |
| 1106 | L3P_ZT.42E | 2 | 8.02 | 68.8 | 7.26E+05 (-) |
| 1111 | X3P_ZT.36E | 2 | 7.98 | 78.6 | 1.86E+06 (-) |
| 1147 | L3P_ZT.38E | 2 | 7.86 | 63.2 | 1.36E+06 (-) |
| 1162 | L3P_ZT.40E | 2 | 7.79 | 85.2 | 5.50E+05 (-) |
| 1184 | S3P_ZT_Ro  | 2 | 7.73 | 73.1 | 9.06E+05 (-) |
| 1190 | X4P_ZT.37E | 2 | 7.7  | 72   | 3.57E+05 (-) |
| 1201 | S4P_ZT_Ro  | 2 | 7.66 | 63.9 | 1.98E+06 (-) |
| 1210 | X3P_ZT.38E | 2 | 7.64 | 68.5 | 1.12E+06 (-) |
| 1229 | S2P_ZT_Ro  | 2 | 7.56 | 79.2 | 8.44E+05 (-) |
| 1254 | X3P_ZT.40E | 2 | 7.47 | 88.2 | 9.32E+05 (-) |
| 1285 | L3P_ZT.43E | 2 | 7.38 | 94.8 | 7.85E+05 (-) |
| 1350 | X3P_ZT.37E | 2 | 7.14 | 67.5 | 1.28E+06 (-) |
| 1398 | X3P_ZT.44E | 2 | 6.99 | 69.1 | 5.75E+05 (-) |
| 1401 | X4P_ZT.43E | 2 | 6.98 | 68.2 | 5.09E+05 (-) |
| 1455 | X3P_ZT.38E | 2 | 6.84 | 82   | 9.96E+05 (-) |

|                 |   |       |      |              |
|-----------------|---|-------|------|--------------|
| 1468 X3P_ZT.410 | 2 | 6.81  | 69.5 | 6.93E+05 (-) |
| 1570 X4P_ZT.360 | 2 | 6.58  | 75.7 | 1.69E+06 (-) |
| 1635 X3P_ZT.420 | 2 | 6.45  | 74.2 | 5.73E+04 (-) |
| 1641 L3P_ZT.461 | 2 | 6.43  | 65.2 | 4.42E+04 (-) |
| 1652 X4P_ZT.420 | 2 | 6.4   | 85.1 | 3.03E+04 (-) |
| 1677 X4P_ZT.430 | 2 | 6.33  | 66.4 | 3.43E+05 (-) |
| 1691 L3P_ZT.441 | 2 | 6.3   | 80.1 | 7.96E+05 (-) |
| 1772 X3P_ZT.400 | 2 | 6.13  | 65   | 9.11E+05 (-) |
| 1794 X5P_ZT.340 | 2 | 6.08  | 86.8 | 1.57E+07 (-) |
| 1817 S3P_ZT_Ro  | 2 | 6.02  | 62.9 | 5.69E+05 (-) |
| 1839 S3P_ZT_Ro  | 2 | 5.95  | 76.6 | 7.39E+06 (-) |
| 1900 X4P_ZT.410 | 2 | 5.81  | 76.9 | 3.03E+04 (-) |
| 1920 L2P_ZT.390 | 2 | 5.77  | 76   | 2.55E+05 (-) |
| 2035 L3P_ZT.447 | 2 | 5.56  | 70.7 | 1.18E+04 (-) |
| 2096 S2P_ZT_Ro  | 2 | 5.45  | 65.7 | 1.53E+07 (-) |
| 2128 S2P_ZT_Ro  | 2 | 5.37  | 67.2 | 6.50E+05 (-) |
| 384 L3P_ZT.330  | 2 | 11.88 | 82.2 | 4.11E+04 (-) |
| 527 S4P_ZT_Ro   | 2 | 10.86 | 73.3 | 1.69E+05 (-) |
| 877 X4P_ZT.330  | 2 | 8.87  | 68.8 | 5.20E+04 (-) |
| 928 X4P_ZT.340  | 2 | 8.62  | 63.6 | 4.32E+04 (-) |
| 1032 S3P_ZT_Ro  | 2 | 8.27  | 66.5 | 6.38E+03 (-) |
| 1195 S5P_ZT_Ro  | 2 | 7.68  | 62.5 | 2.50E+04 (-) |
| 1406 X5P_ZT.300 | 2 | 6.97  | 65.2 | 3.20E+05 (-) |
| 1504 S3P_ZT_Ro  | 2 | 6.74  | 93.4 | 1.26E+05 (-) |
| 1751 S5P_ZT_Ro  | 2 | 6.19  | 91.5 | 7.54E+04 (-) |
| 2085 S5P_ZT_Ro  | 2 | 5.46  | 71   | 7.54E+04 (-) |
| 166 L3P_ZT.491  | 3 | 14.4  | 86.3 | 9.63E+04 (-) |
| 931 S2P_ZT_Ro   | 3 | 8.62  | 71.2 | 1.95E+05 (-) |
| 2018 X3P_ZT.300 | 3 | 5.59  | 76.5 | 2.90E+05 (R) |
| 1490 S1P_ZT_Ro  | 2 | 6.77  | 61.6 | 7.19E+05 (K) |
| 1599 L5P_ZT.200 | 2 | 6.52  | 61.7 | 1.59E+06 (K) |
| 2114 X2P_ZT.200 | 2 | 5.4   | 65   | 2.03E+06 (K) |
| 2274 X4P_ZT.530 | 3 | 5.12  | 64.1 | 1.04E+05 (K) |
| 961 S1P_ZT_Ro   | 4 | 8.51  | 65.7 | 2.37E+05 (K) |
| 1148 S5P_ZT_Ro  | 4 | 7.85  | 69.2 | 5.85E+04 (K) |
| 1604 S3P_ZT_Ro  | 4 | 6.51  | 61.2 | 1.41E+05 (K) |
| 1773 X2P_ZT.520 | 4 | 6.13  | 70.1 | 2.79E+05 (K) |
| 2288 S1P_ZT_Ro  | 3 | 5.1   | 85.8 | 1.56E+05 (K) |
| 1835 L5P_ZT.490 | 2 | 5.97  | 63.6 | 3.44E+06 (K) |
| 1262 X4P_ZT.480 | 7 | 7.44  | 71.8 | 8.70E+05 (K) |
| 2278 X4P_ZT.400 | 3 | 5.11  | 72.9 | 1.25E+06 (K) |
| 2319 X4P_ZT.400 | 3 | 5.02  | 74.3 | 1.25E+06 (K) |
| 1843 L3P_ZT.510 | 4 | 5.94  | 69.2 | 6.65E+04 (K) |
| 1573 L2P_ZT.410 | 6 | 6.58  | 71.4 | 7.96E+04 (D) |
| 2089 L2P_ZT.140 | 2 | 5.46  | 63.4 | 1.33E+06 (K) |
| 2055 X5P_ZT.490 | 6 | 5.52  | 61.4 | 3.04E+04 (R) |
| 1711 S2P_ZT_Ro  | 5 | 6.27  | 64   | 1.53E+06 (R) |



|                 |   |       |      |              |
|-----------------|---|-------|------|--------------|
| 1246 S2P_ZT_Ro  | 5 | 7.5   | 62.4 | 9.92E+05 (K) |
| 736 X5P_ZT.539  | 5 | 9.56  | 77.4 | 6.71E+05 (K) |
| 851 L2P_ZT.497  | 5 | 8.99  | 63.2 | 5.32E+05 (K) |
| 937 S5P_ZT_Ro   | 5 | 8.6   | 64.4 | 8.44E+05 (K) |
| 1091 X5P_ZT.539 | 5 | 8.05  | 69.6 | 2.04E+05 (K) |
| 1157 S2P_ZT_Ro  | 4 | 7.81  | 72.4 | 2.28E+04 (K) |
| 1241 L1P_ZT.508 | 5 | 7.51  | 65.9 | 5.36E+05 (K) |
| 1381 X2P_ZT.529 | 5 | 7.03  | 79   | 5.20E+05 (K) |
| 1655 L5P_ZT.522 | 5 | 6.4   | 66.2 | 7.09E+05 (K) |
| 1831 S3P_ZT_Ro  | 5 | 5.98  | 65.1 | 3.06E+05 (K) |
| 829 S2P_ZT_Ro   | 4 | 9.08  | 63.7 | 1.05E+05 (K) |
| 1687 L2P_ZT.444 | 4 | 6.31  | 74.1 | 4.82E+05 (K) |
| 1569 S3P_ZT_Ro  | 4 | 6.59  | 60.1 | 1.95E+04 (K) |
| 1704 X3P_ZT.351 | 6 | 6.28  | 66.5 | 3.70E+04 (K) |
| 1873 L3P_ZT.503 | 4 | 5.89  | 77.5 | 1.31E+04 (K) |
| 1133 L2P_ZT.298 | 4 | 7.9   | 67.2 | 1.10E+06 (D) |
| 1936 L2P_ZT.354 | 3 | 5.74  | 60.4 | 8.98E+05 (E) |
| 2068 X5P_ZT.504 | 5 | 5.49  | 78.2 | 5.15E+04 (I) |
| 1219 X3P_ZT.382 | 6 | 7.58  | 84.7 | 2.47E+05 (F) |
| 1624 L1P_ZT.364 | 6 | 6.47  | 75.5 | 3.81E+04 (F) |
| 1930 S4P_ZT_Ro  | 2 | 5.75  | 65.7 | 3.69E+06 (R) |
| 2124 L3P_ZT.524 | 2 | 5.38  | 65.6 | 8.74E+04 (R) |
| 2143 S3P_ZT_Ro  | 3 | 5.35  | 64.4 | 4.95E+04 (R) |
| 2209 S2P_ZT_Ro  | 3 | 5.24  | 81.4 | 8.11E+04 (R) |
| 2273 L3P_ZT.524 | 3 | 5.13  | 65.4 | 8.05E+04 (R) |
| 2294 S1P_ZT_Ro  | 3 | 5.09  | 66.3 | 9.19E+04 (R) |
| 749 S4P_ZT_Ro   | 6 | 9.49  | 63.4 | 1.02E+05 (S) |
| 1756 L5P_ZT.505 | 4 | 6.18  | 65.3 | 9.44E+05 (F) |
| 1890 S1P_ZT_Ro  | 7 | 5.83  | 84   | 4.45E+04 (R) |
| 1483 L2P_ZT.469 | 3 | 6.78  | 61.8 | 1.59E+05 (R) |
| 1568 L5P_ZT.494 | 3 | 6.6   | 79.8 | 1.46E+05 (R) |
| 1675 S4P_ZT_Ro  | 3 | 6.34  | 67.5 | 2.99E+04 (R) |
| 1814 L3P_ZT.491 | 3 | 6.03  | 67.2 | 2.31E+05 (R) |
| 2093 X2P_ZT.501 | 3 | 5.45  | 66.3 | 9.99E+04 (R) |
| 1215 X4P_ZT.539 | 7 | 7.61  | 64.6 | 1.27E+06 (R) |
| 1402 X2P_ZT.494 | 7 | 6.98  | 69.1 | 2.98E+06 (R) |
| 1473 X5P_ZT.501 | 7 | 6.8   | 83.2 | 4.79E+06 (R) |
| 1714 S3P_ZT_Ro  | 7 | 6.26  | 60.6 | 3.13E+05 (R) |
| 1942 L2P_ZT.516 | 7 | 5.73  | 62.7 | 3.33E+06 (R) |
| 1988 L1P_ZT.475 | 7 | 5.65  | 64.9 | 2.05E+06 (R) |
| 1977 L4P_ZT.277 | 5 | 5.66  | 64.2 | 7.85E+05 (K) |
| 1771 L2P_ZT.438 | 3 | 6.14  | 60.9 | 7.32E+04 (A) |
| 627 X1P_ZT.248  | 3 | 10.15 | 71.9 | 6.66E+05 (V) |
| 1269 X5P_ZT.256 | 3 | 7.43  | 64.8 | 1.12E+06 (V) |
| 130 S4P_ZT_Ro   | 2 | 14.92 | 81.1 | 6.22E+05 (L) |
| 222 S4P_ZT_Ro   | 2 | 13.66 | 83.9 | 6.79E+04 (L) |
| 383 S3P_ZT_Ro   | 2 | 11.88 | 69.6 | 5.26E+04 (L) |

|                 |   |       |      |              |
|-----------------|---|-------|------|--------------|
| 434 S3P_ZT_Ro   | 2 | 11.56 | 68.1 | 5.26E+04 (L) |
| 466 S4P_ZT_Ro   | 2 | 11.36 | 68.8 | 7.05E+05 (L) |
| 672 X4P_ZT.334  | 2 | 9.88  | 65.3 | 2.54E+05 (L) |
| 773 X4P_ZT.261  | 2 | 9.37  | 84   | 4.78E+05 (L) |
| 898 S3P_ZT_Ro   | 2 | 8.78  | 61.3 | 8.07E+05 (L) |
| 2165 X2P_ZT.471 | 5 | 5.31  | 68.8 | 3.91E+05 (K) |
| 2323 L5P_ZT.465 | 5 | 5.02  | 80.5 | 7.68E+05 (K) |
| 1130 L1P_ZT.358 | 5 | 7.91  | 62.3 | 5.40E+04 (K) |
| 1792 L5P_ZT.388 | 2 | 6.09  | 66.5 | 4.38E+07 (K) |
| 1797 X2P_ZT.390 | 2 | 6.07  | 66.7 | 4.75E+07 (K) |
| 1981 X5P_ZT.381 | 2 | 5.65  | 66.6 | 6.24E+07 (K) |
| 1990 X1P_ZT.361 | 2 | 5.64  | 66.4 | 9.33E+07 (K) |
| 1480 S2P_ZT_Ro  | 7 | 6.78  | 78.6 | 6.96E+04 (Q) |
| 2066 L1P_ZT.528 | 5 | 5.5   | 64.5 | 3.89E+04 (C) |
| 1457 S5P_ZT_Ro  | 3 | 6.84  | 64.7 | 1.40E+05 (C) |
| 1801 X3P_ZT.386 | 3 | 6.06  | 60.4 | 2.72E+05 (C) |
| 2164 X5P_ZT.478 | 3 | 5.31  | 64.2 | 3.75E+04 (K) |
| 1252 S4P_ZT_Ro  | 6 | 7.48  | 63   | 1.73E+04 (K) |
| 1255 S4P_ZT_Ro  | 7 | 7.47  | 70.6 | 1.54E+06 (L) |
| 1694 X4P_ZT.361 | 5 | 6.29  | 76.6 | 4.91E+05 (L) |
| 1808 S4P_ZT_Ro  | 7 | 6.05  | 60.8 | 1.54E+06 (L) |
| 1976 L1P_ZT.351 | 6 | 5.66  | 73.2 | 7.79E+05 (L) |
| 2156 X2P_ZT.376 | 5 | 5.32  | 74.9 | 8.46E+05 (L) |
| 1410 S5P_ZT_Ro  | 2 | 6.97  | 64.8 | 9.60E+05 (R) |
| 1821 S5P_ZT_Ro  | 2 | 6     | 67.3 | 9.60E+05 (R) |
| 1901 X1P_ZT.291 | 2 | 5.81  | 71.6 | 4.93E+05 (R) |
| 1945 X1P_ZT.300 | 2 | 5.72  | 75.5 | 4.93E+05 (R) |
| 2161 L4P_ZT.313 | 2 | 5.32  | 61.3 | 5.24E+05 (R) |
| 1580 X2P_ZT.534 | 7 | 6.57  | 70.3 | 4.47E+04 (R) |
| 2051 L2P_ZT.487 | 4 | 5.53  | 63.7 | 1.48E+05 (R) |
| 2107 L5P_ZT.546 | 7 | 5.42  | 61.3 | 4.89E+04 (R) |
| 237 S4P_ZT_Ro   | 2 | 13.44 | 76.9 | 2.82E+06 (V) |
| 392 X2P_ZT.291  | 2 | 11.83 | 70.1 | 2.05E+06 (V) |
| 488 X2P_ZT.294  | 2 | 11.18 | 72.2 | 2.05E+06 (V) |
| 498 L3P_ZT.282  | 2 | 11.09 | 72.5 | 1.69E+06 (V) |
| 683 S5P_ZT_Ro   | 2 | 9.8   | 80.4 | 3.35E+06 (V) |
| 723 S2P_ZT_Ro   | 2 | 9.63  | 74.5 | 3.54E+06 (V) |
| 746 L5P_ZT.292  | 2 | 9.52  | 63.6 | 2.30E+06 (V) |
| 802 X1P_ZT.274  | 2 | 9.2   | 66.6 | 1.88E+06 (V) |
| 825 L1P_ZT.266  | 2 | 9.09  | 61.1 | 3.01E+06 (V) |
| 889 S1P_ZT_Ro   | 2 | 8.84  | 65.1 | 3.88E+06 (V) |
| 1083 X3P_ZT.281 | 2 | 8.07  | 84.3 | 1.94E+06 (V) |
| 1482 L1P_ZT.252 | 4 | 6.78  | 70.6 | 6.99E+05 (L) |
| 1669 L5P_ZT.277 | 4 | 6.36  | 66.3 | 4.25E+05 (L) |
| 1671 X5P_ZT.271 | 4 | 6.34  | 68.3 | 5.53E+05 (L) |
| 2014 X2P_ZT.278 | 5 | 5.6   | 73.7 | 1.21E+06 (L) |
| 2057 S1P_ZT_Ro  | 5 | 5.52  | 61   | 9.30E+05 (L) |

|                 |   |      |      |              |
|-----------------|---|------|------|--------------|
| 2236 X2P_ZT.278 | 4 | 5.21 | 66.3 | 8.35E+05 (L) |
| 1363 L4P_ZT.205 | 3 | 7.11 | 71.8 | 4.51E+04 (D) |
| 834 X3P_ZT.888  | 2 | 9.05 | 80.3 | 2.42E+05 (A) |
| 1135 X2P_ZT.326 | 3 | 7.88 | 88.1 | 3.12E+04 (F) |
| 692 S2P_ZT_Ro   | 3 | 9.77 | 63.9 | 6.76E+06 (S) |
| 827 X3P_ZT.461  | 3 | 9.08 | 72.7 | 2.11E+06 (S) |
| 839 S4P_ZT_Ro   | 3 | 9.02 | 74   | 2.98E+06 (S) |
| 904 X4P_ZT.454  | 3 | 8.76 | 82.3 | 4.95E+06 (S) |
| 925 L1P_ZT.445  | 3 | 8.64 | 76.5 | 6.94E+06 (S) |
| 933 X2P_ZT.459  | 3 | 8.61 | 77.7 | 2.46E+06 (S) |
| 972 S5P_ZT_Ro   | 3 | 8.47 | 86   | 2.52E+06 (S) |
| 993 S3P_ZT_Ro   | 3 | 8.4  | 79.9 | 2.49E+06 (S) |
| 994 X3P_ZT.461  | 3 | 8.39 | 74.6 | 1.43E+06 (S) |
| 1170 L2P_ZT.433 | 3 | 7.77 | 89.6 | 1.72E+06 (S) |
| 1308 L4P_ZT.437 | 3 | 7.3  | 78.4 | 4.61E+06 (S) |
| 1372 X3P_ZT.451 | 3 | 7.05 | 94.2 | 2.18E+06 (S) |
| 1496 S5P_ZT_Ro  | 3 | 6.75 | 75.3 | 2.52E+06 (S) |
| 1553 L3P_ZT.461 | 3 | 6.64 | 68.8 | 1.31E+06 (S) |
| 1564 L3P_ZT.460 | 3 | 6.61 | 68.6 | 3.34E+06 (S) |
| 1660 X1P_ZT.430 | 3 | 6.37 | 77.7 | 7.22E+06 (S) |
| 1796 X3P_ZT.457 | 3 | 6.07 | 95.2 | 2.18E+06 (S) |
| 1657 X3P_ZT.211 | 3 | 6.39 | 67.4 | 2.16E+05 (S) |
| 1666 X3P_ZT.214 | 3 | 6.36 | 74.2 | 2.16E+05 (S) |
| 2135 S2P_ZT_Ro  | 4 | 5.36 | 62.4 | 2.54E+04 (R) |
| 1485 X5P_ZT.381 | 6 | 6.77 | 70   | 1.07E+05 (P) |
| 2152 X3P_ZT.501 | 3 | 5.33 | 73.6 | 7.77E+05 (K) |
| 1760 S5P_ZT_Ro  | 7 | 6.17 | 79.6 | 7.79E+04 (-) |
| 1757 X4P_ZT.211 | 4 | 6.17 | 73.2 | 1.91E+04 (-) |
| 1870 L5P_ZT.222 | 4 | 5.9  | 76.5 | 4.37E+04 (-) |
| 1962 S5P_ZT_Ro  | 4 | 5.69 | 76.6 | 3.18E+04 (-) |
| 1937 X3P_ZT.291 | 3 | 5.73 | 85.3 | 2.59E+06 (K) |
| 1355 X2P_ZT.354 | 7 | 7.13 | 67.6 | 1.21E+06 (-) |
| 2015 L1P_ZT.137 | 3 | 5.6  | 61.2 | 7.89E+04 (K) |
| 2050 L2P_ZT.133 | 3 | 5.53 | 72.9 | 1.75E+05 (K) |
| 835 X5P_ZT.543  | 4 | 9.03 | 63.2 | 2.21E+05 (K) |
| 1435 L2P_ZT.481 | 4 | 6.9  | 62.9 | 9.55E+04 (-) |
| 1946 S4P_ZT_Ro  | 5 | 5.72 | 100  | 4.42E+04 (-) |
| 2227 X2P_ZT.271 | 5 | 5.22 | 74.6 | 3.89E+06 (-) |
| 1621 S5P_ZT_Ro  | 7 | 6.47 | 100  | 6.78E+05 (-) |
| 1764 S3P_ZT_Ro  | 7 | 6.16 | 82.8 | 4.10E+05 (-) |
| 1956 S4P_ZT_Ro  | 7 | 5.71 | 62   | 1.06E+06 (-) |
| 1075 X4P_ZT.509 | 3 | 8.09 | 61.1 | 3.78E+06 (-) |
| 2217 S3P_ZT_Ro  | 6 | 5.23 | 73.6 | 1.38E+05 (-) |
| 1763 X5P_ZT.441 | 5 | 6.16 | 65.1 | 6.46E+04 (-) |
| 2269 L3P_ZT.345 | 7 | 5.14 | 74.9 | 7.10E+04 (-) |
| 1662 S4P_ZT_Ro  | 5 | 6.37 | 63.7 | 2.11E+06 (-) |
| 1715 S1P_ZT_Ro  | 5 | 6.26 | 66.6 | 1.61E+06 (-) |

|                 |   |      |      |              |
|-----------------|---|------|------|--------------|
| 1741 X3P_ZT.260 | 5 | 6.21 | 64   | 2.97E+06 (-) |
| 1761 L1P_ZT.242 | 5 | 6.17 | 66.3 | 1.01E+06 (-) |
| 2053 L5P_ZT.269 | 5 | 5.53 | 66.7 | 1.49E+06 (-) |
| 1809 S2P_ZT_Ro  | 5 | 6.05 | 66.3 | 2.47E+04 (R) |
| 1373 S2P_ZT_Ro  | 5 | 7.05 | 63.8 | 3.67E+04 (-) |
| 1615 S3P_ZT_Ro  | 3 | 6.48 | 64.8 | 6.93E+05 (R) |
| 2167 X4P_ZT.500 | 3 | 5.3  | 70   | 4.71E+04 (-) |
| 1980 L5P_ZT.375 | 3 | 5.66 | 63.3 | 3.25E+06 (-) |
| 2109 X5P_ZT.379 | 2 | 5.41 | 84.4 | 1.30E+06 (-) |
| 1818 S5P_ZT_Ro  | 3 | 6.01 | 67.3 | 6.47E+05 (-) |
| 2224 X4P_ZT.314 | 3 | 5.22 | 84.1 | 2.85E+04 (-) |
| 2203 L2P_ZT.435 | 2 | 5.25 | 100  | 1.95E+05 (-) |
| 1882 S2P_ZT_Ro  | 2 | 5.86 | 78.2 | 4.77E+05 (K) |
| 1275 L4P_ZT.177 | 2 | 7.41 | 83.4 | 3.33E+05 (K) |
| 1517 S4P_ZT_Ro  | 2 | 6.71 | 85.6 | 3.00E+05 (K) |
| 2192 S1P_ZT_Ro  | 2 | 5.26 | 63.2 | 2.06E+06 (R) |
| 1437 X2P_ZT.559 | 4 | 6.89 | 91.4 | 4.30E+04 (R) |
| 2081 L2P_ZT.482 | 6 | 5.47 | 100  | 2.25E+05 (R) |
| 779 X2P_ZT.170  | 2 | 9.34 | 64.3 | 3.81E+06 (K) |
| 2328 L4P_ZT.440 | 2 | 5.01 | 64.5 | 1.03E+05 (K) |
| 1729 L4P_ZT.384 | 2 | 6.23 | 71.3 | 1.69E+04 (K) |
| 2032 S1P_ZT_Ro  | 2 | 5.56 | 74.4 | 6.62E+05 (K) |
| 2219 L2P_ZT.372 | 2 | 5.23 | 61.9 | 4.47E+05 (K) |
| 1617 L3P_ZT.536 | 4 | 6.48 | 77.8 | 1.09E+05 (K) |
| 2187 L5P_ZT.541 | 4 | 5.27 | 70.2 | 7.73E+04 (K) |
| 986 X3P_ZT.500  | 2 | 8.42 | 62.8 | 1.67E+06 (K) |
| 1637 L2P_ZT.479 | 2 | 6.44 | 68.3 | 1.72E+06 (K) |
| 1759 X1P_ZT.469 | 2 | 6.17 | 60.5 | 1.14E+06 (K) |
| 1863 L5P_ZT.504 | 2 | 5.91 | 74.1 | 1.45E+06 (K) |
| 2041 S3P_ZT_Ro  | 2 | 5.54 | 62.3 | 2.10E+06 (K) |
| 2060 L4P_ZT.371 | 3 | 5.51 | 74.5 | 3.58E+06 (K) |
| 2099 X4P_ZT.500 | 2 | 5.43 | 62.3 | 1.49E+06 (K) |
| 2126 X2P_ZT.380 | 3 | 5.37 | 100  | 3.72E+06 (K) |
| 1803 S4P_ZT_Ro  | 2 | 6.06 | 67.6 | 2.27E+05 (K) |
| 2303 X2P_ZT.510 | 2 | 5.06 | 79.3 | 5.22E+04 (K) |
| 1244 X2P_ZT.310 | 2 | 7.5  | 85.9 | 5.80E+04 (K) |
| 1738 L3P_ZT.417 | 3 | 6.22 | 100  | 4.69E+06 (K) |
| 758 S1P_ZT_Ro   | 3 | 9.44 | 69.9 | 6.06E+06 (K) |
| 805 L2P_ZT.449  | 3 | 9.18 | 72.3 | 8.96E+05 (K) |
| 1253 S1P_ZT_Ro  | 3 | 7.48 | 69.1 | 6.06E+06 (K) |
| 1331 L1P_ZT.459 | 3 | 7.21 | 68.7 | 2.20E+06 (K) |
| 1356 S2P_ZT_Ro  | 3 | 7.13 | 60.4 | 7.84E+05 (K) |
| 1475 X1P_ZT.444 | 3 | 6.8  | 70.5 | 1.05E+07 (K) |
| 1511 L4P_ZT.450 | 3 | 6.73 | 63.1 | 3.14E+06 (K) |
| 1542 X4P_ZT.470 | 3 | 6.65 | 67   | 4.99E+05 (K) |
| 1875 S5P_ZT_Ro  | 3 | 5.88 | 63.1 | 1.40E+06 (K) |
| 1888 X1P_ZT.440 | 3 | 5.83 | 70.5 | 1.05E+07 (K) |

|                 |   |       |      |              |
|-----------------|---|-------|------|--------------|
| 1918 S5P_ZT_Ro  | 3 | 5.77  | 65   | 1.40E+06 (K) |
| 2065 S3P_ZT_Ro  | 5 | 5.5   | 100  | 5.88E+04 (R) |
| 2201 S1P_ZT_Ro  | 5 | 5.25  | 100  | 5.99E+04 (R) |
| 2120 L2P_ZT.368 | 3 | 5.39  | 78.6 | 8.22E+06 (R) |
| 1462 S5P_ZT_Ro  | 4 | 6.83  | 61.4 | 1.59E+05 (K) |
| 1739 L4P_ZT.481 | 4 | 6.22  | 100  | 4.54E+04 (K) |
| 2182 L3P_ZT.399 | 5 | 5.28  | 62   | 5.15E+05 (K) |
| 1327 L4P_ZT.492 | 7 | 7.22  | 76   | 5.02E+04 (N) |
| 1840 X4P_ZT.550 | 7 | 5.94  | 60.9 | 2.83E+06 (N) |
| 294 S4P_ZT_Ro   | 2 | 12.7  | 89.7 | 7.18E+05 (R) |
| 317 S2P_ZT_Ro   | 2 | 12.55 | 85.9 | 1.08E+06 (R) |
| 424 S3P_ZT_Ro   | 2 | 11.64 | 86.4 | 1.21E+06 (R) |
| 592 L3P_ZT.910  | 2 | 10.39 | 64   | 1.01E+06 (R) |
| 717 L3P_ZT.893  | 2 | 9.67  | 67.7 | 1.01E+06 (R) |
| 1066 X4P_ZT.833 | 2 | 8.13  | 80   | 9.29E+05 (R) |
| 1384 S3P_ZT_Ro  | 2 | 7.02  | 75.7 | 1.21E+06 (R) |
| 1607 S3P_ZT_Ro  | 2 | 6.5   | 65.1 | 1.21E+06 (R) |
| 80 S1P_ZT_Ro    | 2 | 16.09 | 96.7 | 1.56E+07 (R) |
| 86 S2P_ZT_Ro    | 2 | 15.84 | 96.7 | 1.76E+07 (R) |
| 137 S3P_ZT_Ro   | 2 | 14.83 | 95.9 | 2.24E+07 (R) |
| 165 S4P_ZT_Ro   | 2 | 14.42 | 100  | 2.67E+07 (R) |
| 169 L3P_ZT.176  | 2 | 14.3  | 94.7 | 4.07E+07 (R) |
| 282 X4P_ZT.170  | 2 | 12.79 | 94.3 | 1.41E+07 (R) |
| 551 L1P_ZT.164  | 2 | 10.72 | 77.8 | 1.73E+06 (R) |
| 586 X2P_ZT.175  | 2 | 10.4  | 90.9 | 2.22E+06 (R) |
| 1045 X1P_ZT.174 | 2 | 8.22  | 71.9 | 7.19E+06 (R) |
| 1294 X5P_ZT.175 | 2 | 7.33  | 64.2 | 1.91E+06 (R) |
| 1598 L4P_ZT.186 | 2 | 6.52  | 80.8 | 9.98E+05 (R) |
| 941 L2P_ZT.313  | 3 | 8.59  | 62.6 | 1.52E+06 (G) |
| 156 L3P_ZT.108  | 2 | 14.57 | 82.6 | 1.38E+07 (G) |
| 236 S1P_ZT_Ro   | 2 | 13.45 | 86.2 | 1.42E+07 (G) |
| 344 S3P_ZT_Ro   | 2 | 12.34 | 80.6 | 6.88E+06 (G) |
| 347 S4P_ZT_Ro   | 2 | 12.29 | 76.6 | 1.08E+07 (G) |
| 523 S4P_ZT_Ro   | 2 | 10.89 | 73.5 | 1.08E+07 (G) |
| 623 S5P_ZT_Ro   | 2 | 10.2  | 76.3 | 1.59E+07 (G) |
| 1009 S4P_ZT_Ro  | 2 | 8.34  | 62.3 | 9.36E+06 (G) |
| 932 X3P_ZT.563  | 3 | 8.61  | 67.1 | 3.22E+05 (R) |
| 1004 X4P_ZT.573 | 2 | 8.36  | 70.2 | 2.95E+05 (R) |
| 1041 X4P_ZT.570 | 3 | 8.23  | 67.5 | 2.83E+05 (R) |
| 1086 S2P_ZT_Ro  | 3 | 8.07  | 63.8 | 5.52E+05 (R) |
| 1207 X4P_ZT.120 | 2 | 7.65  | 72.7 | 7.90E+05 (R) |
| 1354 L3P_ZT.649 | 2 | 7.14  | 77.4 | 3.62E+05 (R) |
| 146 S4P_ZT_Ro   | 2 | 14.69 | 81.6 | 2.79E+06 (R) |
| 208 S2P_ZT_Ro   | 2 | 13.82 | 74.2 | 2.79E+06 (R) |
| 268 L3P_ZT.128  | 2 | 13.04 | 83.1 | 6.88E+05 (R) |
| 305 S5P_ZT_Ro   | 2 | 12.6  | 84.1 | 2.59E+06 (R) |
| 429 S3P_ZT_Ro   | 2 | 11.59 | 77.8 | 4.75E+06 (R) |

|      |            |   |       |      |              |
|------|------------|---|-------|------|--------------|
| 437  | S5P_ZT_Ro  | 3 | 11.54 | 78.7 | 7.14E+06 (R) |
| 440  | S3P_ZT_Ro  | 3 | 11.53 | 82.2 | 8.06E+06 (R) |
| 459  | S1P_ZT_Ro  | 2 | 11.4  | 76.8 | 2.93E+06 (R) |
| 480  | X3P_ZT.12  | 3 | 11.24 | 77   | 4.57E+06 (R) |
| 509  | X4P_ZT.11  | 2 | 10.96 | 73.2 | 1.71E+06 (R) |
| 575  | S1P_ZT_Ro  | 2 | 10.47 | 73.6 | 2.93E+06 (R) |
| 660  | S4P_ZT_Ro  | 3 | 9.95  | 74.7 | 7.10E+06 (R) |
| 704  | L3P_ZT.12  | 3 | 9.72  | 72.7 | 5.49E+06 (R) |
| 708  | S3P_ZT_Ro  | 2 | 9.7   | 76.3 | 4.75E+06 (R) |
| 730  | X3P_ZT.12  | 2 | 9.58  | 70.7 | 2.56E+06 (R) |
| 739  | S5P_ZT_Ro  | 2 | 9.56  | 65.6 | 2.59E+06 (R) |
| 745  | S2P_ZT_Ro  | 3 | 9.52  | 72.1 | 7.59E+06 (R) |
| 886  | X3P_ZT.11  | 3 | 8.85  | 65.9 | 4.57E+06 (R) |
| 1203 | S1P_ZT_Ro  | 3 | 7.66  | 61.8 | 7.82E+06 (R) |
| 1265 | S2P_ZT_Ro  | 2 | 7.44  | 61.2 | 2.79E+06 (R) |
| 1351 | X2P_ZT.12  | 3 | 7.14  | 69.2 | 1.98E+05 (R) |
| 1502 | X4P_ZT.12  | 3 | 6.74  | 67.1 | 5.43E+06 (R) |
| 1112 | S4P_ZT_Ro  | 4 | 7.98  | 62.2 | 2.18E+05 (D) |
| 1239 | S5P_ZT_Ro  | 3 | 7.52  | 73.5 | 2.07E+05 (D) |
| 1609 | L3P_ZT.21  | 5 | 6.5   | 63.2 | 2.56E+07 (V) |
| 2205 | X5P_ZT.21  | 5 | 5.24  | 68.1 | 2.56E+07 (V) |
| 1232 | L3P_ZT.43  | 3 | 7.56  | 79   | 8.52E+04 (P) |
| 1281 | L1P_ZT.411 | 3 | 7.39  | 64.7 | 1.42E+06 (P) |
| 1456 | X1P_ZT.41  | 3 | 6.84  | 63.6 | 2.87E+05 (P) |
| 1709 | S4P_ZT_Ro  | 3 | 6.27  | 76.8 | 7.42E+05 (P) |
| 1699 | S3P_ZT_Ro  | 2 | 6.29  | 91.4 | 3.90E+05 (K) |
| 1813 | S5P_ZT_Ro  | 2 | 6.03  | 62.9 | 7.07E+05 (K) |
| 2146 | S2P_ZT_Ro  | 3 | 5.34  | 61.5 | 3.14E+04 (K) |
| 1366 | X4P_ZT.23  | 3 | 7.08  | 77.6 | 3.24E+05 (K) |
| 945  | S5P_ZT_Ro  | 4 | 8.58  | 70.7 | 3.66E+05 (K) |
| 1916 | S2P_ZT_Ro  | 3 | 5.78  | 66.8 | 6.61E+04 (K) |
| 1412 | X2P_ZT.42  | 4 | 6.96  | 81   | 4.08E+04 (K) |
| 1848 | L4P_ZT.44  | 4 | 5.93  | 73   | 6.12E+04 (K) |
| 2116 | L3P_ZT.39  | 4 | 5.4   | 67.7 | 1.69E+05 (K) |
| 863  | L1P_ZT.38  | 3 | 8.94  | 75.1 | 2.82E+05 (K) |
| 893  | S2P_ZT_Ro  | 3 | 8.81  | 71.4 | 3.15E+05 (K) |
| 1299 | X1P_ZT.50  | 4 | 7.31  | 64.7 | 4.91E+05 (K) |
| 1903 | X3P_ZT.42  | 3 | 5.8   | 62   | 2.94E+05 (K) |
| 1664 | L3P_ZT.50  | 5 | 6.37  | 100  | 1.47E+05 (R) |
| 1430 | L2P_ZT.51  | 4 | 6.92  | 75   | 3.63E+04 (K) |
| 2022 | L4P_ZT.49  | 4 | 5.59  | 69.2 | 1.45E+04 (K) |
| 2216 | S4P_ZT_Ro  | 4 | 5.23  | 67.8 | 1.27E+05 (K) |
| 2259 | X2P_ZT.54  | 4 | 5.16  | 64.6 | 6.74E+04 (K) |
| 491  | L5P_ZT.36  | 4 | 11.18 | 64   | 3.60E+07 (M) |
| 502  | X1P_ZT.33  | 4 | 11.03 | 65.7 | 4.13E+07 (M) |
| 519  | X3P_ZT.35  | 4 | 10.92 | 61.9 | 3.67E+07 (M) |
| 574  | S5P_ZT_Ro  | 4 | 10.49 | 62.9 | 4.24E+07 (M) |

|                 |   |       |      |              |
|-----------------|---|-------|------|--------------|
| 768 S2P_ZT_Ro   | 4 | 9.41  | 61.4 | 3.15E+07 (M) |
| 780 L1P_ZT.339  | 4 | 9.34  | 66.4 | 5.70E+07 (M) |
| 789 L3P_ZT.355  | 4 | 9.27  | 65.6 | 4.55E+07 (M) |
| 793 S1P_ZT_Ro   | 4 | 9.26  | 64.5 | 3.15E+07 (M) |
| 800 S3P_ZT_Ro   | 4 | 9.21  | 62.2 | 3.15E+07 (M) |
| 854 X5P_ZT.364  | 4 | 8.97  | 64   | 3.02E+07 (M) |
| 911 L4P_ZT.354  | 4 | 8.74  | 60.3 | 3.66E+07 (M) |
| 1126 X4P_ZT.357 | 4 | 7.92  | 60.6 | 3.09E+07 (M) |
| 1259 S4P_ZT_Ro  | 4 | 7.45  | 61.1 | 3.38E+07 (M) |
| 1528 X1P_ZT.344 | 4 | 6.69  | 63.3 | 4.13E+07 (M) |
| 2082 L2P_ZT.484 | 3 | 5.47  | 100  | 3.29E+06 (A) |
| 190 L3P_ZT.846  | 3 | 14.06 | 81.4 | 3.75E+07 (R) |
| 221 S3P_ZT_Ro   | 3 | 13.67 | 83.5 | 3.05E+07 (R) |
| 245 S2P_ZT_Ro   | 3 | 13.36 | 83.2 | 4.28E+07 (R) |
| 265 S4P_ZT_Ro   | 3 | 13.1  | 84.6 | 2.51E+07 (R) |
| 301 S5P_ZT_Ro   | 3 | 12.63 | 85.4 | 3.75E+07 (R) |
| 306 S3P_ZT_Ro   | 2 | 12.6  | 90.3 | 3.83E+07 (R) |
| 314 S1P_ZT_Ro   | 2 | 12.57 | 90.4 | 5.52E+07 (R) |
| 324 L3P_ZT.831  | 3 | 12.49 | 60.3 | 3.75E+07 (R) |
| 329 L3P_ZT.830  | 2 | 12.44 | 93.3 | 4.89E+07 (R) |
| 333 X4P_ZT.743  | 3 | 12.41 | 80.9 | 3.21E+07 (R) |
| 363 S2P_ZT_Ro   | 2 | 12.13 | 92.5 | 5.75E+07 (R) |
| 395 X4P_ZT.753  | 2 | 11.82 | 91   | 3.97E+07 (R) |
| 415 X3P_ZT.748  | 3 | 11.7  | 100  | 2.71E+07 (R) |
| 433 S5P_ZT_Ro   | 2 | 11.56 | 91.7 | 9.32E+07 (R) |
| 439 X4P_ZT.773  | 3 | 11.53 | 70.9 | 3.21E+07 (R) |
| 446 S1P_ZT_Ro   | 3 | 11.5  | 83.1 | 5.80E+07 (R) |
| 467 X5P_ZT.748  | 2 | 11.35 | 86.9 | 3.09E+07 (R) |
| 522 S4P_ZT_Ro   | 2 | 10.89 | 92.6 | 1.16E+08 (R) |
| 607 L4P_ZT.960  | 2 | 10.29 | 77.4 | 7.80E+06 (R) |
| 615 X2P_ZT.783  | 2 | 10.22 | 81.6 | 1.61E+07 (R) |
| 816 X2P_ZT.803  | 3 | 9.12  | 65.4 | 1.81E+07 (R) |
| 1460 X4P_ZT.743 | 2 | 6.83  | 68.3 | 8.02E+07 (R) |
| 1721 L2P_ZT.793 | 2 | 6.25  | 73.3 | 2.03E+07 (R) |
| 1914 S5P_ZT_Ro  | 2 | 5.78  | 65   | 9.32E+07 (R) |
| 2170 L1P_ZT.255 | 3 | 5.3   | 63.6 | 1.66E+07 (R) |
| 1222 S5P_ZT_Ro  | 3 | 7.57  | 66.6 | 9.43E+04 (I) |
| 1312 X5P_ZT.113 | 2 | 7.26  | 72.6 | 1.42E+05 (K) |
| 2155 X3P_ZT.113 | 2 | 5.32  | 66.2 | 2.99E+04 (K) |
| 1917 L2P_ZT.518 | 3 | 5.78  | 65.4 | 1.07E+05 (A) |
| 1834 L3P_ZT.488 | 6 | 5.97  | 66.1 | 4.53E+04 (I) |
| 2012 L3P_ZT.363 | 6 | 5.61  | 60.3 | 1.54E+05 (K) |
| 869 L4P_ZT.308  | 3 | 8.91  | 60.8 | 1.37E+05 (Y) |
| 1413 S4P_ZT_Ro  | 7 | 6.96  | 78.8 | 1.42E+05 (R) |
| 1648 S4P_ZT_Ro  | 4 | 6.41  | 63.8 | 5.01E+06 (R) |
| 2063 S5P_ZT_Ro  | 4 | 5.5   | 65.3 | 4.25E+06 (R) |
| 1550 L5P_ZT.510 | 6 | 6.65  | 60.3 | 1.95E+05 (R) |

|                 |   |       |      |              |
|-----------------|---|-------|------|--------------|
| 1619 X5P_ZT.524 | 6 | 6.47  | 100  | 1.54E+05 (R) |
| 1953 X5P_ZT.524 | 6 | 5.71  | 77.7 | 1.72E+05 (R) |
| 2078 X1P_ZT.474 | 6 | 5.47  | 73.1 | 1.61E+05 (R) |
| 579 X2P_ZT.383  | 5 | 10.45 | 74   | 2.81E+05 (K) |
| 448 S1P_ZT_Ro   | 2 | 11.48 | 82.3 | 9.74E+04 (L) |
| 548 S4P_ZT_Ro   | 2 | 10.76 | 74   | 6.35E+05 (L) |
| 585 X3P_ZT.165  | 2 | 10.41 | 66.7 | 8.71E+05 (L) |
| 685 S2P_ZT_Ro   | 2 | 9.8   | 71.2 | 5.22E+04 (L) |
| 748 S4P_ZT_Ro   | 2 | 9.5   | 71.9 | 6.35E+05 (L) |
| 814 S1P_ZT_Ro   | 2 | 9.13  | 66.2 | 1.25E+06 (L) |
| 951 L3P_ZT.328  | 2 | 8.57  | 71   | 5.99E+04 (L) |
| 1013 S2P_ZT_Ro  | 2 | 8.33  | 74.5 | 7.35E+05 (L) |
| 1068 X3P_ZT.330 | 2 | 8.11  | 67.9 | 1.64E+05 (L) |
| 1532 L5P_ZT.233 | 2 | 6.69  | 73.5 | 5.23E+06 (K) |
| 1563 L4P_ZT.265 | 3 | 6.62  | 100  | 1.10E+06 (L) |
| 210 S4P_ZT_Ro   | 3 | 13.8  | 67.9 | 5.85E+06 (R) |
| 289 S2P_ZT_Ro   | 4 | 12.75 | 86.5 | 2.81E+06 (R) |
| 369 S2P_ZT_Ro   | 3 | 12.05 | 70.9 | 6.37E+06 (R) |
| 382 S4P_ZT_Ro   | 4 | 11.88 | 68.7 | 1.93E+06 (R) |
| 549 S3P_ZT_Ro   | 4 | 10.76 | 61.7 | 1.97E+06 (R) |
| 606 S3P_ZT_Ro   | 4 | 10.29 | 65.2 | 1.97E+06 (R) |
| 964 S3P_ZT_Ro   | 3 | 8.5   | 76.4 | 4.85E+06 (R) |
| 1230 S2P_ZT_Ro  | 2 | 7.56  | 88   | 8.77E+05 (R) |
| 1272 S5P_ZT_Ro  | 2 | 7.42  | 65.4 | 3.84E+05 (R) |
| 1923 S5P_ZT_Ro  | 3 | 5.76  | 61.9 | 3.04E+06 (R) |
| 1961 S4P_ZT_Ro  | 2 | 5.7   | 61.1 | 1.69E+07 (R) |
| 1986 S4P_ZT_Ro  | 4 | 5.65  | 87.4 | 1.93E+06 (R) |
| 92 X4P_ZT.125   | 3 | 15.63 | 90.2 | 5.88E+05 (R) |
| 218 L3P_ZT.131  | 3 | 13.69 | 80   | 5.57E+05 (R) |
| 251 S4P_ZT_Ro   | 3 | 13.29 | 81.4 | 4.42E+05 (R) |
| 315 L3P_ZT.143  | 4 | 12.56 | 76.2 | 6.19E+04 (R) |
| 321 S1P_ZT_Ro   | 4 | 12.51 | 94.9 | 9.23E+05 (R) |
| 398 S1P_ZT_Ro   | 3 | 11.81 | 79.3 | 1.86E+05 (R) |
| 593 S4P_ZT_Ro   | 3 | 10.38 | 77.7 | 4.42E+05 (R) |
| 669 S1P_ZT_Ro   | 3 | 9.91  | 87.8 | 1.86E+05 (R) |
| 840 S3P_ZT_Ro   | 3 | 9.02  | 64.5 | 1.99E+05 (R) |
| 849 S3P_ZT_Ro   | 4 | 8.99  | 70.7 | 1.00E+06 (R) |
| 950 S3P_ZT_Ro   | 4 | 8.57  | 72.9 | 3.51E+05 (R) |
| 1008 X4P_ZT.125 | 2 | 8.34  | 61.5 | 1.59E+05 (R) |
| 1159 S4P_ZT_Ro  | 4 | 7.8   | 82.4 | 5.55E+05 (R) |
| 1271 S2P_ZT_Ro  | 4 | 7.43  | 90.3 | 2.01E+06 (R) |
| 1415 X4P_ZT.125 | 5 | 6.95  | 73.1 | 1.37E+05 (R) |
| 1459 S2P_ZT_Ro  | 5 | 6.84  | 60.2 | 2.20E+05 (R) |
| 1520 L3P_ZT.132 | 2 | 6.71  | 71   | 5.21E+04 (R) |
| 1539 S2P_ZT_Ro  | 4 | 6.66  | 73.6 | 5.95E+05 (R) |
| 1562 S4P_ZT_Ro  | 4 | 6.62  | 62   | 1.24E+06 (R) |
| 2070 L3P_ZT.140 | 4 | 5.49  | 65.7 | 1.48E+05 (R) |



|                 |   |       |      |              |
|-----------------|---|-------|------|--------------|
| 57 S4P_ZT_Ro    | 3 | 17.05 | 89.6 | 6.14E+06 (R) |
| 73 L3P_ZT.187   | 4 | 16.26 | 94.5 | 4.03E+07 (R) |
| 107 S2P_ZT_Ro   | 4 | 15.34 | 90.8 | 7.79E+06 (R) |
| 160 X4P_ZT.18:  | 3 | 14.48 | 94.8 | 6.24E+06 (R) |
| 191 X4P_ZT.19:  | 4 | 14.04 | 78.1 | 3.55E+06 (R) |
| 193 S4P_ZT_Ro   | 5 | 14.02 | 95.9 | 2.08E+06 (R) |
| 204 S2P_ZT_Ro   | 5 | 13.88 | 86.5 | 2.51E+06 (R) |
| 215 L3P_ZT.194  | 3 | 13.71 | 80.7 | 1.49E+06 (R) |
| 220 S4P_ZT_Ro   | 2 | 13.67 | 80   | 1.39E+06 (R) |
| 231 S1P_ZT_Ro   | 3 | 13.56 | 82.5 | 2.92E+06 (R) |
| 267 S3P_ZT_Ro   | 3 | 13.08 | 95.3 | 1.41E+06 (R) |
| 299 S3P_ZT_Ro   | 3 | 12.64 | 87   | 1.41E+06 (R) |
| 457 S4P_ZT_Ro   | 4 | 11.41 | 76.5 | 1.51E+07 (R) |
| 489 S3P_ZT_Ro   | 4 | 11.18 | 94   | 6.50E+05 (R) |
| 556 S2P_ZT_Ro   | 3 | 10.67 | 76.3 | 4.40E+06 (R) |
| 571 S3P_ZT_Ro   | 5 | 10.53 | 72.9 | 9.31E+05 (R) |
| 591 L3P_ZT.192  | 4 | 10.39 | 77.3 | 3.32E+06 (R) |
| 598 S4P_ZT_Ro   | 2 | 10.35 | 60.6 | 3.41E+04 (R) |
| 639 L3P_ZT.186  | 3 | 10.07 | 75.5 | 1.22E+07 (R) |
| 662 X4P_ZT.18:  | 4 | 9.94  | 71.3 | 1.91E+07 (R) |
| 838 S4P_ZT_Ro   | 2 | 9.02  | 70.6 | 1.39E+06 (R) |
| 852 S4P_ZT_Ro   | 2 | 8.98  | 69.4 | 1.39E+06 (R) |
| 894 S1P_ZT_Ro   | 2 | 8.8   | 70.5 | 2.65E+05 (R) |
| 927 S1P_ZT_Ro   | 2 | 8.63  | 75.8 | 2.65E+05 (R) |
| 968 S1P_ZT_Ro   | 5 | 8.49  | 76.7 | 1.87E+06 (R) |
| 970 X4P_ZT.19:  | 3 | 8.47  | 60.9 | 1.40E+06 (R) |
| 975 X4P_ZT.18:  | 2 | 8.46  | 64.2 | 9.90E+05 (R) |
| 1002 L3P_ZT.186 | 4 | 8.37  | 66.5 | 4.03E+07 (R) |
| 1010 S3P_ZT_Ro  | 2 | 8.34  | 63.2 | 7.02E+04 (R) |
| 1073 S2P_ZT_Ro  | 2 | 8.1   | 64.6 | 5.94E+05 (R) |
| 1088 S2P_ZT_Ro  | 2 | 8.06  | 71   | 5.94E+05 (R) |
| 1168 S4P_ZT_Ro  | 2 | 7.77  | 65.4 | 1.39E+06 (R) |
| 1213 S2P_ZT_Ro  | 5 | 7.62  | 69   | 2.51E+06 (R) |
| 1280 X2P_ZT.190 | 4 | 7.39  | 61.7 | 6.86E+05 (R) |
| 1329 S3P_ZT_Ro  | 5 | 7.21  | 77.2 | 9.31E+05 (R) |
| 1541 X4P_ZT.19: | 2 | 6.65  | 62.5 | 2.43E+05 (R) |
| 2004 S3P_ZT_Ro  | 3 | 5.62  | 65.1 | 1.41E+06 (R) |
| 2145 S3P_ZT_Ro  | 4 | 5.34  | 78.3 | 6.50E+05 (R) |
| 2289 L3P_ZT.194 | 2 | 5.1   | 84.9 | 1.48E+05 (R) |
| 14 S4P_ZT_Ro    | 3 | 19.96 | 93.5 | 1.32E+07 (R) |
| 39 S3P_ZT_Ro    | 3 | 17.97 | 88.7 | 6.04E+06 (R) |
| 94 S5P_ZT_Ro    | 3 | 15.6  | 86.2 | 8.08E+06 (R) |
| 101 X3P_ZT.504  | 3 | 15.47 | 85.6 | 1.71E+07 (R) |
| 110 S2P_ZT_Ro   | 3 | 15.32 | 85.9 | 1.50E+07 (R) |
| 252 S1P_ZT_Ro   | 3 | 13.26 | 86.2 | 3.66E+07 (R) |
| 397 S1P_ZT_Ro   | 3 | 11.82 | 69.2 | 3.66E+07 (R) |
| 413 X4P_ZT.51:  | 3 | 11.72 | 70   | 1.11E+07 (R) |

|                 |   |       |      |              |
|-----------------|---|-------|------|--------------|
| 423 S2P_ZT_Ro   | 3 | 11.65 | 78.6 | 1.50E+07 (R) |
| 562 L3P_ZT.598  | 3 | 10.64 | 75.1 | 2.50E+07 (R) |
| 642 S5P_ZT_Ro   | 3 | 10.03 | 66.6 | 8.08E+06 (R) |
| 652 L3P_ZT.597  | 4 | 9.99  | 73.6 | 2.80E+07 (R) |
| 909 S3P_ZT_Ro   | 4 | 8.74  | 60.3 | 1.30E+07 (R) |
| 1042 S4P_ZT_Ro  | 3 | 8.23  | 66.5 | 1.32E+07 (R) |
| 1291 S1P_ZT_Ro  | 4 | 7.35  | 61   | 2.92E+06 (R) |
| 82 X4P_ZT.104   | 4 | 15.94 | 91.6 | 1.73E+06 (R) |
| 112 L3P_ZT.111  | 4 | 15.23 | 83.8 | 3.85E+06 (R) |
| 281 S5P_ZT_Ro   | 3 | 12.8  | 70.2 | 1.01E+06 (R) |
| 304 S5P_ZT_Ro   | 3 | 12.61 | 79.8 | 1.01E+06 (R) |
| 308 S5P_ZT_Ro   | 4 | 12.59 | 78.1 | 4.94E+06 (R) |
| 332 L3P_ZT.110  | 5 | 12.42 | 100  | 1.99E+06 (R) |
| 375 S5P_ZT_Ro   | 4 | 11.96 | 72.9 | 4.94E+06 (R) |
| 537 X3P_ZT.104  | 4 | 10.8  | 75.8 | 4.51E+06 (R) |
| 613 S5P_ZT_Ro   | 4 | 10.23 | 80.1 | 1.06E+05 (R) |
| 760 S4P_ZT_Ro   | 4 | 9.43  | 91.6 | 3.96E+04 (R) |
| 856 X3P_ZT.103  | 2 | 8.96  | 67.5 | 6.17E+04 (R) |
| 860 S4P_ZT_Ro   | 3 | 8.95  | 67.5 | 5.42E+05 (R) |
| 897 S5P_ZT_Ro   | 5 | 8.78  | 69.5 | 4.12E+06 (R) |
| 926 X3P_ZT.103  | 5 | 8.63  | 71.9 | 2.76E+06 (R) |
| 966 S5P_ZT_Ro   | 4 | 8.49  | 66.2 | 4.94E+06 (R) |
| 1000 L3P_ZT.110 | 3 | 8.37  | 70.7 | 7.11E+05 (R) |
| 1061 S4P_ZT_Ro  | 3 | 8.14  | 63.7 | 5.42E+05 (R) |
| 1352 S4P_ZT_Ro  | 3 | 7.14  | 65.2 | 5.42E+05 (R) |
| 1726 X3P_ZT.103 | 4 | 6.23  | 77.2 | 1.42E+05 (R) |
| 2314 X3P_ZT.103 | 5 | 5.03  | 67.6 | 2.47E+05 (R) |
| 85 X3P_ZT.139   | 3 | 15.84 | 92.8 | 8.99E+06 (R) |
| 103 S5P_ZT_Ro   | 3 | 15.44 | 88.6 | 8.71E+05 (R) |
| 117 S2P_ZT_Ro   | 3 | 15.16 | 93.4 | 4.77E+06 (R) |
| 120 X4P_ZT.144  | 3 | 15.04 | 88.5 | 5.85E+06 (R) |
| 127 X3P_ZT.158  | 3 | 14.95 | 100  | 1.64E+06 (R) |
| 132 S1P_ZT_Ro   | 3 | 14.91 | 92.4 | 2.96E+06 (R) |
| 136 S4P_ZT_Ro   | 3 | 14.84 | 90.4 | 4.46E+06 (R) |
| 152 S2P_ZT_Ro   | 5 | 14.6  | 87   | 1.35E+07 (R) |
| 174 L3P_ZT.149  | 3 | 14.24 | 83.9 | 6.56E+06 (R) |
| 189 S5P_ZT_Ro   | 3 | 14.07 | 90.4 | 7.27E+06 (R) |
| 194 S5P_ZT_Ro   | 2 | 13.99 | 72.9 | 1.57E+05 (R) |
| 201 S2P_ZT_Ro   | 4 | 13.9  | 83.6 | 2.69E+06 (R) |
| 207 S3P_ZT_Ro   | 3 | 13.85 | 92.6 | 1.54E+06 (R) |
| 214 S2P_ZT_Ro   | 3 | 13.74 | 81.6 | 7.60E+05 (R) |
| 243 X3P_ZT.143  | 3 | 13.37 | 93.8 | 8.96E+06 (R) |
| 244 S4P_ZT_Ro   | 3 | 13.37 | 80.5 | 8.28E+05 (R) |
| 258 X4P_ZT.140  | 3 | 13.2  | 87.7 | 5.85E+06 (R) |
| 260 L3P_ZT.163  | 3 | 13.19 | 74.4 | 1.02E+06 (R) |
| 284 S4P_ZT_Ro   | 4 | 12.78 | 78.8 | 1.46E+07 (R) |
| 316 S5P_ZT_Ro   | 4 | 12.55 | 87.5 | 2.48E+07 (R) |

|     |            |   |       |      |              |
|-----|------------|---|-------|------|--------------|
| 320 | L3P_ZT.149 | 4 | 12.52 | 79.8 | 2.95E+07 (R) |
| 325 | X3P_ZT.146 | 3 | 12.48 | 86.3 | 8.99E+06 (R) |
| 327 | S2P_ZT_Ro  | 4 | 12.47 | 86.3 | 1.59E+07 (R) |
| 334 | S5P_ZT_Ro  | 5 | 12.4  | 86.2 | 2.10E+07 (R) |
| 341 | S3P_ZT_Ro  | 3 | 12.36 | 81.1 | 4.29E+05 (R) |
| 348 | L3P_ZT.163 | 2 | 12.29 | 81.5 | 2.25E+05 (R) |
| 355 | S1P_ZT_Ro  | 4 | 12.2  | 82.4 | 2.05E+06 (R) |
| 361 | X4P_ZT.144 | 4 | 12.15 | 77   | 2.08E+07 (R) |
| 372 | S1P_ZT_Ro  | 2 | 11.99 | 76.5 | 6.11E+05 (R) |
| 376 | S4P_ZT_Ro  | 5 | 11.94 | 81.8 | 9.82E+06 (R) |
| 388 | X3P_ZT.160 | 3 | 11.85 | 78.1 | 1.64E+06 (R) |
| 405 | X4P_ZT.141 | 5 | 11.77 | 86.7 | 1.02E+07 (R) |
| 444 | S1P_ZT_Ro  | 4 | 11.51 | 84.4 | 1.01E+07 (R) |
| 453 | S4P_ZT_Ro  | 2 | 11.44 | 75   | 8.31E+05 (R) |
| 454 | S4P_ZT_Ro  | 3 | 11.42 | 88   | 4.46E+06 (R) |
| 456 | S5P_ZT_Ro  | 2 | 11.41 | 65.9 | 1.57E+05 (R) |
| 482 | S3P_ZT_Ro  | 4 | 11.22 | 76.1 | 6.13E+06 (R) |
| 531 | S4P_ZT_Ro  | 4 | 10.84 | 73.4 | 2.83E+06 (R) |
| 535 | X3P_ZT.158 | 2 | 10.81 | 82   | 3.62E+05 (R) |
| 560 | S3P_ZT_Ro  | 5 | 10.65 | 80   | 5.03E+06 (R) |
| 561 | S5P_ZT_Ro  | 4 | 10.64 | 83   | 3.06E+06 (R) |
| 581 | L3P_ZT.149 | 5 | 10.44 | 66.5 | 1.49E+07 (R) |
| 595 | X3P_ZT.143 | 4 | 10.37 | 76.1 | 1.90E+07 (R) |
| 604 | S4P_ZT_Ro  | 2 | 10.3  | 70   | 8.31E+05 (R) |
| 608 | S1P_ZT_Ro  | 5 | 10.28 | 67.1 | 9.12E+06 (R) |
| 618 | S2P_ZT_Ro  | 4 | 10.22 | 70.8 | 1.59E+07 (R) |
| 620 | S4P_ZT_Ro  | 4 | 10.21 | 69.7 | 1.46E+07 (R) |
| 622 | S3P_ZT_Ro  | 4 | 10.21 | 67.8 | 1.22E+06 (R) |
| 632 | X3P_ZT.156 | 4 | 10.12 | 74.7 | 4.83E+06 (R) |
| 641 | X3P_ZT.145 | 3 | 10.04 | 77.2 | 8.99E+06 (R) |
| 656 | L3P_ZT.155 | 2 | 9.97  | 60.5 | 8.49E+05 (R) |
| 667 | S2P_ZT_Ro  | 3 | 9.93  | 80.4 | 7.60E+05 (R) |
| 673 | X3P_ZT.139 | 5 | 9.88  | 67.8 | 8.23E+06 (R) |
| 676 | X4P_ZT.157 | 4 | 9.86  | 75.3 | 4.39E+06 (R) |
| 690 | L3P_ZT.162 | 4 | 9.79  | 72.6 | 3.75E+06 (R) |
| 697 | L3P_ZT.155 | 5 | 9.76  | 63.2 | 1.49E+07 (R) |
| 703 | S5P_ZT_Ro  | 3 | 9.72  | 81.1 | 7.27E+06 (R) |
| 709 | X4P_ZT.143 | 3 | 9.69  | 69.2 | 5.85E+06 (R) |
| 725 | X3P_ZT.142 | 4 | 9.61  | 71.4 | 1.90E+07 (R) |
| 753 | X3P_ZT.141 | 4 | 9.47  | 72.2 | 1.43E+07 (R) |
| 754 | S5P_ZT_Ro  | 4 | 9.47  | 66   | 2.48E+07 (R) |
| 759 | L3P_ZT.153 | 4 | 9.44  | 65.3 | 2.95E+07 (R) |
| 761 | S4P_ZT_Ro  | 3 | 9.43  | 67   | 4.46E+06 (R) |
| 766 | S3P_ZT_Ro  | 3 | 9.42  | 72.4 | 4.29E+05 (R) |
| 769 | X4P_ZT.144 | 5 | 9.4   | 65.6 | 1.02E+07 (R) |
| 788 | S3P_ZT_Ro  | 3 | 9.27  | 81   | 1.54E+06 (R) |
| 791 | S2P_ZT_Ro  | 2 | 9.26  | 63.6 | 8.52E+05 (R) |

|                |   |       |      |              |
|----------------|---|-------|------|--------------|
| 801 X3P_ZT.15  | 3 | 9.2   | 64   | 1.64E+06 (R) |
| 812 S2P_ZT_Ro  | 3 | 9.14  | 76.4 | 4.77E+06 (R) |
| 819 S4P_ZT_Ro  | 2 | 9.1   | 67.8 | 8.31E+05 (R) |
| 836 X4P_ZT.14  | 2 | 9.03  | 69.2 | 7.11E+05 (R) |
| 848 X3P_ZT.14  | 5 | 8.99  | 72   | 1.15E+07 (R) |
| 864 S5P_ZT_Ro  | 2 | 8.93  | 64.6 | 1.57E+05 (R) |
| 867 X3P_ZT.15  | 5 | 8.92  | 72.5 | 1.47E+07 (R) |
| 876 X4P_ZT.14  | 5 | 8.88  | 70.5 | 8.58E+06 (R) |
| 892 S3P_ZT_Ro  | 3 | 8.81  | 71.9 | 1.54E+06 (R) |
| 918 L3P_ZT.15  | 3 | 8.71  | 70.5 | 6.56E+06 (R) |
| 924 S5P_ZT_Ro  | 3 | 8.65  | 77.1 | 7.27E+06 (R) |
| 979 X4P_ZT.15  | 3 | 8.44  | 70.3 | 1.24E+06 (R) |
| 990 X4P_ZT.14  | 3 | 8.41  | 71.3 | 5.85E+06 (R) |
| 1001 L3P_ZT.15 | 5 | 8.37  | 64.3 | 1.49E+07 (R) |
| 1033 S2P_ZT_Ro | 3 | 8.27  | 70.9 | 4.77E+06 (R) |
| 1040 X4P_ZT.15 | 5 | 8.25  | 89.7 | 2.63E+06 (R) |
| 1085 S2P_ZT_Ro | 2 | 8.07  | 64.8 | 1.94E+05 (R) |
| 1105 S1P_ZT_Ro | 2 | 8.02  | 69.7 | 6.11E+05 (R) |
| 1122 L3P_ZT.16 | 4 | 7.95  | 76.5 | 3.75E+06 (R) |
| 1143 X3P_ZT.14 | 2 | 7.86  | 63.5 | 7.68E+05 (R) |
| 1153 L3P_ZT.15 | 3 | 7.83  | 70.1 | 6.56E+06 (R) |
| 1179 S3P_ZT_Ro | 4 | 7.74  | 79.7 | 6.13E+06 (R) |
| 1193 S3P_ZT_Ro | 4 | 7.69  | 71.8 | 6.13E+06 (R) |
| 1208 X4P_ZT.14 | 5 | 7.65  | 67.5 | 1.02E+07 (R) |
| 1227 S5P_ZT_Ro | 2 | 7.56  | 62.7 | 1.57E+05 (R) |
| 1278 X3P_ZT.15 | 5 | 7.39  | 62.1 | 3.13E+06 (R) |
| 1315 S2P_ZT_Ro | 4 | 7.26  | 77   | 1.59E+07 (R) |
| 1328 X3P_ZT.14 | 2 | 7.21  | 65.3 | 5.27E+05 (R) |
| 1349 S2P_ZT_Ro | 2 | 7.15  | 64.4 | 8.52E+05 (R) |
| 1442 X3P_ZT.14 | 3 | 6.88  | 86.9 | 8.99E+06 (R) |
| 1447 X4P_ZT.14 | 4 | 6.87  | 63.4 | 2.08E+07 (R) |
| 1491 L3P_ZT.15 | 2 | 6.77  | 83.9 | 8.49E+05 (R) |
| 1497 S4P_ZT_Ro | 4 | 6.75  | 65.6 | 1.46E+07 (R) |
| 1566 S3P_ZT_Ro | 5 | 6.6   | 70.4 | 5.03E+06 (R) |
| 1611 S1P_ZT_Ro | 2 | 6.49  | 60.6 | 1.30E+05 (R) |
| 1661 S5P_ZT_Ro | 3 | 6.37  | 71.2 | 7.27E+06 (R) |
| 1755 S5P_ZT_Ro | 3 | 6.18  | 81.1 | 7.27E+06 (R) |
| 1782 X3P_ZT.13 | 2 | 6.1   | 70   | 5.27E+05 (R) |
| 1939 S5P_ZT_Ro | 3 | 5.73  | 78.7 | 8.71E+05 (R) |
| 2019 S3P_ZT_Ro | 2 | 5.59  | 66.9 | 3.76E+05 (R) |
| 2228 S4P_ZT_Ro | 4 | 5.22  | 80.3 | 1.21E+04 (R) |
| 1572 S1P_ZT_Ro | 3 | 6.58  | 62.1 | 5.59E+05 (R) |
| 2088 L1P_ZT.21 | 2 | 5.46  | 73.8 | 1.10E+06 (R) |
| 610 S3P_ZT_Ro  | 3 | 10.26 | 65.6 | 3.36E+04 (R) |
| 786 X3P_ZT.47  | 3 | 9.29  | 81.6 | 2.69E+05 (R) |
| 1531 L3P_ZT.56 | 3 | 6.69  | 76.9 | 7.96E+05 (R) |
| 104 S1P_ZT_Ro  | 4 | 15.44 | 84.2 | 3.26E+06 (R) |

|                 |   |       |      |              |
|-----------------|---|-------|------|--------------|
| 195 S4P_ZT_Ro   | 4 | 13.99 | 87.1 | 6.21E+06 (R) |
| 229 S3P_ZT_Ro   | 4 | 13.56 | 71.8 | 1.21E+06 (R) |
| 253 X3P_ZT.55!  | 4 | 13.25 | 80.9 | 1.42E+06 (R) |
| 426 S5P_ZT_Ro   | 4 | 11.63 | 66   | 4.17E+06 (R) |
| 514 S2P_ZT_Ro   | 4 | 10.94 | 73.3 | 2.74E+06 (R) |
| 781 X4P_ZT.55!  | 4 | 9.33  | 63.2 | 1.34E+06 (R) |
| 797 S4P_ZT_Ro   | 4 | 9.22  | 62.4 | 6.21E+06 (R) |
| 998 X4P_ZT.55!  | 3 | 8.37  | 60.4 | 1.23E+06 (R) |
| 1251 X2P_ZT.59! | 4 | 7.48  | 64   | 7.61E+04 (R) |
| 541 X4P_ZT.10!  | 4 | 10.78 | 76.8 | 5.10E+05 (R) |
| 985 S4P_ZT_Ro   | 4 | 8.43  | 69.9 | 3.35E+05 (R) |
| 1007 S1P_ZT_Ro  | 5 | 8.35  | 65.4 | 1.19E+06 (R) |
| 1020 S4P_ZT_Ro  | 5 | 8.31  | 67.5 | 3.81E+05 (R) |
| 1051 S2P_ZT_Ro  | 5 | 8.2   | 64.9 | 4.42E+05 (R) |
| 1082 X3P_ZT.10! | 3 | 8.07  | 78.4 | 1.39E+05 (R) |
| 1177 S4P_ZT_Ro  | 4 | 7.74  | 62.3 | 3.35E+05 (R) |
| 1284 L3P_ZT.11! | 3 | 7.38  | 91.3 | 8.55E+04 (R) |
| 1286 X4P_ZT.10! | 3 | 7.37  | 91.6 | 8.76E+04 (R) |
| 1318 S3P_ZT_Ro  | 5 | 7.25  | 71.1 | 9.65E+04 (R) |
| 1690 S1P_ZT_Ro  | 5 | 6.3   | 69.8 | 1.19E+06 (R) |
| 1697 S5P_ZT_Ro  | 5 | 6.29  | 78.9 | 4.29E+05 (R) |
| 1804 S1P_ZT_Ro  | 5 | 6.06  | 100  | 6.49E+04 (R) |
| 311 L3P_ZT.16!  | 4 | 12.59 | 76.3 | 1.01E+06 (R) |
| 390 S5P_ZT_Ro   | 4 | 11.84 | 80.5 | 1.85E+06 (R) |
| 438 S3P_ZT_Ro   | 3 | 11.54 | 72.7 | 2.63E+04 (R) |
| 504 S3P_ZT_Ro   | 4 | 11.02 | 82.8 | 3.36E+05 (R) |
| 516 S4P_ZT_Ro   | 4 | 10.93 | 66.9 | 1.47E+05 (R) |
| 557 X3P_ZT.15!  | 3 | 10.66 | 85.2 | 6.91E+05 (R) |
| 666 S4P_ZT_Ro   | 3 | 9.93  | 81.6 | 4.66E+05 (R) |
| 744 S2P_ZT_Ro   | 3 | 9.55  | 75   | 4.89E+05 (R) |
| 787 S4P_ZT_Ro   | 3 | 9.28  | 82.5 | 4.66E+05 (R) |
| 792 S1P_ZT_Ro   | 5 | 9.26  | 76.7 | 1.73E+06 (R) |
| 804 S2P_ZT_Ro   | 5 | 9.18  | 77.8 | 1.76E+06 (R) |
| 807 S1P_ZT_Ro   | 5 | 9.17  | 67.1 | 1.62E+05 (R) |
| 831 X4P_ZT.15!  | 4 | 9.06  | 69.4 | 2.34E+06 (R) |
| 859 X3P_ZT.15!  | 3 | 8.95  | 100  | 1.45E+05 (R) |
| 873 S2P_ZT_Ro   | 4 | 8.89  | 65.1 | 1.77E+06 (R) |
| 1030 X4P_ZT.15! | 3 | 8.27  | 78.2 | 7.13E+05 (R) |
| 1043 S1P_ZT_Ro  | 3 | 8.23  | 95.4 | 4.59E+05 (R) |
| 1301 S1P_ZT_Ro  | 3 | 7.31  | 76.2 | 4.59E+05 (R) |
| 1340 S4P_ZT_Ro  | 4 | 7.17  | 61.7 | 1.68E+06 (R) |
| 1359 L3P_ZT.16! | 4 | 7.12  | 100  | 1.01E+06 (R) |
| 1448 S1P_ZT_Ro  | 4 | 6.87  | 100  | 2.71E+05 (R) |
| 1479 S2P_ZT_Ro  | 3 | 6.78  | 85.2 | 4.89E+05 (R) |
| 1481 S1P_ZT_Ro  | 4 | 6.78  | 63.1 | 6.93E+05 (R) |
| 1612 L3P_ZT.16! | 3 | 6.49  | 93.1 | 2.09E+05 (R) |
| 1668 S5P_ZT_Ro  | 3 | 6.36  | 68.7 | 5.27E+05 (R) |

|                 |   |      |      |              |
|-----------------|---|------|------|--------------|
| 1744 L3P_ZT.156 | 3 | 6.21 | 63.2 | 6.17E+05 (R) |
| 1998 X4P_ZT.160 | 3 | 5.62 | 67.7 | 1.90E+05 (R) |
| 2103 L3P_ZT.156 | 4 | 5.42 | 100  | 4.30E+05 (R) |
| 1392 S4P_ZT_Ro  | 5 | 7    | 62.1 | 8.98E+05 (K) |
| 2136 S2P_ZT_Ro  | 5 | 5.36 | 73.8 | 1.15E+05 (K) |
| 1199 L1P_ZT.318 | 3 | 7.67 | 67.5 | 5.64E+05 (C) |
| 1650 L1P_ZT.156 | 3 | 6.41 | 71.4 | 2.12E+05 (C) |
| 2169 S4P_ZT_Ro  | 2 | 5.3  | 67.4 | 1.29E+05 (R) |
| 1838 X1P_ZT.209 | 2 | 5.95 | 82.9 | 7.73E+06 (K) |
| 1889 S5P_ZT_Ro  | 2 | 5.83 | 66   | 4.84E+06 (K) |
| 2028 X4P_ZT.209 | 2 | 5.57 | 64.7 | 2.67E+06 (K) |
| 2113 L4P_ZT.130 | 2 | 5.41 | 71   | 6.97E+05 (K) |
| 1059 L2P_ZT.200 | 2 | 8.15 | 78   | 6.62E+07 (K) |
| 1830 X1P_ZT.211 | 2 | 5.98 | 60.3 | 7.00E+07 (K) |
| 1167 S5P_ZT_Ro  | 3 | 7.77 | 66.7 | 1.02E+05 (L) |
| 1306 S4P_ZT_Ro  | 3 | 7.3  | 65.7 | 3.96E+05 (L) |
| 1322 S4P_ZT_Ro  | 3 | 7.23 | 63   | 3.96E+05 (L) |
| 1347 S4P_ZT_Ro  | 3 | 7.15 | 62.4 | 3.96E+05 (L) |
| 1571 S5P_ZT_Ro  | 3 | 6.58 | 65.7 | 1.02E+05 (L) |
| 2097 L1P_ZT.397 | 4 | 5.45 | 68.2 | 3.50E+04 (K) |
| 837 L4P_ZT.780  | 2 | 9.03 | 66.4 | 1.70E+06 (P) |
| 1436 X4P_ZT.482 | 3 | 6.89 | 70.6 | 9.67E+05 (Y) |
| 2131 L1P_ZT.173 | 2 | 5.37 | 71   | 1.08E+05 (K) |
| 1695 X4P_ZT.482 | 4 | 6.29 | 86.6 | 2.19E+04 (R) |
| 705 S3P_ZT_Ro   | 7 | 9.71 | 64.9 | 2.94E+05 (K) |
| 1022 S3P_ZT_Ro  | 7 | 8.31 | 60.4 | 7.16E+04 (K) |
| 1206 X5P_ZT.558 | 7 | 7.65 | 72.5 | 1.59E+05 (K) |
| 1408 X2P_ZT.546 | 7 | 6.97 | 100  | 7.73E+04 (K) |
| 1543 X3P_ZT.549 | 7 | 6.65 | 62.3 | 2.16E+06 (K) |
| 1622 S4P_ZT_Ro  | 7 | 6.47 | 100  | 1.03E+05 (K) |
| 1089 L1P_ZT.321 | 3 | 8.06 | 71   | 1.10E+06 (C) |
| 1605 L3P_ZT.336 | 3 | 6.51 | 68.7 | 2.35E+06 (C) |
| 2275 L4P_ZT.308 | 4 | 5.12 | 71.6 | 3.49E+04 (K) |
| 2090 L2P_ZT.213 | 6 | 5.46 | 71.3 | 4.80E+04 (R) |
| 1859 X1P_ZT.353 | 4 | 5.91 | 65.3 | 1.03E+05 (R) |
| 1658 L5P_ZT.256 | 2 | 6.38 | 68   | 8.38E+04 (K) |
| 1014 S1P_ZT_Ro  | 2 | 8.33 | 70.9 | 5.34E+06 (G) |
| 1403 S4P_ZT_Ro  | 5 | 6.98 | 70.4 | 7.30E+05 (T) |
| 1587 S3P_ZT_Ro  | 5 | 6.55 | 69.5 | 5.40E+05 (T) |
| 1795 X5P_ZT.521 | 5 | 6.08 | 68.7 | 1.06E+06 (T) |
| 1827 S4P_ZT_Ro  | 3 | 5.99 | 63   | 1.13E+06 (R) |
| 1379 S5P_ZT_Ro  | 3 | 7.04 | 61.9 | 1.34E+06 (V) |
| 2172 L2P_ZT.116 | 2 | 5.3  | 61.8 | 5.90E+05 (K) |
| 1987 S3P_ZT_Ro  | 3 | 5.65 | 61.1 | 5.72E+05 (K) |
| 1769 S2P_ZT_Ro  | 3 | 6.14 | 62   | 2.44E+04 (K) |
| 2045 L4P_ZT.246 | 3 | 5.54 | 92   | 1.19E+04 (K) |
| 2117 X2P_ZT.279 | 4 | 5.39 | 67.1 | 3.19E+05 (K) |

|                 |   |       |      |              |
|-----------------|---|-------|------|--------------|
| 1929 X2P_ZT.496 | 4 | 5.75  | 64.7 | 1.27E+04 (K) |
| 1463 S4P_ZT_Ro  | 6 | 6.83  | 61.5 | 8.78E+05 (K) |
| 1858 X2P_ZT.288 | 4 | 5.91  | 67.5 | 2.16E+06 (R) |
| 1982 X2P_ZT.289 | 5 | 5.65  | 71.5 | 4.27E+06 (R) |
| 2324 X2P_ZT.290 | 4 | 5.01  | 65.6 | 2.16E+06 (R) |
| 1710 S3P_ZT_Ro  | 2 | 6.27  | 62.7 | 1.66E+06 (K) |
| 1802 X1P_ZT.318 | 2 | 6.06  | 100  | 8.96E+05 (K) |
| 2009 S1P_ZT_Ro  | 2 | 5.61  | 71.8 | 6.34E+05 (K) |
| 2059 S1P_ZT_Ro  | 2 | 5.51  | 83.3 | 1.26E+06 (K) |
| 2127 S3P_ZT_Ro  | 2 | 5.37  | 61.8 | 7.48E+05 (K) |
| 2292 S3P_ZT_Ro  | 2 | 5.09  | 62.2 | 1.58E+06 (K) |
| 1145 S1P_ZT_Ro  | 2 | 7.86  | 68.4 | 6.98E+05 (K) |
| 1420 S5P_ZT_Ro  | 4 | 6.94  | 72.9 | 2.18E+06 (K) |
| 1417 L3P_ZT.270 | 3 | 6.95  | 65.1 | 2.49E+04 (K) |
| 1547 L3P_ZT.488 | 5 | 6.65  | 66.2 | 2.14E+06 (K) |
| 2225 X4P_ZT.489 | 6 | 5.22  | 61.5 | 7.27E+05 (K) |
| 2027 L3P_ZT.501 | 5 | 5.58  | 70.8 | 2.89E+04 (K) |
| 2297 X5P_ZT.290 | 5 | 5.08  | 80.1 | 9.63E+05 (K) |
| 1698 S5P_ZT_Ro  | 2 | 6.29  | 63.6 | 4.36E+05 (K) |
| 1902 L3P_ZT.491 | 2 | 5.81  | 66.3 | 3.43E+05 (K) |
| 1679 X2P_ZT.509 | 7 | 6.33  | 66.8 | 1.47E+05 (K) |
| 1881 X4P_ZT.497 | 7 | 5.86  | 61.8 | 1.15E+05 (K) |
| 714 L5P_ZT.459  | 2 | 9.68  | 68.1 | 5.70E+05 (E) |
| 774 X3P_ZT.274  | 2 | 9.37  | 60.5 | 9.88E+05 (G) |
| 899 S1P_ZT_Ro   | 2 | 8.78  | 63.7 | 5.76E+05 (G) |
| 1063 L3P_ZT.250 | 2 | 8.14  | 63.3 | 5.21E+05 (G) |
| 1188 L3P_ZT.275 | 2 | 7.72  | 100  | 1.19E+06 (G) |
| 1867 S2P_ZT_Ro  | 3 | 5.9   | 69.5 | 1.23E+06 (K) |
| 2290 L4P_ZT.247 | 3 | 5.1   | 61.1 | 1.39E+06 (K) |
| 2313 S5P_ZT_Ro  | 3 | 5.04  | 76.5 | 3.35E+06 (K) |
| 1226 X2P_ZT.359 | 3 | 7.56  | 87.2 | 7.66E+04 (E) |
| 1912 L4P_ZT.412 | 5 | 5.79  | 60.9 | 9.41E+04 (K) |
| 2286 S5P_ZT_Ro  | 4 | 5.1   | 66.3 | 1.26E+06 (K) |
| 1865 X1P_ZT.240 | 2 | 5.9   | 85.5 | 5.27E+05 (R) |
| 2327 L2P_ZT.238 | 2 | 5.01  | 77.1 | 5.11E+05 (R) |
| 2190 S5P_ZT_Ro  | 2 | 5.26  | 66.1 | 2.27E+04 (R) |
| 2086 S5P_ZT_Ro  | 3 | 5.46  | 78.2 | 2.59E+05 (K) |
| 2230 S3P_ZT_Ro  | 5 | 5.22  | 100  | 2.22E+05 (K) |
| 1910 L3P_ZT.172 | 2 | 5.79  | 65.5 | 8.45E+05 (K) |
| 977 S1P_ZT_Ro   | 2 | 8.45  | 70.8 | 2.60E+06 (E) |
| 1884 L1P_ZT.490 | 4 | 5.85  | 60.7 | 3.84E+04 (C) |
| 616 S4P_ZT_Ro   | 2 | 10.22 | 86.8 | 3.82E+07 (K) |
| 729 S2P_ZT_Ro   | 2 | 9.59  | 85.4 | 3.94E+07 (K) |
| 853 S3P_ZT_Ro   | 2 | 8.98  | 82.4 | 2.44E+07 (K) |
| 891 S1P_ZT_Ro   | 2 | 8.82  | 83.5 | 2.04E+06 (K) |
| 920 S5P_ZT_Ro   | 2 | 8.7   | 93.3 | 2.83E+07 (K) |
| 1060 X4P_ZT.484 | 2 | 8.14  | 79.5 | 2.15E+06 (K) |

|                 |   |       |      |              |
|-----------------|---|-------|------|--------------|
| 1127 X3P_ZT.479 | 2 | 7.92  | 87.9 | 8.90E+05 (K) |
| 1160 S2P_ZT_Ro  | 2 | 7.8   | 71   | 3.94E+07 (K) |
| 1854 S1P_ZT_Ro  | 2 | 5.92  | 100  | 1.74E+06 (K) |
| 2252 L3P_ZT.567 | 2 | 5.18  | 76.7 | 8.01E+06 (K) |
| 1702 L2P_ZT.340 | 2 | 6.29  | 64.4 | 1.74E+04 (K) |
| 1431 L4P_ZT.297 | 3 | 6.92  | 100  | 4.45E+04 (K) |
| 2212 L4P_ZT.351 | 2 | 5.24  | 87.4 | 4.37E+04 (K) |
| 2299 L3P_ZT.515 | 2 | 5.08  | 65.9 | 3.02E+07 (K) |
| 1574 L3P_ZT.403 | 3 | 6.58  | 87.7 | 1.68E+06 (K) |
| 1926 L4P_ZT.438 | 3 | 5.76  | 72.8 | 8.32E+06 (K) |
| 2115 S2P_ZT_Ro  | 3 | 5.4   | 61.7 | 6.76E+06 (K) |
| 2200 S3P_ZT_Ro  | 3 | 5.25  | 75.1 | 2.49E+06 (K) |
| 2204 L3P_ZT.453 | 3 | 5.25  | 73.3 | 3.34E+06 (K) |
| 1727 S2P_ZT_Ro  | 2 | 6.23  | 64.5 | 1.81E+06 (K) |
| 631 S4P_ZT_Ro   | 2 | 10.14 | 81   | 7.63E+07 (K) |
| 671 S2P_ZT_Ro   | 2 | 9.89  | 83.6 | 7.60E+07 (K) |
| 741 S5P_ZT_Ro   | 2 | 9.56  | 100  | 1.23E+08 (K) |
| 832 S1P_ZT_Ro   | 2 | 9.06  | 78.9 | 1.27E+08 (K) |
| 1006 S3P_ZT_Ro  | 2 | 8.36  | 78.2 | 4.46E+07 (K) |
| 1427 X4P_ZT.461 | 2 | 6.92  | 100  | 6.36E+07 (K) |
| 2076 X3P_ZT.464 | 2 | 5.47  | 87.6 | 1.40E+08 (K) |
| 2304 S5P_ZT_Ro  | 2 | 5.06  | 80.6 | 1.23E+08 (K) |
| 1131 L5P_ZT.359 | 3 | 7.91  | 70   | 1.74E+05 (K) |
| 1365 S4P_ZT_Ro  | 2 | 7.09  | 63.1 | 2.36E+06 (K) |
| 1997 L4P_ZT.401 | 2 | 5.63  | 78.1 | 7.86E+05 (K) |
| 1869 L3P_ZT.185 | 2 | 5.9   | 88.2 | 8.62E+04 (K) |
| 2132 L5P_ZT.259 | 5 | 5.37  | 100  | 1.08E+05 (K) |
| 2261 L4P_ZT.489 | 4 | 5.16  | 63.5 | 5.30E+04 (K) |
| 1579 X4P_ZT.281 | 3 | 6.57  | 63.2 | 2.13E+07 (K) |
| 1970 S2P_ZT_Ro  | 2 | 5.67  | 100  | 2.13E+07 (K) |
| 2256 S5P_ZT_Ro  | 4 | 5.17  | 100  | 1.00E+05 (K) |
| 2091 L4P_ZT.363 | 4 | 5.46  | 63.8 | 4.85E+05 (K) |
| 1236 L1P_ZT.360 | 3 | 7.54  | 79.8 | 1.59E+05 (T) |
| 1026 X3P_ZT.158 | 6 | 8.28  | 63.1 | 8.51E+04 (K) |
| 649 S5P_ZT_Ro   | 2 | 10    | 67.7 | 8.40E+05 (R) |
| 737 X4P_ZT.776  | 2 | 9.56  | 76.9 | 1.49E+06 (R) |
| 883 S1P_ZT_Ro   | 2 | 8.86  | 78.2 | 2.63E+06 (R) |
| 884 L1P_ZT.842  | 2 | 8.86  | 63.9 | 1.57E+06 (R) |
| 1140 S3P_ZT_Ro  | 2 | 7.87  | 66   | 2.39E+06 (R) |
| 1309 S2P_ZT_Ro  | 2 | 7.28  | 64.9 | 8.13E+05 (R) |
| 1411 L3P_ZT.844 | 2 | 6.97  | 65.7 | 9.60E+05 (R) |
| 1628 S4P_ZT_Ro  | 2 | 6.46  | 60.1 | 1.08E+06 (R) |
| 1864 L5P_ZT.811 | 2 | 5.91  | 62.6 | 9.46E+05 (R) |
| 2030 L2P_ZT.796 | 2 | 5.57  | 63.7 | 1.71E+06 (R) |
| 2038 L4P_ZT.904 | 2 | 5.55  | 69.9 | 6.56E+05 (R) |
| 1842 S2P_ZT_Ro  | 5 | 5.94  | 66.4 | 6.57E+04 (R) |
| 1880 L2P_ZT.266 | 4 | 5.87  | 67.6 | 1.87E+06 (R) |



|                 |   |      |      |              |
|-----------------|---|------|------|--------------|
| 1992 S3P_ZT_Ro  | 4 | 5.64 | 61.5 | 1.40E+06 (R) |
| 2119 L1P_ZT.266 | 4 | 5.39 | 62.6 | 5.67E+06 (R) |
| 1136 L1P_ZT.222 | 3 | 7.88 | 61.9 | 3.26E+05 (R) |
| 1380 X3P_ZT.658 | 3 | 7.03 | 86.3 | 1.24E+05 (R) |
| 1921 L5P_ZT.719 | 3 | 5.77 | 85.9 | 1.46E+05 (R) |
| 2110 X1P_ZT.409 | 2 | 5.41 | 68.9 | 7.65E+05 (R) |
| 2125 X5P_ZT.169 | 6 | 5.37 | 79   | 4.47E+05 (R) |
| 1745 S4P_ZT_Ro  | 3 | 6.2  | 100  | 5.93E+05 (P) |
| 1685 S4P_ZT_Ro  | 3 | 6.31 | 83.8 | 1.03E+06 (R) |
| 1701 L2P_ZT.252 | 2 | 6.29 | 61.3 | 4.59E+05 (R) |
| 1836 X1P_ZT.259 | 2 | 5.96 | 75.9 | 4.57E+05 (R) |
| 2092 X5P_ZT.128 | 2 | 5.45 | 83.7 | 1.65E+06 (R) |
| 1959 L3P_ZT.410 | 3 | 5.71 | 79.4 | 7.93E+04 (K) |
| 2157 S5P_ZT_Ro  | 5 | 5.32 | 83.4 | 1.29E+05 (R) |
| 2320 L2P_ZT.348 | 4 | 5.02 | 89.6 | 3.83E+07 (R) |
| 1330 S2P_ZT_Ro  | 5 | 7.21 | 77   | 1.53E+06 (R) |
| 2083 L3P_ZT.326 | 2 | 5.47 | 100  | 1.51E+05 (R) |
| 1967 L2P_ZT.367 | 3 | 5.68 | 67.1 | 5.55E+04 (R) |
| 1861 L1P_ZT.525 | 5 | 5.91 | 72.2 | 3.50E+04 (R) |
| 1258 X1P_ZT.389 | 2 | 7.45 | 76.8 | 3.65E+06 (L) |
| 1985 S5P_ZT_Ro  | 6 | 5.65 | 78.8 | 5.04E+05 (R) |
| 1426 X4P_ZT.439 | 4 | 6.92 | 100  | 2.37E+06 (K) |
| 1117 L3P_ZT.504 | 5 | 7.97 | 80.7 | 4.44E+05 (N) |
| 1194 X1P_ZT.989 | 2 | 7.68 | 65.4 | 9.52E+07 (K) |
| 1395 L1P_ZT.913 | 2 | 7    | 66.1 | 7.15E+07 (K) |
| 1558 L3P_ZT.935 | 2 | 6.63 | 65.3 | 1.37E+08 (K) |
| 1597 S2P_ZT_Ro  | 2 | 6.52 | 63.8 | 1.76E+08 (K) |
| 1683 L4P_ZT.100 | 2 | 6.32 | 67   | 4.60E+07 (K) |
| 1728 S1P_ZT_Ro  | 2 | 6.23 | 87.4 | 1.06E+08 (K) |
| 1849 X5P_ZT.890 | 2 | 5.92 | 62   | 1.97E+08 (K) |
| 1905 L4P_ZT.105 | 2 | 5.8  | 67.8 | 4.60E+07 (K) |
| 2295 L4P_ZT.101 | 2 | 5.09 | 61.2 | 4.60E+07 (K) |
| 1134 S3P_ZT_Ro  | 5 | 7.89 | 69.2 | 1.95E+05 (N) |
| 2026 L2P_ZT.378 | 3 | 5.58 | 89   | 1.01E+06 (L) |
| 2166 S2P_ZT_Ro  | 4 | 5.31 | 88.2 | 4.20E+04 (K) |
| 1524 S4P_ZT_Ro  | 2 | 6.7  | 100  | 3.98E+06 (K) |
| 2008 X4P_ZT.553 | 2 | 5.61 | 76.1 | 1.16E+06 (K) |
| 1501 L3P_ZT.166 | 3 | 6.75 | 100  | 4.05E+06 (K) |
| 1822 S4P_ZT_Ro  | 3 | 6    | 100  | 1.73E+06 (K) |
| 1909 L2P_ZT.153 | 2 | 5.79 | 86.5 | 9.03E+05 (K) |
| 2202 L1P_ZT.156 | 2 | 5.25 | 100  | 1.59E+06 (K) |
| 1166 X5P_ZT.504 | 7 | 7.77 | 61.9 | 5.84E+06 (K) |
| 1390 X2P_ZT.516 | 5 | 7    | 78.2 | 5.27E+04 (K) |
| 2326 L1P_ZT.377 | 2 | 5.01 | 70.4 | 1.67E+05 (K) |
| 944 X3P_ZT.417  | 2 | 8.58 | 67.9 | 1.69E+05 (K) |
| 1108 L4P_ZT.402 | 2 | 8.01 | 64.5 | 1.08E+06 (K) |
| 1110 X1P_ZT.394 | 2 | 7.99 | 62.1 | 1.72E+06 (K) |

|                 |   |      |      |              |
|-----------------|---|------|------|--------------|
| 1128 S1P_ZT_Ro  | 2 | 7.92 | 63.9 | 4.76E+06 (K) |
| 1164 L5P_ZT.42C | 2 | 7.79 | 68.5 | 9.33E+05 (K) |
| 1292 L2P_ZT.402 | 2 | 7.35 | 64.1 | 3.08E+06 (K) |
| 1326 S2P_ZT_Ro  | 2 | 7.22 | 73.6 | 1.47E+06 (K) |
| 1375 L2P_ZT.403 | 2 | 7.05 | 70.2 | 3.08E+06 (K) |
| 1383 S4P_ZT_Ro  | 2 | 7.02 | 70.3 | 1.43E+06 (K) |
| 1439 L2P_ZT.393 | 2 | 6.89 | 73   | 4.85E+06 (K) |
| 1477 X2P_ZT.423 | 2 | 6.79 | 70.9 | 3.87E+05 (K) |
| 1731 L5P_ZT.43C | 2 | 6.23 | 71.2 | 1.08E+07 (K) |
| 1750 X2P_ZT.434 | 2 | 6.19 | 71.2 | 2.84E+06 (K) |
| 1786 L3P_ZT.415 | 2 | 6.1  | 60.3 | 3.61E+04 (K) |
| 1968 X4P_ZT.418 | 2 | 5.67 | 70.8 | 3.25E+06 (K) |
| 2188 X3P_ZT.477 | 2 | 5.26 | 73.3 | 1.26E+06 (K) |
| 2193 L3P_ZT.359 | 4 | 5.26 | 69.2 | 2.91E+05 (K) |
| 2281 L5P_ZT.367 | 4 | 5.11 | 61.7 | 1.03E+05 (K) |
| 1129 L5P_ZT.319 | 3 | 7.92 | 77.6 | 4.64E+05 (K) |
| 719 S5P_ZT_Ro   | 2 | 9.65 | 70.7 | 2.15E+06 (N) |
| 882 S3P_ZT_Ro   | 2 | 8.86 | 86.4 | 1.47E+06 (N) |
| 982 S4P_ZT_Ro   | 2 | 8.44 | 66.8 | 2.35E+06 (N) |
| 987 X3P_ZT.557  | 2 | 8.42 | 100  | 5.54E+05 (N) |
| 1325 X2P_ZT.526 | 4 | 7.22 | 100  | 1.29E+05 (N) |
| 1866 S3P_ZT_Ro  | 5 | 5.9  | 90.3 | 7.26E+05 (R) |
| 1991 X1P_ZT.47C | 5 | 5.64 | 87.9 | 5.51E+05 (R) |
| 2223 X5P_ZT.523 | 5 | 5.22 | 100  | 7.04E+05 (R) |
| 1192 X2P_ZT.503 | 5 | 7.69 | 65.3 | 5.56E+04 (A) |
| 1879 S2P_ZT_Ro  | 5 | 5.87 | 60.4 | 2.30E+05 (A) |
| 2239 X1P_ZT.197 | 3 | 5.21 | 79.1 | 2.66E+04 (K) |

**Tandem mass spectrometry for serum amyloid A peptides detected in plasma**

| sequence                                    | next_aa | sequenceV | modificatic | parent_m_ | matched_p |
|---------------------------------------------|---------|-----------|-------------|-----------|-----------|
| AADILLGVItK                                 | (S)     |           | t:Phosphor  | 597.3223  | 1113.688  |
| AAPDGSGTLVRDFVCDVCE DLCQTDDLVLHERK          | (S)     |           | C:Carbamic  | 667.9969  | 4002.899  |
| AAVAAGTEGAPGFWDITK                          | (P)     |           |             | 931.9783  | 1862.928  |
| ADLVREGYLTERTCVAAARSLTPNFQTSFEHLQCVLSEAD    | (L)     |           | C:Carbamic  | 1202.851  | 4808.352  |
| ADQAANEWGR                                  | (S)     |           |             | 559.2582  | 1117.502  |
| ADQAAnEWGR                                  | (S)     |           | n:Deamida   | 559.7488  | 1117.502  |
| ADQAANEWGR                                  | (S)     |           |             | 559.2585  | 1117.502  |
| ADQAANEWGR                                  | (S)     |           |             | 559.2581  | 1117.502  |
| ADQAANEWGR                                  | (S)     |           |             | 559.2508  | 1117.502  |
| ADQAANEWGR                                  | (S)     |           |             | 559.2595  | 1117.502  |
| ADQAANEWGR                                  | (S)     |           |             | 559.2592  | 1117.502  |
| ADQAANEWGR                                  | (S)     |           |             | 559.2582  | 1117.502  |
| ADQAANEWGR                                  | (S)     |           |             | 559.2551  | 1117.502  |
| ADQAANEWGR                                  | (S)     |           |             | 559.2563  | 1117.502  |
| ADQAAnEWGR                                  | (S)     |           | n:Deamida   | 559.746   | 1117.502  |
| ADQAAnEWGR                                  | (S)     |           | n:Deamida   | 559.7488  | 1117.502  |
| ADQAANEWGR                                  | (S)     |           |             | 559.2586  | 1117.502  |
| ADQAAnEWGR                                  | (S)     |           | n:Deamida   | 559.7496  | 1117.502  |
| ADQAAnEWGR                                  | (S)     |           | n:Deamida   | 559.7505  | 1117.502  |
| ADQAANEWGR                                  | (S)     |           |             | 559.2552  | 1117.502  |
| ADQAAnEWGR                                  | (S)     |           | n:Deamida   | 559.7465  | 1117.502  |
| ADQAAnEWGR                                  | (S)     |           | n:Deamida   | 559.7487  | 1117.502  |
| ADQAANEWGR                                  | (S)     |           |             | 559.2571  | 1117.502  |
| ADQAANEWGR                                  | (S)     |           |             | 559.259   | 1117.502  |
| ADQAAnEWGR                                  | (S)     |           | n:Deamida   | 559.7499  | 1117.502  |
| ADQAAnEWGR                                  | (S)     |           | n:Deamida   | 559.7498  | 1117.502  |
| ADQAAnEWGR                                  | (S)     |           | n:Deamida   | 559.7501  | 1117.502  |
| ADQAANEWGR                                  | (S)     |           |             | 559.2615  | 1117.502  |
| ADQAANEWGR                                  | (S)     |           |             | 559.2582  | 1117.502  |
| ADQAANEWGR                                  | (S)     |           |             | 559.2573  | 1117.502  |
| ADQAAnEWGR                                  | (S)     |           | n:Deamida   | 559.7488  | 1117.502  |
| ADQAANEWGR                                  | (S)     |           |             | 559.2568  | 1117.502  |
| ADQAANEWGR                                  | (S)     |           |             | 559.2571  | 1117.502  |
| ADQAANEWGRSGKDPNHFRP                        | (A)     |           |             | 751.6925  | 2253.054  |
| ADQAANEWGRSGKDPNHFRP                        | (A)     |           |             | 751.6917  | 2253.054  |
| ADQAANEWGRSGKDPNHFRP                        | (A)     |           |             | 751.6953  | 2253.054  |
| ADQEANQWGRSGNDPNHFRPKGLPD                   | (K)     |           |             | 702.3219  | 2806.304  |
| ALVGS LTHILQHLEDCQKEPLEK PmRPsNEG TDEPR     | (A)     |           | C:Carbamic  | 1056.003  | 4125.049  |
| ANHQN sDQYFYARGnFEAQQRGSGGVWAAK             | (I)     | ANHQN sDC | s:Phosphor  | 1146.862  | 3357.553  |
| ANHQN sDQYFYARGnFEAQQRGSGGVWAAK             | (I)     | ANHQN sDC | s:Phosphor  | 1146.861  | 3357.553  |
| ANHQN sDQYFYARGnFEAQQRGSGGVWAAK             | (I)     | ANHQN sDC | s:Phosphor  | 1146.861  | 3357.553  |
| ANWIGADKYFHAR                               | (G)     |           |             | 774.8846  | 1548.771  |
| ANWKNSDKYFHARGNYDAASRGAGGR                  | (V)     |           |             | 957.1371  | 2869.363  |
| ANWKNSDKYFHARGNYDAASRGAGGR                  | (V)     |           |             | 957.1441  | 2869.363  |
| ATDILVGVISRSRCPRLTEICVGILGNIACFPDTCATLSQNEI | (E)     |           | C:Carbamic  | 827.7603  | 4961.474  |

|                             |     |          |           |          |        |
|-----------------------------|-----|----------|-----------|----------|--------|
| ATVIFSLKNEV                 | (G) |          | 610.8601  | 1220.688 |        |
| ATVIFSLKNEV                 | (G) |          | 610.8589  | 1220.688 |        |
| AVGEDDDDLAIGETIYSkHWIFSTLTR | (L) | k:Acetyl | 1032.187  | 3052.49  |        |
| AYHDMR                      | (E) |          | 396.6759  | 792.346  |        |
| AYHDMR                      | (E) |          | 264.7873  | 792.346  |        |
| AYHDMR                      | (E) |          | 396.6769  | 792.346  |        |
| AYHDMR                      | (E) |          | 264.7874  | 792.346  |        |
| AYHDMR                      | (E) |          | 396.6767  | 792.346  |        |
| AYHDMR                      | (E) |          | 264.7868  | 792.346  |        |
| AYHDMR                      | (E) |          | 264.787   | 792.346  |        |
| AYHDMR                      | (E) |          | 396.6775  | 792.346  |        |
| AYHDMR                      | (E) |          | 396.6766  | 792.346  |        |
| AYHDMR                      | (E) |          | 264.7864  | 792.346  |        |
| AYHDMR                      | (E) |          | 264.7872  | 792.346  |        |
| AYHDMR                      | (E) |          | 264.7885  | 792.346  |        |
| AYHDMR                      | (E) |          | 396.6765  | 792.346  |        |
| AYHDMR                      | (E) |          | 264.7899  | 792.346  |        |
| AYHDMR                      | (E) |          | 396.6785  | 792.346  |        |
| AYNDMR                      | (E) |          | 385.1705  | 769.33   |        |
| AYNDMR                      | (E) |          | 385.171   | 769.33   |        |
| AYNDMR                      | (E) |          | 385.1704  | 769.33   |        |
| AYNDMR                      | (E) |          | 385.1704  | 769.33   |        |
| AYNDMR                      | (E) |          | 385.1698  | 769.33   |        |
| AYNDMR                      | (E) |          | 385.1692  | 769.33   |        |
| AYNDMR                      | (E) |          | 385.1718  | 769.33   |        |
| AYNDMR                      | (E) |          | 385.1706  | 769.33   |        |
| AYNDMR                      | (E) |          | 385.1685  | 769.33   |        |
| AYnDMR                      | (E) | AYnDMR   | n:Deamida | 385.6588 | 769.33 |
| AYnDMR                      | (E) |          | n:Deamida | 385.6613 | 769.33 |
| AYnDMR                      | (E) |          | n:Deamida | 385.6635 | 769.33 |
| AYnDMR                      | (E) |          | n:Deamida | 385.6613 | 769.33 |
| AYnDMR                      | (E) | AYnDMR   | n:Deamida | 385.6628 | 769.33 |
| AYnDMR                      | (E) |          | n:Deamida | 385.6601 | 769.33 |
| AYnDMR                      | (E) |          | n:Deamida | 385.6616 | 769.33 |
| AYnDMR                      | (E) |          | n:Deamida | 385.6594 | 769.33 |
| AYnDMR                      | (E) |          | n:Deamida | 385.6634 | 769.33 |
| AYnDMR                      | (E) |          | n:Deamida | 385.661  | 769.33 |
| AYnDMR                      | (E) |          | n:Deamida | 385.6616 | 769.33 |
| AYnDMR                      | (E) |          | n:Deamida | 385.6637 | 769.33 |
| AYnDMR                      | (E) | AYnDMR   | n:Deamida | 385.6613 | 769.33 |
| AYnDMR                      | (E) |          | n:Deamida | 385.6612 | 769.33 |
| AYnDMR                      | (E) |          | n:Deamida | 385.6629 | 769.33 |
| AYnDMR                      | (E) |          | n:Deamida | 385.6622 | 769.33 |
| AYnDMR                      | (E) |          | n:Deamida | 385.6606 | 769.33 |
| AYnDMR                      | (E) |          | n:Deamida | 385.6634 | 769.33 |
| AYnDMR                      | (E) |          | n:Deamida | 385.6628 | 769.33 |
| AYNDMR                      | (E) |          | 385.1747  | 769.33   |        |

|                                |     |                      |          |          |
|--------------------------------|-----|----------------------|----------|----------|
| AYQDmkKSNWINGDK                | (Y) | AYQDmkKS m:Oxidized  | 619.6231 | 1797.859 |
| AYQDMKKS NWINGDK               | (Y) | k:Acetyl             | 920.4453 | 1797.859 |
| AYS DMKEANYINADkYFHAR          | (G) | k:Carbamyl           | 624.0244 | 2407.114 |
| AYWNVLTSSHQ NSKRYFYAQGN YDAAER | (G) |                      | 835.659  | 3339.557 |
| AYWNVLTSSHQ NSKRYFYAQGN YDAAER | (G) |                      | 668.7291 | 3339.557 |
| CLESTELPLCSALRRGAESPLR         | (A) | C:Carbamic           | 839.0896 | 2515.276 |
| CSCAFENLLPFYsPVVEDFLK          | (I) | C:Carbamic           | 886.7296 | 2535.193 |
| CSCAFknLLPFYsPVIEDFLK          | (I) | C:Carbamic           | 864.7417 | 2548.262 |
| CSCAFkNLLPLYCsVVKDFLK          | (V) | C:Carbamic           | 909.4358 | 2562.292 |
| CSCAFK NLLPLYCsVVKDFLK         | (V) | C:Carbamic           | 909.4358 | 2562.292 |
| CSCAFkNLLPLYCsVVKDFLK          | (V) | C:Carbamic           | 909.445  | 2562.292 |
| CSCAFQnLLPFyNPVVEDFIK          | (I) | C:Carbamic           | 881.408  | 2561.22  |
| CSCAFQnLLPFyNPVVEDFIK          | (I) | CSCAFQnLL C:Carbamic | 881.4121 | 2561.22  |
| CSCAFQnLLPFyNPVVEDFIK          | (I) | C:Carbamic           | 881.4071 | 2561.22  |
| CSCAFQnLLPFyNPVVEDFIK          | (I) | CSCAFQnLL C:Carbamic | 881.408  | 2561.22  |
| CSCAFQnLLPFyNPVVEDFIK          | (I) | C:Carbamic           | 881.408  | 2561.22  |
| CSCAFQnLLPFynPVVEDFIK          | (I) | C:Carbamic           | 881.4122 | 2561.22  |
| CSCAFQnLLPFyNPVVEDFIK          | (I) | C:Carbamic           | 881.077  | 2561.22  |
| CSCAFQnLLPFyNPVVEDFIK          | (I) | CSCAFQnLL C:Carbamic | 881.4054 | 2561.22  |
| CsCAFQnLLPFynPVVEDFIK          | (I) | C:Carbamic           | 661.5513 | 2561.22  |
| CSCAFQnLLPFYSPmVEDFLk          | (I) | C:Carbamic           | 875.7266 | 2566.182 |
| CSCAFQnLLPFYsPMVEDFLK          | (I) | C:Carbamic           | 882.7264 | 2566.182 |
| CSCAFQnLLPFYsPVVEDFLR          | (V) | C:Carbamic           | 881.4034 | 2562.216 |
| CSCAFQnLLPFYsPVVEDFLR          | (V) | C:Carbamic           | 881.4098 | 2562.216 |
| CSCAFQnLLPFYsPVVEDFLR          | (V) | C:Carbamic           | 881.3994 | 2562.216 |
| CSCAFQnLLPFYsPVVEDFLR          | (V) | C:Carbamic           | 881.4122 | 2562.216 |
| CSCAFQnLLPFYsPVVEDFLR          | (V) | C:Carbamic           | 881.4121 | 2562.216 |
| CSCAFQnLLPFYsPVVEDFLR          | (V) | C:Carbamic           | 881.4122 | 2562.216 |
| CSCAFQnLLPFYsPVVEDFLR          | (V) | C:Carbamic           | 881.4122 | 2562.216 |
| CSCAFQnLLPFYsPVVEDFLR          | (V) | C:Carbamic           | 881.4054 | 2562.216 |
| CSCAFQnLLPFYsPVVEDFLR          | (V) | C:Carbamic           | 881.3892 | 2562.216 |
| CSCAFQnLLPFYsPVVEDFLR          | (V) | C:Carbamic           | 881.4122 | 2562.216 |
| CSCAFQnLLPFYsPVVEDFLR          | (V) | C:Carbamic           | 881.408  | 2562.216 |
| CSCAFQnLLPFYsPVVEDFLR          | (V) | C:Carbamic           | 881.4122 | 2562.216 |
| CSCAFQnLLPFYsPVVEDFLR          | (V) | C:Carbamic           | 881.4033 | 2562.216 |
| CSCAFQnLLPFYsPVVEDFLR          | (V) | C:Carbamic           | 881.4059 | 2562.216 |
| CSCAFQnLLPFYsPVVEDFLR          | (V) | C:Carbamic           | 881.4074 | 2562.216 |
| CSCAFQnLLPFYsPVVEDFLR          | (V) | C:Carbamic           | 881.4034 | 2562.216 |
| CSCAFQnLLPFYsPVVEDFLR          | (V) | C:Carbamic           | 881.4013 | 2562.216 |
| CSCAFQnLLPFYsPVVEDFLR          | (V) | C:Carbamic           | 881.408  | 2562.216 |
| CSCAFQnLLPFYsPVVEDFLR          | (V) | C:Carbamic           | 881.408  | 2562.216 |
| CSCAFQnLLPFYsPVVEDFLR          | (V) | C:Carbamic           | 881.4017 | 2562.216 |
| CSCAFQnLLPFYsPVVEDFLR          | (V) | C:Carbamic           | 881.4005 | 2562.216 |
| CSCAFQnLLPFYsPVVEDFLR          | (V) | C:Carbamic           | 881.4121 | 2562.216 |
| CSCAFQnLLPFYsPVVEDFLR          | (V) | C:Carbamic           | 881.4059 | 2562.216 |
| CSCAFQnLLPFYsPVVEDFLR          | (V) | C:Carbamic           | 881.4054 | 2562.216 |
| CSCAFQnLLPFYsPVVEDFLR          | (V) | C:Carbamic           | 881.4054 | 2562.216 |
| CSCAFQnLLPFYsPVVEDFLR          | (V) | C:Carbamic           | 881.4013 | 2562.216 |

|                                          |     |                      |          |          |
|------------------------------------------|-----|----------------------|----------|----------|
| CSCAFQNLPPFYsPVVEDFLR                    | (V) | C:Carbamic           | 881.4098 | 2562.216 |
| CSCAFQNLPPFYsPVVEDFLR                    | (V) | C:Carbamic           | 881.4029 | 2562.216 |
| CSCVFQnLLPLYGPVVEDFIK                    | (I) | C:Carbamic           | 833.763  | 2498.246 |
| CSSAFQNLPPFYSPVVEDFIKILREVDKALADDLEKN    | (F) | C:Carbamic           | 1071.815 | 4284.19  |
| DAAQRGPGGAWAAKVISNARENIQGITDPLFKGMTRDC   | (E) |                      | 716.6988 | 4295.221 |
| DAVADLMnKgYLTEk                          | (T) | k:Acetyl             | 876.4367 | 1667.831 |
| DFHLKILKDILCEFLSNIFQALTKETVVQGVK         | (E) | C:Carbamic           | 625.3445 | 3747.055 |
| DGAEDEQLEtLTEITAELLADLCLHISKDAVADLmNk    | (G) | DGAEDEQL C:Carbamic  | 1408.994 | 4084.994 |
| DILCEFLSNIFQALTKETVVQGVKEGQLSKQKCSSAFQNL | (F) | C:Carbamic           | 954.5016 | 4768.469 |
| DKEEEEVAGGDCIGSTVYSKHWLFGVLsGLIQIVSPENTK | (S) | DKEEEEVAC C:Carbamic | 895.2339 | 4392.17  |
| DKLFDLDEKLMLEWIK                         | (N) |                      | 679.3739 | 2036.077 |
| DKLFDLDEKLMLEWIK                         | (N) |                      | 679.3542 | 2036.077 |
| DKLFDLDEKLMLEWIK                         | (N) |                      | 679.3744 | 2036.077 |
| DLCQAEDLSVVL                             | (Q) | C:Carbamic           | 681.3295 | 1361.662 |
| DLCQAEDLSVVL                             | (Q) | C:Carbamic           | 681.3276 | 1361.662 |
| DLCQAEDLSVVL                             | (Q) | C:Carbamic           | 681.3297 | 1361.662 |
| DLCQAEDLSVVL                             | (Q) | C:Carbamic           | 681.3291 | 1361.662 |
| DLKkANWIGADk                             | (Y) | k:Acetyl             | 721.8939 | 1358.743 |
| DLKksNFIGADK                             | (Y) | k:Acetyl,s:F         | 486.5728 | 1335.727 |
| DLKksNFIGADK                             | (Y) | k:Acetyl,s:F         | 486.5743 | 1335.727 |
| DLKksNFIGADK                             | (Y) | k:Acetyl,s:F         | 486.5742 | 1335.727 |
| DLKksNFIGADK                             | (Y) | k:Acetyl,s:F         | 486.5742 | 1335.727 |
| DLkksNFIGADK                             | (Y) | k:Acetyl             | 710.3666 | 1335.727 |
| DLKksNFIGADK                             | (Y) | k:Acetyl,s:F         | 486.5728 | 1335.727 |
| DLKksNFIGADK                             | (Y) | k:Acetyl,s:F         | 486.5758 | 1335.727 |
| DLKKsNFIGADk                             | (Y) | DLKKsNFIG s:Phosphor | 486.5692 | 1335.727 |
| DLPSLK                                   | (A) |                      | 336.7018 | 672.393  |
| DLPSLK                                   | (A) |                      | 336.7019 | 672.393  |
| DLPSLK                                   | (A) |                      | 336.7014 | 672.393  |
| DLPSLK                                   | (A) |                      | 336.7027 | 672.393  |
| DLPSLK                                   | (A) |                      | 336.6967 | 672.393  |
| DLPSLK                                   | (A) |                      | 336.7026 | 672.393  |
| DLPSLK                                   | (A) |                      | 336.7017 | 672.393  |
| DLPSLK                                   | (A) |                      | 336.7041 | 672.393  |
| DLPSLK                                   | (A) |                      | 336.6937 | 672.393  |
| DLPSLK                                   | (A) |                      | 336.7003 | 672.393  |
| DLPSLK                                   | (A) |                      | 336.7003 | 672.393  |
| DLPSLK                                   | (A) |                      | 336.7009 | 672.393  |
| DLPSLK                                   | (A) |                      | 336.7031 | 672.393  |
| DLPSLK                                   | (A) |                      | 336.7063 | 672.393  |
| DLPSLK                                   | (A) |                      | 336.7025 | 672.393  |
| DmWKAYSdMKEANyK                          | (K) | m:Oxidized           | 996.3973 | 1879.835 |
| DNPEGLDVYMHILQLLTTADEGIQAIVQCpAAGR       | (D) | C:Carbamic           | 742.575  | 3708.836 |
| DNPEGLDVYMHILQLLTTADEGIQAIVQCpAAGR       | (D) | C:Carbamic           | 742.5688 | 3708.836 |
| DPNHFR                                   | (P) |                      | 393.1883 | 785.369  |
| DPNHFR                                   | (P) |                      | 393.1885 | 785.369  |
| DPNHFR                                   | (P) |                      | 393.1935 | 785.369  |

|                |     |           |          |          |
|----------------|-----|-----------|----------|----------|
| DPNHFR         | (P) |           | 262.4611 | 785.369  |
| DPNHFR         | (P) |           | 393.1883 | 785.369  |
| DPNHFR         | (P) |           | 393.1948 | 785.369  |
| DPNHFR         | (P) |           | 393.1937 | 785.369  |
| DPNHFR         | (P) |           | 262.4621 | 785.369  |
| DPNHFRPAGLPDK  | (Y) |           | 732.3863 | 1463.739 |
| DPNHFRPAGLPDK  | (Y) |           | 488.5869 | 1463.739 |
| DPNHFRPAGLPDK  | (Y) |           | 488.589  | 1463.739 |
| DPNHFRPAGLPDK  | (Y) |           | 488.5875 | 1463.739 |
| DPNHFRPAGLPDK  | (Y) |           | 488.5875 | 1463.739 |
| DPNHFRPAGLPDK  | (Y) |           | 488.5877 | 1463.739 |
| DPNHFRPAGLPDK  | (Y) |           | 488.5877 | 1463.739 |
| DPNHFRPAGLPDK  | (Y) |           | 366.6939 | 1463.739 |
| DPNHFRPAGLPDK  | (Y) |           | 366.6937 | 1463.739 |
| DPNHFRPAGLPDK  | (Y) |           | 732.3858 | 1463.739 |
| DPNHFRPAGLPDK  | (Y) |           | 488.5875 | 1463.739 |
| DPNHFRPAGLPDK  | (Y) |           | 732.3858 | 1463.739 |
| DPNHFRPAGLPDKY | (-) |           | 542.9395 | 1626.802 |
| DPNHFRPAGLPDKY | (-) |           | 542.9407 | 1626.802 |
| DPNHFRPAGLPDKY | (-) |           | 813.9087 | 1626.802 |
| DPNHFRPAGLPDKY | (-) |           | 407.4577 | 1626.802 |
| DPNHFRPAGLPDKY | (-) |           | 542.9416 | 1626.802 |
| DPNHFRPAGLPDKY | (-) |           | 813.9059 | 1626.802 |
| DPNHFRPAGLPDKY | (-) |           | 813.9092 | 1626.802 |
| DPNHFRPAGLPDKY | (-) |           | 542.9395 | 1626.802 |
| DPNHFRPAGLPDKY | (-) |           | 407.4574 | 1626.802 |
| DPNHFRPAGLPDKY | (-) |           | 813.9073 | 1626.802 |
| DPnHFRPAGLPDKY | (-) | n:Deamida | 814.3993 | 1626.802 |
| DPNHFRPAGLPDKY | (-) |           | 407.4596 | 1626.802 |
| DPNHFRPAGLPDKY | (-) |           | 407.4574 | 1626.802 |
| DPNHFRPAGLPDKY | (-) |           | 542.9417 | 1626.802 |
| DPNHFRPAGLPDKY | (-) |           | 542.9417 | 1626.802 |
| DPNHFRPAGLPDKY | (-) |           | 813.9073 | 1626.802 |
| DPNHFRPAGLPDKY | (-) |           | 542.9412 | 1626.802 |
| DPnHFRPAGLPDKY | (-) | n:Deamida | 543.2724 | 1626.802 |
| DPNHFRPAGLPDKY | (-) |           | 813.9092 | 1626.802 |
| DPNHFRPAGLPDKY | (-) |           | 813.909  | 1626.802 |
| DPnHFRPAGLPDKY | (-) | n:Deamida | 814.4062 | 1626.802 |
| DPNHFRPAGLPDKY | (-) |           | 813.9092 | 1626.802 |
| DPNHFRPAGLPDKY | (-) |           | 407.4598 | 1626.802 |
| DPNHFRPAGLPDKY | (-) |           | 813.9087 | 1626.802 |
| DPNHFRPAGLPDKY | (-) |           | 813.909  | 1626.802 |
| DPnHFRPAGLPDKY | (-) | n:Deamida | 814.4006 | 1626.802 |
| DPNHFRPAGLPDKY | (-) |           | 542.9425 | 1626.802 |
| DPnHFRPAGLPDKY | (-) | n:Deamida | 814.4063 | 1626.802 |
| DPNHFRPAGLPDKY | (-) |           | 407.4611 | 1626.802 |
| DPnHFRPAGLPDKY | (-) | n:Deamida | 814.3989 | 1626.802 |

|                |     |           |          |          |
|----------------|-----|-----------|----------|----------|
| DPNHFRPAGLPDKY | (-) |           | 542.943  | 1626.802 |
| DPNHFRPH       | (G) |           | 510.245  | 1019.481 |
| DPNHFRPH       | (G) |           | 510.2438 | 1019.481 |
| DPNHFRPH       | (G) |           | 510.2441 | 1019.481 |
| DPNHFRPH       | (G) |           | 510.2438 | 1019.481 |
| DPNHFRPH       | (G) |           | 510.2469 | 1019.481 |
| DPNHFRPH       | (G) |           | 510.2462 | 1019.481 |
| DPNHFRPH       | (G) |           | 340.4998 | 1019.481 |
| DPNHFRPH       | (G) |           | 340.4994 | 1019.481 |
| DPNHFRPH       | (G) |           | 510.244  | 1019.481 |
| DPNHFRPH       | (G) |           | 340.4995 | 1019.481 |
| DPNHFRPH       | (G) |           | 340.4996 | 1019.481 |
| DPNHFRPH       | (G) |           | 510.2458 | 1019.481 |
| DPNHFRPH       | (G) |           | 510.2475 | 1019.481 |
| DPNHFRPH       | (G) |           | 510.2435 | 1019.481 |
| DPNHFRPH       | (G) |           | 510.244  | 1019.481 |
| DPNHFRPH       | (G) |           | 340.4987 | 1019.481 |
| DPNHFRPH       | (G) |           | 510.245  | 1019.481 |
| DPNHFRPH       | (G) |           | 510.2469 | 1019.481 |
| DPNHFRPH       | (G) |           | 340.4993 | 1019.481 |
| DPNHFRPH       | (G) |           | 340.502  | 1019.481 |
| DPNHFRPH       | (G) |           | 510.2464 | 1019.481 |
| DPNHFRPH       | (G) |           | 510.2469 | 1019.481 |
| DPNHFRPH       | (G) |           | 510.244  | 1019.481 |
| DPNHFRPH       | (G) |           | 510.2442 | 1019.481 |
| DPNHFRPH       | (G) |           | 510.2464 | 1019.481 |
| DPNHFRPH       | (G) |           | 510.2475 | 1019.481 |
| DPNHFRPH       | (G) |           | 510.2431 | 1019.481 |
| DPNHFRPH       | (G) |           | 340.5005 | 1019.481 |
| DPNHFRPH       | (G) |           | 510.2435 | 1019.481 |
| DPNHFRPHG      | (L) |           | 538.7566 | 1076.502 |
| DPNHFRPHGLPDK  | (Y) |           | 765.3851 | 1529.761 |
| DPNHFRPHGLPDK  | (Y) |           | 510.5936 | 1529.761 |
| DPNHFRPHGLPDK  | (Y) |           | 383.1972 | 1529.761 |
| DPNHFRPHGLPDK  | (Y) |           | 510.5929 | 1529.761 |
| DPNHFRPHGLPDK  | (Y) |           | 510.5945 | 1529.761 |
| DPNHFRPHGLPDK  | (Y) |           | 510.5942 | 1529.761 |
| DPNHFRPHGLPDK  | (Y) |           | 510.5944 | 1529.761 |
| DPNHFRPHGLPDK  | (Y) |           | 510.5882 | 1529.761 |
| DPnHFRPHGLPDK  | (Y) | n:Deamida | 383.4434 | 1529.761 |
| DPNHFRPHGLPDK  | (Y) |           | 510.593  | 1529.761 |
| DPNHFRPHGLPDK  | (Y) |           | 383.1968 | 1529.761 |
| DPnHFRPHGLPDK  | (Y) | n:Deamida | 510.9248 | 1529.761 |
| DPNHFRPHGLPDK  | (Y) |           | 510.5952 | 1529.761 |
| DPNHFRPHGLPDK  | (Y) |           | 765.3873 | 1529.761 |
| DPNHFRPHGLPDK  | (Y) |           | 510.5942 | 1529.761 |
| DPNHFRPHGLPDK  | (Y) |           | 383.1973 | 1529.761 |



|                |     |           |          |          |
|----------------|-----|-----------|----------|----------|
| DPnHFRPHGLPDK  | (Y) | n:Deamida | 510.9243 | 1529.761 |
| DPnHFRPHGLPDK  | (Y) | n:Deamida | 510.9217 | 1529.761 |
| DPNHFRPHGLPDK  | (Y) |           | 383.198  | 1529.761 |
| DPNHFRPHGLPDK  | (Y) |           | 383.1978 | 1529.761 |
| DPNHFRPHGLPDK  | (Y) |           | 510.5936 | 1529.761 |
| DPNHFRPHGLPDK  | (Y) |           | 510.5942 | 1529.761 |
| DPnHFRPHGLPDK  | (Y) | n:Deamida | 383.4431 | 1529.761 |
| DPNHFRPHGLPDK  | (Y) |           | 510.5941 | 1529.761 |
| DPNHFRPHGLPDK  | (Y) |           | 383.197  | 1529.761 |
| DPNHFRPHGLPDK  | (Y) |           | 510.5952 | 1529.761 |
| DPNHFRPHGLPDK  | (Y) |           | 510.5936 | 1529.761 |
| DPNHFRPHGLPDK  | (Y) |           | 765.387  | 1529.761 |
| DPNHFRPHGLPDK  | (Y) |           | 383.2031 | 1529.761 |
| DPnHFRPHGLPDK  | (Y) | n:Deamida | 383.4478 | 1529.761 |
| DPnHFRPHGLPDK  | (Y) | n:Deamida | 383.4442 | 1529.761 |
| DPnHFRPHGLPDK  | (Y) | n:Deamida | 383.4448 | 1529.761 |
| DPNHFRPHGLPDKY | (-) |           | 846.9084 | 1692.824 |
| DPNHFRPHGLPDKY | (-) |           | 846.919  | 1692.824 |
| DPNHFRPHGLPDKY | (-) |           | 846.9199 | 1692.824 |
| DPNHFRPHGLPDKY | (-) |           | 846.9178 | 1692.824 |
| DPnHFRPHGLPDKY | (-) | n:Deamida | 565.2749 | 1692.824 |
| DPNHFRPHGLPDKY | (-) |           | 423.9643 | 1692.824 |
| DPNHFRPHGLPDKY | (-) |           | 846.9199 | 1692.824 |
| DPNHFRPHGLPDKY | (-) |           | 564.9498 | 1692.824 |
| DPNHFRPHGLPDKY | (-) |           | 564.947  | 1692.824 |
| DPNHFRPHGLPDKY | (-) |           | 846.9178 | 1692.824 |
| DPNHFRPHGLPDKY | (-) |           | 423.9638 | 1692.824 |
| DPNHFRPHGLPDKY | (-) |           | 423.9648 | 1692.824 |
| DPNHFRPHGLPDKY | (-) |           | 846.9174 | 1692.824 |
| DPNHFRPHGLPDKY | (-) |           | 564.9481 | 1692.824 |
| DPNHFRPHGLPDKY | (-) |           | 564.9492 | 1692.824 |
| DPNHFRPHGLPDKY | (-) |           | 423.963  | 1692.824 |
| DPNHFRPHGLPDKY | (-) |           | 564.9488 | 1692.824 |
| DPNHFRPHGLPDKY | (-) |           | 423.9632 | 1692.824 |
| DPnHFRPHGLPDKY | (-) | n:Deamida | 565.2761 | 1692.824 |
| DPnHFRPHGLPDKY | (-) | n:Deamida | 565.2761 | 1692.824 |
| DPNHFRPHGLPDKY | (-) |           | 423.963  | 1692.824 |
| DPNHFRPHGLPDKY | (-) |           | 846.9175 | 1692.824 |
| DPnHFRPHGLPDKY | (-) | n:Deamida | 565.2792 | 1692.824 |
| DPnHFRPHGLPDKY | (-) | n:Deamida | 565.2775 | 1692.824 |
| DPNHFRPHGLPDKY | (-) |           | 846.92   | 1692.824 |
| DPnHFRPHGLPDKY | (-) | n:Deamida | 424.2107 | 1692.824 |
| DPnHFRPHGLPDKY | (-) | n:Deamida | 565.2764 | 1692.824 |
| DPNHFRPHGLPDKY | (-) |           | 564.9483 | 1692.824 |
| DPNHFRPHGLPDKY | (-) |           | 423.963  | 1692.824 |
| DPnHFRPHGLPDKY | (-) | n:Deamida | 847.4077 | 1692.824 |
| DPnHFRPHGLPDKY | (-) | n:Deamida | 847.4094 | 1692.824 |

|                |     |           |          |          |
|----------------|-----|-----------|----------|----------|
| DPnHFRPHGLPDKY | (-) | n:Deamida | 565.2764 | 1692.824 |
| DPNHFRPHGLPDKY | (-) |           | 564.95   | 1692.824 |
| DPnHFRPHGLPDKY | (-) | n:Deamida | 424.21   | 1692.824 |
| DPnHFRPHGLPDKY | (-) | n:Deamida | 847.4118 | 1692.824 |
| DPNHFRPHGLPDKY | (-) |           | 846.9083 | 1692.824 |
| DPnHFRPHGLPDKY | (-) | n:Deamida | 424.2092 | 1692.824 |
| DPnHFRPHGLPDKY | (-) | n:Deamida | 847.4075 | 1692.824 |
| DPNHFRPHGLPDKY | (-) |           | 846.9218 | 1692.824 |
| DPNHFRPHGLPDKY | (-) |           | 846.9231 | 1692.824 |
| DPNHFRPHGLPDKY | (-) |           | 846.9218 | 1692.824 |
| DPNHFRPHGLPDKY | (-) |           | 846.9178 | 1692.824 |
| DPNHFRPHGLPDKY | (-) |           | 423.9643 | 1692.824 |
| DPnHFRPHGLPDKY | (-) | n:Deamida | 847.4114 | 1692.824 |
| DPnHFRPHGLPDKY | (-) | n:Deamida | 847.4109 | 1692.824 |
| DPnHFRPHGLPDKY | (-) | n:Deamida | 565.2764 | 1692.824 |
| DPNHFRPHGLPDKY | (-) |           | 564.9474 | 1692.824 |
| DPNHFRPHGLPDKY | (-) |           | 564.9483 | 1692.824 |
| DPNHFRPHGLPDKY | (-) |           | 846.9218 | 1692.824 |
| DPnHFRPHGLPDKY | (-) | n:Deamida | 847.4077 | 1692.824 |
| DPnHFRPHGLPDKY | (-) | n:Deamida | 847.4119 | 1692.824 |
| DPnHFRPHGLPDKY | (-) | n:Deamida | 565.2735 | 1692.824 |
| DPNHFRPHGLPDKY | (-) |           | 423.9637 | 1692.824 |
| DPnHFRPHGLPDKY | (-) | n:Deamida | 847.4094 | 1692.824 |
| DPNHFRPHGLPDKY | (-) |           | 846.919  | 1692.824 |
| DPNHFRPHGLPDKY | (-) |           | 423.9632 | 1692.824 |
| DPNHFRPHGLPDKY | (-) |           | 564.9498 | 1692.824 |
| DPNHFRPHGLPDKY | (-) |           | 846.9218 | 1692.824 |
| DPNHFRPHGLPDKY | (-) |           | 564.9481 | 1692.824 |
| DPNHFRPHGLPDKY | (-) |           | 846.919  | 1692.824 |
| DPnHFRPHGLPDKY | (-) | n:Deamida | 565.2749 | 1692.824 |
| DPNHFRPHGLPDKY | (-) |           | 564.9492 | 1692.824 |
| DPNHFRPHGLPDKY | (-) |           | 846.9199 | 1692.824 |
| DPNHFRPHGLPDKY | (-) |           | 846.9284 | 1692.824 |
| DPNHFRPHGLPDKY | (-) |           | 564.9488 | 1692.824 |
| DPnHFRPHGLPDKY | (-) | n:Deamida | 565.2761 | 1692.824 |
| DPNHFRPHGLPDKY | (-) |           | 564.9481 | 1692.824 |
| DPNHFRPHGLPDKY | (-) |           | 846.919  | 1692.824 |
| DPNHFRPHGLPDKY | (-) |           | 564.9472 | 1692.824 |
| DPNHFRPHGLPDKY | (-) |           | 846.9084 | 1692.824 |
| DPNHFRPHGLPDKY | (-) |           | 846.9284 | 1692.824 |
| DPnHFRPHGLPDKY | (-) | n:Deamida | 847.4094 | 1692.824 |
| DPnHFRPHGLPDKY | (-) | n:Deamida | 424.2113 | 1692.824 |
| DPNHFRPHGLPDKY | (-) |           | 846.9175 | 1692.824 |
| DPnHFRPHGLPDKY | (-) | n:Deamida | 424.2117 | 1692.824 |
| DPNHFRPHGLPDKY | (-) |           | 846.9252 | 1692.824 |
| DPNHFRPHGLPDKY | (-) |           | 846.9199 | 1692.824 |
| DPNHFRPHGLPDKY | (-) |           | 564.9502 | 1692.824 |

|                                           |     |                       |          |          |
|-------------------------------------------|-----|-----------------------|----------|----------|
| DPnHFRPHGLPDKY                            | (-) | n:Deamida             | 847.4109 | 1692.824 |
| DPNHFRPHGLPDKY                            | (-) |                       | 846.919  | 1692.824 |
| DPnHFRPHGLPDKY                            | (-) | n:Deamida             | 847.4109 | 1692.824 |
| DPnHFRPHGLPDKY                            | (-) | n:Deamida             | 847.4077 | 1692.824 |
| DPNHFRPHGLPDKY                            | (-) |                       | 846.9218 | 1692.824 |
| DPnHFRPHGLPDKY                            | (-) | n:Deamida             | 847.4094 | 1692.824 |
| DPnHFRPHGLPDKY                            | (-) | n:Deamida             | 565.2792 | 1692.824 |
| DPnHFRPHGLPDKY                            | (-) | n:Deamida             | 565.2703 | 1692.824 |
| DPNHFRPHGLPDKY                            | (-) |                       | 846.9284 | 1692.824 |
| DPnHFRPHGLPDKY                            | (-) | n:Deamida             | 424.2132 | 1692.824 |
| DPnHFRPHGLPDKY                            | (-) | n:Deamida             | 565.2759 | 1692.824 |
| DPNHFRPHGLPDKY                            | (-) |                       | 564.9488 | 1692.824 |
| DPnHFRPHGLPDKY                            | (-) | n:Deamida             | 847.4119 | 1692.824 |
| DPNHFRPHGLPDKY                            | (-) |                       | 846.919  | 1692.824 |
| DPnHFRPHGLPDKY                            | (-) | n:Deamida             | 847.4075 | 1692.824 |
| DPNHFRPHGLPDKY                            | (-) |                       | 564.9488 | 1692.824 |
| DPNHFRPHGLPDKY                            | (-) |                       | 423.9652 | 1692.824 |
| DPNHFRPHGLPDKY                            | (-) |                       | 423.963  | 1692.824 |
| DPNHFRPHGLPDKY                            | (-) |                       | 564.95   | 1692.824 |
| DPnHFRPHGLPDKY                            | (-) | n:Deamida             | 565.2703 | 1692.824 |
| DPnHFRPHGLPDKY                            | (-) | n:Deamida             | 565.2735 | 1692.824 |
| DPnHFRPHGLPDKY                            | (-) | n:Deamida             | 565.2792 | 1692.824 |
| DPNPFRPAGLPDK                             | (Y) |                       | 712.3773 | 1423.733 |
| DPNYyRPPGLPDK                             | (Y) | y:Phosphor            | 827.8633 | 1531.754 |
| DPNYRPPGLPDKY                             | (-) |                       | 424.4603 | 1694.817 |
| DPPIILQEQKTVLASVSVLSAIYASR                | (A) |                       | 741.1581 | 2961.63  |
| DQWRSRSDSIVPLIGNVLRVCQYHR                 | (E) | C:Carbamic            | 1018.869 | 3054.58  |
| DSGHGAEDSR                                | (A) |                       | 515.7149 | 1030.418 |
| DSGHGAEDSR                                | (A) | DSGHGAEDSR DSGHG      | 515.7148 | 1030.418 |
| DSGHGAEDSR                                | (A) | DSGHGAEDSR DSGHG      | 515.7204 | 1030.418 |
| DTVADLmnkGYLTEKTCCLAAASCLHHK              | (F) | DTVADLmn C:Carbamic   | 1036.145 | 3047.475 |
| DTWNLFLDLVCHEFCQSDDPPIILQEQKTVLASVFSVLSAI | (A) | C:Carbamic            | 819.417  | 4911.426 |
| DVSCCELLSnVFQDLTKEnIIQALKEDHLnk           | (Q) | DVSCCELLSn C:Carbamic | 721.3436 | 3513.789 |
| DVSCCELLSnVFQDLTKEnIIQALKEDHLnk           | (Q) | DVSCCELLSn C:Carbamic | 721.3521 | 3513.789 |
| DVSCCELLSnVFQDLTKEnIIQALKEDHLnk           | (Q) | DVSCCELLSn C:Carbamic | 721.3457 | 3513.789 |
| DVSCCELLSnVFQDLTKEnIIQALKEDHLnk           | (Q) | DVSCCELLSn C:Carbamic | 721.3522 | 3513.789 |
| DVTVFLFTLCPFGRVLSFPGTWDMMLRAY             | (N) | C:Carbamic            | 662.536  | 3308.664 |
| DVTVFLFTLCPFGRVLSFPGTWDMMLRAY             | (N) | C:Carbamic            | 662.538  | 3308.664 |
| DVTVFLFTLCPFGRVLSFPGTWDMMLRAY             | (N) | C:Carbamic            | 662.5335 | 3308.664 |
| DVTVFLFTLCPFGRVLSFPGTWDMMLRAY             | (N) | C:Carbamic            | 662.5334 | 3308.664 |
| DVTVFLFTLCPFGRVLSFPGTWDMMLRAY             | (N) | C:Carbamic            | 662.5352 | 3308.664 |
| DVTVFLFTLCPFGRVLSFPGTWDMMLRAY             | (N) | C:Carbamic            | 662.5319 | 3308.664 |
| DVTVFLFTLCPFGRVLSFPGTWDMMLRAY             | (N) | C:Carbamic            | 662.5358 | 3308.664 |
| DVTVFLFTLCPFGRVLSFPGTWDMMLRAY             | (N) | C:Carbamic            | 662.5353 | 3308.664 |
| DVTVFLFTLCPFGRVLSFPGTWDMMLRAY             | (N) | C:Carbamic            | 662.5311 | 3308.664 |
| DVTVFLFTLCPFGRVLSFPGTWDMMLRAY             | (N) | C:Carbamic            | 662.5353 | 3308.664 |
| DVTVFLFTLCPFGRVLSFPGTWDMMLRAY             | (N) | C:Carbamic            | 662.5333 | 3308.664 |

|                                        |     |                  |          |          |
|----------------------------------------|-----|------------------|----------|----------|
| DVTVFLFTLCPFGRVLSFPGTWDMMLRAY          | (N) | C:Carbamic       | 662.5319 | 3308.664 |
| DVTVFLFTLCPFGRVLSFPGTWDMMLRAY          | (N) | C:Carbamic       | 662.5352 | 3308.664 |
| EEAQQAWDMWRAYSMDREANYIGADKYFHARGNYEA   | (Q) |                  | 1429     | 4284.904 |
| EAARGTWDMIRAYHDMREANYIGADK             | (Y) | EAARGTWDMIRAYHDM | 1014.163 | 3040.415 |
| EALQGAGDLGRAYWNVLtSSHQnSkR             | (Y) | t:Phosphor       | 994.8002 | 2858.429 |
| EALQGAGDLGRAYWNVLtSSHQNSKRYFYAQGNYPDAE | (L) |                  | 1192.417 | 7149.51  |
| EALQGITDPLFkGMTRDQVR                   | (E) | k:Carbanyl       | 773.3908 | 2275.186 |
| EALQGITDPLFkGMTRDQVR                   | (E) | k:Carbanyl       | 773.3908 | 2275.186 |
| EANWKKSDKYFHARGNYDA                    | (A) | EANWKKSDKYFHARGN | 1150.534 | 2300.084 |
| EANWKKSDKYFHARGNYDA                    | (A) |                  | 1150.532 | 2300.084 |
| EANWKKSDKYFHARGNYDA                    | (A) |                  | 1150.55  | 2300.084 |
| EANYIGADK                              | (Y) |                  | 490.7417 | 980.468  |
| EANYIGADK                              | (Y) |                  | 490.7406 | 980.468  |
| EANYIGADK                              | (Y) |                  | 490.7407 | 980.468  |
| EANYIGADK                              | (Y) |                  | 490.7415 | 980.468  |
| EANYIGADK                              | (Y) | EANYIGADK        | 490.7392 | 980.468  |
| EANYIGADK                              | (Y) |                  | 490.74   | 980.468  |
| EAnYIGADK                              | (Y) | n:Deamida        | 491.2316 | 980.468  |
| EANYIGADK                              | (Y) |                  | 490.7404 | 980.468  |
| EANYIGADK                              | (Y) |                  | 490.7359 | 980.468  |
| EAnYIGADK                              | (Y) | n:Deamida        | 491.2348 | 980.468  |
| EAnYIGADK                              | (Y) | n:Deamida        | 491.2312 | 980.468  |
| EAnYIGADK                              | (Y) | n:Deamida        | 491.23   | 980.468  |
| EAnYIGADK                              | (Y) | n:Deamida        | 491.2324 | 980.468  |
| EAnYIGADK                              | (Y) | n:Deamida        | 491.2302 | 980.468  |
| EAnYIGADK                              | (Y) | n:Deamida        | 491.2376 | 980.468  |
| EAnYIGADK                              | (Y) | n:Deamida        | 491.2333 | 980.468  |
| EANYIGADK                              | (Y) |                  | 490.742  | 980.468  |
| EAnYIGADK                              | (Y) | n:Deamida        | 491.2343 | 980.468  |
| EANYIGADK                              | (Y) |                  | 490.7413 | 980.468  |
| EANYIGADK                              | (Y) | EANYIGADK        | 490.7367 | 980.468  |
| EANYIGADKY                             | (F) |                  | 572.2716 | 1143.532 |
| EANYIGADKY                             | (F) |                  | 572.2721 | 1143.532 |
| EANYIGADKY                             | (F) |                  | 572.2722 | 1143.532 |
| EANYIGADKY                             | (F) |                  | 572.2711 | 1143.532 |
| EANYIGADKY                             | (F) |                  | 572.2708 | 1143.532 |
| EANYIGADKY                             | (F) |                  | 572.2713 | 1143.532 |
| EANYIGADKY                             | (F) |                  | 572.2768 | 1143.532 |
| EANYIGADKY                             | (F) |                  | 572.2722 | 1143.532 |
| EANYIGADKYF                            | (H) |                  | 645.8126 | 1290.6   |
| EANYIGADKYF                            | (H) |                  | 645.8136 | 1290.6   |
| EANYIGADKYF                            | (H) |                  | 645.8109 | 1290.6   |
| EANYIGADKYF                            | (H) |                  | 645.8133 | 1290.6   |
| EANYIGADKYF                            | (H) |                  | 645.8098 | 1290.6   |
| EANYIGADKYFHAR                         | (G) |                  | 414.4587 | 1654.797 |
| EANYIGADKYFHARGNYDAAQRGPGGAWAAKVISDGRE | (G) |                  | 819.2575 | 5728.724 |
| EANYIGADKYFHARGNYDAARRGPGGVWAA         | (K) |                  | 814.1455 | 3253.568 |

|                                           |     |            |              |                   |
|-------------------------------------------|-----|------------|--------------|-------------------|
| EANYINADKYFHAR                            | (G) |            | 428.7138     | 1711.819          |
| EANYINADKYFHAR                            | (G) |            | 428.713      | 1711.819          |
| EANYINADKYFHAR                            | (G) |            | 428.713      | 1711.819          |
| EANYINADKYFHAR                            | (G) |            | 571.2787     | 1711.819          |
| EANYINADKYFHAR                            | (G) |            | 428.7138     | 1711.819          |
| EANYINADKYFHAR                            | (G) |            | 571.2779     | 1711.819          |
| EANYINADKYFHAR                            | (G) |            | 428.7138     | 1711.819          |
| EANYINADKYFHAR                            | (G) |            | 571.2787     | 1711.819          |
| EANYINADKYFHAR                            | (G) |            | 428.7133     | 1711.819          |
| EANYKNADKYFHARGNYDAAQRGPGDTWAAKVISDA      | (R) |            | 794.9967     | 3970.886          |
| EANYRGADKYFHARGNYDAARRGPGGAWAAKVISNARI    | (Q) |            | 730.8744     | 4380.188          |
| ECKHEATSKGGAEDGQLETLAEITAEFLADLCLDISKDTVA | (T) | C:Carbamic | 819.2588     | 5728.755          |
| ECKHEATSKGGAEDGQLETLAEITAEFLADLCLDISKDTVA | (T) | C:Carbamic | 819.2588     | 5728.755          |
| EDEKDEQLETLAEITAEFLADLFVHIQKDTVADLVKKV    | (Y) |            | 1086.572     | 4343.255          |
| EEEEEVAGGDCIGSTVYSKHWLFGVLSGLIQDVALFLQEF  | (S) | C:Carbamic | 955.7926     | 5728.823          |
| EEEEEVAGGDCIGSTVYSKHWLFGVLSGLIQVSPENTKSS  | (E) | C:Carbamic | 818.9724     | 5726.67           |
| EFkRPKtVIWtFTYK                           | (L) | EFkRPKtVIV | k:Carbamyl   | 689.6934 1944.074 |
| EFkRPKtVIWtFTYK                           | (L) |            | k:Acetyl,t:F | 689.3438 1944.074 |
| EFTkTIR                                   | (R) |            | k:Acetyl     | 468.7626 894.504  |
| EFTKTIRRPFGVKYNPYTRSIQ                    | (I) |            |              | 676.1064 2701.457 |
| EGQLSKEK                                  | (C) |            |              | 459.7501 918.489  |
| EGQLSkEkCSSAFQnLLPFYSLV                   | (-) | C:Carbamic | 683.3486     | 2645.328          |
| EGQLsKQkCSSAFQnLLPFYSPVISLR               | (I) | C:Carbamic | 1074.19      | 3097.614          |
| EGYLTERTC                                 | (V) | C:Carbamic | 564.7452     | 1128.499          |
| EGYLTERTCVAAARSLTPNFQT                    | (S) | C:Carbamic | 829.0861     | 2485.214          |
| EGYLTERTCVAAARSLTPNFQT                    | (S) | C:Carbamic | 829.0875     | 2485.214          |
| EGYLTERTCVAAARSLTPNFQT                    | (S) | C:Carbamic | 829.0861     | 2485.214          |
| EGYLTERTCVAAARSLTPNFQT                    | (S) | C:Carbamic | 829.0902     | 2485.214          |
| EGYLTERTCVAAARSLTPNFQT                    | (S) | C:Carbamic | 829.0886     | 2485.214          |
| EHsLERGRATVIFsLK                          | (N) | EHsLERGRAs | :Phosphor    | 501.5007 1843.018 |
| EICVSISSDKNLGQMLLHCLYD                    | (S) | C:Carbamic | 865.7502     | 2595.225          |
| EKHVNLLHIEsR                              | (K) |            | s:Phosphor   | 777.9037 1474.812 |
| EmLLLTCLSQTEVASVWVER                      | (I) | C:Carbamic | 595.8077     | 2364.194          |
| EnAQRVTDLFK                               | (F) |            | n:Deamida    | 441.2357 1320.691 |
| ENFQRfDRLK                                | (F) |            | t:Phosphor   | 511.922 1453.755  |
| ENPAIYDsICFIMSSSTNVDLLVKVGEVVDKLFDLDEK    | (L) |            | C:Carbamic   | 1096.54 4303.14   |
| ENPAVYDSICFImsSSTNVDLLVKVGEVVDKLFDLDEK    | (L) | ENPAVYDSI  | C:Carbamic   | 1489.042 4289.124 |
| ENPAVYDSICFImsSSTNVDLLVKVGEVVDKLFDLDEK    | (L) | ENPAVYDSI  | C:Carbamic   | 1489.038 4289.124 |
| ENPAVYDSICFImsSSTNVDLLVKVGEVVDKLFDLDEK    | (L) | ENPAVYDSI  | C:Carbamic   | 1489.044 4289.124 |
| ENPAVYESICFIMsSSTNVDLLVKVGEVVDKLFDLDEK    | (L) | ENPAVYESI  | C:Carbamic   | 1096.551 4303.14  |
| EPLKPMRPSnEGTDEPRAPEEDFHLk                | (I) |            | n:Deamida    | 798.8841 3148.5   |
| EPLKPMRPSnEGTDEPRAPEEDFHLk                | (I) |            | n:Deamida    | 798.8834 3148.5   |
| EQLNDIFHLLKSHtNVLSVTPPDNFTMK              | (E) | EQLNDIFHL  | t:Phosphor   | 1106.874 3238.657 |
| EQLNDIFHLLKsHTNVLSVTPPDNFTMK              | (E) | EQLNDIFHL  | s:Phosphor   | 1106.872 3238.657 |
| EQLNDIFHLLKSHtNVLSVTPPDNFTMK              | (E) | EQLNDIFHL  | t:Phosphor   | 1106.874 3238.657 |
| EQLNDIFHLLKSHtNVLSVTPPDNFTMK              | (E) | EQLNDIFHL  | t:Phosphor   | 1106.874 3238.657 |
| EQLNDIFHLLKsHTNVLSVTPPDNFTMK              | (E) | EQLNDIFHL  | s:Phosphor   | 1106.875 3238.657 |

|                                            |     |                      |          |          |
|--------------------------------------------|-----|----------------------|----------|----------|
| EQLNDIFHLLKsHTNVLSVTPPDNFTMK               | (E) | EQLNDIFHL s:Phosphor | 1106.869 | 3238.657 |
| EQLNDIFHLLKShHTNVLSVTPPDNFTMK              | (E) | EQLNDIFHL t:Phosphor | 1106.872 | 3238.657 |
| ESFEDAKEKMREFTKTIRRPFGVKYNPYTRSIQILKDRSIT: | (V) |                      | 1017.519 | 7116.667 |
| ESFFAALHEADQSIENLAKEFPSLR                  | (P) |                      | 974.1662 | 2920.448 |
| ESFFAALHEADQSIENLAKEFPSLR                  | (P) |                      | 974.153  | 2920.448 |
| ESFFAALHEADQSIENLAKEFPSLR                  | (P) |                      | 974.1634 | 2920.448 |
| ESFQEFF                                    | (G) |                      | 467.2088 | 933.399  |
| ESFQEFFGRGHED                              | (T) |                      | 528.8963 | 1584.671 |
| ESFQEFFGRGHED                              | (T) |                      | 528.9042 | 1584.671 |
| ESFQEFFGRGHED                              | (T) |                      | 528.9052 | 1584.671 |
| ESFQEFFGRGHED                              | (T) |                      | 528.9057 | 1584.671 |
| ESFQEFFGRGHED                              | (T) |                      | 528.8999 | 1584.671 |
| ESFQEFFGRGHED                              | (T) |                      | 528.9049 | 1584.671 |
| ESFQEFFGRGHED                              | (T) |                      | 528.9051 | 1584.671 |
| ETVAQGLKEGQLSKQKCSCVFQNLPLYGPVVEDFIKILHE   | (S) | C:Carbamic           | 1430.538 | 7148.741 |
| ETVAQGLKEGQLSKQKCSCVFQNLPLYGPVVEDFIKILHE   | (S) | C:Carbamic           | 1022.104 | 7148.741 |
| ETVTKGLKEGQLsk                             | (Q) | k:Acetyl,s:F         | 841.4348 | 1517.853 |
| EVDKALAEDLKESFSLK                          | (V) |                      | 679.0465 | 2035.096 |
| EVDKALAEDLKESFSLK                          | (V) |                      | 679.0391 | 2035.096 |
| EVDKALAEDLKESFSLK                          | (V) |                      | 679.0465 | 2035.096 |
| EVDKALAEDLKESFSLK                          | (V) |                      | 679.0448 | 2035.096 |
| EVDKTLAGNLEESFPSLKR                        | (S) |                      | 711.7013 | 2133.119 |
| EWLTLK                                     | (E) |                      | 468.7635 | 936.519  |
| EYPAIYDSICFIMSSSTNVDLLmkIGEVDkLFDLDEK      | (L) | C:Carbamic           | 1125.788 | 4398.148 |
| FDLTQDYFHLLKILKDISCEFLSNIFQALTKETVTKG      | (L) | C:Carbamic           | 1066.541 | 4263.205 |
| FGDSGHGAEDSR                               | (A) |                      | 617.7593 | 1234.508 |
| FGDSGHGAEDSR                               | (A) |                      | 617.7584 | 1234.508 |
| FGDSGHGAEDSR                               | (A) |                      | 617.7591 | 1234.508 |
| FGDSGHGAEDSR                               | (A) |                      | 617.7579 | 1234.508 |
| FGDSGHGAEDSR                               | (A) | FGDSGHGAEDSR FGDS    | 617.7581 | 1234.508 |
| FGDSGHGAEDSR                               | (A) | FGDSGHGAEDSR FGDS    | 412.1777 | 1234.508 |
| FGDSGHGAEDSR                               | (A) |                      | 617.7619 | 1234.508 |
| FGDSGHGAEDSR                               | (A) | FGDSGHGAEDSR FGDS    | 617.7595 | 1234.508 |
| FGDSGHGAEDSR                               | (A) | FGDSGHGAEDSR FGDS    | 412.1765 | 1234.508 |
| FGDSGHGAEDSR                               | (A) | FGDSGHGAEDSR FGDS    | 617.761  | 1234.508 |
| FGDSGHGAEDSR                               | (A) | FGDSGHGAEDSR FGDS    | 412.1761 | 1234.508 |
| FGDSGHGAEDSR                               | (A) | FGDSGHGAEDSR FGDS    | 412.1766 | 1234.508 |
| FGDSGHGAEDSR                               | (A) |                      | 617.7621 | 1234.508 |
| FGDSGHGAEDSR                               | (A) |                      | 617.7586 | 1234.508 |
| FGDSGHGAEDSR                               | (A) |                      | 617.7601 | 1234.508 |
| FGDSGHGAEDSR                               | (A) | FGDSGHGAEDSR FGDS    | 617.7599 | 1234.508 |
| FGDSGHGAEDSR                               | (A) | FGDSGHGAEDSR FGDS    | 617.7611 | 1234.508 |
| FGDSGHGAEDSR                               | (A) | FGDSGHGAEDSR FGDS    | 412.1825 | 1234.508 |
| FGDSGHGAEDSR                               | (A) | FGDSGHGAEDSR FGDS    | 412.1813 | 1234.508 |
| FGDSGHGAEDSR                               | (A) | FGDSGHGAEDSR FGDS    | 617.761  | 1234.508 |
| FGDSGHGAEDSR                               | (A) | FGDSGHGAEDSR FGDS    | 617.7592 | 1234.508 |
| FGDSGHGAEDSR                               | (A) | FGDSGHGAEDSR FGDS    | 617.761  | 1234.508 |

|                                        |     |                      |          |          |
|----------------------------------------|-----|----------------------|----------|----------|
| FGDSGHGAEDSR                           | (A) | FGDSGHGAEDSR FGDS    | 412.1812 | 1234.508 |
| FGDSGHGAEDSR                           | (A) |                      | 617.7611 | 1234.508 |
| FGDSGHGAEDSR                           | (A) | FGDSGHGAEDSR FGDS    | 412.1784 | 1234.508 |
| FGDSGHGAEDSR                           | (A) | FGDSGHGAEDSR FGDS    | 412.1789 | 1234.508 |
| FGDSGHGAEDSR                           | (A) | FGDSGHGAEDSR FGDS    | 412.18   | 1234.508 |
| FGDSGHGAEDSRADQAANEWGR                 | (S) | FGDSGHGAAs:Phosphor  | 804.9957 | 2332.993 |
| FGDSGHGEADSR                           | (A) |                      | 617.7592 | 1234.508 |
| FGDSGHGEADSR                           | (A) |                      | 617.7608 | 1234.508 |
| FGDSGHGEADSR                           | (A) |                      | 617.7579 | 1234.508 |
| FGDSGHGEADSR                           | (A) |                      | 412.1755 | 1234.508 |
| FGDSGHGEADSR                           | (A) |                      | 412.1755 | 1234.508 |
| FGDSGHGEADSR                           | (A) |                      | 412.176  | 1234.508 |
| FGDSGHGVEDSK                           | (A) |                      | 412.1796 | 1234.534 |
| FIGEAVR                                | (G) |                      | 396.2186 | 791.441  |
| FKNSFQHLQTMLSEADPQLADVIRTQCPV          | (-) | C:Carbamic           | 1139.217 | 3373.667 |
| FLGEAAR                                | (G) |                      | 382.216  | 763.41   |
| FLQEFK                                 | (A) |                      | 406.2282 | 811.435  |
| FSFGGSGR                               | (G) |                      | 407.6995 | 814.384  |
| FSFGGSGR                               | (G) |                      | 407.7005 | 814.384  |
| FSFGGSGR                               | (G) |                      | 407.697  | 814.384  |
| FSFGGSGR                               | (G) |                      | 407.6991 | 814.384  |
| FSFGGSGR                               | (G) |                      | 407.6998 | 814.384  |
| FSFGGSGR                               | (G) |                      | 407.6996 | 814.384  |
| FSFGGSGR                               | (G) |                      | 407.6998 | 814.384  |
| FSFGGSGR                               | (G) |                      | 407.6983 | 814.384  |
| FSFGGSGR                               | (G) |                      | 407.697  | 814.384  |
| FSFGGSGR                               | (G) |                      | 407.6958 | 814.384  |
| FSFGGSGR                               | (G) |                      | 407.6953 | 814.384  |
| FSFGGSGR                               | (G) |                      | 407.697  | 814.384  |
| FSFGGSGR                               | (G) |                      | 407.6974 | 814.384  |
| FSFGGSGR                               | (G) |                      | 407.6972 | 814.384  |
| FSFGGSGR                               | (G) |                      | 407.6945 | 814.384  |
| FSFGGSGR                               | (G) |                      | 407.6971 | 814.384  |
| FSFGGSGR                               | (G) |                      | 407.6978 | 814.384  |
| FSFGGSGR                               | (G) |                      | 407.6986 | 814.384  |
| GADKYFHAKGNFDAAQRG                     | (P) |                      | 651.6559 | 1952.936 |
| GADKYFHARGNYDAAKRGPGGAWAAEVIR          | (L) |                      | 776.8861 | 3104.556 |
| GADKYFHARGNYDAAQRGPGGAWAAKVISNARETIQGI | (T) | GADKYFHARGNYDAAQ     | 804.1945 | 4017.023 |
| GAEDSR                                 | (A) |                      | 317.6436 | 634.279  |
| GAESPLRAGIVPK                          | (Y) |                      | 432.2569 | 1294.748 |
| GAESPLRAGIVPK                          | (Y) |                      | 432.2464 | 1294.748 |
| GAGGRVAAAVISnTWEGIQRAR                 | (G) | n:Deamida            | 747.7291 | 2240.201 |
| GDAIGATIYSkHWLFGVLSsLIQLInPEK          | (A) | GDAIGATIY k:Carbamyl | 1098.911 | 3170.725 |
| GDAIGATIYSkHWLFGVLSsLIQLInPEK          | (A) | GDAIGATIY k:Carbamyl | 1098.914 | 3170.725 |
| GDAIGATIYSkHWLFGVLSsLIQLInPEK          | (A) | GDAIGATIY k:Carbamyl | 1098.914 | 3170.725 |
| GDAIGATIYSkHWLFGVLSsLIQLInPEK          | (A) | GDAIGATIY k:Carbamyl | 1098.908 | 3170.725 |
| GDEsDtPLDLTLCLLEAVKQLR                 | (S) | C:Carbamic           | 530.0562 | 2486.281 |

|              |     |                      |          |          |
|--------------|-----|----------------------|----------|----------|
| GDSGHGAEDSR  | (A) |                      | 544.2245 | 1087.44  |
| GDSGHGAEDSR  | (A) |                      | 544.2271 | 1087.44  |
| GDSGHGAEDSR  | (A) | GDSGHGAEDSR GDSG     | 544.2246 | 1087.44  |
| GDSGHGAEDSR  | (A) | GDSGHGAEDSR GDSG     | 544.2254 | 1087.44  |
| GDSGHGAEDSR  | (A) | GDSGHGAEDSR GDSG     | 544.2277 | 1087.44  |
| GDSGHGAEDSR  | (A) | GDSGHGAEDSR GDSG     | 544.2261 | 1087.44  |
| GDSGHGAEDSR  | (A) | GDSGHGAEDSR GDSG     | 544.2271 | 1087.44  |
| GDSGHGAEDSR  | (A) | GDSGHGAEDSR GDSG     | 544.2284 | 1087.44  |
| GDSGHGAEDSR  | (A) |                      | 544.2253 | 1087.44  |
| GDSGHGAEDSR  | (A) | GDSGHGAEDSR GDSG     | 544.2256 | 1087.44  |
| GDSGHGAEDSR  | (A) | GDSGHGAEDSR GDSG     | 544.2291 | 1087.44  |
| GGAWAAK      | (V) |                      | 330.6788 | 660.346  |
| GGAWAAK      | (V) |                      | 330.6805 | 660.346  |
| GGAWAAK      | (V) |                      | 330.6789 | 660.346  |
| GGAWAAK      | (V) |                      | 330.6795 | 660.346  |
| GGAWAAK      | (V) |                      | 330.6771 | 660.346  |
| GLIQIVSPENAK | (S) |                      | 634.8693 | 1268.721 |
| GLKEGQLskQK  | (C) | s:Phosphor           | 669.8346 | 1215.706 |
| GLKEGQLskQK  | (C) | s:Phosphor           | 669.8324 | 1215.706 |
| GLKEGQLskQK  | (C) | s:Phosphor           | 669.8309 | 1215.706 |
| GLKEGQLskQK  | (C) | s:Phosphor           | 669.8325 | 1215.706 |
| GLKEGQLskQK  | (C) | s:Phosphor           | 669.8327 | 1215.706 |
| GLKEGQLskQK  | (C) | s:Phosphor           | 669.8325 | 1215.706 |
| GLKEGQLskQK  | (C) | s:Phosphor           | 669.8308 | 1215.706 |
| GLKEGQLskQK  | (C) | s:Phosphor           | 669.8321 | 1215.706 |
| GLKEGQLskQK  | (C) | s:Phosphor           | 669.8318 | 1215.706 |
| GLKEGQLskQK  | (C) | s:Phosphor           | 669.8487 | 1215.706 |
| GLKEGQLskQK  | (C) | s:Phosphor           | 669.8306 | 1215.706 |
| GLKEGQLskQK  | (C) | s:Phosphor           | 669.8317 | 1215.706 |
| GLKEGQLskQK  | (C) | s:Phosphor           | 669.8325 | 1215.706 |
| GLKEGQLskQK  | (C) | s:Phosphor           | 669.8301 | 1215.706 |
| GLKEGQLskQk  | (C) | GLKEGQLsk:s:Phosphor | 669.8302 | 1215.706 |
| GLKEGQLskQK  | (C) | s:Phosphor           | 669.8326 | 1215.706 |
| GLKEGQLskQK  | (C) | s:Phosphor           | 669.8351 | 1215.706 |
| GLKEGQLskQK  | (C) | s:Phosphor           | 669.8306 | 1215.706 |
| GLKEGQLskQK  | (C) | s:Phosphor           | 669.8351 | 1215.706 |
| GLKEGQLskQK  | (C) | s:Phosphor           | 669.8293 | 1215.706 |
| GLKEGQLskQK  | (C) | s:Phosphor           | 669.8346 | 1215.706 |
| GLKEGQLskQK  | (C) | s:Phosphor           | 669.8325 | 1215.706 |
| GLKEGQLskQK  | (C) | s:Phosphor           | 669.8327 | 1215.706 |
| GLLSFLGEAAR  | (G) |                      | 567.3217 | 1133.631 |
| GLLSFLGEAAR  | (G) |                      | 567.3119 | 1133.631 |
| GLLSFLGEAAR  | (G) |                      | 567.3129 | 1133.631 |
| GLLSFLGEAAR  | (G) |                      | 567.3209 | 1133.631 |
| GLLSFLGEAAR  | (G) |                      | 567.3111 | 1133.631 |
| GLLSFLGEAAR  | (G) |                      | 567.3211 | 1133.631 |
| GLLSFLGEAAR  | (G) |                      | 567.3194 | 1133.631 |



|                     |     |             |          |          |
|---------------------|-----|-------------|----------|----------|
| GLLSFLGEAAR         | (G) |             | 567.308  | 1133.631 |
| GLLSFLGEAAR         | (G) |             | 567.3227 | 1133.631 |
| GLLSFLGEAAR         | (G) |             | 567.3234 | 1133.631 |
| GLLSFLGEAAR         | (G) |             | 567.321  | 1133.631 |
| GLLSFLGEAAR         | (G) |             | 567.322  | 1133.631 |
| GLLSFLGEAAR         | (G) |             | 567.3155 | 1133.631 |
| GLLSFLGEAAR         | (G) |             | 567.318  | 1133.631 |
| GLLSFLGEAAR         | (G) |             | 567.3111 | 1133.631 |
| GLLSFLGEAAR         | (G) |             | 567.318  | 1133.631 |
| GLLSFLGEAAR         | (G) |             | 567.3224 | 1133.631 |
| GLLSFLGEAAR         | (G) |             | 567.3137 | 1133.631 |
| GLPKY               | (-) |             | 346.685  | 692.361  |
| GLPKY               | (-) |             | 346.6844 | 692.361  |
| GLPKY               | (-) |             | 346.6853 | 692.361  |
| GLPKY               | (-) |             | 346.686  | 692.361  |
| GLPKY               | (-) |             | 346.6863 | 692.361  |
| GLPKY               | (-) |             | 346.6857 | 692.361  |
| GLPKY               | (-) |             | 346.6851 | 692.361  |
| GLPKY               | (-) |             | 346.6867 | 692.361  |
| GLPKY               | (-) |             | 346.6877 | 692.361  |
| GLPKY               | (-) |             | 346.6875 | 692.361  |
| GLPKY               | (-) |             | 346.6875 | 692.361  |
| GLPKY               | (-) |             | 346.6867 | 692.361  |
| GLPKY               | (-) |             | 346.6846 | 692.361  |
| GLPKY               | (-) |             | 346.6863 | 692.361  |
| GLPKY               | (-) |             | 346.6869 | 692.361  |
| GLPKY               | (-) |             | 346.6881 | 692.361  |
| GLPKY               | (-) |             | 346.6877 | 692.361  |
| GLPKY               | (-) | GLPKY GLPKY | 346.685  | 692.361  |
| GNFDAARRGPGGVWAAEVI | (S) |             | 971.9999 | 1942.988 |
| GNWIIQKPRGTCQVLR    | (N) | C:Carbamic  | 729.4014 | 2186.202 |
| GNYDAAQR            | (G) |             | 447.7074 | 894.406  |
| GNYDAAQR            | (G) |             | 447.7096 | 894.406  |
| GNYDAAQR            | (G) |             | 447.7077 | 894.406  |
| GNYDAAQR            | (G) |             | 447.7082 | 894.406  |
| GNYDAAQR            | (G) |             | 447.7086 | 894.406  |
| GNYDAAQR            | (G) |             | 447.7084 | 894.406  |
| GNYDAAQR            | (G) |             | 447.7093 | 894.406  |
| GNYDAAQR            | (G) |             | 447.7075 | 894.406  |
| GnYDAAQR            | (G) | n:Deamida   | 448.2001 | 894.406  |
| GNYDAAQR            | (G) |             | 447.7121 | 894.406  |
| GnYDAAQR            | (G) | n:Deamida   | 448.2024 | 894.406  |
| GNYDAAR             | (R) |             | 383.679  | 766.348  |
| GNYDAAR             | (R) |             | 383.6781 | 766.348  |
| GNYDAAR             | (R) |             | 383.6775 | 766.348  |
| GNYDAAR             | (R) |             | 383.679  | 766.348  |
| GNYDAAR             | (R) |             | 383.679  | 766.348  |

|                                     |     |                    |          |          |
|-------------------------------------|-----|--------------------|----------|----------|
| GNYDAAR                             | (R) |                    | 383.6793 | 766.348  |
| GNYDAAR                             | (R) |                    | 383.6794 | 766.348  |
| GPGGAWAAEVIRLkCHGmIMAHCNLDLPGLK     | (R) | GPGGAWA C:Carbamic | 572.7788 | 3372.695 |
| GPGGAWAAEVISNAREDLQKFMGHAE          | (D) |                    | 576.4849 | 2878.369 |
| GPGGAWAAEVISNAREDLQKFMGHAE          | (D) |                    | 576.4849 | 2878.369 |
| GPGGAWAAEVISNAREDYQKFMG             | (H) |                    | 818.7295 | 2454.151 |
| GPGGAWAAK                           | (V) |                    | 407.7172 | 814.421  |
| GPGGAWAAK                           | (V) |                    | 407.7167 | 814.421  |
| GPGGAWAAK                           | (V) | GPGGAWAAK          | 407.7174 | 814.421  |
| GPGGAWAAK                           | (V) |                    | 407.7161 | 814.421  |
| GPGGAWAAK                           | (V) |                    | 407.7165 | 814.421  |
| GPGGAWAAK                           | (V) |                    | 407.7165 | 814.421  |
| GPGGAWAAK                           | (V) |                    | 407.7153 | 814.421  |
| GPGGAWAAK                           | (V) |                    | 407.7169 | 814.421  |
| GPGGAWAAK                           | (V) |                    | 407.7131 | 814.421  |
| GPGGAWAAK                           | (V) |                    | 407.719  | 814.421  |
| GPGGAWAAK                           | (V) |                    | 407.717  | 814.421  |
| GPGGAWAAK                           | (V) |                    | 407.7147 | 814.421  |
| GPGGAWAAK                           | (V) |                    | 407.7178 | 814.421  |
| GPGGAWAAK                           | (V) |                    | 407.7169 | 814.421  |
| GPGGAWAAK                           | (V) |                    | 407.7174 | 814.421  |
| GPGGAWAAK                           | (V) |                    | 407.7196 | 814.421  |
| GPGGAWAAK                           | (V) |                    | 407.7212 | 814.421  |
| GPGGAWAAK                           | (V) |                    | 407.7174 | 814.421  |
| GPGGAWAAK                           | (V) |                    | 407.7212 | 814.421  |
| GPGGAWAAKVIR                        | (G) |                    | 394.8972 | 1182.674 |
| GPGGAWAAKVISDAR                     | (E) | k:CarbamyI         | 500.2667 | 1455.77  |
| GPGGAWAAKVISDAR                     | (E) | k:CarbamyI         | 500.2654 | 1455.77  |
| GPGGAWAAKVISDAR                     | (E) | k:CarbamyI         | 500.2669 | 1455.77  |
| GPGGAWAAKVISDAR                     | (E) | k:CarbamyI         | 500.2686 | 1455.77  |
| GPGGAWAAKVISDAR                     | (E) | k:CarbamyI         | 500.2657 | 1455.77  |
| GPGGAWAAKVISDAR                     | (E) | k:CarbamyI         | 500.266  | 1455.77  |
| GPGGAWAAKVISDAR                     | (E) | k:CarbamyI         | 749.8948 | 1455.77  |
| GPGGAWAAKVISDAR                     | (E) | k:CarbamyI         | 749.8908 | 1455.77  |
| GPGGAWAAKVISDAREGFK                 | (R) | k:CarbamyI         | 654.014  | 1916.998 |
| GPGGAWAAKVISDARENIQRFTDPLFKGTTSG    | (Q) |                    | 670.3355 | 3347.713 |
| GPGGAWAAKVISDARENVQRFTDRFSF         | (G) |                    | 746.3734 | 2982.497 |
| GPGGAWAAKVISDARENVQRFTDRFSF         | (G) |                    | 746.3832 | 2982.497 |
| GPGGAWAAKVISDARENVQRFTDRFSF         | (G) |                    | 746.3838 | 2982.497 |
| GPGGAWAAKVISDARENVQRFTDRFSF         | (G) |                    | 746.3781 | 2982.497 |
| GPGGAWAAKVISNARETIQGITDPLFKMTRDQVRE | (D) | C:Carbamic         | 795.4004 | 3973.017 |
| GPGGAWAAKVISNARETIQGITDPLLK         | (G) | k:CarbamyI         | 468.6013 | 2763.515 |
| GPGGPWAAKmISGAR                     | (E) | m:Oxidized         | 491.2542 | 1455.753 |
| GPGGPWAAKmISGAR                     | (E) | m:Oxidized         | 491.2525 | 1455.753 |
| GPGGPWAAKmISGAR                     | (E) | m:Oxidized         | 491.2501 | 1455.753 |
| GPGGPWAAKmISGAR                     | (E) | m:Oxidized         | 491.2574 | 1455.753 |
| GPGGPWAAKmISGAR                     | (E) | m:Oxidized         | 491.2574 | 1455.753 |

|                                             |     |                      |          |          |
|---------------------------------------------|-----|----------------------|----------|----------|
| GPGGPWAAKmISGAR                             | (E) | m:Oxidized           | 491.262  | 1455.753 |
| GPGGRWAATVISNGR                             | (E) |                      | 500.2644 | 1498.787 |
| GPGGVWAAEVISDARENIQkLLGHGAEDTLADQAAAnEW(S)  |     | k:Carbamyl           | 708.5168 | 4202.065 |
| GPGGVWAAEVISDAREnIQkLLGHGAEDTLADQAANEW(S)   |     | GPGGVWA n:Deamida    | 708.5168 | 4202.065 |
| GPGGVWAAKVISDVREDLQRL                       | (M) |                      | 378.5465 | 2266.23  |
| GPWAAK                                      | (M) |                      | 315.176  | 629.341  |
| GSEAEAEAAAGGDAIGATlySkHWLFGVLGSLIQLInPEk(D) | (D) | GSEAEAEAty:Phosphor  | 730.8706 | 4213.145 |
| GSEAEAEAAAGGDAIGATlySkHWLFGVLGSLIQLINPEk(D) | (D) | GSEAEAEAts:Phosphor  | 730.3663 | 4213.145 |
| GSEAEAEAAAGGDAIGATlySkHWLFGVLGSLIQLINPEk(D) | (D) | GSEAEAEAty:Phosphor  | 730.3744 | 4213.145 |
| GSGGIWAAkIISrK                              | (Y) | GSGGIWAAk:Acetyl,t:F | 898.4575 | 1631.923 |
| GTWDMIR                                     | (A) | GTWDMIR GTWDMLR      | 439.7172 | 878.419  |
| GTWDMIR                                     | (A) | GTWDMIR GTWDMLR      | 439.7136 | 878.419  |
| GTWDMIR                                     | (A) | GTWDMIR GTWDMLR      | 439.7159 | 878.419  |
| GTWDMIR                                     | (A) | GTWDMIR GTWDMLR      | 439.7105 | 878.419  |
| GTWDMIR                                     | (A) | GTWDMIR GTWDMLR      | 439.7169 | 878.419  |
| GTWDMIR                                     | (A) | GTWDMIR GTWDMLR      | 439.7164 | 878.419  |
| GTWDMIR                                     | (A) | GTWDMIR GTWDMLR      | 439.7174 | 878.419  |
| GTWDMIR                                     | (A) | GTWDMIR GTWDMLR      | 439.7164 | 878.419  |
| GTWDMIR                                     | (A) | GTWDMIR GTWDMLR      | 439.7174 | 878.419  |
| GTWDMIR                                     | (A) | GTWDMIR GTWDMLR      | 439.7162 | 878.419  |
| GTWDMIR                                     | (A) | GTWDMIR GTWDMLR      | 439.7165 | 878.419  |
| GTWDMIR                                     | (A) | GTWDMIR GTWDMLR      | 439.7135 | 878.419  |
| GTWDMIR                                     | (A) | GTWDMIR GTWDMLR      | 439.7164 | 878.419  |
| GTWDMIR                                     | (A) | GTWDMIR GTWDMLR      | 439.7174 | 878.419  |
| GTWDMIR                                     | (A) | GTWDMIR GTWDMLR      | 439.7169 | 878.419  |
| GTWDMIR                                     | (A) | GTWDMIR GTWDMLR      | 439.7167 | 878.419  |
| GTWDMIR                                     | (A) | GTWDMIR GTWDMLR      | 439.7104 | 878.419  |
| GTWDMIR                                     | (A) | GTWDMIR GTWDMLR      | 439.7174 | 878.419  |
| GTWDMIR                                     | (A) | GTWDMIR GTWDMLR      | 439.7172 | 878.419  |
| GTWDMIR                                     | (A) | GTWDMIR GTWDMLR      | 439.7187 | 878.419  |
| GTWDMIR                                     | (A) | GTWDMIR GTWDMLR      | 439.7174 | 878.419  |
| GTWDMIR                                     | (A) | GTWDMIR GTWDMLR      | 439.7153 | 878.419  |
| GTWDMIR                                     | (A) | GTWDMIR GTWDMLR      | 439.7174 | 878.419  |
| GTWDMIR                                     | (A) | GTWDMIR GTWDMLR      | 439.7113 | 878.419  |
| GTWDMIR                                     | (A) | GTWDMIR GTWDMLR      | 439.7217 | 878.419  |
| GTWDMIR                                     | (A) | GTWDMIR GTWDMLR      | 439.7186 | 878.419  |
| GTWDMIR                                     | (A) | GTWDMIR m:Oxidized   | 447.7134 | 878.419  |
| GTWDMIR                                     | (A) | GTWDMIR GTWDMLR      | 439.7205 | 878.419  |
| GTWDMIR                                     | (A) | GTWDMIR GTWDMLR      | 439.7167 | 878.419  |
| GTWDMIR                                     | (A) | GTWDMIR GTWDMLR      | 439.7128 | 878.419  |
| GTWDMIR                                     | (A) | GTWDMIR GTWDMLR      | 439.717  | 878.419  |
| GTWDMIR                                     | (A) | GTWDMIR GTWDMLR      | 439.7217 | 878.419  |
| HALSGHAKVkpFDpkItCK                         | (Q) | C:Carbamic           | 575.7836 | 2134.159 |
| HEATSKGGAEDGQLETlAEITAeFLADLCLDISKDTVADL    | (M) | C:Carbamic           | 607.5855 | 4247.055 |
| HFRPAGLPDKY                                 | (-) |                      | 434.2341 | 1300.68  |
| HFRPAGLPDKY                                 | (-) |                      | 650.8461 | 1300.68  |
| HFRPAGLPDKY                                 | (-) |                      | 434.2274 | 1300.68  |

|                                     |     |            |          |          |
|-------------------------------------|-----|------------|----------|----------|
| HFRPAGLPDKY                         | (-) |            | 434.2346 | 1300.68  |
| HFRPAGLPDKY                         | (-) |            | 434.2342 | 1300.68  |
| HFRPAGLPDKY                         | (-) |            | 650.8436 | 1300.68  |
| HFRPAGLPDKY                         | (-) |            | 434.2344 | 1300.68  |
| HFRPAGLPDKY                         | (-) |            | 434.2344 | 1300.68  |
| HFRPAGLPDKY                         | (-) |            | 434.2344 | 1300.68  |
| HFRPAGLPDKY                         | (-) |            | 434.2337 | 1300.68  |
| HFRPHGLPDK                          | (Y) |            | 301.6657 | 1203.638 |
| HFRPHGLPDKY                         | (-) |            | 342.4326 | 1366.701 |
| HFRPHGLPDKY                         | (-) |            | 342.4338 | 1366.701 |
| HFRPHGLPDKY                         | (-) |            | 683.859  | 1366.701 |
| HFRPHGLPDKY                         | (-) |            | 342.4318 | 1366.701 |
| HFRPHGLPDKY                         | (-) |            | 683.8553 | 1366.701 |
| HFRPHGLPDKY                         | (-) |            | 683.8567 | 1366.701 |
| HFRPHGLPDKY                         | (-) |            | 683.8564 | 1366.701 |
| HFRPHGLPDKY                         | (-) |            | 456.2414 | 1366.701 |
| HFRPHGLPDKY                         | (-) |            | 342.4332 | 1366.701 |
| HFRPHGLPDKY                         | (-) |            | 683.8548 | 1366.701 |
| HFRPHGLPDKY                         | (-) |            | 342.4329 | 1366.701 |
| HFRPHGLPDKY                         | (-) |            | 683.8567 | 1366.701 |
| HFRPHGLPDKY                         | (-) |            | 342.4326 | 1366.701 |
| HFRPHGLPDKY                         | (-) |            | 342.4338 | 1366.701 |
| HFRPHGLPDKY                         | (-) |            | 456.2389 | 1366.701 |
| HFRPHGLPDKY                         | (-) |            | 342.4315 | 1366.701 |
| HFRPHGLPDKY                         | (-) |            | 683.8552 | 1366.701 |
| HFRPHGLPDKY                         | (-) |            | 342.4337 | 1366.701 |
| HFRPHGLPDKY                         | (-) |            | 456.2409 | 1366.701 |
| HFRPHGLPDKY                         | (-) |            | 342.4332 | 1366.701 |
| HFRPHGLPDKY                         | (-) |            | 456.2424 | 1366.701 |
| HPAIYDSICFIMSSTNVDLLVKVGEVVDK       | (L) | C:Carbamic | 834.9197 | 3336.685 |
| HPAIYDSICFIMSSTNVDLLVKVGEVVDK       | (L) | C:Carbamic | 834.9227 | 3336.685 |
| HPAIYDSICFIMSSTNVDLLVKVGEVVDK       | (L) | C:Carbamic | 834.9205 | 3336.685 |
| HPAIYDSICFIMSSTNVDLLVKVGEVVDK       | (L) | C:Carbamic | 834.9169 | 3336.685 |
| HWLFGVLSrLIQDVALFLQEFNAPDIFmGVLAKSR | (C) | s:Phosphor | 1043.306 | 4031.173 |
| HWVFGVLSGF                          | (I) |            | 574.793  | 1148.589 |
| HWVFGVLSGFIQIVSPENTk                | (S) | k:Acetyl   | 575.8011 | 2258.197 |
| IACFPDTCVTLKEDLCAVLLLLLGADPPTLLETSR | (L) | C:Carbamic | 607.3051 | 4245.149 |
| IACFPDTCVTLKEDLCAVLLLLLGADPPTLLETSR | (L) | C:Carbamic | 607.3056 | 4245.149 |
| IDEGIRVFAASDGPVK                    | (S) |            | 544.6089 | 1631.839 |
| IDSLIRVLQNMEQCQKKPENSTESNTGETK      | (K) | C:Carbamic | 696.3477 | 3477.695 |
| IEEDLPLI                            | (D) |            | 471.2689 | 941.519  |
| IEEDLPLI                            | (D) |            | 471.2709 | 941.519  |
| IEEDLPLI                            | (D) |            | 471.2687 | 941.519  |
| IEEDLPLI                            | (D) |            | 471.2547 | 941.519  |
| IEEDLPLI                            | (D) |            | 471.2702 | 941.519  |
| IEEDLPLI                            | (D) |            | 471.2701 | 941.519  |
| IEEDLPLI                            | (D) |            | 471.2624 | 941.519  |

|                                        |     |                        |          |          |
|----------------------------------------|-----|------------------------|----------|----------|
| IEEDLPLI                               | (D) |                        | 471.2696 | 941.519  |
| IEEDLPLI                               | (D) |                        | 471.2604 | 941.519  |
| IEEDLPLI                               | (D) |                        | 471.2687 | 941.519  |
| IEEDLPLI                               | (D) |                        | 471.2721 | 941.519  |
| IEEDLPLI                               | (D) |                        | 471.2648 | 941.519  |
| IEEDLPLI                               | (D) |                        | 471.2698 | 941.519  |
| IEEDLPLI                               | (D) |                        | 471.2654 | 941.519  |
| IEEDLPLI                               | (D) |                        | 471.2696 | 941.519  |
| IEEDLPLI                               | (D) |                        | 471.2718 | 941.519  |
| IEEDLPLI                               | (D) |                        | 471.2561 | 941.519  |
| IEEDLPLI                               | (D) |                        | 471.2602 | 941.519  |
| IEEGKYHL                               | (P) |                        | 494.765  | 988.51   |
| IEEGKYHLPLID                           | (S) |                        | 713.8702 | 1426.758 |
| IEEGKYHLPLID                           | (S) |                        | 476.2561 | 1426.758 |
| IEEGKYHLPLID                           | (S) |                        | 713.8797 | 1426.758 |
| IEEGKYHLPLID                           | (S) |                        | 713.8797 | 1426.758 |
| IEEGKYHLPLID                           | (S) |                        | 476.2592 | 1426.758 |
| IEEGKYHLPLID                           | (S) |                        | 476.2615 | 1426.758 |
| IEEGKYHLPLID                           | (S) |                        | 713.8702 | 1426.758 |
| IEEGKYHLPLID                           | (S) |                        | 476.2592 | 1426.758 |
| IEEGKYHLPLID                           | (S) |                        | 476.2592 | 1426.758 |
| IEEGKYHLPLID                           | (S) |                        | 476.2592 | 1426.758 |
| IEEGKYHLPLID                           | (S) |                        | 713.8755 | 1426.758 |
| IEKDLPLIDSL                            | (I) |                        | 628.3601 | 1255.714 |
| IEKSLPL                                | (V) |                        | 400.2464 | 799.492  |
| IEKVDL                                 | (P) |                        | 358.7133 | 716.419  |
| IFCSLVLGVHSQWLSFLGEAYEGAK              | (D) | C:Carbamic             | 937.8031 | 2811.417 |
| IFQDLTK                                | (E) |                        | 432.7453 | 864.482  |
| IFQDLTK                                | (E) |                        | 432.7479 | 864.482  |
| IFQEKHVN                               | (L) |                        | 507.7631 | 1014.537 |
| IFQEKHVN                               | (L) |                        | 338.8461 | 1014.537 |
| IFQEKHVN                               | (L) |                        | 338.8447 | 1014.537 |
| IFQEkHVnLLHIESRK                       | (S) | k:Carbamyl             | 679.0417 | 1991.119 |
| IFQEkHVnLLHIEsRK                       | (S) | k:Carbamyl             | 529.2688 | 1991.119 |
| IGADKYFHARGNYDAAKRGPGGAWAAEVISNAREDLQK | (F) |                        | 821.4269 | 4103.059 |
| IGADKYFPPRGKYDAAR                      | (R) | IGADKYFPPRGKYDAAR      | 642.3282 | 1925.003 |
| IGkGkYnLPLIDsLIR                       | (V) | IGkGkYnLP k:Acetyl,n:l | 655.6792 | 1800.074 |
| IGkGkYnLPLIDsLIR                       | (V) | k:Acetyl,s:F           | 655.3468 | 1800.074 |
| IIFCFLILGVNSR                          | (E) | C:Carbamic             | 517.958  | 1551.872 |
| IIFCFLILGVNSR                          | (E) | C:Carbamic             | 517.9563 | 1551.872 |
| IIFCFLILGVNSR                          | (E) | C:Carbamic             | 517.9592 | 1551.872 |
| IIFQRMIFPK                             | (V) |                        | 431.5833 | 1292.755 |
| IIFQRMIFPK                             | (V) |                        | 431.5834 | 1292.755 |
| IISTGRkyFQGLMnR                        | (Y) | k:Carbamyl             | 609.9789 | 1783.964 |
| IKILHEVDKALADDLEKSFPGLK                | (V) |                        | 645.6137 | 2579.444 |
| ILEAAKQVR                              | (S) |                        | 343.2076 | 1027.626 |
| ILEAAKQVR                              | (S) |                        | 343.2152 | 1027.626 |

|                                 |     |                        |          |          |
|---------------------------------|-----|------------------------|----------|----------|
| ILEAAKQVR                       | (S) |                        | 343.2166 | 1027.626 |
| ILEAAKQVR                       | (S) |                        | 343.2184 | 1027.626 |
| ILGVNSREWLTLFLKEAGQGAK          | (D) |                        | 773.0992 | 2317.266 |
| ILGVSSQGWGTFLKEAGQGAK           | (D) |                        | 712.0616 | 2134.129 |
| ILHEVDKALANDLEKSFPS             | (L) |                        | 532.2791 | 2126.113 |
| ILHEVDKAV                       | (A) |                        | 512.297  | 1023.583 |
| ILHEVDKAVAS                     | (D) |                        | 394.5632 | 1181.652 |
| ILHEVDkTLADDLEESFPSLkVQt        | (-) | ILHEVDkTL k:Carbamyl   | 724.096  | 2727.409 |
| ILHEVDkTLADDLEESFPSLkVQt        | (-) | ILHEVDkTL k:Carbamyl   | 724.0899 | 2727.409 |
| ILHEVDkTLADDLEESFPSLkVQt        | (-) | k:Carbamyl             | 724.0976 | 2727.409 |
| ILHEVDkTLADDLEESFPSLkVQt        | (-) | ILHEVDkTL k:Carbamyl   | 724.0935 | 2727.409 |
| ILHEVDktLADDLEESFPSLkVQT        | (-) | k:Carbamyl             | 579.4783 | 2727.409 |
| ILHEVDKTLAGNLE                  | (E) |                        | 517.9582 | 1551.838 |
| ILHEVDKTLAGNLE                  | (E) |                        | 517.954  | 1551.838 |
| ILHEVDKTLAGNLE                  | (E) |                        | 517.954  | 1551.838 |
| ILHEVDKtLAGnLEESFPSLkR          | (S) | t:Phosphor             | 874.1056 | 2496.346 |
| ILHEVDKTLAGnLEEsFPSLkR          | (S) | n:Deamida              | 874.1036 | 2496.346 |
| ILHEVDKtLAGnLEESFPSLkR          | (S) | ILHEVDKtL/t:Phosphor   | 874.102  | 2496.346 |
| ILHEVDKtLAGnLEESFPSLkR          | (S) | ILHEVDKtL/t:Phosphor   | 874.1065 | 2496.346 |
| ILHEVDKtLAGnLEESFPSLkR          | (S) | ILHEVDKtL/t:Phosphor   | 874.1065 | 2496.346 |
| ILHEVDKTLAGNLEESFPSLkVQT        | (-) | k:Acetyl               | 904.1571 | 2668.419 |
| ILHEVDKVLADYLE                  | (E) |                        | 552.9601 | 1656.884 |
| ILHEVDKVLADYLE                  | (E) |                        | 552.9596 | 1656.884 |
| ILHEVDKVLADYLE                  | (E) |                        | 552.959  | 1656.884 |
| ILHEVDKVLADYLE                  | (E) |                        | 552.9603 | 1656.884 |
| ILHEVDkVLADYLEENFPSLKEK         | (H) | k:Carbamyl             | 555.2904 | 2729.44  |
| ILHEVDkVLADYLEENfPSLKEK         | (H) | n:Deamida              | 925.1369 | 2729.44  |
| ILHEVDkVLADYLEENFPSLKEK         | (H) | ILHEVDkVL k:Carbamyl   | 555.2842 | 2729.44  |
| ILHEVDkVLADyLEENFPSLKEK         | (H) | ILHEVDkVL k:Acetyl,y:f | 724.1028 | 2729.44  |
| ILHEVDkVLADYLEENFPSLKEK         | (H) | k:Carbamyl             | 555.2862 | 2729.44  |
| ILHEVDkVLADYLEENfPSLKEK         | (H) | ILHEVDkVL n:Deamida    | 925.1382 | 2729.44  |
| ILHEVDkVLADYLEENfPSLKEK         | (H) | ILHEVDkVL n:Deamida    | 925.1383 | 2729.44  |
| ILHEVDkVLADyLEENFPSLKEK         | (H) | k:Acetyl,y:f           | 579.4835 | 2729.44  |
| ILHEVDkVLADYLEENfPsLKEVALSACGFK | (G) | C:Carbamic             | 610.6434 | 3534.819 |
| ILHEVDnVLADDLQESFPTLkDQS        | (-) | n:Deamida              | 693.3401 | 2726.352 |
| ILILGVDSQR                      | (W) |                        | 371.894  | 1113.663 |
| ILIVGTEAVDLNFPIQAIQGGHDMWKAYR   | (D) |                        | 814.687  | 3255.698 |
| ILKDILCE                        | (F) | C:Carbamic             | 502.2757 | 1003.549 |
| ILKDILCEFLSNI                   | (F) | C:Carbamic             | 526.6153 | 1577.861 |
| ILkDILCEFLSNIFQALTK             | (E) | C:Carbamic             | 577.813  | 2266.252 |
| ILKDILCEFLsNIFQALTkETVVQGvK     | (E) | ILKDILCEFL: C:Carbamic | 808.1815 | 3106.722 |
| ILKDILCEFLsNIFQALTkETVVQGvK     | (E) | ILKDILCEFL: C:Carbamic | 808.173  | 3106.722 |
| ILKDISCEFLsIIFQVLTkEtVAQGLK     | (E) | C:Carbamic             | 814.1851 | 3093.727 |
| ILkDISCEFLSnIFQALTkETVAQGLK     | (E) | C:Carbamic             | 631.5455 | 3066.654 |
| ILKDISCEFLSNIFQALTkETVT         | (K) | C:Carbamic             | 890.8017 | 2670.406 |
| ILKDIscEFLSNIFQALTkETVTK        | (G) | ILKDIscEFL: C:Carbamic | 576.4906 | 2798.501 |
| ILKDISCEFLSNIFQVLTkETVAQGVKEG   | (Q) | C:Carbamic             | 817.4507 | 3266.734 |

|                                            |     |           |            |          |          |
|--------------------------------------------|-----|-----------|------------|----------|----------|
| ILKDISCEFLSNIFQVLTKETVAQGVKEG              | (Q) |           | C:Carbamic | 817.4534 | 3266.734 |
| ILKDISCEFLSNIFQVLTKETVAR                   | (G) |           | C:Carbamic | 581.6935 | 2824.528 |
| ILKDISCEFLSnILQALTKETVTQGLK                | (E) |           | C:Carbamic | 621.9383 | 3062.681 |
| ILKDISCEFLSNILQALTKETVTQGLK                | (E) |           | C:Carbamic | 621.9479 | 3062.681 |
| ILKDISCEFLSnILQALTKETVTQGLK                | (E) |           | C:Carbamic | 621.9304 | 3062.681 |
| ILKDISCEFLSSIFQTLTK                        | (E) |           | C:Carbamic | 762.4054 | 2243.199 |
| ILKDISCEFLSSIFQTLTKETVAQGLKEGQLSKQKCSCVFQN | (K) |           | C:Carbamic | 1193.115 | 7153.734 |
| ILQEQK                                     | (T) | ILQEQK    |            | 379.7222 | 758.441  |
| ILREVDk                                    | (A) |           | k:Acetyl   | 457.7689 | 872.52   |
| ILREVDKA                                   | (L) |           |            | 472.2905 | 943.557  |
| ILREVDKA                                   | (L) |           |            | 472.2837 | 943.557  |
| ILREVDKTLAGNLE                             | (E) |           |            | 524.29   | 1570.88  |
| ILRVCQYHR                                  | (E) |           | C:Carbamic | 415.5568 | 1244.668 |
| ILRVCQYHR                                  | (E) |           | C:Carbamic | 415.5538 | 1244.668 |
| IQEHPAIYDSICFIMSSSTNVDLLVKVGEVVDK          | (L) |           | C:Carbamic | 618.6512 | 3706.871 |
| IREHPAIYDSMCFIMSSSTNVDLLVKVG               | (E) |           | C:Carbamic | 637.3263 | 3182.568 |
| IREnPAIYDSICFIMSSSTnVDLLVK                 | (V) |           | C:Carbamic | 996.4893 | 2985.506 |
| IRENPAVY                                   | (E) |           |            | 481.2564 | 961.51   |
| IRENPAVYDSI                                | (C) |           |            | 638.8226 | 1276.653 |
| IRENPAVYDSI                                | (C) |           |            | 638.8233 | 1276.653 |
| IRENPAVYDSI                                | (C) |           |            | 638.8256 | 1276.653 |
| IRENPAVYDSICFI                             | (M) |           | C:Carbamic | 848.9159 | 1696.836 |
| IRENPAVYDSICFI                             | (M) |           | C:Carbamic | 848.9195 | 1696.836 |
| IRENPAVYDSICFI                             | (M) |           | C:Carbamic | 848.9076 | 1696.836 |
| IRENPsVYVSFCFImSSSTsADLLVKVGEVVDK          | (L) | IRENPsVYV | C:Carbamic | 1284.926 | 3676.86  |
| IREYPAIYDSICFIMSSSTNVDLLVKVGEVVDKFLDLDEKLM | (Q) |           | C:Carbamic | 876.4383 | 6129.143 |
| IRQQTsVCPNLCFIMSSSTNTDLEK                  | (V) |           | C:Carbamic | 761.3643 | 3042.469 |
| ISCEFLSSIFQTLTK                            | (E) |           | C:Carbamic | 591.9802 | 1773.909 |
| ISCEFLSSIFQTLTK                            | (E) |           | C:Carbamic | 591.979  | 1773.909 |
| ISCEFLSSIFQTLTK                            | (E) |           | C:Carbamic | 591.9803 | 1773.909 |
| ISCEFLSSIFQTLTK                            | (E) |           | C:Carbamic | 591.9841 | 1773.909 |
| ISCEFLSSIFQTLTK                            | (E) |           | C:Carbamic | 591.9794 | 1773.909 |
| ISCEFLSSIFQTLTK                            | (E) |           | C:Carbamic | 591.9818 | 1773.909 |
| ISCEFLSSIFQTLTK                            | (E) |           | C:Carbamic | 591.9796 | 1773.909 |
| ISCEFLSSIFQTLTK                            | (E) |           | C:Carbamic | 591.979  | 1773.909 |
| ISDAREAVQKFTGHGAEDSRADQFANEWGR             | (S) |           |            | 670.5321 | 3348.574 |
| ISDAREKSQRITDLFK                           | (F) |           |            | 636.3454 | 1907.034 |
| ISDAREKSQRITDLFK                           | (F) |           |            | 636.3439 | 1907.034 |
| ISDAREKSQRITDLFK                           | (F) |           |            | 636.3473 | 1907.034 |
| ISDAREKSQRITDLFK                           | (F) |           |            | 636.343  | 1907.034 |
| ISDAREKSQRITDLFK                           | (F) |           |            | 636.3463 | 1907.034 |
| ISDAREKSQRITDLFK                           | (F) |           |            | 636.3464 | 1907.034 |
| ISDAREKSQRITDLFK                           | (F) |           |            | 636.3435 | 1907.034 |
| ISDAREKSQRITDLFK                           | (F) |           |            | 636.3435 | 1907.034 |
| ISDAREKSQRITDLFK                           | (F) |           |            | 636.3449 | 1907.034 |
| ISDAREKSQRITDLFK                           | (F) |           |            | 636.3545 | 1907.034 |
| ISDAREKSQRITDLFK                           | (F) |           |            | 636.3408 | 1907.034 |

|                                            |     |                       |          |          |
|--------------------------------------------|-----|-----------------------|----------|----------|
| ISDGRENFQRFTDRFSFGGSGR                     | (G) |                       | 634.8181 | 2536.208 |
| ISDLDHCANRVLMYGSELDA                       | (D) | C:Carbamic            | 760.3447 | 2279.043 |
| ITDLIKYGDS                                 | (G) |                       | 562.7987 | 1124.583 |
| ITDLIKYGDSGHGVEDsK                         | (A) | s:Phosphor            | 671.9899 | 1933.95  |
| ITDLIKYGDSGHGVEDsK                         | (A) | s:Phosphor            | 671.9834 | 1933.95  |
| ITDLIKYGDSGHGVEDsK                         | (A) | s:Phosphor            | 671.9856 | 1933.95  |
| ITDLIKYGDSGHGVEDsK                         | (A) | s:Phosphor            | 671.9858 | 1933.95  |
| ITDLIKYGDSGHGVEDSK                         | (A) | ITDLIKYGDS:s:Phosphor | 671.9858 | 1933.95  |
| ITDLIKYGDSGHGVEDsK                         | (A) | s:Phosphor            | 671.9871 | 1933.95  |
| ITDLIKYGDSGHGVEDsK                         | (A) | s:Phosphor            | 671.9823 | 1933.95  |
| ITDLIKYGDSGHGVEDsK                         | (A) | s:Phosphor            | 671.9814 | 1933.95  |
| ITDLLK                                     | (F) | ITDLLK ITDLIK         | 351.7246 | 702.44   |
| ITDLLK                                     | (F) | ITDLLK ITDLIK         | 351.7235 | 702.44   |
| ITDLLK                                     | (F) | ITDLLK ITDLIK         | 351.7256 | 702.44   |
| ITDLLK                                     | (F) | ITDLLK ITDLIK         | 351.7273 | 702.44   |
| ITDLLK                                     | (F) | ITDLLK ITDLIK         | 351.727  | 702.44   |
| ITDLLK                                     | (F) | ITDLLK ITDLIK         | 351.7256 | 702.44   |
| ITDLLK                                     | (F) | ITDLLK ITDLIK         | 351.7228 | 702.44   |
| ITDLLK                                     | (F) | ITDLLK ITDLIK         | 351.7241 | 702.44   |
| ITDLLK                                     | (F) | ITDLLK ITDLIK         | 351.7241 | 702.44   |
| ITDLLK                                     | (F) | ITDLLK ITDLIK         | 351.7233 | 702.44   |
| ITDLLK                                     | (F) | ITDLLK ITDLIK         | 351.7246 | 702.44   |
| ITDLLK                                     | (F) | ITDLLK ITDLIK         | 351.7232 | 702.44   |
| ITDLLK                                     | (F) | ITDLLK ITDLIK         | 351.7245 | 702.44   |
| ITDLLK                                     | (F) | ITDLLK ITDLIK         | 351.727  | 702.44   |
| ITDLLK                                     | (F) | ITDLLK ITDLIK         | 351.726  | 702.44   |
| ITDLLK                                     | (F) | ITDLLK ITDLIK         | 351.723  | 702.44   |
| ITDLLR                                     | (F) |                       | 365.7257 | 730.446  |
| ITDLLRFGDS                                 | (G) |                       | 568.8053 | 1136.595 |
| ITDRLK                                     | (F) |                       | 373.2352 | 745.457  |
| ITDRLKFGDS                                 | (G) |                       | 576.2958 | 1151.605 |
| ITGHGAEDSKADQAANEW                         | (G) |                       | 950.4142 | 1899.847 |
| ITILREVDK                                  | (A) |                       | 543.822  | 1086.652 |
| ITILREVDK                                  | (A) |                       | 362.8849 | 1086.652 |
| ITSEFLADLCIHIPK                            | (E) | C:Carbamic            | 586.313  | 1756.93  |
| IVFCSLVMGVTSESWHSFFK                       | (E) | C:Carbamic            | 787.716  | 2361.141 |
| IVLALLVEANAQSGRFMK                         | (Q) |                       | 654.0518 | 1960.105 |
| IVPCILEAAKQVRSEnPEGLDVYmHILQLLTTVDDGIEAIVC | (D) | C:Carbamic            | 773.539  | 5348.721 |
| IVPCILEAAKQVRSENTEGLDVYMHILQLLTTVDDGIIQAIV | (Q) | C:Carbamic            | 761.7388 | 4565.399 |
| IVPCLLEAAR                                 | (Q) | C:Carbamic            | 381.2205 | 1141.64  |
| IVPCLLEAAR                                 | (Q) | C:Carbamic            | 381.2196 | 1141.64  |
| IVPCLLEAAR                                 | (Q) | C:Carbamic            | 381.2125 | 1141.64  |
| IVPCVLEAAK                                 | (Q) | C:Carbamic            | 571.3176 | 1099.618 |
| IVPCVLEAAK                                 | (Q) | C:Carbamic            | 571.3116 | 1099.618 |
| IVPCVLEAAKQIRSDNPVGLDVYMHILQLLTTVD         | (D) | C:Carbamic            | 956.0106 | 3821.034 |
| IVPCVLEAAKQVRSEnLEGLDVYMHILQLLTTVDDGMK     | (A) | C:Carbamic            | 869.0514 | 4298.223 |
| IVPCVLEAAKQVRSEnLEGLDVYMHILQLLTTVDDGMK     | (A) | C:Carbamic            | 869.0449 | 4298.223 |



|                                           |     |                      |          |          |
|-------------------------------------------|-----|----------------------|----------|----------|
| IVPCVLEAAKQVRSEnLEGLDVYMHILQLLTTVDDGMk    | (A) | C:Carbamic           | 869.0601 | 4298.223 |
| IVPCVLEAAKQVRSEnLEGLDVYMHILQLLTTVDDGMk    | (A) | C:Carbamic           | 869.0412 | 4298.223 |
| IVPCVLEAAKQVRSEnLEGLDVYMHILQLLTTVDDGMk    | (A) | C:Carbamic           | 869.0577 | 4298.223 |
| IVPCVLEAAKQVRSEnLEGLDVYMHILQLLTTVDDGMk    | (A) | C:Carbamic           | 869.0651 | 4298.223 |
| IVPCVLEAAKQVRSEnLEGLDVYMHILQLLTTVDDGMk    | (A) | C:Carbamic           | 1086.054 | 4298.223 |
| IVPCVLEAAKQVRSEnLEGLDVYMHILQLLTTVDDGMk    | (A) | C:Carbamic           | 869.2465 | 4298.223 |
| IVPCVLEAAKQVRSEnLEGLDVYMHILQLLTTVDDGMk    | (A) | C:Carbamic           | 869.0524 | 4298.223 |
| IVPCVLEAAKQVRSEnLEGLDVYMHILQLLTTVDDGMk    | (A) | C:Carbamic           | 869.0661 | 4298.223 |
| IVPCVLEAAKQVRSEnLEGLDVYMHILQLLTTVDDGMk    | (A) | C:Carbamic           | 869.0385 | 4298.223 |
| IVsCVLEAAK                                | (Q) | C:Carbamic           | 585.2952 | 1089.597 |
| IVSPENTKSR                                | (S) |                      | 377.5469 | 1130.616 |
| IVSPENTKSR                                | (S) |                      | 565.8075 | 1130.616 |
| IWDmsMDHDVALFLQEFnAPEILLGVMAK             | (S) | m:Oxidized           | 695.5305 | 3333.636 |
| IWDMsmDHDVALFLQEFnAPEILLGVMAK             | (S) | s:Phosphor           | 695.5286 | 3333.636 |
| IWDMsMDHDVALFLQEFnAPEILLGVMAK             | (S) | s:Phosphor           | 1138.867 | 3333.636 |
| IWDMsMDHDVALFLQEFnAPEILLGVMAksK           | (C) | n:Deamida            | 918.951  | 3548.763 |
| KAnWIGADK                                 | (Y) | n:Deamida            | 502.2649 | 1002.537 |
| KANWIGADKYFHA                             | (R) |                      | 507.5842 | 1520.764 |
| kAnWIGADkYFHAR                            | (G) | k:Acetyl,n:l         | 881.4327 | 1676.866 |
| KDGAEDGQLEtLAEITAEFLADLCLDISKDTVADLmNK    | (G) | KDGAEDGC:C:Carbamic  | 607.8673 | 4153.02  |
| KFDLtQDYFHLK                              | (I) | t:Phosphor           | 545.6001 | 1554.795 |
| KFDLTQDyFHLK                              | (I) | KFDLTQDyf y:Phosphor | 545.6006 | 1554.795 |
| KFDLTQDyFHLK                              | (I) | KFDLTQDyf y:Phosphor | 545.6024 | 1554.795 |
| KFDLtQDYFHLK                              | (I) | t:Phosphor           | 545.6016 | 1554.795 |
| KFDLTQDyFHLK                              | (I) | KFDLTQDyf y:Phosphor | 545.6017 | 1554.795 |
| KFDLTQDyFHLK                              | (I) | KFDLTQDyf y:Phosphor | 545.6024 | 1554.795 |
| KNLLPLYCSVVKDFLKVLEADKALVDNLEKDFPSLK      | (A) | C:Carbamic           | 1075.571 | 4299.346 |
| KNLPLLSKYCGYREDNIPQLEDVSNFLKERTGFSIR      | (P) | C:Carbamic           | 1075.809 | 4300.218 |
| KNLPLLSKYCGYREDNIPQLEDVSNFLKERTGFSIR      | (P) | C:Carbamic           | 1075.813 | 4300.218 |
| KNLPLLSKYCGYREDNIPQLEDVSNFLKERTGFSIR      | (P) | C:Carbamic           | 1075.809 | 4300.218 |
| KNLPLLSKYCGYREDNIPQLEDVSNFLKERTGFSIR      | (P) | C:Carbamic           | 1075.809 | 4300.218 |
| KNSDKYFHARGNYDAAQRGPGGAWAAKVISDAREGFKF    | (M) |                      | 600.1723 | 4195.108 |
| KPENSVESNTEETKKSDDLQEDFHLKILKDISCEF       | (L) | C:Carbamic           | 690.6872 | 4139.012 |
| KVISNARETIQGITDPLFKGMTRDQVREDSK           | (A) |                      | 589.653  | 3532.854 |
| LADETPRLFPSLR                             | (S) |                      | 505.6112 | 1514.833 |
| LADETPRLFPSLR                             | (S) |                      | 505.6073 | 1514.833 |
| LCQADDPPIIVQEQTVLASIFSVLSAMYASRVEQEYLKIEI | (S) | C:Carbamic           | 962.9252 | 4810.505 |
| LDAIGETIYSKHWIFSTLTRLINMVSEHSEENTEGQMQLSI | (V) | C:Carbamic           | 819.104  | 5727.641 |
| LDLPGLK                                   | (R) |                      | 378.237  | 755.466  |
| LDLPGLK                                   | (R) |                      | 378.2367 | 755.466  |
| LDLPGLK                                   | (R) |                      | 378.2375 | 755.466  |
| LDLPGLK                                   | (R) |                      | 378.2388 | 755.466  |
| LDVYMHILQLLTTVDDGIQAIVQSPDTGK             | (D) |                      | 637.5451 | 3183.661 |
| LEESFPSLK                                 | (V) |                      | 525.2841 | 1049.551 |
| LEESFPSLK                                 | (V) |                      | 525.2774 | 1049.551 |
| LEESFPSLK                                 | (V) |                      | 525.2805 | 1049.551 |
| LEESFPSLK                                 | (V) |                      | 525.2821 | 1049.551 |

|                                         |     |                       |          |          |
|-----------------------------------------|-----|-----------------------|----------|----------|
| LENVEHCQKK                              | (P) | C:Carbamic            | 428.8878 | 1284.637 |
| LENVEHCQKK                              | (P) | C:Carbamic            | 428.8859 | 1284.637 |
| LESLQSTQK                               | (A) |                       | 517.2751 | 1033.552 |
| LESLQSTQK                               | (A) |                       | 517.2771 | 1033.552 |
| LFDLDEELmGSWITSSSEnKEDDDENQLDVIFCLLEAAk | (Q) | LFDLDEELn C:Carbamic  | 956.8396 | 4679.1   |
| LFDLDEELMLnWIKnGTCRSVGPSVDDSPPEELPDFK   | (I) | C:Carbamic            | 834.3954 | 4165.973 |
| LFDLDEELMLnWIKnGTCRSVGPSVDDSPPEELPDFK   | (I) | C:Carbamic            | 834.3912 | 4165.973 |
| LFDLDEkLmLDWIRsGAAAPLDQPQEDSEEQPVFK     | (I) | k:Acetyl,m:           | 1043.006 | 4030.974 |
| LFDLDEkLmLEWIK                          | (N) | k:Carbamyl            | 617.9978 | 1792.955 |
| LFDLDEkLmLEWVRNGAAQPLDQPQEESEEQPVFR     | (L) | m:Oxidized            | 835.4179 | 4157.028 |
| LFDLDETLMLD                             | (W) |                       | 662.8192 | 1324.634 |
| LFDLDETLMLD                             | (W) |                       | 662.8168 | 1324.634 |
| LFDLDETLMLD                             | (W) |                       | 662.8172 | 1324.634 |
| LFPGLLFCSLVLGVsGQWYSFVSEAAQGAWDMWRAYSc  | (E) | LFPGLLFCsI C:Carbamic | 783.7032 | 4601.188 |
| LFPsLRSCFK                              | (S) | C:Carbamic            | 627.8436 | 1254.666 |
| LFTGIVFCsLVMGVTSEnWFSFFkEALQGAGDLGRAYWN | (R) | LFTGIVFCsI C:Carbamic | 810.0992 | 5499.693 |
| LFTGIVFCsLVMGVTSESWSFFk                 | (E) | C:Carbamic            | 953.1398 | 2798.404 |
| LFTGIVFCsLVMGVTSESWSFFk                 | (E) | C:Carbamic            | 953.1445 | 2798.404 |
| LFTGIVFCsLVMGVTSESWSFFk                 | (E) | C:Carbamic            | 953.121  | 2798.404 |
| LFTGIVFCsLVMGVTSESWSFFkEALQGVGDmGR      | (A) | C:Carbamic            | 794.9896 | 3911.928 |
| LFTGLIFcSLVLGVHSQWLSFLGEAYEGKTHG        | (G) | C:Carbamic            | 892.4633 | 3566.814 |
| LFTGLIFcSLVLGVsSQWYSFIGEAAQGAWDMYRAYSDM | (Y) | LFTGLIFcSL C:Carbamic | 827.7328 | 4881.34  |
| LFTGLILcSLVLGVHSQWWSFFGEAYEGAK          | (D) | LFTGLILcSL C:Carbamic | 708.3419 | 3415.718 |
| LFTGLILcSLVLGVHSQWWSFFGEAYEGAK          | (D) | LFTGLILcSL C:Carbamic | 708.5406 | 3415.718 |
| LFTGLVFCsLVLGVsSEWYSFLGEAAQGAWDMWRAYSD  | (Y) | LFTGLVFCsI C:Carbamic | 810.0857 | 5567.617 |
| LFVAGVLLILIVETnAQWYK                    | (F) | n:Deamida             | 570.069  | 2276.305 |
| LGEAAR                                  | (G) |                       | 308.6745 | 616.341  |
| LGEAAR                                  | (G) |                       | 308.6745 | 616.341  |
| LGEAAR                                  | (G) |                       | 308.6746 | 616.341  |
| LGEAAR                                  | (G) |                       | 308.6754 | 616.341  |
| LGEAAR                                  | (G) |                       | 308.6751 | 616.341  |
| LGEAAR                                  | (G) |                       | 308.6745 | 616.341  |
| LGEAAR                                  | (G) |                       | 308.6744 | 616.341  |
| LGEVVDKLF                               | (D) | LGEVVDKLF IGEVDKL     | 510.2955 | 1019.577 |
| LGEVVDKLF                               | (D) | LGEVVDKLF IGEVDKL     | 510.2977 | 1019.577 |
| LGEVVDKLF                               | (D) | LGEVVDKLF IGEVDKL     | 510.2971 | 1019.577 |
| LGEVVDKLF                               | (D) | LGEVVDKLF IGEVDKL     | 510.2967 | 1019.577 |
| LGEVVDKLF                               | (D) | LGEVVDKLF IGEVDKL     | 510.296  | 1019.577 |
| LGEVVDKLF                               | (D) | LGEVVDKLF IGEVDKL     | 510.2908 | 1019.577 |
| LGEVVDKLF                               | (D) | LGEVVDKLF IGEVDKL     | 510.294  | 1019.577 |
| LGEVVDKLF                               | (D) | LGEVVDKLF IGEVDKL     | 510.2989 | 1019.577 |
| LGEVVDKLF                               | (D) | LGEVVDKLF IGEVDKL     | 510.2908 | 1019.577 |
| LGEVVDKLF                               | (D) | LGEVVDKLF IGEVDKL     | 510.2921 | 1019.577 |
| LGEVVDKLF                               | (D) | LGEVVDKLF IGEVDKL     | 510.2964 | 1019.577 |
| LGEVVDKLF                               | (D) | LGEVVDKLF IGEVDKL     | 510.2989 | 1019.577 |
| LGEVVDKLF                               | (D) | LGEVVDKLF IGEVDKL     | 510.2971 | 1019.577 |
| LGEVVDKLF                               | (D) | LGEVVDKLF IGEVDKL     | 510.3024 | 1019.577 |

|                                         |     |                     |          |          |
|-----------------------------------------|-----|---------------------|----------|----------|
| LGEVVDKLF                               | (D) | LGEVVDKLF IGEVDKLF  | 510.294  | 1019.577 |
| LGEVVDKLFDLDEKLMLEWIRHGAVQPLDPPQEDSE    | (E) |                     | 1041.006 | 4161.085 |
| LGEVVDKLFDLDEKLMLEWIRHGAVQPLDPPQEDSE    | (E) |                     | 1041.007 | 4161.085 |
| LGEVVDKLFDLDEKLMLEWIRHGAVQPLDPPQEDSE    | (E) |                     | 1041.007 | 4161.085 |
| LGEVVDKLFDLDEKLMLEWIRHGAVQPLDPPQEDSE    | (E) |                     | 1041.006 | 4161.085 |
| LGsNSRPQVIHPPRPPK                       | (V) | LGsNSRPQ`s:Phosphor | 490.7721 | 1880.061 |
| LGsNSRPQVIHPPRPPK                       | (V) | LGsNSRPQ`s:Phosphor | 490.7697 | 1880.061 |
| LGsNSRPQVIHPPRPPK                       | (V) | LGsNSRPQ`s:Phosphor | 654.0185 | 1880.061 |
| LGVNSRSWFsFLGEAYDGARDMWRAYSMDKEANYINAI  | (G) |                     | 1217.583 | 6083.815 |
| LGVSSQGWGTFLEAGQGTKDMWRAYR              | (D) |                     | 1019.832 | 3057.511 |
| LHERKSVLVQAFSVLQALYRCQDQWCSR            | (S) | C:Carbamic          | 580.4779 | 3477.763 |
| LHEVDKTLADDLEKSFPSLK                    | (A) |                     | 762.3973 | 2285.202 |
| LHEVDKTLADDLEKSFPSLK                    | (A) |                     | 762.4081 | 2285.202 |
| LHEVDKTLADDLEKSFPSLK                    | (A) |                     | 762.4039 | 2285.202 |
| LHFALmLLRtEKPWIK                        | (M) | m:Oxidized          | 698.0513 | 1996.157 |
| LHFALmLLRtEKPWIK                        | (M) | m:Oxidized          | 698.0547 | 1996.157 |
| LHFALmLLRtEKPWIK                        | (M) | m:Oxidized          | 698.0521 | 1996.157 |
| LHFALmLLRtEKPWIK                        | (M) | m:Oxidized          | 698.0521 | 1996.157 |
| LHFALmLLRtEKPWIK                        | (M) | m:Oxidized          | 698.0525 | 1996.157 |
| LHFALmLLRtEKPWIK                        | (M) | m:Oxidized          | 698.0526 | 1996.157 |
| LHFALmLLRtEKPWIK                        | (M) | m:Oxidized          | 698.0526 | 1996.157 |
| LHFALmLLRtEKPWIK                        | (M) | m:Oxidized          | 698.0522 | 1996.157 |
| LIHmVSELSEENPEAQVk                      | (L) | m:Oxidized          | 704.3583 | 2053.027 |
| LIQDVA                                  | (L) |                     | 329.6983 | 658.377  |
| LIQDVA                                  | (L) |                     | 329.698  | 658.377  |
| LIQDVA                                  | (L) |                     | 329.6983 | 658.377  |
| LIQDVA                                  | (L) |                     | 329.6978 | 658.377  |
| LIQDVA                                  | (L) |                     | 329.6978 | 658.377  |
| LIQDVA                                  | (L) |                     | 329.6917 | 658.377  |
| LIQDVA                                  | (L) |                     | 329.6978 | 658.377  |
| LIQIVSPEnTkSSSDDEEQQMELDEEMENEICRVWDMSM | (S) | C:Carbamic          | 1214.549 | 7238.28  |
| LIQIVSPENTkSSSDDEEQQMELDEEMENEICRVWDMSM | (S) | C:Carbamic          | 1457.058 | 7238.28  |
| LIQIVSPENTkSSSDDEEQQMELDEEMENEICRVWDMSM | (S) | C:Carbamic          | 1214.389 | 7238.28  |
| LIQIVSPENTkSSSDDEEQQMELDEEMENEICRVWDMSM | (S) | C:Carbamic          | 1214.219 | 7238.28  |
| LISRSR                                  | (V) |                     | 366.2367 | 731.452  |
| LISRSR                                  | (V) |                     | 366.2337 | 731.452  |
| LISRSRV                                 | (Y) |                     | 415.7563 | 830.521  |
| LISRSRVYLQGLIDY                         | (Y) |                     | 599.3298 | 1796.006 |
| LKVLREADESLADELMGNFPSLK                 | (V) |                     | 859.1119 | 2575.344 |
| LKVLREADESLADELMGNFPSLK                 | (V) |                     | 859.1113 | 2575.344 |
| LLADDLEK                                | (D) |                     | 458.7545 | 916.499  |
| LLADDLEK                                | (D) |                     | 458.7525 | 916.499  |
| LLADDLEK                                | (D) |                     | 458.7528 | 916.499  |
| LLADDLEK                                | (D) |                     | 458.7557 | 916.499  |
| LLADDLEK                                | (D) |                     | 458.755  | 916.499  |
| LLADDLEK                                | (D) |                     | 458.7538 | 916.499  |
| LLADDLEkDLPsLk                          | (A) | k:Carbamyl          | 868.4359 | 1569.873 |

|                                           |     |                        |          |          |
|-------------------------------------------|-----|------------------------|----------|----------|
| LLADDEKDLpLk                              | (A) | k:CarbamyI             | 868.4424 | 1569.873 |
| LLADDEKDLpLk                              | (A) | k:CarbamyI             | 868.4374 | 1569.873 |
| LLASILSVLSAMFASETQQEYVNIGKNR              | (A) |                        | 514.6194 | 3082.624 |
| LLASILSVLSAMFASETQQEYVNIGKNR              | (A) |                        | 514.6202 | 3082.624 |
| LLASILSVLSAMFASETQQEYVNIGKNR              | (A) |                        | 514.6201 | 3082.624 |
| LLASILSVLSAMFASETQQEYVNIGKNR              | (A) |                        | 514.617  | 3082.624 |
| LLASILSVLSAMFASETQQEYVNIGKNR              | (A) |                        | 514.6178 | 3082.624 |
| LLASILSVLSAMFASETQQEYVNIGKNR              | (A) |                        | 514.6201 | 3082.624 |
| LLASILSVLSAMFASETQQEYVNIGKNR              | (A) |                        | 514.6201 | 3082.624 |
| LLASILSVLSAMFASETQQEYVNIGKNR              | (A) |                        | 514.6189 | 3082.624 |
| LLEAVK                                    | (Q) |                        | 336.7219 | 672.429  |
| LLFDLVCHEFCQSDPPPIILQEQTVLASAFSVLSAIYASQT | (L) | C:Carbamic             | 1424.539 | 7118.538 |
| LLGRGAEDTLA                               | (D) |                        | 558.3166 | 1115.605 |
| LLGRGAEDTLAD                              | (Q) |                        | 410.8826 | 1230.632 |
| LLGRGAEDTLAD                              | (Q) |                        | 410.8823 | 1230.632 |
| LLGRGAEDTLAD                              | (Q) |                        | 410.8845 | 1230.632 |
| LLGRGAEDTLAD                              | (Q) |                        | 615.8242 | 1230.632 |
| LLGRGAEDTLAD                              | (Q) |                        | 410.8818 | 1230.632 |
| LLGRGAEDTLAD                              | (Q) |                        | 615.8249 | 1230.632 |
| LLGRGAEDTLAD                              | (Q) |                        | 615.8214 | 1230.632 |
| LLIDSLIRVLQNMEQCQK                        | (K) | C:Carbamic             | 734.4024 | 2201.178 |
| LLIDSLIRVLQNMEQCQK                        | (K) | C:Carbamic             | 734.4062 | 2201.178 |
| LLIDSLIRVLQNMEQCQK                        | (K) | C:Carbamic             | 734.4024 | 2201.178 |
| LLIDSLIRVLQNMEQCQK                        | (K) | C:Carbamic             | 734.4001 | 2201.178 |
| LLIGILFCT                                 | (L) | C:Carbamic             | 525.2971 | 1049.606 |
| LLIGILFCT                                 | (L) | C:Carbamic             | 525.3037 | 1049.606 |
| LLLAGLALILIVGTEAVDLnFPIQAIQGGHDMWKAYRDLk  | (K) | LLLAGLALIL n:Deamida   | 1473.796 | 4376.42  |
| LLLAGLALILIVGTEAVDLnFPIQAIQGGHDMWkAYRDLK  | (K) | LLLAGLALIL n:Deamida   | 1473.789 | 4376.42  |
| LLLTCLSHk                                 | (D) | C:Carbamic             | 564.311  | 1084.618 |
| LLLTCLSHk                                 | (D) | C:Carbamic             | 563.8168 | 1084.618 |
| LLLTCLSHk                                 | (D) | C:Carbamic             | 563.8168 | 1084.618 |
| LLLTCLSHk                                 | (D) | C:Carbamic             | 564.311  | 1084.618 |
| LLLTCLSQAEEVAS                            | (V) | C:Carbamic             | 468.9181 | 1404.74  |
| LLLtCLSQAEEVASVWVERIR                     | (E) | LLLtCLSQAIE C:Carbamic | 808.4063 | 2343.285 |
| LLLTCLSQAEEVASVWVERIR                     | (E) | C:Carbamic             | 808.4295 | 2343.285 |
| LLLTCLsQAEEVASVWVERIR                     | (E) | LLLTCLsQAIE C:Carbamic | 808.4063 | 2343.285 |
| LLLTCLsQAEEVASVWVERIR                     | (E) | LLLTCLsQAIE C:Carbamic | 808.4063 | 2343.285 |
| LLLTCLsQAEEVASVWVERIR                     | (E) | LLLTCLsQAIE C:Carbamic | 808.4223 | 2343.285 |
| LLLtCLSQAEEVASVWVERIR                     | (E) | LLLtCLSQAIE C:Carbamic | 808.4068 | 2343.285 |
| LLLTCLsQAEEVASVWVERIR                     | (E) | LLLTCLsQAIE C:Carbamic | 808.4071 | 2343.285 |
| LLLtCLSQAEEVASVWVERIR                     | (E) | C:Carbamic             | 808.4091 | 2343.285 |
| LLLtCLSQK                                 | (D) | LLLtCLSQK C:Carbamic   | 578.2909 | 1075.618 |
| LLLtCLSQK                                 | (D) | LLLtCLSQK C:Carbamic   | 578.2927 | 1075.618 |
| LLLtCLSQK                                 | (D) | LLLtCLSQK C:Carbamic   | 578.2935 | 1075.618 |
| LLLtCLSQK                                 | (D) | LLLtCLSQK C:Carbamic   | 578.2936 | 1075.618 |
| LLLtCLSQK                                 | (D) | LLLtCLSQK C:Carbamic   | 578.2921 | 1075.618 |
| LLLtCLSQK                                 | (D) | LLLtCLSQK C:Carbamic   | 578.2931 | 1075.618 |

|                                   |     |                       |          |          |
|-----------------------------------|-----|-----------------------|----------|----------|
| LLLtCLSQK                         | (D) | LLLtCLSQK C:Carbamic  | 578.2927 | 1075.618 |
| LLLtCLSQK                         | (D) | LLLtCLSQK C:Carbamic  | 578.2927 | 1075.618 |
| LLLtCLSQK                         | (D) | LLLtCLSQK C:Carbamic  | 578.2909 | 1075.618 |
| LLLtCLSQK                         | (D) | LLLtCLSQK C:Carbamic  | 578.2896 | 1075.618 |
| LLLtCLSQK                         | (D) | LLLtCLSQK C:Carbamic  | 578.2901 | 1075.618 |
| LLLtCLSQK                         | (D) | LLLtCLSQK C:Carbamic  | 578.296  | 1075.618 |
| LLLtCLSQK                         | (D) | LLLtCLSQK C:Carbamic  | 578.2899 | 1075.618 |
| LLLtCLSQK                         | (D) | LLLtCLSQK C:Carbamic  | 578.2911 | 1075.618 |
| LLLtCLSQK                         | (D) | LLLtCLSQK C:Carbamic  | 578.299  | 1075.618 |
| LLLtCLSQK                         | (D) | LLLtCLSQK C:Carbamic  | 578.2912 | 1075.618 |
| LLLtCLSQK                         | (D) | LLLtCLSQK C:Carbamic  | 578.2931 | 1075.618 |
| LLLtCLSQK                         | (D) | LLLtCLSQK C:Carbamic  | 578.2918 | 1075.618 |
| LLLtCLSQK                         | (D) | LLLtCLSQK C:Carbamic  | 578.2955 | 1075.618 |
| LLLtCLSQK                         | (D) | LLLtCLSQK C:Carbamic  | 578.2949 | 1075.618 |
| LLLtCLSQK                         | (D) | LLLtCLSQK C:Carbamic  | 578.2888 | 1075.618 |
| LLLtCLSQK                         | (D) | LLLtCLSQK C:Carbamic  | 578.2906 | 1075.618 |
| LLLtCLSQK                         | (D) | LLLtCLSQK C:Carbamic  | 578.294  | 1075.618 |
| LLLtCLSQK                         | (D) | LLLtCLSQK C:Carbamic  | 578.2928 | 1075.618 |
| LLLtCLSQK                         | (D) | LLLtCLSQK C:Carbamic  | 578.2923 | 1075.618 |
| LLLtCLSQK                         | (D) | LLLtCLSQK C:Carbamic  | 578.2924 | 1075.618 |
| LLLtCLSQK                         | (D) | LLLtCLSQK C:Carbamic  | 578.2908 | 1075.618 |
| LLLtCLSQK                         | (D) | LLLtCLSQK C:Carbamic  | 578.294  | 1075.618 |
| LLLtCLSQK                         | (D) | LLLtCLSQK C:Carbamic  | 578.2935 | 1075.618 |
| LLLtCLSQK                         | (D) | LLLtCLSQK C:Carbamic  | 578.2901 | 1075.618 |
| LLLtCLSQK                         | (D) | LLLtCLSQK C:Carbamic  | 578.2935 | 1075.618 |
| LLLtCLSQK                         | (D) | LLLtCLSQK C:Carbamic  | 578.292  | 1075.618 |
| LLLtCLSQK                         | (D) | LLLtCLSQK C:Carbamic  | 578.2933 | 1075.618 |
| LLLtCLSQK                         | (D) | LLLtCLSQK C:Carbamic  | 578.2927 | 1075.618 |
| LLLtCLSQK                         | (D) | LLLtCLSQK C:Carbamic  | 578.2901 | 1075.618 |
| LLLtCLSQK                         | (D) | LLLtCLSQK C:Carbamic  | 578.2901 | 1075.618 |
| LLLtCLSQK                         | (D) | LLLtCLSQK C:Carbamic  | 578.2924 | 1075.618 |
| LLLtCLSQK                         | (D) | LLLtCLSQK C:Carbamic  | 578.2928 | 1075.618 |
| LLLTCLSQk                         | (D) | LLLTCLSQk C:Carbamic  | 559.8062 | 1075.618 |
| LLLtCLSQK                         | (D) | LLLtCLSQK C:Carbamic  | 578.2949 | 1075.618 |
| LLLtCLSQK                         | (D) | LLLtCLSQK C:Carbamic  | 578.2921 | 1075.618 |
| LLLtCLSQK                         | (D) | LLLtCLSQK C:Carbamic  | 578.2931 | 1075.618 |
| LLLtCLSQK                         | (D) | LLLtCLSQK C:Carbamic  | 578.2924 | 1075.618 |
| LLLtCLSQK                         | (D) | LLLtCLSQK C:Carbamic  | 578.2925 | 1075.618 |
| LLLtCLSQK                         | (D) | LLLtCLSQK C:Carbamic  | 578.291  | 1075.618 |
| LLLtCLSQK                         | (D) | LLLtCLSQK C:Carbamic  | 578.293  | 1075.618 |
| LLLtCLSQK                         | (D) | LLLtCLSQK C:Carbamic  | 578.2947 | 1075.618 |
| LLLtCLSQK                         | (D) | LLLtCLSQK C:Carbamic  | 578.2947 | 1075.618 |
| LLLtCLSQK                         | (D) | LLLtCLSQK C:Carbamic  | 578.296  | 1075.618 |
| LLLTCLSQKDVCSLWLQR                | (I) | LLLTCLSQKI C:Carbamic | 579.0426 | 2233.183 |
| LLLTCLSQKDVCSLWLQRIRRQQTSMCSNLCFI | (M) | C:Carbamic            | 795.1967 | 3971.979 |
| LLLTCLSQP                         | (Q) | C:Carbamic            | 522.8002 | 1044.576 |
| LLLTCLSQPQVANIWIERR               | (E) | C:Carbamic            | 808.4478 | 2423.359 |

|                                                |     |                       |          |          |
|------------------------------------------------|-----|-----------------------|----------|----------|
| LLLTCLSQPQVANIWIERIR                           | (E) | C:Carbamic            | 808.4565 | 2423.359 |
| LLLTCLSQPQVANIWIERIR                           | (E) | C:Carbamic            | 808.464  | 2423.359 |
| LLLTCLSQPQVANIWIERIREnPAVYEsICFIMSSSTnVDLLV(V) |     | LLLTCLSQP C:Carbamic  | 868.0951 | 5120.662 |
| LLLTCLSQPQVANVWVER                             | (I) | C:Carbamic            | 532.2875 | 2126.143 |
| LLLTCLSQPQVANVWVER                             | (I) | C:Carbamic            | 532.29   | 2126.143 |
| LLLTCLSQPQVANVWVER                             | (I) | C:Carbamic            | 532.2962 | 2126.143 |
| LLLTCLSQPQVANVWVER                             | (I) | C:Carbamic            | 532.2949 | 2126.143 |
| LLLTCLSQPQVANVWVER                             | (I) | C:Carbamic            | 532.2865 | 2126.143 |
| LLLTCLSQPQVANVWVER                             | (I) | C:Carbamic            | 532.298  | 2126.143 |
| LLLTCLSQPQVANVWVER                             | (I) | C:Carbamic            | 532.2985 | 2126.143 |
| LLLTCLSQPQVANVWVERIRENPAVYDSICFIMSSSTNVDI(D)   |     | C:Carbamic            | 795.4235 | 5561.885 |
| LLLTCLsQTEVANVWVERIREHPAIYDSICFIMSSSTnVDLL(V)  |     | LLLTCLsQTE C:Carbamic | 867.757  | 5120.626 |
| LLLTCLSQTEVASV                                 | (W) | C:Carbamic            | 767.4108 | 1533.819 |
| LLPLYCSVVKDFLK                                 | (V) | C:Carbamic            | 565.6613 | 1694.955 |
| LLSFLGEAAR                                     | (G) |                       | 538.8106 | 1076.61  |
| LLSFLGEAAR                                     | (G) |                       | 538.8135 | 1076.61  |
| LLSFLGEAAR                                     | (G) |                       | 538.8026 | 1076.61  |
| LLSFLGEAAR                                     | (G) |                       | 538.8126 | 1076.61  |
| LLSFLGEAAR                                     | (G) |                       | 538.8133 | 1076.61  |
| LLSFLGEAAR                                     | (G) |                       | 538.8087 | 1076.61  |
| LLSFLGEAAR                                     | (G) |                       | 538.8124 | 1076.61  |
| LLSFLGEAAR                                     | (G) |                       | 538.8081 | 1076.61  |
| LLSFLGEAAR                                     | (G) |                       | 538.8119 | 1076.61  |
| LLSFLGEAAR                                     | (G) |                       | 538.8138 | 1076.61  |
| LLSFLGEAAR                                     | (G) |                       | 538.8106 | 1076.61  |
| LLSFLGEAAR                                     | (G) |                       | 538.8111 | 1076.61  |
| LLSFLGEAAR                                     | (G) |                       | 538.8141 | 1076.61  |
| LLSFLGEAAR                                     | (G) |                       | 538.8098 | 1076.61  |
| LLSFLGEAAR                                     | (G) |                       | 538.7983 | 1076.61  |
| LLSFLGEAAR                                     | (G) |                       | 538.8097 | 1076.61  |
| LLSFLGEAAR                                     | (G) |                       | 538.8022 | 1076.61  |
| LLSFLGEAAR                                     | (G) |                       | 538.8122 | 1076.61  |
| LLSFLGEAAR                                     | (G) |                       | 538.8115 | 1076.61  |
| LLSFLGEAAR                                     | (G) |                       | 538.8123 | 1076.61  |
| LLSFLGEAAR                                     | (G) |                       | 538.8091 | 1076.61  |
| LLSFLGEAAR                                     | (G) |                       | 538.8108 | 1076.61  |
| LLSFLGEAAR                                     | (G) |                       | 538.8097 | 1076.61  |
| LLSFLGEAAR                                     | (G) |                       | 538.8106 | 1076.61  |
| LLSFLGEAAR                                     | (G) |                       | 538.8104 | 1076.61  |
| LLSFLGEAAR                                     | (G) |                       | 538.8088 | 1076.61  |
| LLSFLGEAAR                                     | (G) |                       | 538.8145 | 1076.61  |
| LLSFLGEAAR                                     | (G) |                       | 538.8081 | 1076.61  |
| LLSFLGEAAR                                     | (G) |                       | 538.8112 | 1076.61  |
| LLSFLGEAAR                                     | (G) |                       | 538.8128 | 1076.61  |
| LLSFLGEAAR                                     | (G) |                       | 538.8116 | 1076.61  |
| LLSFLGEAAR                                     | (G) |                       | 538.8089 | 1076.61  |
| LLSFLGEAAR                                     | (G) |                       | 538.8117 | 1076.61  |

|            |     |          |         |
|------------|-----|----------|---------|
| LLSFLGEAAR | (G) | 538.8097 | 1076.61 |
| LLSFLGEAAR | (G) | 538.8112 | 1076.61 |
| LLSFLGEAAR | (G) | 538.8112 | 1076.61 |
| LLSFLGEAAR | (G) | 538.8112 | 1076.61 |
| LLSFLGEAAR | (G) | 538.8113 | 1076.61 |
| LLSFLGEAAR | (G) | 538.8097 | 1076.61 |
| LLSFLGEAAR | (G) | 538.8097 | 1076.61 |
| LLSFLGEAAR | (G) | 538.8121 | 1076.61 |
| LLSFLGEAAR | (G) | 538.8052 | 1076.61 |
| LLSFLGEAAR | (G) | 538.8091 | 1076.61 |
| LLSFLGEAAR | (G) | 538.8113 | 1076.61 |
| LLSFLGEAAR | (G) | 538.8097 | 1076.61 |
| LLSFLGEAAR | (G) | 538.8121 | 1076.61 |
| LLSFLGEAAR | (G) | 538.8128 | 1076.61 |
| LLSFLGEAAR | (G) | 538.8128 | 1076.61 |
| LLSFLGEAAR | (G) | 538.8103 | 1076.61 |
| LLSFLGEAAR | (G) | 538.8099 | 1076.61 |
| LLSFLGEAAR | (G) | 538.8085 | 1076.61 |
| LLSFLGEAAR | (G) | 538.8065 | 1076.61 |
| LLSFLGEAAR | (G) | 538.8097 | 1076.61 |
| LLSFLGEAAR | (G) | 538.8096 | 1076.61 |
| LLSFLGEAAR | (G) | 538.8116 | 1076.61 |
| LLSFLGEAAR | (G) | 538.8114 | 1076.61 |
| LLSFLGEAAR | (G) | 538.8095 | 1076.61 |
| LLSFLGEAAR | (G) | 538.809  | 1076.61 |
| LLSFLGEAAR | (G) | 538.8082 | 1076.61 |
| LLSFLGEAAR | (G) | 538.8097 | 1076.61 |
| LLSFLGEAAR | (G) | 538.8112 | 1076.61 |
| LLSFLGEAAR | (G) | 538.8082 | 1076.61 |
| LLSFLGEAAR | (G) | 538.8088 | 1076.61 |
| LLSFLGEAAR | (G) | 538.81   | 1076.61 |
| LLSFLGEAAR | (G) | 538.8123 | 1076.61 |
| LLSFLGEAAR | (G) | 538.8065 | 1076.61 |
| LLSFLGEAAR | (G) | 538.8112 | 1076.61 |
| LLSFLGEAAR | (G) | 538.8089 | 1076.61 |
| LLSFLGEAAR | (G) | 538.8128 | 1076.61 |
| LLSFLGEAAR | (G) | 538.8106 | 1076.61 |
| LLSFLGEAAR | (G) | 538.808  | 1076.61 |
| LLSFLGEAAR | (G) | 538.8121 | 1076.61 |
| LLSFLGEAAR | (G) | 538.8097 | 1076.61 |
| LLSFLGEAAR | (G) | 538.8097 | 1076.61 |
| LLSFLGEAAR | (G) | 538.8097 | 1076.61 |
| LLSFLGEAAR | (G) | 538.809  | 1076.61 |
| LLSFLGEAAR | (G) | 538.8092 | 1076.61 |
| LLSFLGEAAR | (G) | 538.8123 | 1076.61 |
| LLSFLGEAAR | (G) | 538.8097 | 1076.61 |
| LLSFLGEAAR | (G) | 538.807  | 1076.61 |

|            |     |          |         |
|------------|-----|----------|---------|
| LLSFLGEAAR | (G) | 538.8102 | 1076.61 |
| LLSFLGEAAR | (G) | 538.8085 | 1076.61 |
| LLSFLGEAAR | (G) | 538.8112 | 1076.61 |
| LLSFLGEAAR | (G) | 538.8085 | 1076.61 |
| LLSFLGEAAR | (G) | 538.8121 | 1076.61 |
| LLSFLGEAAR | (G) | 538.8082 | 1076.61 |
| LLSFLGEAAR | (G) | 538.8097 | 1076.61 |
| LLSFLGEAAR | (G) | 538.8065 | 1076.61 |
| LLSFLGEAAR | (G) | 538.8122 | 1076.61 |
| LLSFLGEAAR | (G) | 538.8065 | 1076.61 |
| LLSFLGEAAR | (G) | 538.8065 | 1076.61 |
| LLSFLGEAAR | (G) | 538.8092 | 1076.61 |
| LLSFLGEAAR | (G) | 538.8128 | 1076.61 |
| LLSFLGEAAR | (G) | 538.8065 | 1076.61 |
| LLSFLGEAAR | (G) | 538.8123 | 1076.61 |
| LLSFLGEAAR | (G) | 538.8113 | 1076.61 |
| LLSFLGEAAR | (G) | 538.8128 | 1076.61 |
| LLSFLGEAAR | (G) | 538.8116 | 1076.61 |
| LLSFLGEAAR | (G) | 538.8121 | 1076.61 |
| LLSFLGEAAR | (G) | 538.8061 | 1076.61 |
| LLSFLGEAAR | (G) | 538.8112 | 1076.61 |
| LLSFLGEAAR | (G) | 538.8077 | 1076.61 |
| LLSFLGEAAR | (G) | 538.8065 | 1076.61 |
| LLSFLGEAAR | (G) | 538.8089 | 1076.61 |
| LLSFLGEAAR | (G) | 538.8112 | 1076.61 |
| LLSFLGEAAR | (G) | 538.8121 | 1076.61 |
| LLSFLGEAAR | (G) | 538.8114 | 1076.61 |
| LLSFLGEAAR | (G) | 538.8052 | 1076.61 |
| LLSFLGEAAR | (G) | 538.8122 | 1076.61 |
| LLSFLGEAAR | (G) | 538.8128 | 1076.61 |
| LLSFLGEAAR | (G) | 538.8088 | 1076.61 |
| LLSFLGEAAR | (G) | 538.8096 | 1076.61 |
| LLSFLGEAAR | (G) | 538.8097 | 1076.61 |
| LLSFLGEAAR | (G) | 538.8082 | 1076.61 |
| LLSFLGEAAR | (G) | 538.8128 | 1076.61 |
| LLSFLGEAAR | (G) | 538.81   | 1076.61 |
| LLSFLGEAAR | (G) | 538.8106 | 1076.61 |
| LLSFLGEAAR | (G) | 538.8121 | 1076.61 |
| LLSFLGEAAR | (G) | 538.8139 | 1076.61 |
| LLSFLGEAAR | (G) | 538.8128 | 1076.61 |
| LLSFLGEAAR | (G) | 538.809  | 1076.61 |
| LLSFLGEAAR | (G) | 538.8103 | 1076.61 |
| LLSFLGEAAR | (G) | 538.8097 | 1076.61 |
| LLSFLGEAAR | (G) | 538.8052 | 1076.61 |
| LLSFLGEAAR | (G) | 538.8112 | 1076.61 |
| LLSFLGEAAR | (G) | 538.81   | 1076.61 |
| LLSFLGEAAR | (G) | 538.8121 | 1076.61 |



|            |     |          |         |
|------------|-----|----------|---------|
| LLSFLGEAAR | (G) | 538.8092 | 1076.61 |
| LLSFLGEAAR | (G) | 538.8114 | 1076.61 |
| LLSFLGEAAR | (G) | 538.8095 | 1076.61 |
| LLSFLGEAAR | (G) | 538.8112 | 1076.61 |
| LLSFLGEAAR | (G) | 538.8112 | 1076.61 |
| LLSFLGEAAR | (G) | 538.8085 | 1076.61 |
| LLSFLGEAAR | (G) | 538.8065 | 1076.61 |
| LLSFLGEAAR | (G) | 538.8112 | 1076.61 |
| LLSFLGEAAR | (G) | 538.8094 | 1076.61 |
| LLSFLGEAAR | (G) | 538.8113 | 1076.61 |
| LLSFLGEAAR | (G) | 538.8097 | 1076.61 |
| LLSFLGEAAR | (G) | 538.8121 | 1076.61 |
| LLSFLGEAAR | (G) | 538.8097 | 1076.61 |
| LLSFLGEAAR | (G) | 538.8052 | 1076.61 |
| LLSFLGEAAR | (G) | 538.809  | 1076.61 |
| LLSFLGEAAR | (G) | 538.8112 | 1076.61 |
| LLSFLGEAAR | (G) | 538.8112 | 1076.61 |
| LLSFLGEAAR | (G) | 538.809  | 1076.61 |
| LLSFLGEAAR | (G) | 538.8088 | 1076.61 |
| LLSFLGEAAR | (G) | 538.8106 | 1076.61 |
| LLSFLGEAAR | (G) | 538.8112 | 1076.61 |
| LLSFLGEAAR | (G) | 538.8128 | 1076.61 |
| LLSFLGEAAR | (G) | 538.8121 | 1076.61 |
| LLSFLGEAAR | (G) | 538.8065 | 1076.61 |
| LLSFLGEAAR | (G) | 538.8082 | 1076.61 |
| LLSFLGEAAR | (G) | 538.8112 | 1076.61 |
| LLSFLGEAAR | (G) | 538.8121 | 1076.61 |
| LLSFLGEAAR | (G) | 538.8085 | 1076.61 |
| LLSFLGEAAR | (G) | 538.8109 | 1076.61 |
| LLSFLGEAAR | (G) | 538.8141 | 1076.61 |
| LLSFLGEAAR | (G) | 538.8085 | 1076.61 |
| LLSFLGEAAR | (G) | 538.8112 | 1076.61 |
| LLSFLGEAAR | (G) | 538.8052 | 1076.61 |
| LLSFLGEAAR | (G) | 538.8089 | 1076.61 |
| LLSFLGEAAR | (G) | 538.8097 | 1076.61 |
| LLSFLGEAAR | (G) | 538.8101 | 1076.61 |
| LLSFLGEAAR | (G) | 538.8123 | 1076.61 |
| LLSFLGEAAR | (G) | 538.8112 | 1076.61 |
| LLSFLGEAAR | (G) | 538.8109 | 1076.61 |
| LLSFLGEAAR | (G) | 538.808  | 1076.61 |
| LLSFLGEAAR | (G) | 538.8128 | 1076.61 |
| LLSFLGEAAR | (G) | 538.8065 | 1076.61 |
| LLSFLGEAAR | (G) | 538.8069 | 1076.61 |
| LLSFLGEAAR | (G) | 538.8089 | 1076.61 |
| LLSFLGEAAR | (G) | 538.8085 | 1076.61 |
| LLSFLGEAAR | (G) | 538.8112 | 1076.61 |
| LLSFLGEAAR | (G) | 538.8097 | 1076.61 |

|                                          |     |                       |          |          |
|------------------------------------------|-----|-----------------------|----------|----------|
| LLSFLGEAAR                               | (G) |                       | 538.8065 | 1076.61  |
| LLSFLGEAAR                               | (G) |                       | 538.8112 | 1076.61  |
| LLSFLGEAAR                               | (G) |                       | 538.8085 | 1076.61  |
| LLSFLGEAAR                               | (G) |                       | 538.8097 | 1076.61  |
| LLSFLGEAAR                               | (G) |                       | 538.8112 | 1076.61  |
| LLSFLGEAAR                               | (G) |                       | 538.8112 | 1076.61  |
| LLSFLGEAAR                               | (G) |                       | 538.8097 | 1076.61  |
| LLSFLGEAAR                               | (G) |                       | 538.8065 | 1076.61  |
| LLSFLGEAAR                               | (G) |                       | 538.8126 | 1076.61  |
| LLSFLGEAAR                               | (G) |                       | 538.8096 | 1076.61  |
| LLSFLGEAAR                               | (G) |                       | 538.8123 | 1076.61  |
| LLSFLGEAAR                               | (G) |                       | 538.8112 | 1076.61  |
| LLSFLGEAAR                               | (G) |                       | 538.8022 | 1076.61  |
| LLSFLGEAAR                               | (G) |                       | 538.8097 | 1076.61  |
| LLSFLGEAAR                               | (G) |                       | 538.8097 | 1076.61  |
| LLSFLGEAAR                               | (G) |                       | 538.8128 | 1076.61  |
| LLSFLGEAARG                              | (T) |                       | 567.3111 | 1133.631 |
| LLSFLGEAARG                              | (T) |                       | 567.316  | 1133.631 |
| LLSFLGEAARG                              | (T) |                       | 567.3129 | 1133.631 |
| LLSFLGEAARG                              | (T) |                       | 567.3129 | 1133.631 |
| LLSFLGEAARG                              | (T) |                       | 567.3222 | 1133.631 |
| LLSFLGEAARG                              | (T) |                       | 567.308  | 1133.631 |
| LLSFLGEAARG                              | (T) |                       | 567.3177 | 1133.631 |
| LLSFLGEAARG                              | (T) |                       | 567.3222 | 1133.631 |
| LLSFLGEAARG                              | (T) |                       | 567.308  | 1133.631 |
| LLSFLGEAARG                              | (T) |                       | 567.308  | 1133.631 |
| LLSFLGEAARGTWMIR                         | (A) |                       | 646.0105 | 1936.011 |
| LLSFLGEAARGTWMIR                         | (A) |                       | 646.0123 | 1936.011 |
| LLSTCLSHSEVATTWVERV                      | (Q) | C:Carbamic            | 730.0308 | 2188.107 |
| LLTGLVFC                                 | (S) | C:Carbamic            | 461.7584 | 922.507  |
| LLTGLVFC                                 | (S) | C:Carbamic            | 461.7529 | 922.507  |
| LLTGLVFC                                 | (S) | C:Carbamic            | 461.7515 | 922.507  |
| LLTGLVFCSLVLGVNSRSWFS                    | (F) | C:Carbamic            | 785.7519 | 2355.253 |
| LLTGLVFCSLVLGVNSRSWFSFLGEAYDGARD         | (M) | C:Carbamic            | 888.1946 | 3549.784 |
| LLTGLVFCSLVLGVNSRSWFSFLGEAYDGARD         | (M) | C:Carbamic            | 888.1942 | 3549.784 |
| LLTGLVFCSLVLGVNSRSWFSFLGEAYDGARD         | (M) | C:Carbamic            | 888.1921 | 3549.784 |
| LLTGLVFCSLVLGVNSRSWFSFLGEAYDGARD         | (M) | C:Carbamic            | 888.1899 | 3549.784 |
| LLTGLVFCSLVLGVSSr                        | (S) | LLTGLVFC C:Carbamic   | 634.3255 | 1821.03  |
| LLVAVVLAAVAAG                            | (T) |                       | 633.4221 | 1265.819 |
| LLVAVVLAAVAAGTEGAPGFWDITKPFSSFAKEAVQGA   | (N) | k:Acetyl              | 814.687  | 5654.845 |
| LLVGILLCSLVLGSSQS                        | (W) | C:Carbamic            | 620.0167 | 1858.072 |
| LLVGILLCSLVLGSSQS                        | (W) | C:Carbamic            | 620.0167 | 1858.072 |
| LLVGILLCSLVLGvsSQSWWTFLEAGQGtR           | (D) | LLVGILLCSL C:Carbamic | 895.4649 | 3418.856 |
| LLVVLHERKSILVQAFSVLQALYRCQDQWCSR         | (S) | C:Carbamic            | 653.5262 | 3916.084 |
| LLWSKTVD                                 | (M) |                       | 481.2714 | 961.535  |
| LMEICVGILGNMACFQEICVSISNDkNIGQTLHCLYDLDP | (L) | C:Carbamic            | 965.2963 | 5663.775 |
| LmEICVGILGNmACFQELCVSISNDKNIGR           | (T) | C:Carbamic            | 695.5275 | 3441.646 |

|                                            |     |            |            |          |          |
|--------------------------------------------|-----|------------|------------|----------|----------|
| LmLDWIRSGAAAPLDQPQEDSEEQPVFKIVPCVLEAAK     | (Q) | C:Carbamic | 871.0543   | 4251.146 |          |
| LmLEWIKNGAVQPLDPPQEDSEEQPVFKIVPCVLEAAK     | (Q) | C:Carbamic | 876.2478   | 4318.214 |          |
| LmLEWIKNGAVQPLDPPQEDSEEQPVFKIVPCVLEAAK     | (Q) | C:Carbamic | 876.2662   | 4318.214 |          |
| LmLEWIKNGAVQPLDPPQEDSEEQPVFKIVPCVLEAAK     | (Q) | C:Carbamic | 876.2623   | 4318.214 |          |
| LmLEWIKnGAVQPLDPPQEDSEEQPVFKIVPCVLEAAK     | (Q) | C:Carbamic | 876.4595   | 4318.214 |          |
| LMLEWIKnGAVQPLDPPQEDSEEQPVFKIVPCVLEAAK     | (Q) | C:Carbamic | 1080.561   | 4318.214 |          |
| LmLEWIKNGAVQPLDPPQEDSEEQPVFKIVPCVLEAAK     | (Q) | C:Carbamic | 876.2608   | 4318.214 |          |
| LmLEWIKNGAVQPLDPPQEDSEEQPVFKIVPCVLEAAK     | (Q) | C:Carbamic | 876.2576   | 4318.214 |          |
| LmLEWIKNGAVQPLDPPQEDSEEQPVFKIVPCVLEAAK     | (Q) | C:Carbamic | 876.2653   | 4318.214 |          |
| LmLEWIKNGAVQPLDPPQEDSEEQPVFKIVPCVLEAAK     | (Q) | C:Carbamic | 876.25     | 4318.214 |          |
| LmLEWIRHGAVQPLDPPQEDSEEQPVFK               | (I) | m:Oxidized | 837.4256   | 3288.636 |          |
| LmLEWIRHGAVQPLDPPQEDSEEQPVFK               | (I) | m:Oxidized | 837.4213   | 3288.636 |          |
| LMLEWIRHGAVQPLDPPQEDsEEQPVFKIVPCVLEAAK     | (Q) | C:Carbamic | 1134.577   | 4369.236 |          |
| LMLEWIRIGAVQALDQPQEDsEQQPVFRIVPCVLEAAK     | (Q) | C:Carbamic | 743.7187   | 4377.273 |          |
| LMLEWIRnAPAQPVDQAQENSEEQPAFR               | (I) | n:Deamida  | 817.9106   | 3267.585 |          |
| LPGLKRSSHFSLLNNWDCR                        | (C) | C:Carbamic | 575.7894   | 2300.172 |          |
| LPLCSALRRGAESPLR                           | (A) | C:Carbamic | 599.3344   | 1795.996 |          |
| LQEKTVLASVFSVLCAIYASQTEQEYLKIEK            | (V) | C:Carbamic | 744.1854   | 3716.945 |          |
| LQGGSSGRGVEDSMADQEANRWGRSGKDPNRYRPKGL      | (-) |            | 756.691    | 4535.198 |          |
| LQGGSSGRGVEDSMADQEANRWGRSGKDPNRYRPKGL      | (-) |            | 756.7109   | 4535.198 |          |
| LQGWGLEVV                                  | (F) |            | 500.7725   | 1000.546 |          |
| LQGWGLEVVFLSFK                             | (N) |            | 811.9393   | 1622.894 |          |
| LQGWGLEVVFLSFK                             | (N) |            | 541.6331   | 1622.894 |          |
| LQGWGLEVVFLSFK                             | (N) |            | 541.6268   | 1622.894 |          |
| LQGWGLEVVFLSFK                             | (N) |            | 541.6295   | 1622.894 |          |
| LQGWGLEVVFLSFK                             | (N) |            | 541.6276   | 1622.894 |          |
| LRDVTVFLFTLCPFGRVLSFPGTWDMLRAYNDMREANYI    | (G) | C:Carbamic | 955.8196   | 5729.84  |          |
| LREAGQGAKDMWRAYRDMKEANYKGADKYFHARGNY       | (G) |            | 1202.849   | 4808.307 |          |
| LREICVGILGnMACFQEICVsISNDKnLGEVLLHCLYDSDPF | (L) | LREICVGILC | C:Carbamic | 819.6828 | 5649.752 |
| LREICVGILGNmACFR                           | (E) | C:Carbamic | 642.3276   | 1908.96  |          |
| LREICVGILGNmACFR                           | (E) | C:Carbamic | 642.3259   | 1908.96  |          |
| LREICVGILGNMACFR                           | (E) | C:Carbamic | 637.0014   | 1908.96  |          |
| LREICVGILGNmACFR                           | (E) | C:Carbamic | 642.3252   | 1908.96  |          |
| LREICVGILGNmACFR                           | (E) | C:Carbamic | 642.3244   | 1908.96  |          |
| LREICVGILGNMtCFQEICVSISSDKnLGEVLLHCLYDsDPP | (I) | LREICVGILC | C:Carbamic | 818.9672 | 5565.72  |
| LREICVGILGNMtCFQEICVSISSDKnLGEVLLHCLYDsDPP | (I) | LREICVGILC | C:Carbamic | 818.9655 | 5565.72  |
| LREICVGILGnMtCFQEICVSISSDKnLGEVLLHCLYDsDPP | (I) | LREICVGILC | C:Carbamic | 818.9668 | 5565.72  |
| LREICVGILGnmTCFQEICVSISSDKnLGEVLLHCLYDsDPP | (I) | LREICVGILC | C:Carbamic | 809.8246 | 5565.72  |
| LREICVGILGNMtCFQEICVSISSDKnLGEVLLHCLYDsDPP | (I) | LREICVGILC | C:Carbamic | 818.9632 | 5565.72  |
| LREICVGILGnMtCFQEICVSISSDKnLGEVLLHCLYDsDPP | (I) | LREICVGILC | C:Carbamic | 818.9686 | 5565.72  |
| LRTAGGAVGGVPPGAPGALALGCPSSPPQLPARPS        | (S) | C:Carbamic | 647.552    | 3233.721 |          |
| LSACGFKGNWIIQK                             | (P) | C:Carbamic | 578.9827   | 1734.936 |          |
| LSEADPNLAEVTR                              | (T) |            | 472.2519   | 1414.717 |          |
| LSEADPNLAEVTR                              | (T) |            | 472.2475   | 1414.717 |          |
| LSFLGEAAR                                  | (G) |            | 482.2741   | 963.526  |          |
| LSFLGEAAR                                  | (G) |            | 482.2698   | 963.526  |          |
| LSFLGEAAR                                  | (G) |            | 482.2573   | 963.526  |          |

|                                                  |     |                        |          |          |
|--------------------------------------------------|-----|------------------------|----------|----------|
| LSFLGEAAR                                        | (G) |                        | 482.2573 | 963.526  |
| LSFLGEAAR                                        | (G) |                        | 482.2687 | 963.526  |
| LSFLGEAAR                                        | (G) |                        | 482.2579 | 963.526  |
| LSFLGEAAR                                        | (G) |                        | 482.2579 | 963.526  |
| LSFLGEAAR                                        | (G) |                        | 482.2573 | 963.526  |
| LSIGIIFCFLILGVnsREWLTfLK                         | (E) | C:Carbamic             | 584.9036 | 2839.594 |
| LSIGIIFCFLILGVnsREWLTFLK                         | (E) | C:Carbamic             | 584.9124 | 2839.594 |
| LSIGIIFCFLILGVnsREWLTFLkEAGQGAK                  | (D) | C:Carbamic             | 721.373  | 3480.908 |
| LSIGIIFCSL                                       | (V) | C:Carbamic             | 561.8099 | 1122.623 |
| LSIGIIFCSL                                       | (V) | C:Carbamic             | 561.8079 | 1122.623 |
| LSIGIIFCSL                                       | (V) | C:Carbamic             | 561.8117 | 1122.623 |
| LSIGIIFCSL                                       | (V) | C:Carbamic             | 561.8097 | 1122.623 |
| LSKQKCSCAFQNLFPYNPVVEDFIKILHEVDKAVASDL EE (-)    |     | C:Carbamic             | 826.8635 | 5781.955 |
| LSQSEVASVWVERIREHPAIYDSMCFIMSSSTNVDLLVKV (L)     |     | C:Carbamic             | 1217.591 | 6084.044 |
| LSQTEVANVWVER                                    | (I) |                        | 510.9378 | 1530.791 |
| LSQTEVASVWVER                                    | (I) |                        | 501.9277 | 1503.78  |
| LStGIIFCFLILGVsSQR                               | (W) | LStGIIFCFLI C:Carbamic | 724.3606 | 2011.104 |
| LStGIIFCSLVLGVSQGWLTFLKAAGQGtKDMWK               | (A) | LStGIIFCSL\ C:Carbamic | 654.6785 | 3799.991 |
| LTCLSQKDVCSLWLQRIRQQTSLCSNL CFIMSSSTR            | (T) | C:Carbamic             | 626.1774 | 4377.139 |
| LTCLSQKDVCSLWLQRIRQQTSLCSNL CFIMSSSTR            | (T) | C:Carbamic             | 876.249  | 4377.139 |
| LTCLSQKDVCSLWLQRIRQQTSLCSNL CFIMSSSTR            | (T) | C:Carbamic             | 626.1774 | 4377.139 |
| LTCLSQKDVCSLWLQRIRQQTSLCSNL CFIMSSSTR            | (T) | C:Carbamic             | 730.3767 | 4377.139 |
| LTCLSQKDVCSLWLQRIRQQTSLCSNL CFIMSSSTR            | (T) | C:Carbamic             | 876.2434 | 4377.139 |
| LTEICVGILGNIA                                    | (C) | C:Carbamic             | 686.8725 | 1372.751 |
| LTEICVGILGNIA                                    | (C) | C:Carbamic             | 686.8725 | 1372.751 |
| LTEICVGILGNIA                                    | (C) | C:Carbamic             | 686.8708 | 1372.751 |
| LTEICVGILGNIA                                    | (C) | C:Carbamic             | 686.8708 | 1372.751 |
| LTEICVGILGNIA                                    | (C) | C:Carbamic             | 686.8703 | 1372.751 |
| LtEICVGILGnmACFQDICmSISkDES LGQVLLQRLCDS DSf (L) |     | C:Carbamic             | 819.397  | 5573.676 |
| LTEICVGILGnmACFQDICMSISkDES LGQVLLQRLC DS (L)    |     | LTEICVGIL C:Carbamic   | 1418.437 | 5573.676 |
| LTEICVGILGnmACFQDICmSISkDES LGQVLLQRLC DS (L)    |     | LTEICVGIL C:Carbamic   | 819.2539 | 5573.676 |
| LTKVEDFLK                                        | (I) |                        | 546.8168 | 1092.63  |
| LTKVEDFLK                                        | (I) |                        | 546.8162 | 1092.63  |
| LTKVEDFLK                                        | (I) |                        | 546.8162 | 1092.63  |
| LTKVEDFLK                                        | (I) |                        | 546.8205 | 1092.63  |
| LTKVEDFLK                                        | (I) |                        | 546.8119 | 1092.63  |
| LTKVEDFLK                                        | (I) |                        | 546.821  | 1092.63  |
| LTKVEDFLK                                        | (I) |                        | 546.8202 | 1092.63  |
| LTKVEDFLK                                        | (I) |                        | 546.8218 | 1092.63  |
| LTKVEDFLK                                        | (I) |                        | 546.8213 | 1092.63  |
| LTKVEDFLK                                        | (I) |                        | 546.8172 | 1092.63  |
| LTKVEDFLK                                        | (I) |                        | 546.8184 | 1092.63  |
| LVAVVVLAAVAAGTEGAPGFWDTITKPF SFAK                | (E) |                        | 809.1879 | 3233.761 |
| LVAVVVLAAVAAGTEGAPGFWDTITKPF SFAK                | (E) |                        | 809.1856 | 3233.761 |
| LVAVVVLAAVAAGTEGAPGFWDTITKPF SFAK                | (E) |                        | 809.1895 | 3233.761 |
| LVAVVVLAAVAAGTEGAPGFWDTITKPF SFAK                | (E) |                        | 647.5512 | 3233.761 |
| LVAVVVLAAVAAGTEGAPGFWDTITKPF SFAK                | (E) |                        | 647.5516 | 3233.761 |

|                                         |     |                        |          |          |
|-----------------------------------------|-----|------------------------|----------|----------|
| LVAVVVLAAVAAGTEGAPGFWDTITKPFSAK         | (E) |                        | 809.185  | 3233.761 |
| LVDKLFDLDEELMK                          | (T) |                        | 569.9596 | 1707.887 |
| LVDNLEK                                 | (D) |                        | 415.7351 | 830.462  |
| LVLGVDSQRWFQFMK                         | (E) |                        | 618.6556 | 1853.973 |
| LVLGVHSWFSFIGEAFGGAR                    | (D) |                        | 717.3799 | 2150.118 |
| LVLGVHSWFSFIGEAFGGAR                    | (D) |                        | 717.3841 | 2150.118 |
| LVLGVHSWFSFIGEAFGGAR                    | (D) |                        | 717.385  | 2150.118 |
| LVLGVHSWFSFIGEAFGGAR                    | (D) |                        | 717.3905 | 2150.118 |
| LVLGVHSWFSFIGEAFGGAR                    | (D) |                        | 717.3897 | 2150.118 |
| LVLGVHSWFSFIGEAFGGAR                    | (D) |                        | 717.3777 | 2150.118 |
| LVLGVHSWFSFIGEAFGGAR                    | (D) |                        | 717.3892 | 2150.118 |
| LVLGVHSWFSFIGEAFGGAR                    | (D) |                        | 717.3768 | 2150.118 |
| LVLGVHSWFSFIGEAFGGAR                    | (D) |                        | 717.3841 | 2150.118 |
| LVLGVHSWFSFIGEAFGGAR                    | (D) |                        | 717.3633 | 2150.118 |
| LVLGVHSWFSFIGEAFGGAR                    | (D) |                        | 717.3859 | 2150.118 |
| LVLGVHSWFSFIGEAFGGAR                    | (D) |                        | 717.3854 | 2150.118 |
| LVLGVHSWFSFIGEAFGGAR                    | (D) |                        | 717.3892 | 2150.118 |
| LVLGVHSWFSFIGEAFGGAR                    | (D) |                        | 717.3825 | 2150.118 |
| LVLGVHSWFSFIGEAFGGAR                    | (D) |                        | 717.3837 | 2150.118 |
| LVLGVHSWFSFIGEAFGGAR                    | (D) |                        | 717.3841 | 2150.118 |
| LVLGVHSWFSFIGEAFGGAR                    | (D) |                        | 717.3854 | 2150.118 |
| LVLGVSSREWFTFLK                         | (E) |                        | 594.6581 | 1781.995 |
| LVLGVSSREWFTFLK                         | (E) |                        | 594.6581 | 1781.995 |
| LVPLHCPDTGKDIWNLLFDLVCHEFC              | (Q) | C:Carbamic             | 800.3711 | 3198.521 |
| LYCSVVKDFLKVLEADKALVDNLEKDFPSLK         | (A) | C:Carbamic             | 623.1802 | 3733.987 |
| LYPTHACREYLkNLPLLSk                     | (Y) | C:Carbamic             | 813.4302 | 2316.253 |
| MDRNPSPPPPGRDKEEEEVAGGDCIGSTVYSKHWLFG\  | (V) | C:Carbamic             | 981.2087 | 6862.29  |
| MDRNPSPPPPGRDQEEEEVAGGDCIGStVYSK        | (H) | C:Carbamic             | 909.3761 | 3474.554 |
| MDRNPSPPPPGRDQEEEEVAGGDCIGStVYSK        | (H) | C:Carbamic             | 909.3746 | 3474.554 |
| MDRNPSPPPPGRDQEEEEVAGGDCIGSTVYsK        | (H) | MDRNPSP C:Carbamic     | 909.3686 | 3474.554 |
| MEEGKYHSNLPLIDSLI                       | (R) |                        | 653.6753 | 1958.989 |
| MEGFFSFVHEAFQGAGDMWRAYTDMKEANWKKSDKY    | (N) |                        | 697.4759 | 4876.228 |
| mEKNLPLIGSLIRVLHNMEDCQQR                | (S) | C:Carbamic             | 984.8293 | 2894.48  |
| mEKNLPLIGSLIRVLHNMEDCQQR                | (S) | C:Carbamic             | 984.8289 | 2894.48  |
| mENGCTIDLPLIGtLIRVLQnMEHCEkR            | (S) | C:Carbamic             | 870.9092 | 3340.663 |
| MKLFTGLILCSLVLGVHSQWMSFLGEAYEGAKDMWRA   | (Y) | C:Carbamic             | 1062.035 | 4245.116 |
| MKLFTGLILCSLVLGVHSQWWSFFGEAYEGAK        | (D) | MkLFTGLIL C:Carbamic   | 744.3856 | 3674.854 |
| MKLFTGLILCSLVLGVHSQWWSFFGEAYEGAK        | (D) | MkLFTGLIL C:Carbamic   | 760.1834 | 3674.854 |
| MKLLLAGIVLIFMAGsEAQWYnYPVQAAQGAGDMWRA   | (K) | MkLLLAGIV k:Acetyl,s:F | 694.9132 | 4735.333 |
| MKLLLAGIVLIFMAGsEAQWYnYPVQAAQGAGDMWRA   | (K) | MkLLLAGIV k:Acetyl,s:F | 694.9133 | 4735.333 |
| MKLLLAGIVLIFMAGsEAQWYNYPVQAAQGAGDMWRA   | (K) | MkLLLAGIV k:Carbamyl   | 694.9033 | 4735.333 |
| MKLLAVLVMFMVVEAQAQWYRFPGEAAGG           | (A) |                        | 1109.236 | 3325.73  |
| mKLLTGLVFCSLVLGVHSWFSFIGEAFGGARDMWR     | (A) | mKLLTGLV C:Carbamic    | 668.1707 | 3988.022 |
| MKLLTGLVFCSLVLGVSSRSFFSFLGEAFDG         | (A) | C:Carbamic             | 677.7627 | 3384.737 |
| MKLLTSLVFCSLLLGVCHGGFFSFIGEAFQGAGDMWRAY | (E) | C:Carbamic             | 697.6222 | 4861.347 |
| MKLLVAVVVLAAVAAGtEGAPGFWDTItKPFSAK      | (E) | MKLLVAVV t:Phosphor    | 753.9845 | 3605.98  |
| MKLLVAVVVLAAVAAGtEGAPGFWDTItKPFSAK      | (E) | MKLLVAVV t:Phosphor    | 753.9842 | 3605.98  |

|                                          |     |                       |          |          |
|------------------------------------------|-----|-----------------------|----------|----------|
| MKLLVAVVVLAAVAAGTEGAPGFWDtItKPFSFAK      | (E) | t:Phosphor            | 753.9836 | 3605.98  |
| MKLLVAVVVLAAVAAGtEGAPGFWDtItKPFSFAK      | (E) | MKLLVAVV t:Phosphor   | 753.9874 | 3605.98  |
| MKLLVAVVVLAAVAAGtEGAPGFWDtItKPFSFAK      | (E) | MKLLVAVV t:Phosphor   | 753.9864 | 3605.98  |
| MKLSTGIIFCSLVLGVsSQGWLTFLkAAGQGTK        | (D) | MKLSTGIIF C:Carbamic  | 725.1918 | 3498.885 |
| mKPFLAIIFCFLILGVDSQRWFQFMkEAGQGsR        | (D) | C:Carbamic            | 812.6041 | 3921.017 |
| mNLSTGIIFCFLILGVSSQGWGtFLKEAGQGAKDMWK    | (A) | C:Carbamic            | 1410.362 | 4091.059 |
| MNLSTGIIFCFLILGVSSQGWGtFLRE              | (A) | C:Carbamic            | 1016.207 | 3046.553 |
| mNLsTGIIFCFLILGVSSQGWGtFLREAGQGAKDMWR    | (A) | mNLsTGIIF C:Carbamic  | 1429.002 | 4147.071 |
| MRSLGVFLNGH                              | (F) |                       | 615.8235 | 1230.641 |
| MTCRDSRAPDQLFSSP                         | (L) | C:Carbamic            | 655.6438 | 1964.895 |
| MTCRDSRAPDQLFSSP                         | (L) | C:Carbamic            | 655.6454 | 1964.895 |
| mWkAyQDMREAnYK                           | (G) | m:Oxidized            | 987.392  | 1833.841 |
| NFPSLKVQ                                 | (T) |                       | 466.7548 | 932.52   |
| NGAVQPLDPPQ                              | (E) |                       | 568.2999 | 1135.574 |
| NGAVQPLDPPQ                              | (E) |                       | 568.295  | 1135.574 |
| NGDAQPLDQSAGDAEPPVfK                     | (I) | k:Carbamyl            | 1114.527 | 2185.004 |
| NKEEEEVAGGDCIGSTVySkHWLFGVLSGLIQIVSPEnTk | (S) | NKEEEEVA C:Carbamic   | 1140.302 | 4391.186 |
| nKEEEEVAGGDCIGSTVYskHWLFGVLSGLIQIVSPEStk | (S) | nKEEEEVA C:Carbamic   | 755.7086 | 4364.176 |
| NKGYLTEK                                 | (T) | k:Acetyl              | 497.7629 | 952.51   |
| NKGYLTEKCLAAASCLHHK                      | (F) | C:Carbamic            | 1172.582 | 2302.143 |
| NLGKsLYIRER                              | (E) | s:Phosphor            | 714.8718 | 1348.77  |
| NLGKsLYIRER                              | (E) | s:Phosphor            | 714.8721 | 1348.77  |
| NLGKsLYIRER                              | (E) | s:Phosphor            | 714.8704 | 1348.77  |
| nLLPFYsPVIEdFLKILHEVDkTLADDLEESFPSLK     | (V) | nLLPFYsPVI n:Deamida  | 1075.546 | 4175.184 |
| nLLPFYSPVIEdFLKILHEVDkTLADDLEESFPSLK     | (V) | nLLPFYSPV n:Deamida   | 1075.543 | 4175.184 |
| NLLPLYCSVVKDFLK                          | (V) | C:Carbamic            | 905.0083 | 1808.998 |
| NLLPLYCSVVKDFLK                          | (V) | C:Carbamic            | 905.0124 | 1808.998 |
| NLLPLYCSVVKDFLK                          | (V) | C:Carbamic            | 905.0104 | 1808.998 |
| NLLPLYCSVVKDFLK                          | (V) | C:Carbamic            | 905.0124 | 1808.998 |
| NLLPLYCSVVKDFLK                          | (V) | C:Carbamic            | 905.013  | 1808.998 |
| NLLPLYCSVVKDFLK                          | (V) | NLLPLYCSV C:Carbamic  | 617.9961 | 1808.998 |
| NLLPLYCSVVKDFLK                          | (V) | C:Carbamic            | 905.0128 | 1808.998 |
| NLLPLYCSVVKDFLK                          | (V) | NLLPLYCSV C:Carbamic  | 617.9941 | 1808.998 |
| NLLPLYITEVEtFLk                          | (V) | NLLPLYITEV t:Phosphor | 958.511  | 1793.009 |
| NLLPLYITEVEtFLk                          | (V) | NLLPLYITEV t:Phosphor | 958.4879 | 1793.009 |
| NLPLIGsLIR                               | (V) | s:Phosphor            | 588.3335 | 1095.688 |
| NLPLLSKYCGYREDNIP                        | (Q) | C:Carbamic            | 684.6778 | 2052.022 |
| nmPLIGsLIRILQYmEGCGKR                    | (S) | C:Carbamic            | 854.7421 | 2449.288 |
| nmPLIGsLIRILQYmEGCGKR                    | (S) | nmPLIGsLIF C:Carbamic | 854.7436 | 2449.288 |
| nmPLIGsLIRILQYmEGCGKR                    | (S) | C:Carbamic            | 854.7418 | 2449.288 |
| nmPLIGsLIRILQYmEGCGKR                    | (S) | C:Carbamic            | 854.7429 | 2449.288 |
| nmPLIGsLIRILQYmEGCGKR                    | (S) | C:Carbamic            | 854.7402 | 2449.288 |
| nmPLIGsLIRILQYmEGCGKR                    | (S) | C:Carbamic            | 854.7426 | 2449.288 |
| nmPLIGsLIRILQYmEGCGKR                    | (S) | C:Carbamic            | 854.7401 | 2449.288 |
| nmPLIGsLIRILQYmEGCGKR                    | (S) | nmPLIGsLIF C:Carbamic | 854.7436 | 2449.288 |
| nmPLIGsLIRILQYmEGCGKR                    | (S) | C:Carbamic            | 854.7437 | 2449.288 |
| nmPLIGsLIRILQYmEGCGKR                    | (S) | nmPLIGsLIF C:Carbamic | 854.7318 | 2449.288 |

|                                         |     |                       |          |          |
|-----------------------------------------|-----|-----------------------|----------|----------|
| nmPLIGsLIRILQYmEGCGKR                   | (S) | nmPLIGsLIF C:Carbamic | 854.7457 | 2449.288 |
| NPSPPPEEGDQEAEDADAIGDTVYskHWLFLSTLR     | (L) | k:Carbamyl            | 795.3803 | 3929.81  |
| NPSPPSPGRDKEEEEVAGGDCIGSTVYskHWLFGVLSGL | (I) | C:Carbamic            | 835.2138 | 4172.003 |
| NPSPPWRGSEAEAEAEAAAGGDAIGA              | (T) |                       | 804.021  | 2410.091 |
| NQsVYDHICFImSSSTNVELLVkvGEVVDK          | (L) | C:Carbamic            | 888.1697 | 3410.697 |
| NQsVYDHICFImSSSTNVELLVkvGEVVDK          | (L) | NQsVYDHIC:Carbamic    | 888.1825 | 3410.697 |
| NQSVYDHICFImSSSTNVELLVkvGEVVDK          | (L) | NQSVYDHIC:Carbamic    | 702.1271 | 3410.697 |
| NVEEQLTELDEEMENEICKVWDMMSMDKDVALFLYEFNA | (T) | C:Carbamic            | 818.9475 | 5726.64  |
| NVEEQLTELDEEMENEICKVWDMMSMDKDVALFLYEFNA | (T) | C:Carbamic            | 818.9672 | 5726.64  |
| PAGLPDK                                 | (Y) |                       | 349.2013 | 697.388  |
| PAGLPDK                                 | (Y) |                       | 349.1909 | 697.388  |
| PAGLPDK                                 | (Y) |                       | 349.1925 | 697.388  |
| PAGLPDK                                 | (Y) |                       | 349.1982 | 697.388  |
| PAGLPDK                                 | (Y) |                       | 349.1972 | 697.388  |
| PAGLPDK                                 | (Y) |                       | 349.1981 | 697.388  |
| PAGLPDK                                 | (Y) |                       | 349.1925 | 697.388  |
| PAGLPDK                                 | (Y) |                       | 349.1925 | 697.388  |
| PAGLPDKY                                | (-) |                       | 430.7301 | 860.451  |
| PAGLPDKY                                | (-) |                       | 430.7295 | 860.451  |
| PAGLPDKY                                | (-) |                       | 430.731  | 860.451  |
| PAGLPDKY                                | (-) |                       | 430.7272 | 860.451  |
| PAGLPDKY                                | (-) |                       | 430.7304 | 860.451  |
| PAGLPDKY                                | (-) |                       | 430.7313 | 860.451  |
| PAGLPDKY                                | (-) |                       | 430.7328 | 860.451  |
| PAGLPDKY                                | (-) |                       | 430.7307 | 860.451  |
| PAGLPDKY                                | (-) |                       | 430.7359 | 860.451  |
| PAGLPDKY                                | (-) |                       | 430.7335 | 860.451  |
| PAGLPDKY                                | (-) |                       | 430.7329 | 860.451  |
| PGDTWAAKVISDAREK                        | (S) |                       | 581.9751 | 1743.902 |
| PGGAWAAK                                | (V) |                       | 379.2047 | 757.399  |
| PGGAWAAK                                | (V) |                       | 379.2065 | 757.399  |
| PGGAWAAK                                | (V) |                       | 379.208  | 757.399  |
| PGGAWAAK                                | (V) |                       | 379.2071 | 757.399  |
| PGGAWAAK                                | (V) |                       | 379.2071 | 757.399  |
| PGGAWAAK                                | (V) |                       | 379.2069 | 757.399  |
| PGGAWAAK                                | (V) |                       | 379.2071 | 757.399  |
| PHGLPDK                                 | (Y) |                       | 255.1418 | 763.41   |
| PHGLPDK                                 | (Y) |                       | 382.208  | 763.41   |
| PHGLPDK                                 | (Y) |                       | 255.1437 | 763.41   |
| PHGLPDK                                 | (Y) |                       | 255.1449 | 763.41   |
| PHGLPDK                                 | (Y) |                       | 382.2101 | 763.41   |
| PHGLPDK                                 | (Y) |                       | 382.2011 | 763.41   |
| PHGLPDKY                                | (-) |                       | 463.7399 | 926.473  |
| PHGLPDKY                                | (-) |                       | 463.7399 | 926.473  |
| PHGLPDKY                                | (-) |                       | 463.7418 | 926.473  |
| PHGLPDKY                                | (-) |                       | 463.7411 | 926.473  |
| PHGLPDKY                                | (-) |                       | 463.7424 | 926.473  |

|                                          |     |                      |          |          |
|------------------------------------------|-----|----------------------|----------|----------|
| PHGLPDKY                                 | (-) |                      | 309.4967 | 926.473  |
| PHGLPDKY                                 | (-) |                      | 309.4963 | 926.473  |
| PHGLPDKY                                 | (-) |                      | 463.7415 | 926.473  |
| PHGLPDKY                                 | (-) |                      | 309.4956 | 926.473  |
| PHGLPDKY                                 | (-) |                      | 463.7421 | 926.473  |
| PHGLPDKY                                 | (-) |                      | 463.7415 | 926.473  |
| PHGLPDKY                                 | (-) |                      | 309.4959 | 926.473  |
| PHGLPDKY                                 | (-) |                      | 309.4966 | 926.473  |
| PHGLPDKY                                 | (-) |                      | 463.7431 | 926.473  |
| PHGLPDKY                                 | (-) |                      | 463.7397 | 926.473  |
| PHGLPDKY                                 | (-) |                      | 463.7411 | 926.473  |
| PHGLPDKY                                 | (-) |                      | 309.4958 | 926.473  |
| PHGLPDKY                                 | (-) |                      | 309.4965 | 926.473  |
| PHGLPDKY                                 | (-) |                      | 309.4965 | 926.473  |
| PHGLPDKY                                 | (-) |                      | 463.743  | 926.473  |
| PHGLPDKY                                 | (-) |                      | 309.4968 | 926.473  |
| PHGLPDKY                                 | (-) |                      | 309.4979 | 926.473  |
| PNHFRPHGLPDKY                            | (-) |                      | 395.2096 | 1577.797 |
| PNHFRPHGLPDKY                            | (-) |                      | 526.6046 | 1577.797 |
| PPGAPGALALGCRSSPPQLPARPSSAERGK           | (V) | C:Carbamic           | 597.3098 | 2982.569 |
| PPGAPGALALGCRSSPPQLPARPSSAERGK           | (V) | C:Carbamic           | 597.3118 | 2982.569 |
| PQEDSEEQPVFKIVPCVLEAAKQVR                | (S) | C:Carbamic           | 966.162  | 2896.487 |
| PQEDSEEQPVFKIVPCVLEAAKQVR                | (S) | C:Carbamic           | 966.1644 | 2896.487 |
| PQEDSEEQPVFKIVPCVLEAAKQVR                | (S) | C:Carbamic           | 966.1676 | 2896.487 |
| PQEDSEEQPVFKIVPCVLEAAKQVR                | (S) | C:Carbamic           | 966.1562 | 2896.487 |
| QKCFCAFKNLLPL                            | (Y) | C:Carbamic           | 819.9214 | 1638.85  |
| QKCFCAFKNLLPL                            | (Y) | C:Carbamic           | 819.9266 | 1638.85  |
| qkCSCAFKNLLPLYCSVVK                      | (D) | C:Carbamic           | 781.069  | 2315.171 |
| QkCsCAFkNLLPLYITEVETFLK                  | (V) | C:Carbamic           | 989.5051 | 2802.457 |
| qkCSCAFQnLLPFYnPVVEDFIKILHEVDK           | (A) | C:Carbamic           | 930.9657 | 3651.834 |
| QKCSAFQnLLPFYSPmVEDFLKILYEVDK            | (T) | QKCSAFQ C:Carbamic   | 1274.912 | 3682.799 |
| qkCSSAFQnLLPFYSPVISLRImFQR               | (M) | C:Carbamic           | 793.6653 | 3130.633 |
| qkCSSAFQnLLPFYSPVISLRImFQR               | (M) | qkCSSAFQr C:Carbamic | 814.134  | 3130.633 |
| QKCSAFQnLLPFYSPVVEDFIK                   | (I) | C:Carbamic           | 680.108  | 2717.364 |
| qKCSsAFQnLLPFYSPVVEDFIKILHEVDK           | (A) | qKCSsAFQn C:Carbamic | 1219.618 | 3551.824 |
| qKCsSAFQnLLPFYSPVVEDFIKILHEVDK           | (A) | qKCsSAFQn C:Carbamic | 1219.617 | 3551.824 |
| QLRSENPEGLDVYmHILQLLTTVDDGIQAIVQCPDTGK   | (D) | C:Carbamic           | 1071.537 | 4267.137 |
| QLRSESPNGVEIYLHILQLLTTIEE                | (G) |                      | 965.8467 | 2895.546 |
| QQTSMCSNLCFIMSSSTKTDLLEKVGELVDKFLDLDEELM | (S) | C:Carbamic           | 963.0831 | 4811.296 |
| QVRSEnLEGLDVYmHILQLLTTVDDGmKAIVQCPNTGK   | (D) | C:Carbamic           | 1076.561 | 4286.162 |
| QVRSEnLEGLDVYmHILQLLTTVDDGMKAIVQCPNTGK   | (D) | QVRSEnLEC C:Carbamic | 1076.546 | 4286.162 |
| QVRSEnLEGLDVYmHILQLLTTVDDGMKAIVQCPNTGK   | (D) | QVRSEnLEC C:Carbamic | 1076.561 | 4286.162 |
| QVRSEnLEGLDVYmHILQLLTTVDDGmKAIVQCPNTGK   | (D) | C:Carbamic           | 1076.546 | 4286.162 |
| REANYIGADKYFHARGNYDAAKR                  | (G) |                      | 672.3321 | 2686.323 |
| REANYIGADKYFHARGNYDAAKR                  | (G) |                      | 672.3332 | 2686.323 |
| REANYIGADKYFHARGNYDAAKR                  | (G) |                      | 672.3308 | 2686.323 |
| REANYIGADKYFHARGNYDAAKR                  | (G) |                      | 672.3336 | 2686.323 |



|                                            |     |                       |          |          |
|--------------------------------------------|-----|-----------------------|----------|----------|
| REANYIGADKYFHARGNYDAAKR                    | (G) |                       | 672.3325 | 2686.323 |
| REANYIGADKYFHARGNYDAAKR                    | (G) |                       | 672.3347 | 2686.323 |
| REANYIGADKYFHARGNYDAAKR                    | (G) |                       | 672.332  | 2686.323 |
| REANYIGADKYFHARGNYDAAKR                    | (G) |                       | 672.3326 | 2686.323 |
| REANYIGADKYFHARGNYDAAKR                    | (G) |                       | 672.3329 | 2686.323 |
| REANYIGADKYFHARGNYDAAKR                    | (G) |                       | 672.334  | 2686.323 |
| REANYIGADKYFHARGNYDAAKR                    | (G) |                       | 672.331  | 2686.323 |
| REANYIGADKYFHARGNYDAAKR                    | (G) |                       | 672.3331 | 2686.323 |
| REANYIGADKYFHARGNYDAAKR                    | (G) |                       | 672.3342 | 2686.323 |
| REANYIGADKYFHARGNYDAAKR                    | (G) | REANYIGADKYFHARGN     | 672.336  | 2686.323 |
| RGNYDAAKRGP GGAWAAKVISDAR                  | (E) |                       | 829.7742 | 2487.296 |
| RGPGGAWAAK                                 | (V) |                       | 324.1795 | 970.522  |
| RGPGGAWAAK                                 | (V) |                       | 324.1799 | 970.522  |
| RGPGGAWAAK                                 | (V) |                       | 324.1785 | 970.522  |
| RGPGGAWAAK                                 | (V) |                       | 324.1774 | 970.522  |
| RGPGGAWAAK                                 | (V) |                       | 324.179  | 970.522  |
| RGPGGAWAAK                                 | (V) |                       | 485.7665 | 970.522  |
| RGPGGAWAAK                                 | (V) |                       | 485.7622 | 970.522  |
| RGPGGAWAAK                                 | (V) |                       | 324.1815 | 970.522  |
| RGPGGAWAAK                                 | (V) |                       | 485.7651 | 970.522  |
| RGPGGAWAAK                                 | (V) |                       | 324.1805 | 970.522  |
| RGPGGAWAAK                                 | (V) |                       | 485.7673 | 970.522  |
| RGPGGAWAAK                                 | (V) |                       | 485.7669 | 970.522  |
| RGPGGAWAAK                                 | (V) |                       | 324.1786 | 970.522  |
| RGPGGAWAAK                                 | (V) |                       | 485.7677 | 970.522  |
| RGPGGAWAAK                                 | (V) |                       | 324.1819 | 970.522  |
| RGPGGAWAAK                                 | (V) |                       | 324.1792 | 970.522  |
| RGPGGAWAAK                                 | (V) |                       | 485.7689 | 970.522  |
| RGPGGAWAAK                                 | (V) |                       | 485.7659 | 970.522  |
| RGPGGAWAAK                                 | (V) |                       | 485.7662 | 970.522  |
| RGPGGAWAAK                                 | (V) |                       | 485.7647 | 970.522  |
| RGPGGAWAAK                                 | (V) |                       | 324.1734 | 970.522  |
| RGPGGAWAAK                                 | (V) |                       | 485.7552 | 970.522  |
| RGPGGAWAAK                                 | (V) |                       | 485.7694 | 970.522  |
| RGPGGAWAAK                                 | (V) |                       | 485.769  | 970.522  |
| RNsEFEIFVDCDInR                            | (E) | RNsEFEIFVI C:Carbamic | 665.616  | 1913.881 |
| RVLQNMEQCQKKPENSTESNTGETKK                 | (T) | C:Carbamic            | 1022.179 | 3064.479 |
| RYFYAQGNYDAAERGP GGVWA                     | (A) |                       | 1174.569 | 2348.084 |
| RYFYAQGNYDAAERGP GGVWA                     | (A) |                       | 1174.554 | 2348.084 |
| SAFSVLSSIYASQAEQEDVRVGK                    | (E) |                       | 824.4176 | 2471.241 |
| SDARENSQRVTDFFRHGNSGHGAEDSKADQEANEWGR      | (Y) |                       | 992.7872 | 5951.724 |
| SDLTQDDFHLKILKDISCEFLSNIFQVLTKETVAQGVK     | (E) | C:Carbamic            | 730.8763 | 4380.28  |
| SDMREANYIGADK                              | (Y) |                       | 490.5681 | 1469.669 |
| SDSIVPLIGNVLRVCQYHRECKHEATSKGGAEDGQLETLA   | (V) | C:Carbamic            | 925.6082 | 6473.17  |
| SENLEGLDVYmHILQLLTTVDDGMk                  | (A) | m:Oxidized            | 724.098  | 2834.395 |
| SENLEGLDVYmHILQLLTTVDDGMk                  | (A) | m:Oxidized            | 724.1004 | 2834.395 |
| SENPEWLDVYM HILQLLTTVDDGIQAIVDLPLIDSLIRVLQ | (K) | C:Carbamic            | 955.9819 | 5606.858 |

|                                               |     |                      |          |          |
|-----------------------------------------------|-----|----------------------|----------|----------|
| SEnPEWLDVYMHIQLLTTVDDGIQAIVDLPLIDSLIRVLQI (K) |     | C:Carbamic           | 956.1261 | 5606.858 |
| sEnPEWLDVYMHIQLLTTVDDGIQAIVDLPLIDSLIRVLQI (K) |     | sEnPEWLD' C:Carbamic | 955.9734 | 5606.858 |
| sEnPEWLDVYMHIQLLTTVDDGIQAIVDLPLIDSLIRVLQI (K) |     | sEnPEWLD' C:Carbamic | 955.9733 | 5606.858 |
| SEVtEDDFHlTVLkDVSCeLLSnVFQDLTK                | (E) | SEVtEDDFH C:Carbamic | 721.9481 | 3481.704 |
| SFLGEAAR                                      | (G) |                      | 425.7314 | 850.442  |
| SFLGEAAR                                      | (G) |                      | 425.726  | 850.442  |
| SFLGEAAR                                      | (G) |                      | 425.7248 | 850.442  |
| SFLGEAAR                                      | (G) |                      | 425.7237 | 850.442  |
| SFLGEAAR                                      | (G) |                      | 425.726  | 850.442  |
| SFLGEAAR                                      | (G) |                      | 425.7314 | 850.442  |
| SFLGEAAR                                      | (G) |                      | 425.7287 | 850.442  |
| SFLGEAAR                                      | (G) |                      | 425.7257 | 850.442  |
| SFLGEAAR                                      | (G) |                      | 425.7299 | 850.442  |
| SFPSLKVQ                                      | (T) |                      | 453.2512 | 905.509  |
| SGFIQIVSPENTK                                 | (S) |                      | 473.9167 | 1419.748 |
| SGKDPNHFR                                     | (P) |                      | 353.1787 | 1057.517 |
| SGKDPNHFR                                     | (P) |                      | 265.136  | 1057.517 |
| SGKDPNHFR                                     | (P) |                      | 353.1792 | 1057.517 |
| SGKDPNHFR                                     | (P) |                      | 265.1361 | 1057.517 |
| SGKDPNHFR                                     | (P) |                      | 265.137  | 1057.517 |
| SGKDPNHFR                                     | (P) |                      | 265.1368 | 1057.517 |
| SGKDPNHFR                                     | (P) |                      | 353.1777 | 1057.517 |
| SGKDPNHFR                                     | (P) |                      | 529.2725 | 1057.517 |
| SGKDPNHFR                                     | (P) |                      | 529.2632 | 1057.517 |
| SGKDPNHFR                                     | (P) |                      | 353.1791 | 1057.517 |
| SGKDPNHFR                                     | (P) |                      | 529.2656 | 1057.517 |
| SGKDPNHFR                                     | (P) |                      | 265.138  | 1057.517 |
| SGKDPNHFRPAGLPDK                              | (Y) |                      | 579.3049 | 1735.887 |
| SGKDPNHFRPAGLPDK                              | (Y) |                      | 579.3028 | 1735.887 |
| SGKDPNHFRPAGLPDK                              | (Y) |                      | 579.3012 | 1735.887 |
| SGKDPnHFRPAGLPDK                              | (Y) | n:Deamida            | 434.9762 | 1735.887 |
| SGKDPNHFRPAGLPDK                              | (Y) |                      | 434.7296 | 1735.887 |
| SGKDPNHFRPAGLPDK                              | (Y) |                      | 579.2938 | 1735.887 |
| SGKDPNHFRPAGLPDK                              | (Y) |                      | 579.3012 | 1735.887 |
| SGKDPNHFRPAGLPDK                              | (Y) |                      | 579.2938 | 1735.887 |
| SGKDPNHFRPAGLPDK                              | (Y) |                      | 579.3007 | 1735.887 |
| SGKDPNHFRPAGLPDK                              | (Y) |                      | 434.7321 | 1735.887 |
| SGKDPnHFRPAGLPDK                              | (Y) | n:Deamida            | 434.9814 | 1735.887 |
| SGKDPNHFRPAGLPDK                              | (Y) |                      | 868.4482 | 1735.887 |
| SGKDPnHFRPAGLPDK                              | (Y) | n:Deamida            | 434.981  | 1735.887 |
| SGKDPNHFRPAGLPDK                              | (Y) |                      | 434.7285 | 1735.887 |
| SGKDPNHFRPAGLPDK                              | (Y) |                      | 347.9864 | 1735.887 |
| SGKDPNHFRPAGLPDK                              | (Y) |                      | 347.9836 | 1735.887 |
| SGKDPNHFRPAGLPDK                              | (Y) |                      | 868.4488 | 1735.887 |
| SGKDPnHFRPAGLPDK                              | (Y) | n:Deamida            | 434.9817 | 1735.887 |
| SGKDPNHFRPAGLPDK                              | (Y) |                      | 434.7278 | 1735.887 |
| SGKDPnHFRPAGLPDK                              | (Y) | n:Deamida            | 434.9762 | 1735.887 |

|                   |     |           |          |          |
|-------------------|-----|-----------|----------|----------|
| SGKDPNHFRPAGLPDKY | (-) |           | 633.6591 | 1898.951 |
| SGKDPNHFRPAGLPDKY | (-) |           | 475.4959 | 1898.951 |
| SGKDPNHFRPAGLPDKY | (-) |           | 475.4949 | 1898.951 |
| SGKDPNHFRPAGLPDKY | (-) |           | 633.6582 | 1898.951 |
| SGKDPnHFRPAGLPDKY | (-) | n:Deamida | 475.745  | 1898.951 |
| SGKDPNHFRPAGLPDKY | (-) |           | 380.5988 | 1898.951 |
| SGKDPNHFRPAGLPDKY | (-) |           | 380.5991 | 1898.951 |
| SGKDPnHFRPAGLPDKY | (-) | n:Deamida | 633.9862 | 1898.951 |
| SGKDPNHFRPAGLPDKY | (-) |           | 949.9853 | 1898.951 |
| SGKDPNHFRPAGLPDKY | (-) |           | 633.6576 | 1898.951 |
| SGKDPNHFRPAGLPDKY | (-) |           | 633.6582 | 1898.951 |
| SGKDPNHFRPAGLPDKY | (-) |           | 633.6582 | 1898.951 |
| SGKDPNHFRPAGLPDKY | (-) |           | 475.4962 | 1898.951 |
| SGKDPNHFRPAGLPDKY | (-) |           | 475.4966 | 1898.951 |
| SGKDPNHFRPAGLPDKY | (-) |           | 633.6591 | 1898.951 |
| SGKDPNHFRPAGLPDKY | (-) |           | 380.5986 | 1898.951 |
| SGKDPnHFRPAGLPDKY | (-) | n:Deamida | 475.7429 | 1898.951 |
| SGKDPnHFRPAGLPDKY | (-) | n:Deamida | 950.4774 | 1898.951 |
| SGKDPNHFRPAGLPDKY | (-) |           | 633.6574 | 1898.951 |
| SGKDPNHFRPAGLPDKY | (-) |           | 475.4968 | 1898.951 |
| SGKDPNHFRPAGLPDKY | (-) |           | 949.9809 | 1898.951 |
| SGKDPNHFRPAGLPDKY | (-) |           | 949.9853 | 1898.951 |
| SGKDPNHFRPAGLPDKY | (-) |           | 949.9851 | 1898.951 |
| SGKDPNHFRPAGLPDKY | (-) |           | 949.9851 | 1898.951 |
| SGKDPNHFRPAGLPDKY | (-) |           | 380.5981 | 1898.951 |
| SGKDPnHFRPAGLPDKY | (-) | n:Deamida | 633.9867 | 1898.951 |
| SGKDPNHFRPAGLPDKY | (-) |           | 949.9841 | 1898.951 |
| SGKDPNHFRPAGLPDKY | (-) |           | 475.4959 | 1898.951 |
| SGKDPNHFRPAGLPDKY | (-) |           | 949.9842 | 1898.951 |
| SGKDPNHFRPAGLPDKY | (-) |           | 949.9797 | 1898.951 |
| SGKDPNHFRPAGLPDKY | (-) |           | 949.9809 | 1898.951 |
| SGKDPNHFRPAGLPDKY | (-) |           | 949.9809 | 1898.951 |
| SGKDPNHFRPAGLPDKY | (-) |           | 380.5991 | 1898.951 |
| SGKDPNHFRPAGLPDKY | (-) |           | 475.4953 | 1898.951 |
| SGKDPNHFRPAGLPDKY | (-) |           | 380.5986 | 1898.951 |
| SGKDPnHFRPAGLPDKY | (-) | n:Deamida | 950.4758 | 1898.951 |
| SGKDPNHFRPAGLPDKY | (-) |           | 633.6592 | 1898.951 |
| SGKDPNHFRPAGLPDKY | (-) |           | 475.4937 | 1898.951 |
| SGKDPnHFRPAGLPDKY | (-) | n:Deamida | 950.4666 | 1898.951 |
| SGKDPNHFRPH       | (G) |           | 431.2157 | 1291.629 |
| SGKDPNHFRPH       | (G) |           | 431.216  | 1291.629 |
| SGKDPNHFRPH       | (G) |           | 431.2158 | 1291.629 |
| SGKDPNHFRPH       | (G) |           | 431.2151 | 1291.629 |
| SGKDPNHFRPH       | (G) |           | 431.2146 | 1291.629 |
| SGKDPNHFRPH       | (G) |           | 431.2144 | 1291.629 |
| SGKDPNHFRPH       | (G) |           | 431.2144 | 1291.629 |
| SGKDPNHFRPH       | (G) |           | 431.2167 | 1291.629 |

|                   |     |           |          |          |
|-------------------|-----|-----------|----------|----------|
| SGKDPNHFRPH       | (G) |           | 431.2146 | 1291.629 |
| SGKDPNHFRPH       | (G) |           | 431.2163 | 1291.629 |
| SGKDPNHFRPH       | (G) |           | 431.2212 | 1291.629 |
| SGKDPNHFRPH       | (G) |           | 323.6645 | 1291.629 |
| SGKDPNHFRPH       | (G) |           | 323.6645 | 1291.629 |
| SGKDPNHFRPH       | (G) |           | 431.2201 | 1291.629 |
| SGKDPNHFRPHG      | (L) |           | 337.919  | 1348.65  |
| SGKDPNHFRPHGLPDK  | (Y) |           | 451.2369 | 1801.909 |
| SGKDPNHFRPHGLPDK  | (Y) |           | 451.2363 | 1801.909 |
| SGKDPNHFRPHGLPDK  | (Y) |           | 601.3146 | 1801.909 |
| SGKDPNHFRPHGLPDK  | (Y) |           | 601.3146 | 1801.909 |
| SGKDPNHFRPHGLPDK  | (Y) |           | 451.236  | 1801.909 |
| SGKDPNHFRPHGLPDK  | (Y) |           | 361.1905 | 1801.909 |
| SGKDPNHFRPHGLPDK  | (Y) |           | 451.236  | 1801.909 |
| SGKDPNHFRPHGLPDK  | (Y) |           | 451.2345 | 1801.909 |
| SGKDPnHFRPHGLPDK  | (Y) | n:Deamida | 451.4822 | 1801.909 |
| SGKDPnHFRPHGLPDK  | (Y) | n:Deamida | 451.4866 | 1801.909 |
| SGKDPNHFRPHGLPDK  | (Y) |           | 901.4645 | 1801.909 |
| SGKDPNHFRPHGLPDK  | (Y) |           | 601.3194 | 1801.909 |
| SGKDPNHFRPHGLPDK  | (Y) |           | 361.1921 | 1801.909 |
| SGKDPNHFRPHGLPDK  | (Y) |           | 361.1865 | 1801.909 |
| SGKDPNHFRPHGLPDK  | (Y) |           | 451.236  | 1801.909 |
| SGKDPNHFRPHGLPDK  | (Y) |           | 601.3108 | 1801.909 |
| SGKDPNHFRPHGLPDK  | (Y) |           | 601.3194 | 1801.909 |
| SGKDPNHFRPHGLPDK  | (Y) |           | 601.3194 | 1801.909 |
| SGKDPnHFRPHGLPDK  | (Y) | n:Deamida | 451.4808 | 1801.909 |
| SGKDPnHFRPHGLPDK  | (Y) | n:Deamida | 361.3861 | 1801.909 |
| SGKDPNHFRPHGLPDKY | (-) |           | 655.6642 | 1964.973 |
| SGKDPnHFRPHGLPDKY | (-) | n:Deamida | 655.9943 | 1964.973 |
| SGKDPNHFRPHGLPDKY | (-) |           | 655.6659 | 1964.973 |
| SGKDPNHFRPHGLPDKY | (-) |           | 655.6665 | 1964.973 |
| SGKDPnHFRPHGLPDKY | (-) | n:Deamida | 655.9921 | 1964.973 |
| SGKDPNHFRPHGLPDKY | (-) |           | 655.6667 | 1964.973 |
| SGKDPNHFRPHGLPDKY | (-) |           | 655.6643 | 1964.973 |
| SGKDPNHFRPHGLPDKY | (-) |           | 393.8017 | 1964.973 |
| SGKDPNHFRPHGLPDKY | (-) |           | 655.6644 | 1964.973 |
| SGKDPNHFRPHGLPDKY | (-) |           | 655.6645 | 1964.973 |
| SGKDPNHFRPHGLPDKY | (-) |           | 982.9959 | 1964.973 |
| SGKDPnHFRPHGLPDKY | (-) | n:Deamida | 492.2477 | 1964.973 |
| SGKDPNHFRPHGLPDKY | (-) |           | 655.665  | 1964.973 |
| SGKDPnHFRPHGLPDKY | (-) | n:Deamida | 655.9884 | 1964.973 |
| SGKDPNHFRPHGLPDKY | (-) |           | 655.6642 | 1964.973 |
| SGKDPnHFRPHGLPDKY | (-) | n:Deamida | 655.9993 | 1964.973 |
| SGKDPNHFRPHGLPDKY | (-) |           | 655.6665 | 1964.973 |
| SGKDPnHFRPHGLPDKY | (-) | n:Deamida | 655.9926 | 1964.973 |
| SGKDPNHFRPHGLPDKY | (-) |           | 491.9999 | 1964.973 |
| SGKDPNHFRPHGLPDKY | (-) |           | 492.0017 | 1964.973 |

|                   |     |           |          |          |
|-------------------|-----|-----------|----------|----------|
| SGKDPNHFRPHGLPDKY | (-) |           | 492.0007 | 1964.973 |
| SGKDPNHFRPHGLPDKY | (-) |           | 655.6642 | 1964.973 |
| SGKDPNHFRPHGLPDKY | (-) |           | 492.0008 | 1964.973 |
| SGKDPNHFRPHGLPDKY | (-) |           | 393.8036 | 1964.973 |
| SGKDPnHFRPHGLPDKY | (-) | n:Deamida | 655.9965 | 1964.973 |
| SGKDPnHFRPHGLPDKY | (-) | n:Deamida | 983.4878 | 1964.973 |
| SGKDPnHFRPHGLPDKY | (-) | n:Deamida | 492.2534 | 1964.973 |
| SGKDPNHFRPHGLPDKY | (-) |           | 492.0026 | 1964.973 |
| SGKDPNHFRPHGLPDKY | (-) |           | 982.996  | 1964.973 |
| SGKDPNHFRPHGLPDKY | (-) |           | 393.8022 | 1964.973 |
| SGKDPnHFRPHGLPDKY | (-) | n:Deamida | 655.9921 | 1964.973 |
| SGKDPNHFRPHGLPDKY | (-) |           | 393.8053 | 1964.973 |
| SGKDPNHFRPHGLPDKY | (-) |           | 492.0018 | 1964.973 |
| SGKDPNHFRPHGLPDKY | (-) |           | 982.991  | 1964.973 |
| SGKDPNHFRPHGLPDKY | (-) |           | 655.6643 | 1964.973 |
| SGKDPNHFRPHGLPDKY | (-) |           | 982.9959 | 1964.973 |
| SGKDPNHFRPHGLPDKY | (-) |           | 492.0006 | 1964.973 |
| SGKDPnHFRPHGLPDKY | (-) | n:Deamida | 492.2478 | 1964.973 |
| SGKDPnHFRPHGLPDKY | (-) | n:Deamida | 983.4829 | 1964.973 |
| SGKDPNHFRPHGLPDKY | (-) |           | 393.8023 | 1964.973 |
| SGKDPnHFRPHGLPDKY | (-) | n:Deamida | 492.2483 | 1964.973 |
| SGKDPNHFRPHGLPDKY | (-) |           | 393.8005 | 1964.973 |
| SGKDPNHFRPHGLPDKY | (-) |           | 491.9999 | 1964.973 |
| SGKDPNHFRPHGLPDKY | (-) |           | 982.991  | 1964.973 |
| SGKDPNHFRPHGLPDKY | (-) |           | 393.8029 | 1964.973 |
| SGKDPNHFRPHGLPDKY | (-) |           | 492.0008 | 1964.973 |
| SGKDPNHFRPHGLPDKY | (-) |           | 491.9999 | 1964.973 |
| SGKDPnHFRPHGLPDKY | (-) | n:Deamida | 492.2485 | 1964.973 |
| SGKDPnHFRPHGLPDKY | (-) | n:Deamida | 492.2527 | 1964.973 |
| SGKDPNHFRPHGLPDKY | (-) |           | 655.6642 | 1964.973 |
| SGKDPNHFRPHGLPDKY | (-) |           | 982.99   | 1964.973 |
| SGKDPnHFRPHGLPDKY | (-) | n:Deamida | 655.9884 | 1964.973 |
| SGKDPNHFRPHGLPDKY | (-) |           | 393.8012 | 1964.973 |
| SGKDPnHFRPHGLPDKY | (-) | n:Deamida | 492.2496 | 1964.973 |
| SGKDPnHFRPHGLPDKY | (-) | n:Deamida | 492.2483 | 1964.973 |
| SGKDPNHFRPHGLPDKY | (-) |           | 393.8022 | 1964.973 |
| SGKDPNHFRPHGLPDKY | (-) |           | 655.6645 | 1964.973 |
| SGKDPNHFRPHGLPDKY | (-) |           | 655.6665 | 1964.973 |
| SGKDPNHFRPHGLPDKY | (-) |           | 492.0006 | 1964.973 |
| SGKDPNHFRPHGLPDKY | (-) |           | 492.0006 | 1964.973 |
| SGKDPNHFRPHGLPDKY | (-) |           | 492.0017 | 1964.973 |
| SGKDPNHFRPHGLPDKY | (-) |           | 492.0007 | 1964.973 |
| SGKDPNHFRPHGLPDKY | (-) |           | 655.6643 | 1964.973 |
| SGKDPnHFRPHGLPDKY | (-) | n:Deamida | 655.993  | 1964.973 |
| SGKDPNHFRPHGLPDKY | (-) |           | 393.8053 | 1964.973 |
| SGKDPNHFRPHGLPDKY | (-) |           | 655.665  | 1964.973 |
| SGKDPNHFRPHGLPDKY | (-) |           | 982.9911 | 1964.973 |

|                   |     |            |          |          |
|-------------------|-----|------------|----------|----------|
| SGKDPnHFRPHGLPDKY | (-) | n:Deamida  | 655.9921 | 1964.973 |
| SGKDPNHFRPHGLPDKY | (-) |            | 655.6659 | 1964.973 |
| SGKDPNHFRPHGLPDKY | (-) |            | 982.991  | 1964.973 |
| SGKDPNHFRPHGLPDKY | (-) |            | 982.9944 | 1964.973 |
| SGKDPNHFRPHGLPDKY | (-) |            | 393.8012 | 1964.973 |
| SGKDPNHFRPHGLPDKY | (-) |            | 982.9959 | 1964.973 |
| SGKDPNHFRPHGLPDKY | (-) |            | 393.801  | 1964.973 |
| SGKDPNHFRPHGLPDKY | (-) |            | 393.8042 | 1964.973 |
| SGKDPNHFRPHGLPDKY | (-) |            | 655.6656 | 1964.973 |
| SGKDPNHFRPHGLPDKY | (-) |            | 655.6637 | 1964.973 |
| SGKDPNHFRPHGLPDKY | (-) |            | 655.6645 | 1964.973 |
| SGKDPnHFRPHGLPDKY | (-) | n:Deamida  | 655.9951 | 1964.973 |
| SGKDPNHFRPHGLPDKY | (-) |            | 655.6665 | 1964.973 |
| SGKDPNHFRPHGLPDKY | (-) |            | 393.8022 | 1964.973 |
| SGKDPNHFRPHGLPDKY | (-) |            | 655.6659 | 1964.973 |
| SGKDPnHFRPHGLPDKY | (-) | n:Deamida  | 394.0015 | 1964.973 |
| SGKDPnHFRPHGLPDKY | (-) | n:Deamida  | 983.4882 | 1964.973 |
| SGKDPNHFRPHGLPDKY | (-) |            | 982.996  | 1964.973 |
| SGKDPnHFRPHGLPDKY | (-) | n:Deamida  | 492.2483 | 1964.973 |
| SGKDPNHFRPHGLPDKY | (-) |            | 982.9936 | 1964.973 |
| SGKDPNHFRPHGLPDKY | (-) |            | 655.6644 | 1964.973 |
| SGKDPNHFRPHGLPDKY | (-) |            | 492.0021 | 1964.973 |
| SGKDPNHFRPHGLPDKY | (-) |            | 492.0021 | 1964.973 |
| SGKDPNHFRPHGLPDKY | (-) |            | 393.8053 | 1964.973 |
| SGKDPNHFRPHGLPDKY | (-) |            | 982.9959 | 1964.973 |
| SGKDPnHFRPHGLPDKY | (-) | n:Deamida  | 393.9995 | 1964.973 |
| SGKDPNHFRPHGLPDKY | (-) |            | 492.0017 | 1964.973 |
| SGKDPNHFRPHGLPDKY | (-) |            | 982.9907 | 1964.973 |
| SGKDPNHFRPHGLPDKY | (-) |            | 982.9911 | 1964.973 |
| SGKDPNHFRPHGLPDKY | (-) |            | 655.6642 | 1964.973 |
| SGKDPNHFRPHGLPDKY | (-) |            | 492.0026 | 1964.973 |
| SGKDPNHFRPHGLPDKY | (-) |            | 982.99   | 1964.973 |
| SGKDPNHFRPHGLPDKY | (-) |            | 491.9999 | 1964.973 |
| SGKDPNHFRPHGLPDKY | (-) |            | 393.8033 | 1964.973 |
| SGKDPnHFRPHGLPDKY | (-) | n:Deamida  | 983.489  | 1964.973 |
| SGKDPNHFRPHGLPDKY | (-) |            | 655.6645 | 1964.973 |
| SGKDPNHFRPHGLPDKY | (-) |            | 655.6645 | 1964.973 |
| SGKDPNHFRPHGLPDKY | (-) |            | 982.9892 | 1964.973 |
| SGKDPnHFRPHGLPDKY | (-) | n:Deamida  | 655.9943 | 1964.973 |
| SGKDPNHFRPHGLPDKY | (-) |            | 982.9924 | 1964.973 |
| SGkDPnHVRPDGLPEK  | (Y) | k:Carbamyl | 448.2298 | 1745.893 |
| SGKDPnYYRPPGLPAKY | (-) | n:Deamida  | 656.0041 | 1922.976 |
| SGkDPnYYRPPGLPDK  | (Y) | k:Carbamyl | 924.4663 | 1803.902 |
| SGRDPNHFR         | (P) |            | 362.5161 | 1085.524 |
| SGRDPNHFR         | (P) |            | 362.5132 | 1085.524 |
| SGRDPNHFR         | (P) |            | 362.5164 | 1085.524 |
| SGRDPNHFRPH       | (G) |            | 330.6647 | 1319.635 |

|                   |     |           |          |          |
|-------------------|-----|-----------|----------|----------|
| SGRDPNHFRPH       | (G) |           | 330.667  | 1319.635 |
| SGRDPNHFRPH       | (G) |           | 330.6671 | 1319.635 |
| SGRDPNHFRPH       | (G) |           | 330.6655 | 1319.635 |
| SGRDPNHFRPH       | (G) |           | 330.667  | 1319.635 |
| SGRDPNHFRPH       | (G) |           | 330.6661 | 1319.635 |
| SGRDPNHFRPH       | (G) |           | 330.667  | 1319.635 |
| SGRDPNHFRPH       | (G) |           | 330.667  | 1319.635 |
| SGRDPNHFRPH       | (G) |           | 440.5528 | 1319.635 |
| SGRDPNHFRPH       | (G) |           | 330.6658 | 1319.635 |
| SGRDPNHFRPHGLPDK  | (Y) |           | 458.2383 | 1829.915 |
| SGRDPNHFRPHGLPDK  | (Y) |           | 458.241  | 1829.915 |
| SGRDPNHFRPHGLPDK  | (Y) |           | 366.7904 | 1829.915 |
| SGRDPNHFRPHGLPDK  | (Y) |           | 366.7912 | 1829.915 |
| SGRDPNHFRPHGLPDK  | (Y) |           | 366.7897 | 1829.915 |
| SGRDPNHFRPHGLPDK  | (Y) |           | 610.6452 | 1829.915 |
| SGRDPNHFRPHGLPDK  | (Y) |           | 458.241  | 1829.915 |
| SGRDPNHFRPHGLPDK  | (Y) |           | 610.6455 | 1829.915 |
| SGRDPNHFRPHGLPDK  | (Y) |           | 610.6473 | 1829.915 |
| SGRDPNHFRPHGLPDK  | (Y) |           | 366.7888 | 1829.915 |
| SGRDPNHFRPHGLPDK  | (Y) |           | 366.7904 | 1829.915 |
| SGRDPNHFRPHGLPDK  | (Y) |           | 366.7905 | 1829.915 |
| SGRDPnHFRPHGLPDK  | (Y) | n:Deamida | 366.9922 | 1829.915 |
| SGRDPnHFRPHGLPDKY | (-) | n:Deamida | 499.2503 | 1992.979 |
| SGRDPNHFRPHGLPDKY | (-) |           | 499.004  | 1992.979 |
| SGRDPNHFRPHGLPDKY | (-) |           | 664.9988 | 1992.979 |
| SGRDPNHFRPHGLPDKY | (-) |           | 499.0028 | 1992.979 |
| SGRDPnHFRPHGLPDKY | (-) | n:Deamida | 499.2542 | 1992.979 |
| SGRDPNHFRPHGLPDKY | (-) |           | 665.0001 | 1992.979 |
| SGRDPNHFRPHGLPDKY | (-) |           | 665.0002 | 1992.979 |
| SGRDPNHFRPHGLPDKY | (-) |           | 664.9989 | 1992.979 |
| SGRDPNHFRPHGLPDKY | (-) |           | 665.0002 | 1992.979 |
| SGRDPNHFRPHGLPDKY | (-) |           | 399.4038 | 1992.979 |
| SGRDPNHFRPHGLPDKY | (-) |           | 399.4042 | 1992.979 |
| SGRDPnHFRPHGLPDKY | (-) | n:Deamida | 399.6014 | 1992.979 |
| SGRDPNHFRPHGLPDKY | (-) |           | 499.0027 | 1992.979 |
| SGRDPnHFRPHGLPDKY | (-) | n:Deamida | 665.3246 | 1992.979 |
| SGRDPNHFRPHGLPDKY | (-) |           | 499.0023 | 1992.979 |
| SGRDPNHFRPHGLPDKY | (-) |           | 665.0026 | 1992.979 |
| SGRDPNHFRPHGLPDKY | (-) |           | 664.9994 | 1992.979 |
| SGRDPNHFRPHGLPDKY | (-) |           | 664.9994 | 1992.979 |
| SGRDPNHFRPHGLPDKY | (-) |           | 499.0032 | 1992.979 |
| SGRDPnHFRPHGLPDKY | (-) | n:Deamida | 499.2503 | 1992.979 |
| SGRDPnHFRPHGLPDKY | (-) | n:Deamida | 499.2555 | 1992.979 |
| SGRDPNHFRPHGLPDKY | (-) |           | 664.9989 | 1992.979 |
| SGRDPNHFRPHGLPDKY | (-) |           | 499.0026 | 1992.979 |
| SGRDPnHFRPHGLPDKY | (-) | n:Deamida | 665.3246 | 1992.979 |
| SGRDPNHFRPHGLPDKY | (-) |           | 665.0006 | 1992.979 |

|                                          |     |                      |          |          |
|------------------------------------------|-----|----------------------|----------|----------|
| SGRDPNHFRPHGLPDKY                        | (-) |                      | 665.0009 | 1992.979 |
| SGRDPnHFRPHGLPDKY                        | (-) | n:Deamida            | 665.3263 | 1992.979 |
| SGRDPnHFRPHGLPDKY                        | (-) | n:Deamida            | 499.2547 | 1992.979 |
| SILVQALAVLQALYkCHDEWCSkSDTSLPLIGSILR     | (V) | C:Carbamic           | 835.0453 | 4085.156 |
| SKCPRLTEICVgILGnMACFQETCLSIgK            | (N) | SKCPRLTEIC:Carbamic  | 700.1284 | 3372.624 |
| SLFLGVSGDGWYSFFR                         | (E) |                      | 613.2981 | 1837.891 |
| SLFLGVSGDGWYSFFR                         | (E) |                      | 613.2981 | 1837.891 |
| SLGVFLNGHFQ                              | (N) |                      | 609.8223 | 1218.627 |
| SLPLVGSLIQ                               | (V) |                      | 513.8041 | 1026.619 |
| SLPLVGSLIQ                               | (V) |                      | 513.8041 | 1026.619 |
| SLPLVGSLIQ                               | (V) |                      | 513.8038 | 1026.619 |
| SLYIRERE                                 | (M) |                      | 533.2863 | 1065.569 |
| SNFIGADKY                                | (F) |                      | 507.7527 | 1014.489 |
| SNFIGADKY                                | (F) |                      | 507.7515 | 1014.489 |
| SNIFQALTKETVTKGLK                        | (E) |                      | 626.6931 | 1878.07  |
| SNIFQALTKETVTKGLK                        | (E) |                      | 626.6936 | 1878.07  |
| SNIFQALTKETVTKGLK                        | (E) |                      | 626.6936 | 1878.07  |
| SNIFQALTKETVTKGLK                        | (E) |                      | 626.6936 | 1878.07  |
| SNIFQALTKETVTKGLK                        | (E) |                      | 626.6931 | 1878.07  |
| SNSDDEEQQTELDEEMENEICRVWDMsMEDVALFLQI    | (L) | C:Carbamic           | 1425.836 | 5700.39  |
| SPPPPSR                                  | (D) |                      | 369.2014 | 737.394  |
| SPVVEDFIKILREVDKVLADDLEKSFPSLK           | (V) |                      | 1143.952 | 3429.888 |
| SQRITDLFK                                | (F) |                      | 554.3049 | 1107.616 |
| SQRVTDLFKYGDSGHGVEDSKADQAANEWGRSGKDP     | (N) |                      | 977.7262 | 3907.823 |
| SSQCFGSCPVYSkLPnKYEWLDVYMhILQLLTTVDDGIQA | (D) | C:Carbamic           | 819.1061 | 5683.737 |
| SSQCFGSCPVYSkLPnKYEWLDVYMhILQLLTTVDDGIQA | (D) | SSQCFGSCF C:Carbamic | 818.9715 | 5683.737 |
| SSQCFGSCPVYSkLPnKYEWLDVYMhILQLLTTVDDGIQA | (D) | SSQCFGSCF C:Carbamic | 818.9668 | 5683.737 |
| SSQCFGSCPVYSkLPnKYEWLDVYMhILQLLTTVDDGIQA | (D) | SSQCFGSCF C:Carbamic | 819.1027 | 5683.737 |
| SSQCFGSCPVYSkLPnKYEWLDVYMhILQLLTTVDDGIQA | (D) | SSQCFGSCF C:Carbamic | 818.9612 | 5683.737 |
| SSQCFGSCPVYSkLPnKYEWLDVYmHILQLLTTVDDGIQA | (D) | C:Carbamic           | 827.4109 | 5683.737 |
| SSSYGIQGAMSSGRNGVTER                     | (F) |                      | 682.0003 | 2043.951 |
| SSSYGIQGAMSSGRNGVTER                     | (F) |                      | 681.9986 | 2043.951 |
| STLVQAFAVLQALYRCQDQWkSk                  | (A) | C:Carbamic           | 707.3616 | 2740.424 |
| SVGPSVDDSPPELPDFKIVPCILEAAKQVRSDNP       | (E) | C:Carbamic           | 618.9844 | 3708.843 |
| SWITSPSCENKEEEDSQLDITFCLLEAAK            | (Q) | C:Carbamic           | 883.149  | 3529.599 |
| TDLTQDDFHLKILK                           | (D) |                      | 843.9517 | 1686.906 |
| TFLREAGQGTK                              | (D) |                      | 604.318  | 1207.643 |
| TFQDVYFVSESFEDAKEKMREFTKTIRRPFGVKYNPYTR  | (S) |                      | 962.8831 | 4810.409 |
| TFQDVYFVSESFEDAKEKMREFTKTIRRPFGVKYNPYTR  | (S) |                      | 962.8872 | 4810.409 |
| TFQDVYFVSESFEDAKEKMREFTKTIRRPFGVKYNPYTR  | (S) |                      | 962.8847 | 4810.409 |
| TGFsIRPVAGYLSPR                          | (D) | TGFsIRPVA s:Phosphor | 567.6175 | 1620.886 |
| TKGLKEGQLSK                              | (Q) |                      | 396.9024 | 1188.695 |
| TLADDLEKSF                               | (P) |                      | 569.7936 | 1138.563 |
| TLADDLEKSFPSLK                           | (A) |                      | 521.9374 | 1563.826 |
| TLAGNLEESFPSLK                           | (N) |                      | 502.6009 | 1505.785 |
| TLAGNLEEsFPSLKR                          | (S) | s:Phosphor           | 581.294  | 1661.886 |
| TLAGNLEESFPSLkRSFR                       | (E) | k:Acetyl             | 524.2698 | 2052.087 |



|                                                       |     |                        |          |          |
|-------------------------------------------------------|-----|------------------------|----------|----------|
| TLLASILSVLSAmFASETQQEYVnIGk                           | (N) | m:Oxidized             | 744.14   | 2913.528 |
| TLLASILSVLSAmFASETQQEYVnIGkNRALVGLSLTHILQHI           | (E) | C:Carbamic             | 881.618  | 5226.729 |
| TMKLFTGLVFCSLVLGVSSQWYSFLGEEAAQ                       | (G) | C:Carbamic             | 835.6623 | 3339.679 |
| TMKLFTGLVFCSLVLGVSSQWYSFLGEEAAQ                       | (G) | C:Carbamic             | 668.7326 | 3339.679 |
| TMKLFTGLVFCSLVLGVSSQWYSFLGEEAAQ                       | (G) | C:Carbamic             | 835.6623 | 3339.679 |
| TVIWTFtYK                                             | (L) | TVIWTFtYK t:Phosphor   | 619.8071 | 1158.619 |
| TVIWTFtYK                                             | (L) | TVIWTFtYK t:Phosphor   | 619.8015 | 1158.619 |
| TVIWTFtYK                                             | (L) | TVIWTFtYK t:Phosphor   | 619.8073 | 1158.619 |
| TVIWTFtYK                                             | (L) | TVIWTFtYK t:Phosphor   | 619.8073 | 1158.619 |
| TVIWTFtYK                                             | (L) | TVIWTFtYK t:Phosphor   | 619.8071 | 1158.619 |
| TVIWTFtYK                                             | (L) | TVIWTFtYK t:Phosphor   | 619.8071 | 1158.619 |
| TVIWTFtYKLLWS                                         | (K) |                        | 829.4566 | 1657.899 |
| TVLASAFSVLSAIYASQTEQEYLKIEKGsHNLAQACHK                | (L) | TVLASAFSV C:Carbamic   | 1089.04  | 4193.134 |
| TVLASIFSVLSAIYASQ                                     | (A) |                        | 590.6523 | 1769.968 |
| TVLASVFSVLSAIYASQAEQEYLKIEKGKYHFDLPLI                 | (D) |                        | 835.0603 | 4171.237 |
| TVLASVFSVLSAIYASQAEQEYLKIEKGKYHFDLPLI                 | (D) |                        | 696.0529 | 4171.237 |
| TVLAsVFSVLSAIYASQAEQEYLKIEKVDLPLIDSLIR                | (V) | TVLAsVFSV s:Phosphor   | 861.26   | 4222.326 |
| TVLAsVFSVLSAIYASQTEQEYLKIGK                           | (V) | TVLAsVFSV s:Phosphor   | 621.9181 | 2945.587 |
| TVLASVYVLSAIYVS                                       | (R) |                        | 836.4618 | 1671.92  |
| TVLASVYVLSAIYVS                                       | (R) |                        | 836.4603 | 1671.92  |
| TVLASVYVLSIYASQAEQEYLKIEEGKYHLPLIDSLIRVLQ             | (K) | C:Carbamic             | 828.5878 | 5793.987 |
| TVLASVYVLSIYASQAEQEYLKIEEGKYHLPLIDSLIRVLQ             | (K) | C:Carbamic             | 828.5878 | 5793.987 |
| TVPWFPK                                               | (K) |                        | 437.7372 | 874.482  |
| TWDMIR                                                | (A) | TWDMIR TWDMLR          | 411.2084 | 821.397  |
| TWDMIR                                                | (A) | TWDMIR TWDMLR          | 411.2036 | 821.397  |
| TWDMIR                                                | (A) | TWDMIR TWDMLR          | 411.2031 | 821.397  |
| TWDMIR                                                | (A) | TWDMIR TWDMLR          | 411.2042 | 821.397  |
| TWGTVFRELNK                                           | (L) |                        | 450.9036 | 1350.716 |
| TWGTVFRELNK                                           | (L) |                        | 450.9042 | 1350.716 |
| TWGTVFRELNK                                           | (L) |                        | 450.9033 | 1350.716 |
| VDKVLADYLEENFPSLK                                     | (E) |                        | 660.6757 | 1980.032 |
| VDLPLIDSLIRVLQnmEQCQKKPEnSAESnTGETk                   | (K) | C:Carbamic             | 810.2007 | 3985.001 |
| VDLPLIDSLIRVLQNMEEQCQkKPEnSAESnTGETK                  | (K) | VDLPLIDSLI C:Carbamic  | 1008.243 | 3985.001 |
| VEQEYLK                                               | (I) |                        | 454.7386 | 908.472  |
| VEQEYLK                                               | (I) |                        | 454.7387 | 908.472  |
| VEQEYLkIEK                                            | (S) | VEQEYLkIEl y:Phosphor  | 700.8482 | 1278.694 |
| VGDLVDKLFDLDEELMkTWItDKPQDk                           | (R) | VGDLVDKLI k:Acetyl,t:F | 1119.19  | 3191.618 |
| VGDLVDKLFDLDEELMKTWITDKPQDKRGDESPTPL                  | (D) |                        | 833.2014 | 4162.054 |
| VGDVVDK                                               | (L) |                        | 366.1962 | 731.393  |
| VGGLIK                                                | (A) |                        | 293.6995 | 586.392  |
| VGILGNMTCFQEICVSISSDKNLGEVLLHCLYSDPPTLLE <sup>-</sup> | (I) | C:Carbamic             | 1224.366 | 4894.377 |
| VISDAR                                                | (E) |                        | 330.6875 | 660.367  |
| VISDAR                                                | (E) |                        | 330.6877 | 660.367  |
| VISDAR                                                | (E) |                        | 330.6872 | 660.367  |
| VISDAR                                                | (E) |                        | 330.6871 | 660.367  |
| VISDAR                                                | (E) |                        | 330.6877 | 660.367  |
| VISDAR                                                | (E) |                        | 330.6885 | 660.367  |

|                                              |     |                      |          |          |
|----------------------------------------------|-----|----------------------|----------|----------|
| VISDAR                                       | (E) |                      | 330.6877 | 660.367  |
| VISDAR                                       | (E) |                      | 330.6872 | 660.367  |
| VISDAR                                       | (E) |                      | 330.6876 | 660.367  |
| VISDAR                                       | (E) |                      | 330.6906 | 660.367  |
| VISDAREAVQ                                   | (K) | VISDAREAVQ VISDARE   | 544.2878 | 1087.574 |
| VISDAREAVQKFTG                               | (H) |                      | 507.6119 | 1520.807 |
| VISDAREDLQ                                   | (R) |                      | 573.2915 | 1145.58  |
| VISDAREKSQRITDLFKFG                          | (D) |                      | 1105.597 | 2210.193 |
| VISDARENFQRFTDRFSF                           | (G) |                      | 745.6951 | 2235.094 |
| VISDAREnIQRFTDPLFK                           | (G) | n:Deamida            | 717.3859 | 2149.14  |
| VISDAREnIQRFTDPLFK                           | (G) | n:Deamida            | 717.3799 | 2149.14  |
| VISDAREnIQRFTDPLFK                           | (G) | n:Deamida            | 717.3831 | 2149.14  |
| VISDAREnIQRFTDPLFK                           | (G) | n:Deamida            | 717.3857 | 2149.14  |
| VISDARER                                     | (S) |                      | 473.2669 | 945.511  |
| VISDGR                                       | (E) |                      | 323.6787 | 646.352  |
| VISDGR                                       | (E) |                      | 323.6793 | 646.352  |
| VISDGR                                       | (E) |                      | 323.6795 | 646.352  |
| VISDGR                                       | (E) |                      | 323.6791 | 646.352  |
| VISDGR                                       | (E) |                      | 323.6787 | 646.352  |
| VISDGR                                       | (E) |                      | 323.6805 | 646.352  |
| VISDGR                                       | (E) |                      | 323.6778 | 646.352  |
| VISDGR                                       | (E) |                      | 323.6802 | 646.352  |
| ViSNAREDIQQFLGHGAEDSLADQAAnEWGRSGk           | (D) | s:Phosphor           | 1265.242 | 3669.764 |
| VISNARENSQR                                  | (V) |                      | 637.3275 | 1273.661 |
| VISNARENSQR                                  | (V) |                      | 637.3406 | 1273.661 |
| VISNARETIQ                                   | (G) |                      | 565.8156 | 1130.616 |
| VISNARETIQGItdPLFKCmTR                       | (D) | VISNARETI(C:Carbamic | 530.0562 | 2550.317 |
| VkPFDPKITckQECLITTFQDVYFVSESFEDAK            | (E) | C:Carbamic           | 1035.243 | 3969.929 |
| VLADBLEKSFPSLK                               | (V) |                      | 521.2925 | 1561.847 |
| VLADBLEKSFPSLK                               | (V) |                      | 781.4408 | 1561.847 |
| VLADYLEEnFPsLkEkHVnLLHIESR                   | (K) | n:Deamida            | 815.6626 | 3093.637 |
| VLADYLEENFPSLKEVALSACGfk                     | (G) | C:Carbamic           | 686.5859 | 2700.359 |
| VLEDSKSNEKAEEWGRSGKDPDRFRPDGLPK              | (K) |                      | 1181.606 | 3542.762 |
| VLKDVSCCELLSNIFQDLtKEIVLQALK                 | (E) | C:Carbamic           | 533.6179 | 3116.728 |
| VLQNIEH                                      | (C) | VLQNIEH              | 426.7351 | 852.457  |
| VLQNIEH                                      | (C) |                      | 426.7337 | 852.457  |
| VLQNIEH                                      | (C) |                      | 426.7258 | 852.457  |
| VLQNIEH                                      | (C) |                      | 426.7367 | 852.457  |
| VLQNIEH                                      | (C) |                      | 426.7326 | 852.457  |
| VLQNIEH                                      | (C) |                      | 426.7342 | 852.457  |
| VLQNIEH                                      | (C) |                      | 426.7333 | 852.457  |
| VLQNIEH                                      | (C) |                      | 426.7305 | 852.457  |
| VLQNIEH                                      | (C) |                      | 426.7257 | 852.457  |
| VLQNIEH                                      | (C) |                      | 426.738  | 852.457  |
| VLQNIEH                                      | (C) |                      | 426.7286 | 852.457  |
| VLQNIEHCQKKPENSVESNTEETKKSDLTQEDFHLKILKDI(L) | (L) | C:Carbamic           | 1430.333 | 7147.588 |
| VLQNMEHCQkkPENSADSNAEETK                     | (K) | C:Carbamic           | 719.0865 | 2787.267 |

|                                           |     |          |              |          |          |
|-------------------------------------------|-----|----------|--------------|----------|----------|
| VLQNMEHCQkkPENSADSNAEETK                  | (K) |          | C:Carbamic   | 719.0802 | 2787.267 |
| VLQNMEHCQkKPENSADSNAEETk                  | (K) | VLQNMEHk | C:Carbamic   | 719.0777 | 2787.267 |
| VLQNmEQCQKKPENSASNTTEETKK                 | (T) |          | C:Carbamic   | 989.4798 | 2950.388 |
| VLQnmEQCQKKPENSVESnTDETKK                 | (T) |          | C:Carbamic   | 994.7977 | 2964.404 |
| VLQnmEQCQKKPENSVESnTDETKK                 | (T) |          | C:Carbamic   | 994.7978 | 2964.404 |
| VLREVDETLADDLE                            | (E) |          |              | 808.8893 | 1616.801 |
| VLSFPGTWDmLRAYNDMREAnYIGADk               | (Y) | VLSFPGTW | m:Oxidized   | 533.0774 | 3133.487 |
| VQAAQGAGDMWRAYQDMKK                       | (S) |          |              | 718.675  | 2154.022 |
| VTDLFKFGDSGHGEADSRAD                      | (Q) |          |              | 708.6697 | 2123.963 |
| VTDLFKHGDSGH                              | (G) |          |              | 656.8162 | 1312.628 |
| VTDLFKHGDSGH                              | (G) |          |              | 656.815  | 1312.628 |
| VTDWLK                                    | (H) |          |              | 381.218  | 761.419  |
| VWDMAMDKDVAGLLQAFK                        | (A) |          |              | 680.0074 | 2038.014 |
| VWDmsmDEDVALFLQEFKAPDIFmGVLAK             | (S) |          | m:Oxidized   | 695.5305 | 3345.624 |
| VWDmsmDEDVALFLQEFKAPDIFmGVLAK             | (S) |          | m:Oxidized   | 869.1591 | 3345.624 |
| VWDmsmDEDVALFLQEFNAPDIFmGILAK             | (S) | VWDmsm   | l m:Oxidized | 695.5275 | 3345.588 |
| WAAAVISNGR                                | (E) |          |              | 522.7846 | 1044.559 |
| WAAGVISDAREMVQGSSGRGHEDSA                 | (A) |          |              | 858.4113 | 2573.18  |
| WLTLKEAGQGTRDMWRAYSMDREANYKNSDKYFHAF      | (K) |          |              | 1217.79  | 6084.858 |
| WTNPRKSLK                                 | (S) |          |              | 565.3288 | 1129.648 |
| WVQFMKEAGQGSRDMWRAYSMDKKNWKNSDKYFH        | (R) |          |              | 733.6892 | 4397.059 |
| YCGYREDNIPQLEDVSnFLKER                    | (T) |          | C:Carbamic   | 698.0797 | 2745.294 |
| YDAAQRGPGGAWVAKLISDAREDIQQFLGHGAEDSLAD    | (D) |          |              | 1043.325 | 5212.522 |
| YDAARRG                                   | (P) | YDAARRG  |              | 404.7039 | 808.406  |
| YDAARRG                                   | (P) | YDAARRG  |              | 404.7035 | 808.406  |
| YDAARRG                                   | (P) | YDAARRG  |              | 404.7028 | 808.406  |
| YDAARRG                                   | (P) |          |              | 404.7025 | 808.406  |
| YDAARRG                                   | (P) |          |              | 404.7021 | 808.406  |
| YDAARRG                                   | (P) |          |              | 404.7029 | 808.406  |
| YDAARRG                                   | (P) |          |              | 404.7056 | 808.406  |
| YDAARRG                                   | (P) |          |              | 404.7026 | 808.406  |
| YDAARRG                                   | (P) |          |              | 404.7021 | 808.406  |
| YDAARRGPGGAWAAKVISDGRENFQRFTDRFSFGGSGR    | (G) |          |              | 833.4145 | 4163.046 |
| YEFNAPDIFMGVLAR                           | (T) |          |              | 581.6233 | 1742.857 |
| YFADLAMSYPKGDPIPKVEFTEEEIKTWGTVFRELNKLYPT | (S) |          | C:Carbamic   | 1625.064 | 6497.303 |
| YFHARG                                    | (N) |          |              | 375.6926 | 750.368  |
| YFHARG                                    | (N) |          |              | 375.6902 | 750.368  |
| YFHARGNFDAARR                             | (G) |          |              | 527.5887 | 1580.783 |
| YFHARGNFDAARR                             | (G) |          |              | 527.5893 | 1580.783 |
| YFHARGNFDAARR                             | (G) |          |              | 790.8825 | 1580.783 |
| YFHARGNFDAARR                             | (G) |          |              | 790.8796 | 1580.783 |
| YFHARGNFDAARRPGGLWAAEVISDLREMVQKYSDSG     | (W) |          |              | 818.9668 | 5726.685 |
| YFHARGNYDAAQRGPGGAWAAKVISDAREKSQRITDLF    | (G) |          |              | 900.4701 | 4498.292 |
| YFHARGNYDAARR                             | (G) |          |              | 798.9053 | 1596.778 |
| YFHARGNYDAASRGAGGR                        | (V) |          |              | 963.4618 | 1925.911 |
| YFHARGNYDAASRGAGGR                        | (V) |          |              | 963.462  | 1925.911 |
| YFHARGNYDAASRGAGGR                        | (V) |          |              | 963.4426 | 1925.911 |

|                                              |     |            |          |          |
|----------------------------------------------|-----|------------|----------|----------|
| YFHARGNYDAASRGAGGR                           | (V) |            | 963.4506 | 1925.911 |
| YFHARGNYDAASRGAGGR                           | (V) |            | 963.463  | 1925.911 |
| YFHARGnYDAASRGAGGR                           | (V) | n:Deamida  | 963.9628 | 1925.911 |
| YFHARGnYDAASRGAGGR                           | (V) | n:Deamida  | 963.9646 | 1925.911 |
| YFHARGnYDAASRGAGGR                           | (V) | n:Deamida  | 963.9628 | 1925.911 |
| YFHARGNYDAASRGAGGR                           | (V) |            | 963.4563 | 1925.911 |
| YFHARGNYDAASRGAGGR                           | (V) |            | 963.4536 | 1925.911 |
| YFHARGNYDAASRGAGGR                           | (V) |            | 963.4607 | 1925.911 |
| YFHARGnYDAASRGAGGR                           | (V) | n:Deamida  | 963.959  | 1925.911 |
| YFHARGnYDAASRGAGGR                           | (V) | n:Deamida  | 963.9561 | 1925.911 |
| YFHARGNYDAASRGAGGR                           | (V) |            | 963.4663 | 1925.911 |
| YFHARGNYDAASRGAGGR                           | (V) |            | 963.4658 | 1925.911 |
| YFHARGnYDAATkGTGR                            | (R) | n:Deamida  | 964.4628 | 1884.91  |
| yFQGLMNRYyFGIRDHGLESLQSTQk                   | (A) | y:Phosphor | 819.3892 | 3151.542 |
| yFQGLMNRYyFGIRDHGLESLQSTQk                   | (A) | y:Phosphor | 819.3998 | 3151.542 |
| YHLPLIDSLIRVLQNMEHCQKkPEnSVDSNTEETK          | (K) | C:Carbamic | 1404.01  | 4166.065 |
| YIGADK                                       | (Y) |            | 333.678  | 666.346  |
| YIGADK                                       | (Y) |            | 333.6777 | 666.346  |
| YIGADK                                       | (Y) |            | 333.6774 | 666.346  |
| YIGADK                                       | (Y) |            | 333.6769 | 666.346  |
| YKNSDKYFHARGNYDAAQRGPGGVWAAEVISDARENIQ (L)   |     |            | 1096.285 | 4382.145 |
| YLTRETCLAAANSLPSYkPSFQHLLAALSETDPKLADVMT (-) |     | C:Carbamic | 1042.544 | 5124.57  |
| YLTRETCLAAANSLPSYkPSFQHLLAALSETDPKLADVMT (-) |     | C:Carbamic | 1042.531 | 5124.57  |
| YLTRETCLAAANSLPSYkPSFQHLLAALSETDPKLADVMT (-) |     | C:Carbamic | 1042.534 | 5124.57  |
| YSDMKEANYIGADKYFHARGNYDAAQRGPGGAWAAK (V)     |     |            | 790.7733 | 3949.846 |
| YSDMKEANYIGADKYFHARGNYDAAQRGPGGAWAAK (V)     |     |            | 790.7809 | 3949.846 |
| YSDSGFDAEDsAADQKANHWGR                       | (S) | s:Phosphor | 850.3484 | 2427.023 |

| species | accession_1   | accession_2 | entry_name                |
|---------|---------------|-------------|---------------------------|
| 9TELE   | NO1 A0A1A8S3Z | A0A1A8S3Z   | Serum amyloid A-like 1    |
| 9TELE   | A0A1A7WC      | A0A1A7WC    | Serum amyloid A-like 1    |
| MACNP   | A0A515EIR     | A0A515EIR   | Serum amyloid A           |
| TAKRU   | H2U9W6        | H2U9W6      | Serum amyloid A-like 1    |
| VULVU   | PIC A0A3Q7RF  | A0A3Q7RF    | Serum amyloid A protein   |
| VULVU   | PIC A0A3Q7RF  | A0A3Q7RF    | Serum amyloid A protein   |
| VULVU   | PIC A0A3Q7RF  | A0A3Q7RF    | Serum amyloid A protein   |
| VULVU   | PIC A0A3Q7RF  | A0A3Q7RF    | Serum amyloid A protein   |
| VULVU   | PIC A0A3Q7RF  | A0A3Q7RF    | Serum amyloid A protein   |
| VULVU   | PIC A0A3Q7RF  | A0A3Q7RF    | Serum amyloid A protein   |
| VULVU   | PIC A0A3Q7RF  | A0A3Q7RF    | Serum amyloid A protein   |
| VULVU   | PIC A0A3Q7RF  | A0A3Q7RF    | Serum amyloid A protein   |
| VULVU   | PIC A0A3Q7RF  | A0A3Q7RF    | Serum amyloid A protein   |
| VULVU   | PIC A0A3Q7RF  | A0A3Q7RF    | Serum amyloid A protein   |
| VULVU   | PIC A0A3Q7RF  | A0A3Q7RF    | Serum amyloid A protein   |
| VULVU   | PIC A0A3Q7RF  | A0A3Q7RF    | Serum amyloid A protein   |
| VULVU   | PIC A0A3Q7RF  | A0A3Q7RF    | Serum amyloid A protein   |
| VULVU   | PIC A0A3Q7RF  | A0A3Q7RF    | Serum amyloid A protein   |
| VULVU   | PIC A0A3Q7RF  | A0A3Q7RF    | Serum amyloid A protein   |
| VULVU   | PIC A0A3Q7RF  | A0A3Q7RF    | Serum amyloid A protein   |
| VULVU   | PIC A0A3Q7RF  | A0A3Q7RF    | Serum amyloid A protein   |
| VULVU   | PIC A0A3Q7RF  | A0A3Q7RF    | Serum amyloid A protein   |
| VULVU   | PIC A0A3Q7RF  | A0A3Q7RF    | Serum amyloid A protein   |
| VULVU   | PIC A0A3Q7RF  | A0A3Q7RF    | Serum amyloid A protein   |
| VULVU   | PIC A0A3Q7RF  | A0A3Q7RF    | Serum amyloid A protein   |
| VULVU   | PIC A0A3Q7RF  | A0A3Q7RF    | Serum amyloid A protein   |
| VULVU   | PIC A0A3Q7RF  | A0A3Q7RF    | Serum amyloid A protein   |
| VULVU   | PIC A0A3Q7RF  | A0A3Q7RF    | Serum amyloid A protein   |
| VULVU   | PIC A0A3Q7RF  | A0A3Q7RF    | Serum amyloid A protein   |
| VULVU   | PIC A0A3Q7RF  | A0A3Q7RF    | Serum amyloid A protein   |
| VULVU   | PIC A0A3Q7RF  | A0A3Q7RF    | Serum amyloid A protein   |
| VULVU   | PIC A0A3Q7RF  | A0A3Q7RF    | Serum amyloid A protein   |
| VULVU   | PIC A0A3Q7RF  | A0A3Q7RF    | Serum amyloid A protein   |
| VULVU   | PIC A0A3Q7RF  | A0A3Q7RF    | Serum amyloid A protein   |
| VULVU   | PIC A0A3Q7RF  | A0A3Q7RF    | Serum amyloid A protein   |
| VULVU   | PIC A0A3Q7RF  | A0A3Q7RF    | Serum amyloid A protein   |
| RABIT   | P35543        | P35543      | Serum amyloid A-3 protein |
| LATCH   | H3AUK4        | H3AUK4      | Serum amyloid A like 1    |
| RAT     | Q5M878        | Q5M878      | Serum amyloid A protein   |
| RAT     | Q5M878        | Q5M878      | Serum amyloid A protein   |
| RAT     | Q5M878        | Q5M878      | Serum amyloid A protein   |
| NOTKU   | A0A1A8KK      | A0A1A8KK    | Serum amyloid A protein   |
| TAKRU   | H2V509        | H2V509      | Serum amyloid A protein   |
| TAKRU   | H2V509        | H2V509      | Serum amyloid A protein   |
| TAKRU   | H2U9W6        | H2U9W6      | Serum amyloid A-like 1    |





HORSE A0A5F5Q4|A0A5F5Q4|Serum amyloid A like 1  
HORSE A0A5F5Q4|A0A5F5Q4|Serum amyloid A like 1  
RABIT A0A5F9DS(A0A5F9DS(Serum amyloid A like 1  
PANTR|PAI A0A2I3SXC A0A2I3SXC Serum amyloid A like 1  
CEREL B6D986 B6D986 Serum amyloid A protein  
9TELE A0A1A7WC A0A1A7WC Serum amyloid A-like 1  
SAIBB A0A2K6RY\A0A2K6RY\ Serum amyloid A like 1  
9TELE A0A1A7WC A0A1A7WC Serum amyloid A-like 1  
SAIBB A0A2K6RY\A0A2K6RY\ Serum amyloid A like 1  
SAIBB|RHIF A0A2K6RY\A0A2K6RY\ Serum amyloid A like 1  
MUSPF|BC M3YQK5 M3YQK5|E Serum amyloid A like 1  
MUSPF|BC M3YQK5 M3YQK5|E Serum amyloid A like 1  
MUSPF|BC M3YQK5 M3YQK5|E Serum amyloid A like 1  
TAKRU H2U9W6 H2U9W6|f Serum amyloid A-like 1  
NOTKU A0A1A8KK:A0A1A8KK: Serum amyloid A protein  
9TELE A0A1A7W9 A0A1A7W9 Serum amyloid A protein  
MONDO F7FFU5 F7FFU5 Serum amyloid A like 1  
HUMAN|BI A0A0D5ZZ:A0A0D5ZZ: Serum amyloid A protein  
ORNAN F6QGS9 F6QGS9 Serum amyloid A like 1  
ORNAN F6QGS9 F6QGS9 Serum amyloid A like 1  
VULVU|PIC A0A3Q7RF:A0A3Q7RF: Serum amyloid A protein  
VULVU|PIC A0A3Q7RF:A0A3Q7RF: Serum amyloid A protein  
VULVU|PIC A0A3Q7RF:A0A3Q7RF: Serum amyloid A protein













|            |           |             |                                                  |
|------------|-----------|-------------|--------------------------------------------------|
| HORSE      | F6PJF6    | F6PJF6      | Serum amyloid A protein                          |
| HORSE      | F6PJF6    | F6PJF6      | Serum amyloid A protein                          |
| FELCA      | Q5XXU5    | Q5XXU5      | Serum amyloid A protein (Fragment)               |
| HORSE      | A0A5F5Q0I | A0A5F5Q0I   | Serum amyloid A protein                          |
| MACMU      | F6V9Q5    | F6V9Q5      | Constitutively expressed serum amyloid A protein |
| MACMU      | F6V9Q5    | F6V9Q5      | Constitutively expressed serum amyloid A protein |
| SHEEP      | P42819    | P42819      | Serum amyloid A protein                          |
| SHEEP      | P42819    | P42819      | Serum amyloid A protein                          |
| MOUSE   D/ | Q3UWC2    | Q3UWC2   C  | Serum amyloid A protein                          |
| MOUSE      | Q3UWC2    | Q3UWC2      | Serum amyloid A protein                          |
| MOUSE      | Q3UWC2    | Q3UWC2      | Serum amyloid A protein                          |
| NOMLE   FE | A0A2I3HAC | A0A2I3HAC   | Serum amyloid A protein                          |
| NOMLE   FE | A0A2I3HAC | A0A2I3HAC   | Serum amyloid A protein                          |
| NOMLE   FE | A0A2I3HAC | A0A2I3HAC   | Serum amyloid A protein                          |
| NOMLE   FE | A0A2I3HAC | A0A2I3HAC   | Serum amyloid A protein                          |
| NOMLE   FE | A0A2I3HAC | A0A2I3HAC   | Serum amyloid A protein                          |
| NOMLE   FE | A0A2I3HAC | A0A2I3HAC   | Serum amyloid A protein                          |
| NOMLE   FE | A0A2I3HAC | A0A2I3HAC   | Serum amyloid A protein                          |
| NOMLE   FE | A0A2I3HAC | A0A2I3HAC   | Serum amyloid A protein                          |
| NOMLE   FE | A0A2I3HAC | A0A2I3HAC   | Serum amyloid A protein                          |
| NOMLE   FE | A0A2I3HAC | A0A2I3HAC   | Serum amyloid A protein                          |
| NOMLE   FE | A0A2I3HAC | A0A2I3HAC   | Serum amyloid A protein                          |
| NOMLE   FE | A0A2I3HAC | A0A2I3HAC   | Serum amyloid A protein                          |
| NOMLE   FE | A0A2I3HAC | A0A2I3HAC   | Serum amyloid A protein                          |
| NOMLE   FE | A0A2I3HAC | A0A2I3HAC   | Serum amyloid A protein                          |
| NOMLE   FE | A0A2I3HAC | A0A2I3HAC   | Serum amyloid A protein                          |
| NOMLE   FE | A0A2I3HAC | A0A2I3HAC   | Serum amyloid A protein                          |
| NOMLE   FE | A0A2I3HAC | A0A2I3HAC   | Serum amyloid A protein                          |
| NOMLE   FE | A0A2I3HAC | A0A2I3HAC   | Serum amyloid A protein                          |
| NOMLE   FE | A0A2I3HAC | A0A2I3HAC   | Serum amyloid A protein                          |
| NOMLE   FE | A0A2I3HAC | A0A2I3HAC   | Serum amyloid A protein                          |
| NOMLE   FE | A0A2I3HAC | A0A2I3HAC   | Serum amyloid A protein                          |
| NOMLE   FE | A0A2I3HAC | A0A2I3HAC   | Serum amyloid A protein                          |
| NOMLE   FE | A0A2I3HAC | A0A2I3HAC   | Serum amyloid A protein                          |
| NOMLE   FE | A0A2I3HAC | A0A2I3HAC   | Serum amyloid A protein                          |
| NOMLE   FE | A0A2I3HAC | A0A2I3HAC   | Serum amyloid A protein                          |
| NOMLE   FE | A0A2I3HAC | A0A2I3HAC   | Serum amyloid A protein                          |
| NOMLE   FE | A0A2I3HAC | A0A2I3HAC   | Serum amyloid A protein                          |
| NOMLE   FE | A0A2I3HAC | A0A2I3HAC   | Serum amyloid A protein                          |
| NOMLE   FE | A0A2I3HAC | A0A2I3HAC   | Serum amyloid A protein                          |
| NOMLE   FE | A0A2I3HAC | A0A2I3HAC   | Serum amyloid A protein                          |
| NOMLE   FE | A0A2I3HAC | A0A2I3HAC   | Serum amyloid A protein                          |
| NOMLE   FE | A0A2I3HAC | A0A2I3HAC   | Serum amyloid A protein                          |
| NOMLE   FE | A0A2I3HAC | A0A2I3HAC   | Serum amyloid A protein                          |
| NOMLE   FE | A0A2I3HAC | A0A2I3HAC   | Serum amyloid A protein                          |
| NOMLE   FE | A0A2I3HAC | A0A2I3HAC   | Serum amyloid A protein                          |
| NOMLE   FE | A0A2I3HAC | A0A2I3HAC   | Serum amyloid A protein                          |
| NOMLE   FE | A0A2I3HAC | A0A2I3HAC   | Serum amyloid A protein                          |
| NOMLE   FE | A0A2I3HAC | A0A2I3HAC   | Serum amyloid A protein                          |
| NOMLE   FE | A0A2I3HAC | A0A2I3HAC   | Serum amyloid A protein                          |
| NOMLE   FE | A0A2I3HAC | A0A2I3HAC   | Serum amyloid A protein                          |
| HORSE      | F7BBH8    | F7BBH8   F7 | Serum amyloid A protein                          |
| FELCA      | Q5XXW0    | Q5XXW0   C  | Serum amyloid A protein (Fragment)               |







|       |        |        |                            |
|-------|--------|--------|----------------------------|
| HORSE | F6ZPQ6 | F6ZPQ6 | F7 Serum amyloid A protein |
| HORSE | F6ZPQ6 | F6ZPQ6 | Serum amyloid A protein    |
| HORSE | F6ZPQ6 | F6ZPQ6 | F7 Serum amyloid A protein |
| HORSE | F6ZPQ6 | F6ZPQ6 | F7 Serum amyloid A protein |
| HORSE | F6ZPQ6 | F6ZPQ6 | F7 Serum amyloid A protein |
| HORSE | F6ZPQ6 | F6ZPQ6 | F7 Serum amyloid A protein |
| HORSE | F7C0Y4 | F7C0Y4 | Serum amyloid A protein    |
| HORSE | F7C0Y4 | F7C0Y4 | Serum amyloid A protein    |
| HORSE | F7C0Y4 | F7C0Y4 | Serum amyloid A protein    |
| HORSE | F7C0Y4 | F7C0Y4 | Serum amyloid A protein    |
| HORSE | F7C0Y4 | F7C0Y4 | Serum amyloid A protein    |
| HORSE | F7C0Y4 | F7C0Y4 | Serum amyloid A protein    |

|          |           |           |                            |
|----------|-----------|-----------|----------------------------|
| CANLF    | A0A5F4D1f | A0A5F4D1f | Serum amyloid A protein    |
| RABIT    | P22000    | P22000    | Serum amyloid A-2 protein  |
| ORENI    | I3JND5    | I3JND5    | Serum amyloid A-like 1     |
| HORSE    | A0A5F5Q0I | A0A5F5Q0I | Serum amyloid A protein    |
| ORYLA    | H2LN91    | H2LN91    | A(Serum amyloid A-like 1   |
| HORSE    | F7BBH8    | F7BBH8    | F6 Serum amyloid A protein |
| HORSE    | F7BBH8    | F7BBH8    | F6 Serum amyloid A protein |
| HORSE    | F7BBH8    | F7BBH8    | F6 Serum amyloid A protein |
| HORSE    | F7BBH8    | F7BBH8    | F6 Serum amyloid A protein |
| HORSE    | F7BBH8    | F7BBH8    | F6 Serum amyloid A protein |
| HORSE    | F7BBH8    | F7BBH8    | F6 Serum amyloid A protein |
| HORSE    | F7BBH8    | F7BBH8    | F6 Serum amyloid A protein |
| HORSE    | F7BBH8    | F7BBH8    | F6 Serum amyloid A protein |
| HORSE    | F7BBH8    | F7BBH8    | F6 Serum amyloid A protein |
| HORSE    | F7BBH8    | F7BBH8    | F6 Serum amyloid A protein |
| HORSE    | F7BBH8    | F7BBH8    | F6 Serum amyloid A protein |
| HORSE    | F7BBH8    | F7BBH8    | F6 Serum amyloid A protein |
| HORSE    | F7BBH8    | F7BBH8    | F6 Serum amyloid A protein |
| HORSE    | F7BBH8    | F7BBH8    | F6 Serum amyloid A protein |
| HORSE    | F7BBH8    | F7BBH8    | F6 Serum amyloid A protein |
| HORSE    | F7BBH8    | F7BBH8    | F6 Serum amyloid A protein |
| HORSE    | F7BBH8    | F7BBH8    | F6 Serum amyloid A protein |
| HORSE    | F7BBH8    | F7BBH8    | F6 Serum amyloid A protein |
| ARAVE    | A0A4Y2H1f | A0A4Y2H1f | Serum amyloid A protein    |
| NOMLE    | A0A2I3HAC | A0A2I3HAC | Serum amyloid A protein    |
| RUPRU CA | E1UYU4    | E1UYU4    | B(Serum amyloid A protein  |
| HORSE    | F7BBH8    | F7BBH8    | F6 Serum amyloid A protein |
| FELCA    | A0A337SUf | A0A337SUf | Serum amyloid A protein    |
| FELCA    | A0A337SUf | A0A337SUf | Serum amyloid A protein    |
| TAKRU    | H2V509    | H2V509    | Serum amyloid A protein    |
| MONDO    | F7FFU5    | F7FFU5    | Serum amyloid A like 1     |
| MONDO    | F7FFU5    | F7FFU5    | Serum amyloid A like 1     |
| MONDO    | F7FFU5    | F7FFU5    | Serum amyloid A like 1     |
| MONDO    | F7FFU5    | F7FFU5    | Serum amyloid A like 1     |
| ORYLA    | H2LN91    | H2LN91    | A(Serum amyloid A-like 1   |











|            |          |          |                            |
|------------|----------|----------|----------------------------|
| MUSPF CA   | M3YQK5   | M3YQK5   | A Serum amyloid A like 1   |
| MUSPF CA   | M3YQK5   | M3YQK5   | A Serum amyloid A like 1   |
| MUSPF CA   | M3YQK5   | M3YQK5   | A Serum amyloid A like 1   |
| MUSPF CA   | M3YQK5   | M3YQK5   | A Serum amyloid A like 1   |
| MUSPF CA   | M3YQK5   | M3YQK5   | A Serum amyloid A like 1   |
| MUSPF CA   | M3YQK5   | M3YQK5   | A Serum amyloid A like 1   |
| MUSPF CA   | M3YQK5   | M3YQK5   | A Serum amyloid A like 1   |
| MUSPF CA   | M3YQK5   | M3YQK5   | A Serum amyloid A like 1   |
| MUSPF CA   | M3YQK5   | M3YQK5   | A Serum amyloid A like 1   |
| MUSPF CA   | M3YQK5   | M3YQK5   | A Serum amyloid A like 1   |
| MUSPF CA   | M3YQK5   | M3YQK5   | A Serum amyloid A like 1   |
| FELCA CAN  | M3VUA7   | M3VUA7   | J Serum amyloid A like 1   |
| FELCA CAN  | M3VUA7   | M3VUA7   | J Serum amyloid A like 1   |
| FELCA CAN  | M3VUA7   | M3VUA7   | J Serum amyloid A like 1   |
| FELCA CAN  | M3VUA7   | M3VUA7   | J Serum amyloid A like 1   |
| FELCA CAN  | M3VUA7   | M3VUA7   | J Serum amyloid A like 1   |
| FELCA CAN  | M3VUA7   | M3VUA7   | J Serum amyloid A like 1   |
| FELCA CAN  | M3VUA7   | M3VUA7   | J Serum amyloid A like 1   |
| FELCA CAN  | M3VUA7   | M3VUA7   | J Serum amyloid A like 1   |
| FELCA CAN  | M3VUA7   | M3VUA7   | J Serum amyloid A like 1   |
| FELCA CAN  | M3VUA7   | M3VUA7   | J Serum amyloid A like 1   |
| FELCA CAN  | M3VUA7   | M3VUA7   | J Serum amyloid A like 1   |
| FELCA CAN  | M3VUA7   | M3VUA7   | J Serum amyloid A like 1   |
| FELCA CAN  | M3VUA7   | M3VUA7   | J Serum amyloid A like 1   |
| FELCA CAN  | M3VUA7   | M3VUA7   | J Serum amyloid A like 1   |
| FELCA CAN  | M3VUA7   | M3VUA7   | J Serum amyloid A like 1   |
| PANTR HU   | H2R5J4   | H2R5J4   | J3I Serum amyloid A like 1 |
| ORNAN      | F6QGS9   | F6QGS9   | Serum amyloid A like 1     |
| PIG SAIBB  | A0A5G2QN | A0A5G2QN | Serum amyloid A like 1     |
| PIG        | A0A480KN | A0A480KN | Serum amyloid A protein    |
| SARHA      | G3WV59   | G3WV59   | Serum amyloid A like 1     |
| SARHA      | G3WV59   | G3WV59   | Serum amyloid A like 1     |
| PIG        | F1S9B2   | F1S9B2   | Serum amyloid A like 1     |
| PIG        | F1S9B2   | F1S9B2   | Serum amyloid A like 1     |
| PIG        | F1S9B2   | F1S9B2   | Serum amyloid A like 1     |
| PIG        | F1S9B2   | F1S9B2   | Serum amyloid A like 1     |
| PIG        | F1S9B2   | F1S9B2   | Serum amyloid A like 1     |
| NOMLE      | G1S7R0   | G1S7R0   | Serum amyloid A protein    |
| PANTA FEL  | T1W3H8   | T1W3H8   | C Serum amyloid A protein  |
| BOBOX      | A0A4W2BS | A0A4W2BS | Serum amyloid A like 1     |
| BOBOX      | A0A4W2BS | A0A4W2BS | Serum amyloid A like 1     |
| RABIT      | P35543   | P35543   | Serum amyloid A-3 protein  |
| RABIT      | P35543   | P35543   | Serum amyloid A-3 protein  |
| RABIT      | P35543   | P35543   | Serum amyloid A-3 protein  |
| PAPAN M/   | A0A2I3MZ | A0A2I3MZ | Serum amyloid A like 1     |
| PAPAN M/   | A0A2I3MZ | A0A2I3MZ | Serum amyloid A like 1     |
| RAT        | Q5M878   | Q5M878   | Serum amyloid A protein    |
| CEBCA AO   | A0A2K5QF | A0A2K5QF | Serum amyloid A like 1     |
| RHIRO PRC  | A0A2K6Q6 | A0A2K6Q6 | Serum amyloid A like 1     |
| SAIBB RHIF | A0A2K6RY | A0A2K6RY | Serum amyloid A like 1     |

SAIBB|RHIF A0A2K6RY\ A0A2K6RY\ Serum amyloid A like 1  
SAIBB|RHIF A0A2K6RY\ A0A2K6RY\ Serum amyloid A like 1  
RABIT P35543 P35543 Serum amyloid A-3 protein  
BUBBU|BO D2U6Q0 D2U6Q0|V Serum amyloid A protein (Fragment)  
MANLE|CE A0A2K5XIC A0A2K5XIC Serum amyloid A like 1  
CAVPO H0V714 H0V714 Serum amyloid A like 1  
CAVPO H0V714 H0V714 Serum amyloid A like 1  
URSMA|UF A0A452VG A0A452VG Serum amyloid A like 1  
PIG A0A5G2QN A0A5G2QN Serum amyloid A like 1  
PIG A0A5G2QN A0A5G2QN Serum amyloid A like 1  
PIG A0A5G2QN A0A5G2QN Serum amyloid A like 1  
PIG A0A287AI4 A0A287AI4 Serum amyloid A like 1  
PIG A0A287A4I A0A287A4I Serum amyloid A like 1  
RABIT A0A5F9DS\ A0A5F9DS\ Serum amyloid A like 1  
RABIT G1SHI3 G1SHI3 Serum amyloid A like 1  
ICTTR I3M295 I3M295 Serum amyloid A like 1  
MOUSE P04918 P04918 Serum amyloid A-3 protein  
9TELE|NOT A0A1A8BD A0A1A8BD Serum amyloid A protein  
SAIBB|RHIF A0A2K6RY\ A0A2K6RY\ Serum amyloid A like 1  
SAIBB|RHIF A0A2K6RY\ A0A2K6RY\ Serum amyloid A like 1  
RHIBE|PAP A0A2K6KSF A0A2K6KSF Serum amyloid A like 1  
SAIBB A0A2K6RY\ A0A2K6RY\ Serum amyloid A like 1  
SAIBB A0A2K6RY\ A0A2K6RY\ Serum amyloid A like 1  
HORSE A0A5F5Q4I A0A5F5Q4I Serum amyloid A like 1  
PROCO|ICT A0A2K6ETL A0A2K6ETL Serum amyloid A like 1  
MYOLU G1PAL8 G1PAL8 Serum amyloid A like 1  
MYOLU G1PAL8 G1PAL8 Serum amyloid A like 1  
FELCA M3VUA7 M3VUA7 Serum amyloid A like 1





|           |           |           |                            |
|-----------|-----------|-----------|----------------------------|
| HORSE     | F7BBH8    | F7BBH8    | F6 Serum amyloid A protein |
| PIG RABIT | F1S9B2    | F1S9B2    | A0 Serum amyloid A like 1  |
| NEOVI     | P18575    | P18575    | Serum amyloid A-1 protein  |
| NEOVI     | P18575    | P18575    | Serum amyloid A-1 protein  |
| NEOVI     | P18575    | P18575    | Serum amyloid A-1 protein  |
| NEOVI     | P18575    | P18575    | Serum amyloid A-1 protein  |
| NEOVI     | P18575    | P18575    | Serum amyloid A-1 protein  |
| NEOVI     | P18575    | P18575    | Serum amyloid A-1 protein  |
| NEOVI     | P18575    | P18575    | Serum amyloid A-1 protein  |
| NEOVI     | P18575    | P18575    | Serum amyloid A-1 protein  |
| NEOVI     | P18575    | P18575    | Serum amyloid A-1 protein  |
| VULVU NE  | A0A3Q7RF  | A0A3Q7RF  | Serum amyloid A protein    |
| VULVU NE  | A0A3Q7RF  | A0A3Q7RF  | Serum amyloid A protein    |
| VULVU NE  | A0A3Q7RF  | A0A3Q7RF  | Serum amyloid A protein    |
| VULVU NE  | A0A3Q7RF  | A0A3Q7RF  | Serum amyloid A protein    |
| VULVU NE  | A0A3Q7RF  | A0A3Q7RF  | Serum amyloid A protein    |
| VULVU NE  | A0A3Q7RF  | A0A3Q7RF  | Serum amyloid A protein    |
| VULVU NE  | A0A3Q7RF  | A0A3Q7RF  | Serum amyloid A protein    |
| VULVU NE  | A0A3Q7RF  | A0A3Q7RF  | Serum amyloid A protein    |
| VULVU NE  | A0A3Q7RF  | A0A3Q7RF  | Serum amyloid A protein    |
| VULVU NE  | A0A3Q7RF  | A0A3Q7RF  | Serum amyloid A protein    |
| VULVU NE  | A0A3Q7RF  | A0A3Q7RF  | Serum amyloid A protein    |
| VULVU NE  | A0A3Q7RF  | A0A3Q7RF  | Serum amyloid A protein    |
| VULVU NE  | A0A3Q7RF  | A0A3Q7RF  | Serum amyloid A protein    |
| VULVU NE  | A0A3Q7RF  | A0A3Q7RF  | Serum amyloid A protein    |
| VULVU NE  | A0A3Q7RF  | A0A3Q7RF  | Serum amyloid A protein    |
| VULVU NE  | A0A3Q7RF  | A0A3Q7RF  | Serum amyloid A protein    |
| VULVU NE  | A0A3Q7RF  | A0A3Q7RF  | Serum amyloid A protein    |
| VULVU NE  | A0A3Q7RF  | A0A3Q7RF  | Serum amyloid A protein    |
| VULVU NE  | A0A3Q7RF  | A0A3Q7RF  | Serum amyloid A protein    |
| CANLF     | P19708    | P19708    | Serum amyloid A protein    |
| CANLF     | P19708    | P19708    | Serum amyloid A protein    |
| CANLF     | A0A096P6  | A0A096P6  | Serum amyloid A protein    |
| CANLF     | A0A096P6  | A0A096P6  | Serum amyloid A protein    |
| CANLF     | A0A5F4BZ  | A0A5F4BZ  | Serum amyloid A protein    |
| SAIBB     | A0A2K6RY  | A0A2K6RY  | Serum amyloid A like 1     |
| SAIBB     | A0A2K6RY  | A0A2K6RY  | Serum amyloid A like 1     |
| ORYLA     | H2LN91    | H2LN91    | A Serum amyloid A-like 1   |
| PANTR     | H2Q392    | H2Q392    | Serum amyloid A protein    |
| TAKRU     | H2V509    | H2V509    | Serum amyloid A protein    |
| PROCO     | A0A2K6ETL | A0A2K6ETL | Serum amyloid A like 1     |
| OTOGA     | H0X4B8    | H0X4B8    | Serum amyloid A like 1     |
| LATCH     | H3AUK4    | H3AUK4    | Serum amyloid A like 1     |
| LATCH     | H3AUK4    | H3AUK4    | Serum amyloid A like 1     |
| LATCH     | H3AUK4    | H3AUK4    | Serum amyloid A like 1     |
| URSMA UF  | A0A452VG  | A0A452VG  | Serum amyloid A like 1     |
| URSMA UF  | A0A452VG  | A0A452VG  | Serum amyloid A like 1     |
| MONDO     | F7FFU5    | F7FFU5    | Serum amyloid A like 1     |
| MYOLU     | G1PAL8    | G1PAL8    | Serum amyloid A like 1     |
| MYOLU     | G1PAL8    | G1PAL8    | Serum amyloid A like 1     |

|           |           |           |                                       |
|-----------|-----------|-----------|---------------------------------------|
| MYOLU     | G1PAL8    | G1PAL8    | Serum amyloid A like 1                |
| MYOLU     | G1PAL8    | G1PAL8    | Serum amyloid A like 1                |
| MYOLU     | G1PAL8    | G1PAL8    | Serum amyloid A like 1                |
| MYOLU     | G1PAL8    | G1PAL8    | Serum amyloid A like 1                |
| MYOLU     | G1PAL8    | G1PAL8    | Serum amyloid A like 1                |
| MYOLU     | G1PAL8    | G1PAL8    | Serum amyloid A like 1                |
| MYOLU     | G1PAL8    | G1PAL8    | Serum amyloid A like 1                |
| MYOLU     | G1PAL8    | G1PAL8    | Serum amyloid A like 1                |
| MYOLU     | G1PAL8    | G1PAL8    | Serum amyloid A like 1                |
| RABIT     | A0A5F9DS  | A0A5F9DS  | Serum amyloid A like 1                |
| NOMLE     | G1S7Q7    | G1S7Q7    | Serum amyloid A like 1                |
| NOMLE     | G1S7Q7    | G1S7Q7    | Serum amyloid A like 1                |
| LATCH     | H3AUK4    | H3AUK4    | Serum amyloid A like 1                |
| LATCH     | H3AUK4    | H3AUK4    | Serum amyloid A like 1                |
| LATCH     | H3AUK4    | H3AUK4    | Serum amyloid A like 1                |
| LATCH     | H3AUK4    | H3AUK4    | Serum amyloid A like 1                |
| NOTKU     | A0A1A8KK  | A0A1A8KK  | Serum amyloid A protein               |
| NOTKU     | A0A1A8KK  | A0A1A8KK  | Serum amyloid A protein               |
| NOTKU     | A0A1A8KK  | A0A1A8KK  | Serum amyloid A protein               |
| 9TELE     | A0A1A8G3  | A0A1A8G3  | Serum amyloid A-like 1                |
| MYOLU     | G1PAL8    | G1PAL8    | Serum amyloid A like 1                |
| MYOLU     | G1PAL8    | G1PAL8    | Serum amyloid A like 1                |
| MYOLU     | G1PAL8    | G1PAL8    | Serum amyloid A like 1                |
| MYOLU     | G1PAL8    | G1PAL8    | Serum amyloid A like 1                |
| MYOLU     | G1PAL8    | G1PAL8    | Serum amyloid A like 1                |
| MYOLU     | G1PAL8    | G1PAL8    | Serum amyloid A like 1                |
| SARHA     | G3WV59    | G3WV59    | Serum amyloid A like 1                |
| PIG       | F1S9B2    | F1S9B2    | Serum amyloid A like 1                |
| PIG       | F1S9B2    | F1S9B2    | Serum amyloid A like 1                |
| PIG       | F1S9B2    | F1S9B2    | Serum amyloid A like 1                |
| PIG       | F1S9B2    | F1S9B2    | Serum amyloid A like 1                |
| MESAU     | P20727    | P20727    | P2 Serum amyloid A-2 protein          |
| CAPHI BOV | A0A452EM  | A0A452EM  | Serum amyloid A like 1                |
| BOVIN     | B8Y7I4    | B8Y7I4    | A0 Serum amyloid A protein (Fragment) |
| TAKRU     | H2U9W6    | H2U9W6    | Serum amyloid A-like 1                |
| TAKRU     | H2U9W6    | H2U9W6    | Serum amyloid A-like 1                |
| ORNAN     | F6QGS9    | F6QGS9    | Serum amyloid A like 1                |
| 9TELE     | A0A1A7WC  | A0A1A7WC  | Serum amyloid A-like 1                |
| NOMLE     | A0A2I3HAC | A0A2I3HAC | Serum amyloid A protein               |
| NOMLE     | A0A2I3HAC | A0A2I3HAC | Serum amyloid A protein               |
| PANTR NO  | A0A2I3TSR | A0A2I3TSR | Serum amyloid A protein               |
| NOMLE     | A0A2I3HAC | A0A2I3HAC | Serum amyloid A protein               |
| PIG OTOG  | A0A5G2QN  | A0A5G2QN  | Serum amyloid A like 1                |
| URSMA UF  | A0A452VG  | A0A452VG  | Serum amyloid A like 1                |
| URSMA UF  | A0A452VG  | A0A452VG  | Serum amyloid A like 1                |
| URSMA UF  | A0A452VG  | A0A452VG  | Serum amyloid A like 1                |
| URSMA UF  | A0A452VG  | A0A452VG  | Serum amyloid A like 1                |



















|           |           |           |                         |
|-----------|-----------|-----------|-------------------------|
| HORSE     | P19857    | P19857    | Serum amyloid A protein |
| HORSE     | P19857    | P19857    | Serum amyloid A protein |
| HORSE     | P19857    | P19857    | Serum amyloid A protein |
| HORSE     | P19857    | P19857    | Serum amyloid A protein |
| HORSE     | P19857    | P19857    | Serum amyloid A protein |
| HORSE     | P19857    | P19857    | Serum amyloid A protein |
| HORSE     | P19857    | P19857    | Serum amyloid A protein |
| HORSE     | P19857    | P19857    | Serum amyloid A protein |
| HORSE     | P19857    | P19857    | Serum amyloid A protein |
| HORSE     | P19857    | P19857    | Serum amyloid A protein |
| HORSE     | P19857    | P19857    | Serum amyloid A protein |
| HORSE     | P19857    | P19857    | Serum amyloid A protein |
| HORSE     | P19857    | P19857    | Serum amyloid A protein |
| HORSE     | P19857    | P19857    | Serum amyloid A protein |
| HORSE     | P19857    | P19857    | Serum amyloid A protein |
| HORSE     | P19857    | P19857    | Serum amyloid A protein |
| HORSE     | P19857    | P19857    | Serum amyloid A protein |
| HORSE     | P19857    | P19857    | Serum amyloid A protein |
| HORSE     | P19857    | P19857    | Serum amyloid A protein |
| HORSE     | P19857    | P19857    | Serum amyloid A protein |
| HORSE     | P19857    | P19857    | Serum amyloid A protein |
| HORSE     | P19857    | P19857    | Serum amyloid A protein |
| HORSE     | P19857    | P19857    | Serum amyloid A protein |
| HORSE     | P19857    | P19857    | Serum amyloid A protein |
| HORSE     | P19857    | P19857    | Serum amyloid A protein |
| HORSE     | P19857    | P19857    | Serum amyloid A protein |
| HORSE     | P19857    | P19857    | Serum amyloid A protein |
| HORSE     | P19857    | P19857    | Serum amyloid A protein |
| HORSE     | P19857    | P19857    | Serum amyloid A protein |
| HORSE     | P19857    | P19857    | Serum amyloid A protein |
| HORSE     | P19857    | P19857    | Serum amyloid A protein |
| HORSE     | P19857    | P19857    | Serum amyloid A protein |
| HORSE     | P19857    | P19857    | Serum amyloid A protein |
| HORSE     | P19857    | P19857    | Serum amyloid A protein |
| HORSE     | P19857    | P19857    | Serum amyloid A protein |
| HORSE     | P19857    | P19857    | Serum amyloid A protein |
| HORSE     | P19857    | P19857    | Serum amyloid A protein |
| HORSE     | P19857    | P19857    | Serum amyloid A protein |
| HORSE     | P19857    | P19857    | Serum amyloid A protein |
| HORSE     | P19857    | P19857    | Serum amyloid A protein |
| HORSE     | P19857    | P19857    | Serum amyloid A protein |
| HORSE     | P19857    | P19857    | Serum amyloid A protein |
| HORSE     | P19857    | P19857    | Serum amyloid A protein |
| HORSE     | P19857    | P19857    | Serum amyloid A protein |
| LATCH     | H3AUK4    | H3AUK4    | Serum amyloid A like 1  |
| PANTR PAI | A0A2I3TSR | A0A2I3TSR | Serum amyloid A protein |
| NOMLE M.  | G1S7R0    | G1S7R0 G. | Serum amyloid A protein |
| NOMLE M.  | A0A2I3HAC | A0A2I3HAC | Serum amyloid A protein |
| MACMU     | F7CLU1    | F7CLU1 F6 | Serum amyloid A protein |
| MACMU     | F7CLU1    | F7CLU1 F6 | Serum amyloid A protein |
| MACMU     | F7CLU1    | F7CLU1 F6 | Serum amyloid A protein |
| MACMU     | F7CLU1    | F7CLU1 F6 | Serum amyloid A protein |
| MACMU     | F7CLU1    | F7CLU1 F6 | Serum amyloid A protein |
| PANTR PAI | A0A2I3TSR | A0A2I3TSR | Serum amyloid A protein |
| MACNP     | A0A515EIR | A0A515EIR | Serum amyloid A         |
| MACNP     | A0A515EIR | A0A515EIR | Serum amyloid A         |
| VULVU     | A0A3Q7RF  | A0A3Q7RF  | Serum amyloid A protein |
| VULVU     | A0A3Q7RF  | A0A3Q7RF  | Serum amyloid A protein |
| VULVU     | A0A3Q7RF  | A0A3Q7RF  | Serum amyloid A protein |
| 9TELE     | A0A1A7WC  | A0A1A7WC  | Serum amyloid A-like 1  |
| 9TELE     | A0A1A8CL  | A0A1A8CL  | Serum amyloid A-like 1  |
| MONDO     | F7FFU5    | F7FFU5    | Serum amyloid A like 1  |
| SARHA     | G3WV59    | G3WV59    | Serum amyloid A like 1  |

|          |           |           |                           |
|----------|-----------|-----------|---------------------------|
| CAVPO    | H0V714    | H0V714    | Serum amyloid A like 1    |
| MUSPF    | M3YQK5    | M3YQK5    | Serum amyloid A like 1    |
| MUSPF    | M3YQK5    | M3YQK5    | Serum amyloid A like 1    |
| MUSPF    | M3YQK5    | M3YQK5    | Serum amyloid A like 1    |
| MUSPF    | M3YQK5    | M3YQK5    | Serum amyloid A like 1    |
| MUSPF    | M3YQK5    | M3YQK5    | Serum amyloid A like 1    |
| MUSPF    | M3YQK5    | M3YQK5    | Serum amyloid A like 1    |
| MUSPF    | M3YQK5    | M3YQK5    | Serum amyloid A like 1    |
| MUSPF    | M3YQK5    | M3YQK5    | Serum amyloid A like 1    |
| MUSPF    | M3YQK5    | M3YQK5    | Serum amyloid A like 1    |
| URSMA UF | A0A452VG  | A0A452VG  | Serum amyloid A like 1    |
| URSMA UF | A0A452VG  | A0A452VG  | Serum amyloid A like 1    |
| URSMA UF | A0A452VG  | A0A452VG  | Serum amyloid A like 1    |
| CAPHI    | A0A452EM  | A0A452EM  | Serum amyloid A like 1    |
| RABIT    | A0A5F9DS  | A0A5F9DS  | Serum amyloid A like 1    |
| PANTR NO | A0A2I3TSR | A0A2I3TSR | Serum amyloid A protein   |
| FELCA    | A0A337SU  | A0A337SU  | Serum amyloid A protein   |
| CEBCA    | A0A2K5QF  | A0A2K5QF  | Serum amyloid A like 1    |
| MACEU    | P53613    | P53613    | Serum amyloid A protein   |
| MACEU    | P53613    | P53613    | Serum amyloid A protein   |
| MOUSE    | A0A1B0GT  | A0A1B0GT  | Serum amyloid A-3 protein |
| MOUSE    | A0A1B0GT  | A0A1B0GT  | Serum amyloid A-3 protein |
| MOUSE    | A0A1B0GT  | A0A1B0GT  | Serum amyloid A-3 protein |
| MOUSE    | A0A1B0GT  | A0A1B0GT  | Serum amyloid A-3 protein |
| MOUSE    | A0A1B0GT  | A0A1B0GT  | Serum amyloid A-3 protein |
| MOUSE    | A0A1B0GT  | A0A1B0GT  | Serum amyloid A-3 protein |
| HORSE    | F6PJF6    | F6PJF6    | Serum amyloid A protein   |
| CAPHI    | Q0PG40    | Q0PG40    | Serum amyloid A protein   |
| RABIT    | A0A5F9DS  | A0A5F9DS  | Serum amyloid A like 1    |
| NOMLE    | G1S7Q7    | G1S7Q7    | Serum amyloid A like 1    |
| NOMLE    | G1S7Q7    | G1S7Q7    | Serum amyloid A like 1    |
| NOMLE    | G1S7Q7    | G1S7Q7    | Serum amyloid A like 1    |
| NOMLE    | G1S7Q7    | G1S7Q7    | Serum amyloid A like 1    |
| NOMLE    | G1S7Q7    | G1S7Q7    | Serum amyloid A like 1    |
| PROCO    | A0A2K6ETL | A0A2K6ETL | Serum amyloid A like 1    |
| PROCO    | A0A2K6ETL | A0A2K6ETL | Serum amyloid A like 1    |
| PROCO    | A0A2K6ETL | A0A2K6ETL | Serum amyloid A like 1    |
| PROCO    | A0A2K6ETL | A0A2K6ETL | Serum amyloid A like 1    |
| PROCO    | A0A2K6ETL | A0A2K6ETL | Serum amyloid A like 1    |
| PROCO    | A0A2K6ETL | A0A2K6ETL | Serum amyloid A like 1    |
| MACMU    | A0A1D5QY  | A0A1D5QY  | Serum amyloid A like 1    |
| RABIT    | G1SHI3    | G1SHI3    | Serum amyloid A like 1    |
| 9TELE    | A0A1A7WC  | A0A1A7WC  | Serum amyloid A-like 1    |
| 9TELE    | A0A1A7WC  | A0A1A7WC  | Serum amyloid A-like 1    |
| HORSE    | A0A5F5Q0I | A0A5F5Q0I | Serum amyloid A protein   |
| HORSE    | A0A5F5Q0I | A0A5F5Q0I | Serum amyloid A protein   |
| HORSE    | A0A5F5Q0I | A0A5F5Q0I | Serum amyloid A protein   |

|          |           |            |                           |
|----------|-----------|------------|---------------------------|
| HORSE    | A0A5F5Q0I | A0A5F5Q0I  | Serum amyloid A protein   |
| HORSE    | A0A5F5Q0I | A0A5F5Q0I  | Serum amyloid A protein   |
| HORSE    | A0A5F5Q0I | A0A5F5Q0I  | Serum amyloid A protein   |
| HORSE    | A0A5F5Q0I | A0A5F5Q0I  | Serum amyloid A protein   |
| HORSE    | A0A5F5Q0I | A0A5F5Q0I  | Serum amyloid A protein   |
| RABIT    | P35543    | P35543     | Serum amyloid A-3 protein |
| RABIT    | P35543    | P35543     | Serum amyloid A-3 protein |
| RABIT    | P35543    | P35543     | Serum amyloid A-3 protein |
| HORSE    | F6ZL17    | F6ZL17 F7I | Serum amyloid A protein   |
| HORSE    | F6ZL17    | F6ZL17 F7I | Serum amyloid A protein   |
| HORSE    | F6ZL17    | F6ZL17 F7I | Serum amyloid A protein   |
| HORSE    | F6ZL17    | F6ZL17 F7I | Serum amyloid A protein   |
| CAVPO    | H0V714    | H0V714     | Serum amyloid A like 1    |
| PIG      | A0A5G2QN  | A0A5G2QN   | Serum amyloid A like 1    |
| OTOGA    | H0X4B8    | H0X4B8     | Serum amyloid A like 1    |
| URSMA UF | A0A452VG  | A0A452VG   | Serum amyloid A like 1    |
| PIG      | Q2HXZ9    | Q2HXZ9     | Serum amyloid A protein   |
| HUMAN    | A0A0D5ZZZ | A0A0D5ZZZ  | Serum amyloid A protein   |
| 9TELE    | A0A1A8S3Z | A0A1A8S3Z  | Serum amyloid A-like 1    |
| 9TELE    | A0A1A8S3Z | A0A1A8S3Z  | Serum amyloid A-like 1    |
| 9TELE    | A0A1A8S3Z | A0A1A8S3Z  | Serum amyloid A-like 1    |
| 9TELE    | A0A1A8S3Z | A0A1A8S3Z  | Serum amyloid A-like 1    |
| 9TELE    | A0A1A8S3Z | A0A1A8S3Z  | Serum amyloid A-like 1    |
| TAKRU OR | H2U9W6    | H2U9W6 F   | Serum amyloid A-like 1    |
| TAKRU OR | H2U9W6    | H2U9W6 F   | Serum amyloid A-like 1    |
| TAKRU OR | H2U9W6    | H2U9W6 F   | Serum amyloid A-like 1    |
| TAKRU OR | H2U9W6    | H2U9W6 F   | Serum amyloid A-like 1    |
| TAKRU OR | H2U9W6    | H2U9W6 F   | Serum amyloid A-like 1    |
| COLLI    | A0A2I0MH  | A0A2I0MH   | Serum amyloid A-like 1    |
| COLLI    | A0A2I0MH  | A0A2I0MH   | Serum amyloid A-like 1    |
| COLLI    | A0A2I0MH  | A0A2I0MH   | Serum amyloid A-like 1    |
| PIG      | F1S9B3    | F1S9B3     | Serum amyloid A like 1    |
| PIG      | F1S9B3    | F1S9B3     | Serum amyloid A like 1    |
| PIG      | F1S9B3    | F1S9B3     | Serum amyloid A like 1    |
| PIG      | F1S9B3    | F1S9B3     | Serum amyloid A like 1    |
| PIG      | F1S9B3    | F1S9B3     | Serum amyloid A like 1    |
| PIG      | F1S9B3    | F1S9B3     | Serum amyloid A like 1    |
| PIG      | F1S9B3    | F1S9B3     | Serum amyloid A like 1    |
| PIG      | F1S9B3    | F1S9B3     | Serum amyloid A like 1    |
| PIG      | F1S9B3    | F1S9B3     | Serum amyloid A like 1    |
| PIG      | F1S9B3    | F1S9B3     | Serum amyloid A like 1    |
| MACNP    | A0A515EIR | A0A515EIR  | Serum amyloid A           |
| MACNP    | A0A515EIR | A0A515EIR  | Serum amyloid A           |
| MACNP    | A0A515EIR | A0A515EIR  | Serum amyloid A           |
| MACNP    | A0A515EIR | A0A515EIR  | Serum amyloid A           |
| MACNP    | A0A515EIR | A0A515EIR  | Serum amyloid A           |

|           |           |           |                           |
|-----------|-----------|-----------|---------------------------|
| MACNP     | A0A515EIR | A0A515EIR | Serum amyloid A           |
| ORYLA     | H2LN91    | H2LN91 A  | Serum amyloid A-like 1    |
| SARHA     | G3WV59    | G3WV59    | Serum amyloid A like 1    |
| MESAU     | P20727    | P20727    | Serum amyloid A-2 protein |
| CALJA     | F6ZH70    | F6ZH70 U  | Serum amyloid A protein   |
| CALJA     | F6ZH70    | F6ZH70 U  | Serum amyloid A protein   |
| CALJA     | F6ZH70    | F6ZH70 U  | Serum amyloid A protein   |
| CALJA     | F6ZH70    | F6ZH70 U  | Serum amyloid A protein   |
| CALJA     | F6ZH70    | F6ZH70 U  | Serum amyloid A protein   |
| CALJA     | F6ZH70    | F6ZH70 U  | Serum amyloid A protein   |
| CALJA     | F6ZH70    | F6ZH70 U  | Serum amyloid A protein   |
| CALJA     | F6ZH70    | F6ZH70 U  | Serum amyloid A protein   |
| CALJA     | F6ZH70    | F6ZH70 U  | Serum amyloid A protein   |
| CALJA     | F6ZH70    | F6ZH70 U  | Serum amyloid A protein   |
| CALJA     | F6ZH70    | F6ZH70 U  | Serum amyloid A protein   |
| CALJA     | F6ZH70    | F6ZH70 U  | Serum amyloid A protein   |
| CALJA     | F6ZH70    | F6ZH70 U  | Serum amyloid A protein   |
| CALJA     | F6ZH70    | F6ZH70 U  | Serum amyloid A protein   |
| CALJA     | F6ZH70    | F6ZH70 U  | Serum amyloid A protein   |
| CALJA     | F6ZH70    | F6ZH70 U  | Serum amyloid A protein   |
| CALJA     | F6ZH70    | F6ZH70 U  | Serum amyloid A protein   |
| CALJA     | F6ZH70    | F6ZH70 U  | Serum amyloid A protein   |
| CALJA     | F6ZH70    | F6ZH70 U  | Serum amyloid A protein   |
| CALJA     | F6ZH70    | F6ZH70 U  | Serum amyloid A protein   |
| HORSE     | F6ZL17    | F6ZL17 F7 | Serum amyloid A protein   |
| HORSE     | F6ZL17    | F6ZL17 F7 | Serum amyloid A protein   |
| AOTNA     | A0A2K5F0E | A0A2K5F0E | Serum amyloid A like 1    |
| SARHA     | G3WV59    | G3WV59    | Serum amyloid A like 1    |
| PIG RABIT | F1S9B2    | F1S9B2 A0 | Serum amyloid A like 1    |
| PANTR     | A0A2I3SXC | A0A2I3SXC | Serum amyloid A like 1    |
| PAPAN M/  | A0A096MZ  | A0A096MZ  | Serum amyloid A like 1    |
| PAPAN M/  | A0A096MZ  | A0A096MZ  | Serum amyloid A like 1    |
| PAPAN M/  | A0A096MZ  | A0A096MZ  | Serum amyloid A like 1    |
| URSMA UF  | A0A452VG  | A0A452VG  | Serum amyloid A like 1    |
| MOUSE     | Q3UWC2    | Q3UWC2    | Serum amyloid A protein   |
| MONDO     | F7FFU5    | F7FFU5    | Serum amyloid A like 1    |
| MONDO     | F7FFU5    | F7FFU5    | Serum amyloid A like 1    |
| SARHA     | G3WV59    | G3WV59    | Serum amyloid A like 1    |
| BUBBU     | A0A0N6YQ  | A0A0N6YQ  | Serum amyloid A protein   |
| BUBBU     | A0A076JSH | A0A076JSH | Serum amyloid A protein   |
| BUBBU     | A0A076JSH | A0A076JSH | Serum amyloid A protein   |
| 9TELE     | A0A0S7LG  | A0A0S7LG  | Serum amyloid A protein   |
| 9TELE     | A0A0S7LG  | A0A0S7LG  | Serum amyloid A protein   |
| 9TELE     | A0A0S7LG  | A0A0S7LG  | Serum amyloid A protein   |
| DANRE     | Q642J9    | Q642J9    | Serum amyloid A protein   |
| CALJA     | F6ZH70    | F6ZH70 U  | Serum amyloid A protein   |
| NOMLE     | G1S7R2    | G1S7R2    | Serum amyloid A protein   |
| MOUSE     | P97375    | P97375 P0 | Serum amyloid A protein   |
| MACNP     | A0A515EIR | A0A515EIR | Serum amyloid A           |
| MACNP     | A0A515EIR | A0A515EIR | Serum amyloid A           |







|           |           |           |                         |
|-----------|-----------|-----------|-------------------------|
| HORSE     | F7BBH8    | F7BBH8 F6 | Serum amyloid A protein |
| HORSE     | F7BBH8    | F7BBH8 F6 | Serum amyloid A protein |
| HORSE     | F7BBH8    | F7BBH8 F6 | Serum amyloid A protein |
| HORSE     | F7BBH8    | F7BBH8 F6 | Serum amyloid A protein |
| HORSE     | F7BBH8    | F7BBH8 F6 | Serum amyloid A protein |
| HORSE     | F7BBH8    | F7BBH8 F6 | Serum amyloid A protein |
| HORSE     | F7BBH8    | F7BBH8 F6 | Serum amyloid A protein |
| HORSE     | F7BBH8    | F7BBH8 F6 | Serum amyloid A protein |
| HORSE     | F7BBH8    | F7BBH8 F6 | Serum amyloid A protein |
| HORSE     | F7BBH8    | F7BBH8 F6 | Serum amyloid A protein |
| HORSE     | F7BBH8    | F7BBH8 F6 | Serum amyloid A protein |
| HORSE     | F7BBH8    | F7BBH8 F6 | Serum amyloid A protein |
| HORSE     | F7BBH8    | F7BBH8 F6 | Serum amyloid A protein |
| HORSE     | F7BBH8    | F7BBH8 F6 | Serum amyloid A protein |
| HORSE     | F7BBH8    | F7BBH8 F6 | Serum amyloid A protein |
| HORSE     | F7BBH8    | F7BBH8 F6 | Serum amyloid A protein |
| HORSE     | F7BBH8    | F7BBH8 F6 | Serum amyloid A protein |
| HORSE     | F7BBH8    | F7BBH8 F6 | Serum amyloid A protein |
| HORSE     | F7BBH8    | F7BBH8 F6 | Serum amyloid A protein |
| RHIBE     | A0A2K6KSF | A0A2K6KSF | Serum amyloid A like 1  |
| RHIBE     | A0A2K6KSF | A0A2K6KSF | Serum amyloid A like 1  |
| URSMA UF  | A0A452VG  | A0A452VG  | Serum amyloid A like 1  |
| URSMA UF  | A0A452VG  | A0A452VG  | Serum amyloid A like 1  |
| URSMA UF  | A0A452VG  | A0A452VG  | Serum amyloid A like 1  |
| URSMA UF  | A0A452VG  | A0A452VG  | Serum amyloid A like 1  |
| MONDO     | F7FFU5    | F7FFU5    | Serum amyloid A like 1  |
| MONDO     | F7FFU5    | F7FFU5    | Serum amyloid A like 1  |
| SARHA     | G3WV59    | G3WV59    | Serum amyloid A like 1  |
| ORNAN     | F6QGS9    | F6QGS9    | Serum amyloid A like 1  |
| CAVPO     | H0V714    | H0V714    | Serum amyloid A like 1  |
| MYOLU     | G1PAL8    | G1PAL8    | Serum amyloid A like 1  |
| MACFA     | A0A2K5U4  | A0A2K5U4  | Serum amyloid A like 1  |
| MACFA     | A0A2K5U4  | A0A2K5U4  | Serum amyloid A like 1  |
| RHIRO RHI | A0A2K6Q6  | A0A2K6Q6  | Serum amyloid A like 1  |
| RHIRO RHI | A0A2K6Q6  | A0A2K6Q6  | Serum amyloid A like 1  |
| RHIRO RHI | A0A2K6Q6  | A0A2K6Q6  | Serum amyloid A like 1  |
| ICTTR     | I3M295    | I3M295    | Serum amyloid A like 1  |
| 9TELE NO1 | A0A1A8S3z | A0A1A8S3z | Serum amyloid A-like 1  |
| 9TELE     | A0A1A7WC  | A0A1A7WC  | Serum amyloid A-like 1  |
| MYOLU     | G1PAL8    | G1PAL8    | Serum amyloid A like 1  |
| MYOLU     | G1PAL8    | G1PAL8    | Serum amyloid A like 1  |
| MYOLU     | G1PAL8    | G1PAL8    | Serum amyloid A like 1  |
| MYOLU     | G1PAL8    | G1PAL8    | Serum amyloid A like 1  |
| NOMLE HC  | G1S7R2    | G1S7R2 F7 | Serum amyloid A protein |
| NOMLE HC  | G1S7R2    | G1S7R2 F7 | Serum amyloid A protein |
| NOMLE HC  | G1S7R2    | G1S7R2 F7 | Serum amyloid A protein |
| NOMLE HC  | G1S7R2    | G1S7R2 F7 | Serum amyloid A protein |

|       |     |          |          |    |                                                  |
|-------|-----|----------|----------|----|--------------------------------------------------|
| NOMLE | HC  | G1S7R2   | G1S7R2   | F7 | Serum amyloid A protein                          |
| NOMLE | HC  | G1S7R2   | G1S7R2   | F7 | Serum amyloid A protein                          |
| NOMLE | HC  | G1S7R2   | G1S7R2   | F7 | Serum amyloid A protein                          |
| NOMLE | HC  | G1S7R2   | G1S7R2   | F7 | Serum amyloid A protein                          |
| NOMLE | HC  | G1S7R2   | G1S7R2   | F7 | Serum amyloid A protein                          |
| NOMLE | HC  | G1S7R2   | G1S7R2   | F7 | Serum amyloid A protein                          |
| NOMLE | HC  | G1S7R2   | G1S7R2   | F7 | Serum amyloid A protein                          |
| NOMLE | HC  | G1S7R2   | G1S7R2   | F7 | Serum amyloid A protein                          |
| NOMLE | HC  | G1S7R2   | G1S7R2   | F7 | Serum amyloid A protein                          |
| NOMLE | FE  | G1S7R2   | G1S7R2   | Q  | Serum amyloid A protein                          |
| MESAU | HC  | P19453   | P19453   | F7 | Serum amyloid A-3 protein                        |
| MOUSE | M   | P04918   | P04918   | Q  | Serum amyloid A-3 protein                        |
| MOUSE | M   | P04918   | P04918   | Q  | Serum amyloid A-3 protein                        |
| MOUSE | M   | P04918   | P04918   | Q  | Serum amyloid A-3 protein                        |
| MOUSE | M   | P04918   | P04918   | Q  | Serum amyloid A-3 protein                        |
| MOUSE | M   | P04918   | P04918   | Q  | Serum amyloid A-3 protein                        |
| MOUSE | M   | P04918   | P04918   | Q  | Serum amyloid A-3 protein                        |
| MOUSE | M   | P04918   | P04918   | Q  | Serum amyloid A-3 protein                        |
| MOUSE | M   | P04918   | P04918   | Q  | Serum amyloid A-3 protein                        |
| MOUSE | M   | P04918   | P04918   | Q  | Serum amyloid A-3 protein                        |
| MOUSE | M   | P04918   | P04918   | Q  | Serum amyloid A-3 protein                        |
| MOUSE | M   | P04918   | P04918   | Q  | Serum amyloid A-3 protein                        |
| MOUSE | M   | P04918   | P04918   | Q  | Serum amyloid A-3 protein                        |
| MOUSE | M   | P04918   | P04918   | Q  | Serum amyloid A-3 protein                        |
| MOUSE | M   | P04918   | P04918   | Q  | Serum amyloid A-3 protein                        |
| MOUSE | M   | P04918   | P04918   | Q  | Serum amyloid A-3 protein                        |
| MOUSE | M   | P04918   | P04918   | Q  | Serum amyloid A-3 protein                        |
| MOUSE | M   | P04918   | P04918   | Q  | Serum amyloid A-3 protein                        |
| MOUSE | M   | P04918   | P04918   | Q  | Serum amyloid A-3 protein                        |
| MOUSE | M   | P04918   | P04918   | Q  | Serum amyloid A-3 protein                        |
| MOUSE | M   | P04918   | P04918   | Q  | Serum amyloid A-3 protein                        |
| MOUSE | M   | P04918   | P04918   | Q  | Serum amyloid A-3 protein                        |
| MOUSE | M   | P04918   | P04918   | Q  | Serum amyloid A-3 protein                        |
| MOUSE | M   | P04918   | P04918   | Q  | Serum amyloid A-3 protein                        |
| MOUSE | M   | P04918   | P04918   | Q  | Serum amyloid A-3 protein                        |
| MOUSE | M   | P04918   | P04918   | Q  | Serum amyloid A-3 protein                        |
| MOUSE | M   | P04918   | P04918   | Q  | Serum amyloid A-3 protein                        |
| MOUSE | M   | P04918   | P04918   | Q  | Serum amyloid A-3 protein                        |
| MOUSE | M   | P04918   | P04918   | Q  | Serum amyloid A-3 protein                        |
| MOUSE | M   | P04918   | P04918   | Q  | Serum amyloid A-3 protein                        |
| MOUSE | M   | P04918   | P04918   | Q  | Serum amyloid A-3 protein                        |
| MOUSE | M   | P04918   | P04918   | Q  | Serum amyloid A-3 protein                        |
| PIG   |     | F1S9B2   | F1S9B2   |    | Serum amyloid A like 1                           |
| MACNE |     | A0A2K6B0 | A0A2K6B0 |    | Serum amyloid A like 1                           |
| MACMU |     | F6V9Q5   | F6V9Q5   |    | Constitutively expressed serum amyloid A protein |
| MACMU |     | F6V9Q5   | F6V9Q5   |    | Constitutively expressed serum amyloid A protein |
| RABIT |     | A0A5F9DS | A0A5F9DS |    | Serum amyloid A like 1                           |
| FELCA |     | Q1T770   | Q1T770   | Q  | Serum amyloid A protein                          |
| FELCA |     | M3VUA7   | M3VUA7   |    | Serum amyloid A like 1                           |
| NOMLE | FE  | G1S7R2   | G1S7R2   | Q  | Serum amyloid A protein                          |
| 9TELE | NOT | A0A1A8CL | A0A1A8CL |    | Serum amyloid A-like 1                           |
| MYOLU |     | G1PAL8   | G1PAL8   |    | Serum amyloid A like 1                           |
| MYOLU |     | G1PAL8   | G1PAL8   |    | Serum amyloid A like 1                           |
| RHIRO |     | A0A2K6Q6 | A0A2K6Q6 |    | Serum amyloid A like 1                           |















|            |           |            |                           |
|------------|-----------|------------|---------------------------|
| HORSE      | F7BJA9    | F7BJA9     | Serum amyloid A protein   |
| HORSE      | F7BJA9    | F7BJA9     | Serum amyloid A protein   |
| HORSE      | F7BJA9    | F7BJA9     | Serum amyloid A protein   |
| ORENI      | I3JND6    | I3JND6 I3J | Serum amyloid A-like 1    |
| LATCH      | H3AUK4    | H3AUK4     | Serum amyloid A like 1    |
| MOUSE      | P31532    | P31532     | Serum amyloid A-4 protein |
| MOUSE      | P31532    | P31532     | Serum amyloid A-4 protein |
| 9TELE      | A0A1A8CLC | A0A1A8CLC  | Serum amyloid A-like 1    |
| ORNAN      | F6QGS9    | F6QGS9     | Serum amyloid A like 1    |
| ORNAN      | F6QGS9    | F6QGS9     | Serum amyloid A like 1    |
| ORNAN      | F6QGS9    | F6QGS9     | Serum amyloid A like 1    |
| CAPHI      | A0A452EM  | A0A452EM   | Serum amyloid A like 1    |
| 9TELE      | A0A1A7WC  | A0A1A7WC   | Serum amyloid A protein   |
| 9TELE      | A0A1A7WC  | A0A1A7WC   | Serum amyloid A protein   |
| MYOLU      | G1PAL8    | G1PAL8     | Serum amyloid A like 1    |
| MYOLU      | G1PAL8    | G1PAL8     | Serum amyloid A like 1    |
| MYOLU      | G1PAL8    | G1PAL8     | Serum amyloid A like 1    |
| MYOLU      | G1PAL8    | G1PAL8     | Serum amyloid A like 1    |
| MYOLU      | G1PAL8    | G1PAL8     | Serum amyloid A like 1    |
| MACNE M    | A0A2K6B0  | A0A2K6B0   | Serum amyloid A like 1    |
| ICTTR HOR  | I3M295    | I3M295 AC  | Serum amyloid A like 1    |
| MACMU      | A0A1D5QY  | A0A1D5QY   | Serum amyloid A like 1    |
| CANLF      | A0A5F4D1  | A0A5F4D1   | Serum amyloid A protein   |
| NEOVI      | P02739    | P02739     | Serum amyloid A-2 protein |
| PAPAN M    | A0A2I3MZ  | A0A2I3MZ   | Serum amyloid A like 1    |
| PAPAN M    | A0A2I3MZ  | A0A2I3MZ   | Serum amyloid A like 1    |
| PAPAN M    | A0A2I3MZ  | A0A2I3MZ   | Serum amyloid A like 1    |
| PAPAN M    | A0A2I3MZ  | A0A2I3MZ   | Serum amyloid A like 1    |
| PAPAN M    | A0A2I3MZ  | A0A2I3MZ   | Serum amyloid A like 1    |
| PAPAN M    | A0A2I3MZ  | A0A2I3MZ   | Serum amyloid A like 1    |
| HORSE      | F6PJF6    | F6PJF6     | Serum amyloid A protein   |
| HORSE      | F6PJF6    | F6PJF6     | Serum amyloid A protein   |
| ORYLA      | H2LN91    | H2LN91 AC  | Serum amyloid A-like 1    |
| COLLI      | A0A2I0MH  | A0A2I0MH   | Serum amyloid A-like 1    |
| 9TELE      | A0A1A7WC  | A0A1A7WC   | Serum amyloid A-like 1    |
| SAIBB RHIF | A0A2K6RY  | A0A2K6RY   | Serum amyloid A like 1    |
| RUPRU      | E1UYU4    | E1UYU4     | Serum amyloid A protein   |
| PIG        | F1S9B2    | F1S9B2     | Serum amyloid A like 1    |
| PIG        | F1S9B2    | F1S9B2     | Serum amyloid A like 1    |
| PIG        | F1S9B2    | F1S9B2     | Serum amyloid A like 1    |
| PIG RABIT  | F1S9B2    | F1S9B2 A0  | Serum amyloid A like 1    |
| MYOLU      | G1PAL8    | G1PAL8     | Serum amyloid A like 1    |
| MUSPF      | M3YQK5    | M3YQK5     | Serum amyloid A like 1    |
| MUSPF      | M3YQK5    | M3YQK5     | Serum amyloid A like 1    |
| PIG SHEEP  | A0A5G2QN  | A0A5G2QN   | Serum amyloid A like 1    |
| PIG        | A0A287AI4 | A0A287AI4  | Serum amyloid A like 1    |
| PIG        | A0A287AI4 | A0A287AI4  | Serum amyloid A like 1    |



VULVU|PIC A0A3Q7RF:A0A3Q7RF:Serum amyloid A protein  
MOUSE|M P04918 P04918|P1Serum amyloid A-3 protein  
MOUSE P04918 P04918 Serum amyloid A-3 protein  
RABIT P53614 P53614 Serum amyloid A-1 protein  
CANLF A0A5F4D1:A0A5F4D1:Serum amyloid A protein  
HORSE P19857 P19857 Serum amyloid A protein  
BUBBU|BO A0A076JSH A0A076JSHSerum amyloid A protein  
NEOVI P18575 P18575|P0Serum amyloid A-1 protein  
HORSE|DA F6ZPQ6 F6ZPQ6|F7Serum amyloid A protein  
CALJA F6ZH70 F6ZH70 Serum amyloid A protein  
FELCA A0A337SU:A0A337SU:Serum amyloid A protein  
FELCA A0A337SU:A0A337SU:Serum amyloid A protein  
RUPRU|CA E1UYU4 E1UYU4|B:Serum amyloid A protein  
BOVIN Q32PB7 Q32PB7 Serum amyloid A protein  
PIG F1S9B2 F1S9B2 Serum amyloid A like 1  
MACMU A0A1D5QY A0A1D5QY Serum amyloid A like 1  
MACMU A0A1D5QY A0A1D5QY Serum amyloid A like 1  
RABIT A0A5F9DS:A0A5F9DS:Serum amyloid A like 1  
RABIT G1SHI3 G1SHI3 Serum amyloid A like 1  
HUMAN P35542 P35542 Serum amyloid A-4 protein  
SARHA G3WV59 G3WV59 Serum amyloid A like 1  
CAPHI A0A452EM A0A452EM Serum amyloid A like 1  
URSMA|UF A0A452VG A0A452VG Serum amyloid A like 1

URSMA|UF A0A452VG A0A452VG Serum amyloid A like 1  
 URSMA|UF A0A452VG A0A452VG Serum amyloid A like 1  
 PANTR|PAI A0A2I3SXC A0A2I3SXC Serum amyloid A like 1  
 SAIBB A0A2K6RY\ A0A2K6RY\ Serum amyloid A like 1  
 SAIBB A0A2K6RY\ A0A2K6RY\ Serum amyloid A like 1  
 HORSE A0A5F5Q4| A0A5F5Q4| Serum amyloid A like 1  
 HORSE F6PJF6 F6PJF6 Serum amyloid A protein  
 9TELE A0A0S7LG; A0A0S7LG; Serum amyloid A protein  
 HORSE F7C0Y4 F7C0Y4 Serum amyloid A protein  
 PIG A0A480KN' A0A480KN' Serum amyloid A protein  
 PIG A0A480KN' A0A480KN' Serum amyloid A protein  
 PIG F1S9C0 F1S9C0 Serum amyloid A protein  
 TAKRU H2U9W6 H2U9W6|† Serum amyloid A-like 1  
 RABIT|HOF A0A5F9DS( A0A5F9DS( Serum amyloid A like 1  
 RABIT|HOF A0A5F9DS( A0A5F9DS( Serum amyloid A like 1  
 OTOGA|RA H0X4B8 H0X4B8|A( Serum amyloid A like 1  
 SALSA B9EPA2 B9EPA2 Serum amyloid A protein  
 9TELE A0A098GJ3 A0A098GJ3 Serum amyloid A protein  
 CANLF J9NVE9 J9NVE9 Serum amyloid A protein  
 MACFA A0A2K5U4| A0A2K5U4| Serum amyloid A like 1  
 MOUSE P04918 P04918 Serum amyloid A-3 protein  
 PIG F1S9B2 F1S9B2 Serum amyloid A like 1  
 CALJA U3FFT2 U3FFT2 Serum amyloid A protein  
 PANTA T1W3H8 T1W3H8 Serum amyloid A protein  
 HORSE F6PJF6 F6PJF6|F6z Serum amyloid A protein  
 SARHA G3WV59 G3WV59 Serum amyloid A like 1  
 RABIT A0A5F9DS( A0A5F9DS( Serum amyloid A like 1  
 VULVU|TA| A0A3Q7RF; A0A3Q7RF; Serum amyloid A protein  
 VULVU|TA| A0A3Q7RF; A0A3Q7RF; Serum amyloid A protein  
 9TELE|NO1 A0A1A8PR' A0A1A8PR' Serum amyloid A protein  
 9TELE A0A1A8FV; A0A1A8FV; Serum amyloid A protein  
 CANLF A0A5F4D1( A0A5F4D1( Serum amyloid A protein  
 SALSA|ON( B9EPA2 B9EPA2|A( Serum amyloid A protein  
 TAKRU H2V509 H2V509 Serum amyloid A protein  
 TAKRU H2V509 H2V509 Serum amyloid A protein  
 TAKRU H2V509 H2V509 Serum amyloid A protein

|       |              |           |                                    |
|-------|--------------|-----------|------------------------------------|
| TAKRU | H2V509       | H2V509    | Serum amyloid A protein            |
| TAKRU | H2V509       | H2V509    | Serum amyloid A protein            |
| TAKRU | H2V509       | H2V509    | Serum amyloid A protein            |
| TAKRU | H2V509       | H2V509    | Serum amyloid A protein            |
| TAKRU | H2V509       | H2V509    | Serum amyloid A protein            |
| TAKRU | H2V509       | H2V509    | Serum amyloid A protein            |
| TAKRU | H2V509       | H2V509    | Serum amyloid A protein            |
| TAKRU | H2V509       | H2V509    | Serum amyloid A protein            |
| TAKRU | H2V509       | H2V509    | Serum amyloid A protein            |
| TAKRU | H2V509       | H2V509    | Serum amyloid A protein            |
| TAKRU | H2V509       | H2V509    | Serum amyloid A protein            |
| TAKRU | H2V509       | H2V509    | Serum amyloid A protein            |
| TAKRU | H2V509       | H2V509    | Serum amyloid A protein            |
| TAKRU | H2V509       | H2V509    | Serum amyloid A protein            |
| BUBBU | F6K454       | F6K454    | Serum amyloid A protein (Fragment) |
| RAT   | Q5M878       | Q5M878    | Serum amyloid A protein            |
| RAT   | Q5M878       | Q5M878    | Serum amyloid A protein            |
| FELCA | M3VUA7       | M3VUA7    | Serum amyloid A like 1             |
| NOMLE | FE A0A2I3HAC | A0A2I3HAC | Serum amyloid A protein            |
| NOMLE | FE A0A2I3HAC | A0A2I3HAC | Serum amyloid A protein            |
| NOMLE | FE A0A2I3HAC | A0A2I3HAC | Serum amyloid A protein            |
| NOMLE | FE A0A2I3HAC | A0A2I3HAC | Serum amyloid A protein            |
| MACMU | F6V9P6       | F6V9P6    | Serum amyloid A protein            |
| ORYLA | H2LN91       | H2LN91 A  | Serum amyloid A-like 1             |
| ORYLA | H2LN91       | H2LN91 A  | Serum amyloid A-like 1             |
| ORYLA | H2LN91       | H2LN91 A  | Serum amyloid A-like 1             |
| HORSE | F7C0Y4       | F7C0Y4    | Serum amyloid A protein            |
| HORSE | F7C0Y4       | F7C0Y4    | Serum amyloid A protein            |
| 9TELE | A0A1A8FV!    | A0A1A8FV! | Serum amyloid A protein            |
