# Supplementary material for: Temporal kinetics of serum amyloid A (SAA) concentration and identification of SAA isoforms in blood and synovial fluid of horses with experimentally induced septic arthritis, non-septic synovitis, and systemic inflammation
Source: PubMed Central journal article supplement — J Vet Diagn Invest. 2024 Dec 17;37(1):42–54. doi: 10.1177/10406387241299873 (PMC11653388; doi:10.1177/10406387241299873), 2024-12-17
Supplement: sj-pdf-3-vdi-10.1177_10406387241299873.pdf [file sj-pdf-3-vdi-10.1177_10406387241299873.pdf]

**Supplemental Table 4. Summary of data generated by liquid chromatography-tandem mass sp**

| number | filename                | parent_cha | score | percent_sc | totalIntens | previous_a |
|--------|-------------------------|------------|-------|------------|-------------|------------|
| 755    | X2L_Roman.10910.11159.: | 2          | 10.18 | 72.3       | 1.62E+06    | (R)        |
| 782    | L5_Roman.10727.10936.2  | 2          | 10.1  | 74.2       | 9.80E+05    | (R)        |
| 9      | S1_Roman.10721.11100.2  | 2          | 20.43 | 95.1       | 1.29E+08    | (K)        |
| 15     | X4L_Roman.10686.11009.: | 2          | 20.06 | 94.2       | 3.37E+07    | (K)        |
| 17     | S3_Roman.10808.11067.2  | 2          | 19.93 | 95.2       | 6.69E+07    | (K)        |
| 19     | S2_Roman.10217.10598.2  | 2          | 19.92 | 95.3       | 6.36E+07    | (K)        |
| 24     | S4_Roman.10311.10711.2  | 2          | 19.67 | 94.6       | 9.30E+07    | (K)        |
| 31     | L3_Roman.10284.10676.2  | 2          | 19.15 | 94.8       | 1.14E+08    | (K)        |
| 33     | S5_Roman.10724.11126.2  | 2          | 18.9  | 92         | 7.14E+07    | (K)        |
| 34     | X4R_Roman.10850.11234.  | 2          | 18.71 | 95.9       | 2.26E+07    | (K)        |
| 36     | X3L_Roman.10933.11061.: | 2          | 18.4  | 91.3       | 1.58E+07    | (K)        |
| 40     | S3_Roman.10551.10679.2  | 2          | 18.31 | 87.8       | 3.65E+07    | (K)        |
| 46     | L1_Roman.10620.10620.2  | 2          | 17.73 | 88.3       | 2.90E+06    | (K)        |
| 50     | S2_Roman.10090.10090.2  | 2          | 17.48 | 79.4       | 3.03E+07    | (K)        |
| 59     | X4L_Roman.10554.10554.: | 2          | 17.05 | 83.7       | 1.59E+07    | (K)        |
| 62     | X3R_Roman.10639.10893.  | 2          | 16.92 | 92.5       | 1.10E+07    | (K)        |
| 66     | S1_Roman.10496.10496.2  | 2          | 16.82 | 96.9       | 6.25E+07    | (K)        |
| 67     | S1_Roman.10629.10629.2  | 2          | 16.62 | 81.4       | 6.25E+07    | (K)        |
| 70     | L5_Roman.10335.10335.2  | 2          | 16.45 | 78.9       | 2.24E+05    | (K)        |
| 91     | X2R_Roman.10452.10452.  | 2          | 15.95 | 92.5       | 6.68E+05    | (K)        |
| 123    | L4_Roman.10610.10755.2  | 2          | 15.11 | 82.2       | 9.25E+05    | (K)        |
| 133    | L3_Roman.10014.10155.2  | 2          | 14.83 | 84.4       | 5.81E+07    | (K)        |
| 138    | L1_Roman.10490.10490.2  | 2          | 14.73 | 81.7       | 2.90E+06    | (K)        |
| 150    | L1_Roman.10751.10751.2  | 2          | 14.46 | 81.8       | 2.90E+06    | (K)        |
| 198    | S5_Roman.10458.10597.2  | 2          | 13.63 | 73.6       | 3.70E+07    | (K)        |
| 203    | S4_Roman.10206.10206.2  | 2          | 13.56 | 72.2       | 4.81E+07    | (K)        |
| 236    | S4_Roman.10069.10069.2  | 2          | 13.26 | 74.3       | 4.81E+07    | (K)        |
| 277    | X1R_Roman.11156.11156.  | 2          | 12.79 | 73.8       | 1.99E+05    | (K)        |
| 282    | X1L_Roman.10898.10898.: | 2          | 12.7  | 87.2       | 4.35E+05    | (K)        |
| 410    | X5R_Roman.10634.10634.  | 2          | 11.73 | 70.5       | 6.07E+05    | (K)        |
| 485    | L2_Roman.11591.11591.2  | 2          | 11.3  | 70.8       | 3.88E+04    | (K)        |
| 214    | X2L_Roman.10569.10569.: | 2          | 13.46 | 73.3       | 1.15E+06    | (K)        |
| 512    | L4_Roman.30150.30150.2  | 2          | 11.21 | 78         | 1.27E+06    | (R)        |
| 694    | S5_Roman.30698.30825.2  | 2          | 10.37 | 73.3       | 2.03E+06    | (R)        |
| 748    | X2L_Roman.29747.29747.: | 2          | 10.19 | 76.5       | 1.63E+06    | (R)        |
| 525    | X3R_Roman.13191.13482.  | 2          | 11.13 | 82.4       | 3.66E+06    | (R)        |
| 653    | X4R_Roman.14197.14473.  | 2          | 10.51 | 78.8       | 9.44E+05    | (R)        |
| 753    | S5_Roman.13920.14228.2  | 2          | 10.18 | 84.5       | 1.40E+06    | (R)        |
| 289    | S3_Roman.6375.7204.2    | 2          | 12.63 | 86.8       | 2.01E+06    | (K)        |
| 555    | X1R_Roman.6421.7281.2   | 2          | 10.99 | 77.9       | 1.04E+06    | (K)        |
| 566    | S1_Roman.6289.7191.2    | 2          | 10.93 | 87.3       | 3.35E+06    | (K)        |
| 647    | X1L_Roman.5856.6612.2   | 2          | 10.56 | 80.8       | 1.69E+06    | (K)        |
| 685    | S5_Roman.6190.6936.2    | 2          | 10.39 | 80.2       | 1.04E+06    | (K)        |
| 776    | L3_Roman.5961.6426.2    | 2          | 10.12 | 84.1       | 1.13E+06    | (K)        |
| 385    | X1R_Roman.20568.21360.  | 2          | 11.9  | 78.4       | 7.89E+07    | (K)        |

|     |                         |   |       |      |              |
|-----|-------------------------|---|-------|------|--------------|
| 690 | S1_Roman.14842.14981.2  | 2 | 10.38 | 73.5 | 3.17E+06 (K) |
| 502 | X1L_Roman.7831.7981.2   | 2 | 11.27 | 75   | 3.40E+06 (R) |
| 394 | L3_Roman.14483.14483.2  | 2 | 11.84 | 80.5 | 4.02E+05 (K) |
| 523 | X1L_Roman.14730.14890.2 | 2 | 11.14 | 80.2 | 4.99E+05 (K) |
| 612 | X5R_Roman.14778.14917.2 | 2 | 10.73 | 87.1 | 6.65E+05 (K) |
| 706 | X1R_Roman.15287.15442.2 | 2 | 10.3  | 82.6 | 7.83E+05 (K) |
| 703 | S4_Roman.18604.18843.2  | 2 | 10.31 | 77.1 | 4.33E+07 (K) |
| 741 | L3_Roman.18133.18509.2  | 2 | 10.2  | 76.2 | 3.86E+07 (K) |
| 489 | X5R_Roman.17017.17017.2 | 2 | 11.3  | 76.4 | 1.56E+05 (R) |
| 519 | X2L_Roman.16543.16543.2 | 2 | 11.16 | 86.3 | 2.26E+05 (R) |
| 800 | X1L_Roman.17063.17063.2 | 2 | 10.03 | 78.7 | 1.39E+05 (R) |
| 595 | S5_Roman.20618.21812.2  | 2 | 10.79 | 88.2 | 9.86E+07 (K) |
| 775 | X3R_Roman.19350.20683.2 | 2 | 10.13 | 84.4 | 2.93E+07 (K) |
| 661 | S4_Roman.4595.4724.2    | 2 | 10.48 | 73.7 | 6.61E+07 (R) |
| 427 | S3_Roman.6990.6990.2    | 2 | 11.59 | 82   | 2.25E+07 (R) |
| 643 | S1_Roman.6980.6980.2    | 2 | 10.59 | 89.8 | 1.03E+07 (R) |
| 659 | S5_Roman.6872.7966.2    | 2 | 10.49 | 86.6 | 7.73E+06 (R) |
| 747 | S3_Roman.7906.7906.2    | 2 | 10.19 | 81.7 | 1.15E+06 (R) |
| 89  | L3_Roman.4070.4929.2    | 2 | 15.97 | 89.1 | 3.22E+07 (R) |
| 126 | S4_Roman.4083.4212.2    | 2 | 15.04 | 81.5 | 8.44E+06 (R) |
| 140 | S1_Roman.4333.4449.3    | 3 | 14.67 | 85.6 | 4.38E+07 (R) |
| 145 | X4L_Roman.4045.4045.2   | 2 | 14.6  | 82.4 | 3.14E+06 (R) |
| 151 | S1_Roman.4460.4460.2    | 2 | 14.46 | 81   | 2.05E+07 (R) |
| 154 | S5_Roman.4380.4511.2    | 2 | 14.36 | 85.2 | 3.65E+06 (R) |
| 156 | S3_Roman.4389.4518.3    | 3 | 14.35 | 85.3 | 2.40E+07 (R) |
| 163 | S3_Roman.4519.4519.2    | 2 | 14.19 | 84.5 | 1.16E+07 (R) |
| 168 | X4L_Roman.4035.4035.3   | 3 | 14.15 | 82.7 | 5.70E+06 (R) |
| 171 | S2_Roman.4198.4198.3    | 3 | 14.12 | 83   | 2.44E+07 (R) |
| 192 | X2L_Roman.4244.4244.3   | 3 | 13.74 | 77.3 | 1.77E+05 (R) |
| 199 | S2_Roman.4200.4200.2    | 2 | 13.62 | 82.2 | 1.59E+07 (R) |
| 200 | X5R_Roman.4052.4052.3   | 3 | 13.62 | 90.4 | 9.28E+04 (R) |
| 206 | X2L_Roman.4253.4253.2   | 2 | 13.54 | 84.4 | 1.17E+05 (R) |
| 212 | S5_Roman.4372.4372.3    | 3 | 13.48 | 89.7 | 7.40E+06 (R) |
| 218 | S5_Roman.4513.4513.3    | 3 | 13.42 | 74   | 7.40E+06 (R) |
| 237 | X3R_Roman.4310.4310.2   | 2 | 13.25 | 100  | 7.74E+05 (R) |
| 264 | X4R_Roman.4538.4654.3   | 3 | 12.87 | 75.8 | 9.27E+06 (R) |
| 292 | X2R_Roman.4065.4065.3   | 3 | 12.57 | 77.1 | 8.72E+04 (R) |
| 306 | L1_Roman.4172.4172.3    | 3 | 12.45 | 75.8 | 9.51E+05 (R) |
| 323 | S1_Roman.4340.4340.2    | 2 | 12.32 | 75.5 | 2.05E+07 (R) |
| 351 | L5_Roman.4076.4076.3    | 3 | 12.16 | 72.2 | 6.54E+04 (R) |
| 354 | X3R_Roman.4293.4293.3   | 3 | 12.15 | 76.4 | 1.66E+06 (R) |
| 422 | X3L_Roman.4463.4463.2   | 2 | 11.66 | 75.8 | 4.63E+05 (R) |
| 432 | X1L_Roman.4302.4302.2   | 2 | 11.57 | 79.2 | 4.34E+04 (R) |
| 436 | X2R_Roman.4074.4074.2   | 2 | 11.54 | 75.1 | 6.06E+04 (R) |
| 453 | X3L_Roman.4560.4560.3   | 3 | 11.45 | 92.2 | 9.31E+05 (R) |
| 455 | L5_Roman.4087.4087.2    | 2 | 11.44 | 87.7 | 3.95E+04 (R) |
| 534 | X4R_Roman.4556.4678.2   | 2 | 11.1  | 74.2 | 3.62E+06 (R) |

|     |                        |   |       |      |              |
|-----|------------------------|---|-------|------|--------------|
| 692 | X1R_Roman.4618.4618.3  | 3 | 10.38 | 70.4 | 1.74E+05 (R) |
| 738 | X1L_Roman.4277.4277.3  | 3 | 10.21 | 76.9 | 9.56E+04 (R) |
| 225 | S2_Roman.6168.6288.2   | 2 | 13.36 | 88.3 | 1.38E+07 (R) |
| 228 | X4L_Roman.6522.6638.2  | 2 | 13.34 | 87.3 | 9.16E+06 (R) |
| 254 | S4_Roman.6187.6330.2   | 2 | 12.99 | 87.4 | 1.29E+07 (R) |
| 268 | S3_Roman.6614.6734.2   | 2 | 12.83 | 89.3 | 4.65E+07 (R) |
| 269 | L3_Roman.6163.6297.2   | 2 | 12.82 | 88   | 8.97E+06 (R) |
| 357 | S5_Roman.6549.6683.2   | 2 | 12.13 | 88.6 | 2.03E+07 (R) |
| 358 | X4R_Roman.6775.6775.2  | 2 | 12.13 | 87.1 | 5.25E+06 (R) |
| 430 | X3R_Roman.6402.6521.2  | 2 | 11.58 | 89.1 | 7.30E+06 (R) |
| 440 | S1_Roman.6638.6761.2   | 2 | 11.5  | 86.8 | 2.12E+07 (R) |
| 581 | S1_Roman.6515.6515.2   | 2 | 10.84 | 83.4 | 2.12E+07 (R) |
| 652 | X3L_Roman.6579.6697.2  | 2 | 10.52 | 73   | 6.40E+06 (R) |
| 321 | L3_Roman.5309.5454.2   | 2 | 12.34 | 75   | 8.09E+06 (R) |
| 688 | X4R_Roman.5888.6152.2  | 2 | 10.39 | 74.6 | 1.99E+07 (R) |
| 726 | S5_Roman.5651.5798.2   | 2 | 10.23 | 73.8 | 9.96E+06 (R) |
| 790 | X4L_Roman.5448.5571.2  | 2 | 10.07 | 72.6 | 1.94E+07 (R) |
| 474 | X2R_Roman.45363.45569. | 3 | 11.34 | 82.1 | 1.51E+07 (R) |
| 514 | L1_Roman.45627.45879.3 | 3 | 11.19 | 78.1 | 3.15E+07 (R) |
| 586 | X5R_Roman.46221.46472. | 3 | 10.84 | 75.1 | 1.42E+07 (R) |
| 620 | S1_Roman.44668.44872.3 | 3 | 10.7  | 78   | 4.33E+07 (R) |
| 626 | X4R_Roman.45176.45280. | 3 | 10.67 | 76.4 | 3.72E+07 (R) |
| 729 | S5_Roman.45638.45746.3 | 3 | 10.22 | 78.8 | 2.40E+07 (R) |
| 759 | X1R_Roman.45854.46068. | 3 | 10.16 | 78.9 | 2.90E+07 (R) |
| 773 | S2_Roman.44503.44702.3 | 3 | 10.13 | 77.4 | 4.70E+07 (R) |
| 452 | X2R_Roman.12798.13362. | 2 | 11.45 | 84   | 8.05E+06 (K) |
| 616 | S1_Roman.13371.13878.2 | 2 | 10.71 | 83.6 | 4.65E+07 (K) |
| 720 | X4R_Roman.13577.13980. | 2 | 10.26 | 85.7 | 1.20E+07 (K) |
| 754 | X1L_Roman.13167.13492. | 2 | 10.18 | 85   | 5.86E+06 (K) |
| 607 | S5_Roman.12742.12880.2 | 2 | 10.75 | 85.1 | 3.49E+05 (K) |
| 654 | L3_Roman.12122.12431.2 | 2 | 10.5  | 84.6 | 6.93E+05 (K) |
| 801 | L3_Roman.16734.16734.3 | 3 | 10.02 | 84.3 | 1.28E+07 (K) |
| 61  | L3_Roman.4588.4718.2   | 2 | 16.98 | 88.1 | 8.27E+06 (K) |
| 153 | S3_Roman.5073.5073.2   | 2 | 14.39 | 86.9 | 3.91E+06 (K) |
| 162 | S5_Roman.5059.5059.2   | 2 | 14.22 | 90.6 | 3.26E+06 (K) |
| 424 | S2_Roman.4634.4775.2   | 2 | 11.63 | 79.3 | 3.87E+06 (K) |
| 610 | S5_Roman.4933.4933.2   | 2 | 10.73 | 72.2 | 3.20E+06 (K) |
| 166 | X4R_Roman.20894.20894. | 3 | 14.17 | 84.1 | 2.19E+06 (K) |
| 213 | S2_Roman.20108.20108.3 | 3 | 13.46 | 72.6 | 6.42E+06 (K) |
| 556 | X4L_Roman.20875.20875. | 3 | 10.99 | 72.3 | 3.58E+06 (K) |
| 247 | L3_Roman.20301.20301.3 | 3 | 13.03 | 79   | 1.86E+07 (K) |
| 350 | S3_Roman.20978.20978.3 | 3 | 12.17 | 70.8 | 1.13E+07 (K) |
| 359 | L3_Roman.20116.20381.4 | 4 | 12.12 | 75   | 5.34E+06 (K) |
| 378 | X4R_Roman.20810.20936. | 4 | 11.96 | 81.2 | 9.92E+05 (K) |
| 411 | S1_Roman.20761.20761.3 | 3 | 11.72 | 81.3 | 8.14E+06 (K) |
| 493 | S4_Roman.20505.20648.4 | 4 | 11.29 | 72.6 | 1.07E+06 (K) |
| 494 | S4_Roman.20645.20645.3 | 3 | 11.29 | 79.1 | 7.81E+06 (K) |

|     |                         |   |       |      |              |
|-----|-------------------------|---|-------|------|--------------|
| 571 | S3_Roman.20805.21066.4  | 4 | 10.88 | 78.2 | 1.54E+05 (K) |
| 617 | S3_Roman.20854.20854.3  | 3 | 10.71 | 70.5 | 1.13E+07 (K) |
| 680 | X4R_Roman.20685.20685.  | 4 | 10.41 | 72.8 | 9.92E+05 (K) |
| 691 | S2_Roman.20245.20245.3  | 3 | 10.38 | 71.8 | 6.42E+06 (K) |
| 699 | S1_Roman.20792.20792.4  | 4 | 10.34 | 72.6 | 5.06E+06 (K) |
| 781 | L3_Roman.21423.21423.2  | 2 | 10.1  | 80.2 | 3.25E+04 (K) |
| 65  | S2_Roman.5366.5366.2    | 2 | 16.83 | 86.6 | 1.88E+06 (K) |
| 110 | S5_Roman.5592.5592.2    | 2 | 15.42 | 85.4 | 3.15E+06 (K) |
| 128 | S1_Roman.5677.5677.3    | 3 | 14.98 | 79.4 | 2.71E+07 (K) |
| 137 | S3_Roman.5709.5709.2    | 2 | 14.76 | 77.4 | 2.92E+06 (K) |
| 202 | S1_Roman.5727.5727.2    | 2 | 13.59 | 77.3 | 2.86E+06 (K) |
| 232 | L3_Roman.5158.5158.2    | 2 | 13.3  | 74.7 | 1.14E+06 (K) |
| 314 | L3_Roman.5289.5289.2    | 2 | 12.39 | 76.1 | 1.14E+06 (K) |
| 319 | S4_Roman.5269.5269.3    | 3 | 12.35 | 71.2 | 5.84E+06 (K) |
| 339 | S3_Roman.5667.5667.3    | 3 | 12.24 | 76.4 | 2.45E+07 (K) |
| 529 | S5_Roman.5468.5468.2    | 2 | 11.12 | 87.3 | 3.15E+06 (K) |
| 667 | S1_Roman.5604.5604.2    | 2 | 10.45 | 80.4 | 2.86E+06 (K) |
| 75  | S5_Roman.11830.11830.4  | 4 | 16.27 | 75.6 | 2.85E+06 (K) |
| 193 | L3_Roman.11311.11311.4  | 4 | 13.72 | 72.9 | 2.09E+06 (K) |
| 258 | S5_Roman.11854.11854.3  | 3 | 12.94 | 73.8 | 8.69E+05 (K) |
| 462 | S5_Roman.11716.11716.3  | 3 | 11.39 | 86.9 | 8.69E+05 (K) |
| 541 | S2_Roman.11466.11466.3  | 3 | 11.06 | 71.1 | 1.34E+06 (K) |
| 60  | L3_Roman.17387.17669.3  | 3 | 17.04 | 81.2 | 1.70E+06 (K) |
| 81  | S4_Roman.16210.16865.4  | 4 | 16.17 | 85.7 | 4.71E+07 (K) |
| 90  | S4_Roman.17871.18021.3  | 3 | 15.95 | 84.9 | 1.46E+06 (K) |
| 106 | S5_Roman.17047.17179.4  | 4 | 15.52 | 80.4 | 4.94E+07 (K) |
| 116 | S2_Roman.16303.16303.3  | 3 | 15.24 | 80.7 | 2.40E+07 (K) |
| 129 | S1_Roman.16969.17329.4  | 4 | 14.94 | 86.1 | 1.31E+08 (K) |
| 152 | S2_Roman.16548.16548.3  | 3 | 14.41 | 77.9 | 2.40E+07 (K) |
| 157 | S5_Roman.18262.18393.4  | 4 | 14.34 | 74.4 | 4.72E+06 (K) |
| 169 | S1_Roman.18237.18361.3  | 3 | 14.14 | 81.4 | 3.35E+06 (K) |
| 179 | S1_Roman.17105.17105.3  | 3 | 13.96 | 81.2 | 3.54E+07 (K) |
| 183 | L3_Roman.16381.16648.4  | 4 | 13.84 | 83   | 3.48E+07 (K) |
| 188 | S3_Roman.16732.17378.4  | 4 | 13.8  | 80.8 | 7.38E+07 (K) |
| 222 | S2_Roman.16346.16703.4  | 4 | 13.4  | 84.9 | 6.45E+07 (K) |
| 227 | S4_Roman.16454.16581.3  | 3 | 13.34 | 90.9 | 1.75E+07 (K) |
| 239 | S3_Roman.18282.18282.3  | 3 | 13.21 | 80.3 | 2.34E+06 (K) |
| 245 | S3_Roman.17080.17080.3  | 3 | 13.07 | 80.2 | 2.09E+07 (K) |
| 256 | S5_Roman.17049.17460.3  | 3 | 12.96 | 86.7 | 1.53E+07 (K) |
| 257 | S3_Roman.17120.17120.4  | 4 | 12.95 | 86.5 | 7.38E+07 (K) |
| 265 | S3_Roman.16962.16962.3  | 3 | 12.86 | 70.4 | 2.09E+07 (K) |
| 272 | X3R_Roman.15491.15491.  | 4 | 12.8  | 82.5 | 4.27E+06 (K) |
| 322 | X3R_Roman.15469.15469.  | 3 | 12.34 | 70.7 | 1.44E+06 (K) |
| 340 | S3_Roman.18417.18417.3  | 3 | 12.22 | 78.7 | 2.34E+06 (K) |
| 346 | S1_Roman.16867.17349.3  | 3 | 12.2  | 74.1 | 3.54E+07 (K) |
| 352 | S1_Roman.17236.17236.2  | 2 | 12.15 | 71.7 | 4.67E+06 (K) |
| 362 | X3L_Roman.17075.17191.4 | 4 | 12.11 | 80.1 | 1.26E+07 (K) |

|     |                         |   |       |      |              |
|-----|-------------------------|---|-------|------|--------------|
| 363 | L3_Roman.17529.17529.3  | 3 | 12.09 | 79.7 | 1.70E+06 (K) |
| 376 | S4_Roman.16926.16926.2  | 2 | 11.97 | 74   | 2.95E+06 (K) |
| 387 | X3L_Roman.17228.17228.3 | 3 | 11.9  | 82   | 3.96E+06 (K) |
| 397 | S2_Roman.16497.16497.2  | 2 | 11.83 | 70.3 | 3.30E+06 (K) |
| 398 | L3_Roman.16252.16252.4  | 4 | 11.82 | 70.7 | 3.48E+07 (K) |
| 416 | L3_Roman.16340.16340.3  | 3 | 11.7  | 78   | 1.28E+07 (K) |
| 442 | X4R_Roman.17096.17096.2 | 2 | 11.5  | 77.8 | 3.07E+05 (K) |
| 478 | S1_Roman.16842.16842.4  | 4 | 11.33 | 79.3 | 1.31E+08 (K) |
| 504 | S5_Roman.17112.17112.2  | 2 | 11.25 | 74.5 | 2.49E+06 (K) |
| 507 | S1_Roman.17222.17222.3  | 3 | 11.24 | 73.2 | 3.54E+07 (K) |
| 526 | X4R_Roman.17255.17255.4 | 4 | 11.13 | 76.8 | 7.34E+06 (K) |
| 545 | S4_Roman.16330.16330.3  | 3 | 11.04 | 80   | 1.75E+07 (K) |
| 548 | S3_Roman.17322.17322.3  | 3 | 11.02 | 72.1 | 2.09E+07 (K) |
| 567 | S3_Roman.16841.16841.3  | 3 | 10.93 | 70.4 | 2.09E+07 (K) |
| 569 | S2_Roman.16615.16615.2  | 2 | 10.91 | 72.7 | 3.30E+06 (K) |
| 589 | L3_Roman.16468.16468.3  | 3 | 10.81 | 88.3 | 1.28E+07 (K) |
| 592 | S2_Roman.16422.16672.3  | 3 | 10.8  | 73.6 | 2.40E+07 (K) |
| 642 | L3_Roman.17651.17651.4  | 4 | 10.59 | 73.1 | 3.96E+06 (K) |
| 649 | X4R_Roman.17298.17298.3 | 3 | 10.56 | 76.3 | 2.27E+06 (K) |
| 657 | S3_Roman.18351.18351.4  | 4 | 10.49 | 80.5 | 5.99E+06 (K) |
| 702 | X4R_Roman.17152.17152.3 | 3 | 10.33 | 70.7 | 2.27E+06 (K) |
| 750 | X4L_Roman.16741.16741.4 | 4 | 10.19 | 73.3 | 7.82E+06 (K) |
| 784 | S5_Roman.17241.17241.2  | 2 | 10.1  | 74.7 | 2.49E+06 (K) |
| 802 | S1_Roman.16988.16988.3  | 3 | 10.02 | 71.9 | 3.54E+07 (R) |
| 250 | S4_Roman.20504.20504.3  | 3 | 13.01 | 74   | 7.81E+06 (K) |
| 513 | L3_Roman.14596.14596.3  | 3 | 11.2  | 75.2 | 4.19E+05 (K) |
| 273 | L3_Roman.20436.20436.3  | 3 | 12.79 | 80.4 | 1.86E+07 (K) |
| 375 | X4L_Roman.20812.21085.4 | 4 | 11.98 | 77.7 | 5.40E+05 (K) |
| 211 | L5_Roman.11737.12020.2  | 2 | 13.48 | 76.8 | 5.22E+06 (K) |
| 807 | X5R_Roman.26060.26205.3 | 3 | 10.02 | 80.5 | 4.64E+05 (K) |
| 68  | S3_Roman.10016.10016.2  | 2 | 16.57 | 81   | 6.08E+07 (R) |
| 74  | L3_Roman.9668.10390.2   | 2 | 16.34 | 78.7 | 6.68E+07 (R) |
| 135 | S5_Roman.10088.10808.2  | 2 | 14.8  | 75   | 5.58E+07 (R) |
| 178 | S1_Roman.9917.10785.2   | 2 | 13.98 | 78   | 6.57E+07 (R) |
| 309 | X1R_Roman.8834.9652.2   | 2 | 12.41 | 80.1 | 9.58E+06 (K) |
| 799 | S1_Roman.8990.9117.2    | 2 | 10.03 | 75.5 | 6.54E+06 (K) |
| 809 | L3_Roman.8380.8662.2    | 2 | 10.01 | 79   | 3.16E+07 (K) |
| 577 | X4R_Roman.18192.18487.4 | 4 | 10.86 | 78.8 | 1.77E+06 (R) |
| 669 | S5_Roman.18370.18370.3  | 3 | 10.45 | 78.5 | 3.86E+06 (R) |
| 77  | X4R_Roman.9696.10095.2  | 2 | 16.24 | 82.7 | 5.72E+07 (R) |
| 88  | X4L_Roman.9535.9799.2   | 2 | 15.99 | 85.1 | 3.76E+07 (R) |
| 92  | X3R_Roman.9538.9796.2   | 2 | 15.92 | 80   | 2.30E+07 (R) |
| 101 | S2_Roman.9173.9429.2    | 2 | 15.64 | 85.4 | 8.17E+07 (R) |
| 113 | S4_Roman.9062.9471.2    | 2 | 15.34 | 82.5 | 8.89E+07 (R) |
| 125 | S5_Roman.9472.9858.2    | 2 | 15.06 | 81.4 | 1.15E+08 (R) |
| 148 | S1_Roman.9465.9858.2    | 2 | 14.49 | 80   | 1.44E+08 (R) |
| 204 | L3_Roman.9027.9423.2    | 2 | 13.55 | 80.9 | 1.39E+08 (R) |

|     |                         |   |       |      |              |
|-----|-------------------------|---|-------|------|--------------|
| 276 | S3_Roman.8635.9970.2    | 2 | 12.79 | 81.7 | 1.38E+08 (R) |
| 475 | X3L_Roman.9652.9917.2   | 2 | 11.34 | 77.8 | 2.37E+07 (R) |
| 234 | S4_Roman.20328.20605.4  | 4 | 13.28 | 70.2 | 1.38E+06 (R) |
| 384 | S4_Roman.20393.20393.3  | 3 | 11.92 | 70.2 | 4.91E+04 (R) |
| 497 | S1_Roman.20784.20784.4  | 4 | 11.28 | 76.5 | 7.90E+05 (R) |
| 120 | X4L_Roman.20778.20910.4 | 4 | 15.14 | 74.3 | 2.45E+06 (R) |
| 287 | S4_Roman.20269.20526.4  | 4 | 12.64 | 71.8 | 6.35E+06 (R) |
| 425 | S2_Roman.5743.5743.2    | 2 | 11.63 | 74.3 | 4.13E+07 (R) |
| 447 | X3L_Roman.18440.18581.4 | 4 | 11.46 | 75.4 | 1.27E+06 (R) |
| 538 | X4L_Roman.18714.18852.4 | 4 | 11.08 | 71.5 | 1.23E+06 (R) |
| 716 | X4R_Roman.18564.18702.4 | 4 | 10.27 | 75.9 | 1.04E+06 (R) |
| 724 | L2_Roman.18984.19125.4  | 4 | 10.23 | 77   | 7.80E+05 (R) |
| 547 | X3L_Roman.12639.12786.2 | 2 | 11.03 | 76.1 | 1.24E+07 (K) |
| 562 | S5_Roman.12456.12752.2  | 2 | 10.95 | 74.3 | 2.20E+07 (K) |
| 635 | X4L_Roman.12379.12526.2 | 2 | 10.64 | 78.4 | 1.46E+07 (K) |
| 742 | X2L_Roman.12170.12318.2 | 2 | 10.2  | 76.9 | 1.05E+07 (K) |
| 763 | X3L_Roman.12148.12294.3 | 3 | 10.15 | 75.2 | 1.65E+05 (R) |
| 320 | L3_Roman.20055.20435.2  | 2 | 12.34 | 85   | 2.22E+07 (R) |
| 542 | S4_Roman.20366.20773.2  | 2 | 11.06 | 82.3 | 1.63E+07 (R) |
| 677 | L1_Roman.20212.20502.2  | 2 | 10.41 | 81.1 | 1.02E+07 (R) |
| 683 | X5R_Roman.20339.20921.2 | 2 | 10.4  | 80.3 | 1.47E+07 (R) |
| 732 | X1R_Roman.20547.21208.2 | 2 | 10.22 | 82.9 | 1.84E+07 (R) |
| 787 | X2L_Roman.20281.20543.2 | 2 | 10.08 | 85   | 9.54E+06 (R) |
| 666 | L3_Roman.5069.5069.2    | 2 | 10.45 | 74.3 | 1.21E+08 (R) |
| 761 | S2_Roman.5106.5234.2    | 2 | 10.15 | 72.2 | 1.07E+08 (R) |
| 54  | S4_Roman.4801.4801.2    | 2 | 17.25 | 80.7 | 1.91E+05 (K) |
| 73  | X3R_Roman.4896.4896.2   | 2 | 16.38 | 80.3 | 1.27E+05 (K) |
| 114 | X3R_Roman.4894.4894.3   | 3 | 15.28 | 80.5 | 3.59E+05 (K) |
| 146 | S3_Roman.5246.5246.2    | 2 | 14.55 | 85.7 | 6.93E+04 (K) |
| 160 | X1L_Roman.4967.4967.3   | 3 | 14.3  | 72.8 | 6.01E+04 (K) |
| 164 | X2L_Roman.4926.4926.3   | 3 | 14.19 | 83.1 | 1.05E+05 (K) |
| 170 | X4R_Roman.5382.5382.2   | 2 | 14.14 | 73.6 | 2.60E+05 (K) |
| 181 | S1_Roman.5184.5184.2    | 2 | 13.9  | 75.7 | 1.31E+05 (K) |
| 210 | X4L_Roman.4893.4893.3   | 3 | 13.49 | 78.2 | 8.96E+05 (K) |
| 220 | S5_Roman.5136.5136.3    | 3 | 13.41 | 77.3 | 5.20E+05 (K) |
| 266 | X4R_Roman.5449.5449.3   | 3 | 12.85 | 73.5 | 1.34E+06 (K) |
| 501 | S5_Roman.5122.5122.2    | 2 | 11.27 | 74.4 | 1.56E+05 (K) |
| 596 | X2R_Roman.4785.4785.2   | 2 | 10.79 | 73.6 | 4.54E+04 (K) |
| 1   | S4_Roman.4985.5123.2    | 2 | 24.48 | 92.2 | 6.53E+06 (K) |
| 2   | S2_Roman.5117.5117.2    | 2 | 23    | 91   | 5.81E+06 (K) |
| 3   | S1_Roman.5443.5574.2    | 2 | 22.33 | 94.8 | 9.78E+06 (K) |
| 7   | L3_Roman.5128.5128.2    | 2 | 20.84 | 93.3 | 8.48E+06 (K) |
| 23  | X4L_Roman.5199.5327.2   | 2 | 19.81 | 86.6 | 1.06E+07 (K) |
| 28  | X4R_Roman.5629.5629.2   | 2 | 19.24 | 86.2 | 3.05E+06 (K) |
| 41  | S5_Roman.5416.5416.2    | 2 | 18.27 | 84.6 | 1.85E+06 (K) |
| 45  | S3_Roman.5327.5464.3    | 3 | 17.83 | 88.2 | 1.84E+07 (K) |
| 51  | X4L_Roman.5073.5073.2   | 2 | 17.45 | 78.7 | 1.06E+07 (K) |

|     |                         |   |       |      |              |
|-----|-------------------------|---|-------|------|--------------|
| 72  | S2_Roman.4996.4996.2    | 2 | 16.43 | 88.6 | 5.81E+06 (K) |
| 80  | X3R_Roman.5047.5047.2   | 2 | 16.21 | 79.3 | 2.13E+06 (K) |
| 82  | X3R_Roman.5169.5169.2   | 2 | 16.17 | 76.8 | 2.13E+06 (K) |
| 83  | S4_Roman.4786.5100.3    | 3 | 16.15 | 89.9 | 1.33E+07 (K) |
| 85  | X2L_Roman.5114.5114.2   | 2 | 16.12 | 79.4 | 1.32E+05 (K) |
| 93  | L3_Roman.4798.5109.3    | 3 | 15.82 | 85.8 | 1.70E+07 (K) |
| 95  | S5_Roman.5283.5283.2    | 2 | 15.77 | 79   | 1.85E+06 (K) |
| 100 | X3L_Roman.5583.5583.2   | 2 | 15.7  | 92.5 | 9.23E+05 (K) |
| 136 | X4R_Roman.5505.5505.2   | 2 | 14.8  | 84.1 | 3.05E+06 (K) |
| 141 | S1_Roman.5319.5319.2    | 2 | 14.66 | 75.8 | 9.78E+06 (K) |
| 191 | X3L_Roman.5451.5451.2   | 2 | 13.78 | 79.9 | 9.23E+05 (K) |
| 248 | S3_Roman.5466.5466.2    | 2 | 13.02 | 79.7 | 6.72E+06 (K) |
| 338 | L1_Roman.5016.5016.2    | 2 | 12.25 | 75.7 | 7.26E+05 (K) |
| 521 | L3_Roman.4988.4988.2    | 2 | 11.14 | 82.3 | 8.48E+06 (K) |
| 38  | S5_Roman.5267.5433.3    | 3 | 18.38 | 87.8 | 4.37E+06 (K) |
| 52  | S3_Roman.5344.5344.2    | 2 | 17.44 | 71.9 | 6.72E+06 (K) |
| 71  | X4R_Roman.5475.5725.3   | 3 | 16.45 | 83   | 1.21E+07 (K) |
| 78  | X3L_Roman.5425.5549.3   | 3 | 16.23 | 84.4 | 3.19E+06 (K) |
| 104 | X4L_Roman.5014.5316.3   | 3 | 15.56 | 86.3 | 2.39E+07 (K) |
| 112 | S2_Roman.4972.5221.3    | 3 | 15.35 | 81.5 | 1.44E+07 (K) |
| 121 | S1_Roman.5297.5500.3    | 3 | 15.12 | 88.3 | 3.09E+07 (K) |
| 298 | X3R_Roman.5060.5225.3   | 3 | 12.51 | 74.4 | 4.36E+06 (K) |
| 662 | S3_Roman.14987.15261.2  | 2 | 10.47 | 84.6 | 1.01E+07 (R) |
| 344 | L5_Roman.15422.15695.2  | 2 | 12.21 | 82.8 | 3.11E+05 (R) |
| 467 | X4R_Roman.16184.16448.  | 2 | 11.37 | 78.1 | 6.85E+05 (R) |
| 96  | S5_Roman.15527.16057.2  | 2 | 15.76 | 89.1 | 1.30E+08 (R) |
| 117 | X4R_Roman.15364.15751.  | 2 | 15.23 | 88.9 | 8.31E+07 (R) |
| 187 | S3_Roman.15603.15960.2  | 2 | 13.82 | 87.2 | 1.22E+08 (R) |
| 197 | S1_Roman.15480.15853.2  | 2 | 13.65 | 87.3 | 2.88E+08 (R) |
| 208 | X4L_Roman.15000.15524.: | 2 | 13.51 | 90.7 | 6.28E+07 (R) |
| 224 | X3L_Roman.15725.15725.: | 2 | 13.37 | 81.7 | 3.26E+07 (R) |
| 305 | L1_Roman.14742.14874.2  | 2 | 12.46 | 83.5 | 4.14E+06 (R) |
| 409 | S5_Roman.11855.11855.2  | 2 | 11.73 | 74.6 | 4.65E+05 (R) |
| 459 | X3R_Roman.14084.14327.  | 2 | 11.41 | 75.8 | 6.56E+07 (R) |
| 572 | X4R_Roman.15235.15235.  | 2 | 10.88 | 72.1 | 8.31E+07 (R) |
| 709 | L3_Roman.11314.11314.2  | 2 | 10.29 | 85   | 4.39E+05 (R) |
| 756 | X3L_Roman.12109.12109.: | 2 | 10.18 | 72.2 | 2.32E+04 (R) |
| 760 | X4L_Roman.11893.11893.: | 2 | 10.16 | 71.5 | 1.34E+05 (R) |
| 602 | X5R_Roman.29943.30276.  | 3 | 10.77 | 80.2 | 9.63E+06 (R) |
| 476 | X4R_Roman.16555.16690.  | 2 | 11.34 | 75   | 4.05E+06 (R) |
| 550 | X5R_Roman.16402.16541.  | 2 | 11.02 | 72.4 | 7.11E+06 (R) |
| 582 | S3_Roman.14745.15136.2  | 2 | 10.84 | 79.3 | 4.35E+06 (R) |
| 725 | S4_Roman.35229.35229.3  | 3 | 10.23 | 73.9 | 2.57E+04 (R) |
| 806 | X1R_Roman.5731.6134.2   | 2 | 10.02 | 79.5 | 7.43E+06 (K) |
| 53  | S3_Roman.6893.7029.2    | 2 | 17.25 | 77.8 | 3.89E+06 (R) |
| 142 | S4_Roman.38855.39199.3  | 3 | 14.64 | 72.8 | 2.30E+06 (R) |
| 144 | X2L_Roman.37650.38087.: | 3 | 14.6  | 72.9 | 7.50E+06 (R) |

|     |                        |   |       |      |              |
|-----|------------------------|---|-------|------|--------------|
| 155 | X2R_Roman.38257.38801. | 3 | 14.36 | 73.6 | 7.17E+06 (R) |
| 167 | X4R_Roman.38675.39022. | 3 | 14.16 | 70.2 | 6.19E+06 (R) |
| 174 | X5R_Roman.39144.39243. | 3 | 14.08 | 73.3 | 3.28E+06 (R) |
| 295 | X3L_Roman.38376.38714. | 3 | 12.56 | 76.4 | 6.73E+06 (R) |
| 483 | L4_Roman.38253.38676.3 | 3 | 11.31 | 70.2 | 4.19E+06 (R) |
| 389 | X4L_Roman.12571.12716. | 2 | 11.88 | 91.6 | 2.51E+06 (R) |
| 471 | S1_Roman.12707.12968.2 | 2 | 11.34 | 89.4 | 1.09E+07 (R) |
| 481 | X3L_Roman.12725.12870. | 2 | 11.32 | 88.6 | 1.06E+06 (R) |
| 486 | S2_Roman.12179.12325.2 | 2 | 11.3  | 87.9 | 9.43E+06 (R) |
| 487 | S4_Roman.12086.12378.2 | 2 | 11.3  | 89   | 9.76E+06 (R) |
| 488 | S5_Roman.12624.12919.2 | 2 | 11.3  | 88.3 | 1.55E+07 (R) |
| 496 | L3_Roman.11887.12324.2 | 2 | 11.28 | 86.8 | 1.12E+07 (R) |
| 532 | X3R_Roman.12127.12273. | 2 | 11.11 | 83.5 | 1.65E+06 (R) |
| 559 | S3_Roman.12690.12832.2 | 2 | 10.97 | 94.1 | 1.54E+07 (R) |
| 628 | X4L_Roman.12428.12428. | 2 | 10.66 | 73.2 | 2.51E+06 (R) |
| 743 | X4R_Roman.12765.12908. | 2 | 10.2  | 85   | 1.84E+06 (K) |
| 768 | S3_Roman.12543.12543.2 | 2 | 10.14 | 70.4 | 1.54E+07 (R) |
| 390 | X4L_Roman.3689.3689.2  | 2 | 11.87 | 74   | 1.79E+06 (R) |
| 399 | S5_Roman.3848.3848.3   | 3 | 11.82 | 77.2 | 1.58E+07 (R) |
| 509 | S3_Roman.3886.3886.2   | 2 | 11.23 | 77.3 | 7.14E+05 (R) |
| 173 | L3_Roman.4846.4846.2   | 2 | 14.11 | 80.9 | 2.32E+07 (R) |
| 235 | S1_Roman.5133.5133.2   | 2 | 13.26 | 79   | 2.92E+07 (R) |
| 279 | X4L_Roman.4907.4907.2  | 2 | 12.75 | 79.3 | 1.42E+07 (R) |
| 311 | S3_Roman.5194.5194.2   | 2 | 12.4  | 74.5 | 2.67E+07 (R) |
| 332 | S5_Roman.5155.5155.2   | 2 | 12.28 | 76.7 | 8.60E+06 (R) |
| 428 | S4_Roman.4876.4876.2   | 2 | 11.59 | 76   | 9.82E+06 (R) |
| 791 | S2_Roman.4752.4880.2   | 2 | 10.06 | 70.6 | 1.22E+07 (R) |
| 568 | L3_Roman.4229.4496.2   | 2 | 10.92 | 73.3 | 6.86E+06 (R) |
| 698 | S1_Roman.4527.4789.2   | 2 | 10.35 | 82   | 5.88E+06 (R) |
| 4   | S5_Roman.9768.10173.2  | 2 | 21.32 | 97.9 | 6.94E+07 (R) |
| 5   | S1_Roman.9857.10121.2  | 2 | 21.09 | 98.3 | 8.97E+07 (R) |
| 6   | S2_Roman.9462.9724.2   | 2 | 20.86 | 98.9 | 6.35E+07 (R) |
| 11  | X4L_Roman.9912.10206.2 | 2 | 20.22 | 95.8 | 1.77E+07 (R) |
| 14  | X4R_Roman.10173.10447. | 2 | 20.09 | 98.5 | 1.96E+07 (R) |
| 37  | X3R_Roman.9964.10089.2 | 2 | 18.39 | 93.1 | 5.05E+06 (R) |
| 47  | L1_Roman.9710.9861.2   | 2 | 17.68 | 84.5 | 1.99E+06 (R) |
| 79  | X2L_Roman.9846.9846.2  | 2 | 16.21 | 88.4 | 2.00E+06 (R) |
| 194 | L4_Roman.9957.9957.2   | 2 | 13.71 | 70.4 | 1.74E+06 (R) |
| 209 | X3L_Roman.10082.10225. | 2 | 13.49 | 79   | 3.21E+06 (R) |
| 437 | X1L_Roman.9839.9839.2  | 2 | 11.53 | 71.4 | 8.61E+05 (R) |
| 480 | X1R_Roman.10170.10170. | 2 | 11.32 | 77.6 | 1.04E+06 (R) |
| 613 | X2R_Roman.9579.9579.2  | 2 | 10.72 | 72.8 | 1.45E+06 (R) |
| 103 | X4L_Roman.26352.26352. | 3 | 15.57 | 76.6 | 7.29E+05 (R) |
| 434 | S4_Roman.26024.26024.3 | 3 | 11.56 | 74   | 6.54E+05 (R) |
| 196 | S5_Roman.26536.26536.3 | 3 | 13.67 | 85.4 | 5.72E+05 (R) |
| 243 | L3_Roman.25599.25740.3 | 3 | 13.1  | 70.9 | 1.54E+06 (R) |
| 573 | S2_Roman.25393.25393.3 | 3 | 10.87 | 75.1 | 1.02E+06 (R) |



|     |                         |   |       |      |              |
|-----|-------------------------|---|-------|------|--------------|
| 35  | S2_Roman.22717.22851.3  | 3 | 18.41 | 83.9 | 4.44E+06 (R) |
| 57  | S5_Roman.23623.23881.3  | 3 | 17.08 | 84   | 1.97E+06 (R) |
| 58  | S1_Roman.23199.23449.3  | 3 | 17.05 | 85.3 | 6.42E+06 (R) |
| 84  | X4L_Roman.23832.23832.3 | 3 | 16.15 | 73.6 | 1.01E+06 (R) |
| 97  | S4_Roman.23191.23468.3  | 3 | 15.74 | 88.1 | 5.33E+06 (R) |
| 98  | S3_Roman.23607.23861.3  | 3 | 15.71 | 81.9 | 1.62E+06 (R) |
| 115 | L3_Roman.22981.23238.3  | 3 | 15.24 | 76.6 | 1.72E+06 (R) |
| 172 | S4_Roman.23338.23338.3  | 3 | 14.12 | 80.5 | 5.33E+06 (R) |
| 392 | X4R_Roman.23743.23743.3 | 3 | 11.86 | 70.4 | 1.27E+06 (R) |
| 161 | S4_Roman.9309.9736.2    | 2 | 14.29 | 91.3 | 8.60E+07 (R) |
| 241 | L3_Roman.9217.9774.2    | 2 | 13.12 | 92.8 | 1.61E+08 (R) |
| 713 | X3R_Roman.22948.22948.3 | 3 | 10.28 | 87.5 | 2.56E+04 (R) |
| 808 | L3_Roman.45857.45857.3  | 3 | 10.01 | 72.2 | 3.66E+03 (R) |
| 159 | L1_Roman.23363.23490.2  | 2 | 14.32 | 80.5 | 3.12E+06 (R) |
| 165 | X4R_Roman.23898.24299.2 | 2 | 14.18 | 81.3 | 7.62E+06 (R) |
| 184 | S3_Roman.25589.26346.2  | 2 | 13.84 | 79.1 | 1.07E+08 (R) |
| 233 | X4L_Roman.24192.24320.2 | 2 | 13.3  | 83.6 | 9.76E+06 (R) |
| 249 | S3_Roman.23984.24238.2  | 2 | 13.01 | 77   | 1.76E+07 (R) |
| 262 | X3R_Roman.24967.25114.2 | 2 | 12.89 | 86.4 | 9.92E+06 (R) |
| 263 | S1_Roman.23509.23873.2  | 2 | 12.87 | 79.4 | 2.63E+07 (R) |
| 280 | S5_Roman.25996.26508.2  | 2 | 12.71 | 78.8 | 1.32E+08 (R) |
| 290 | X3L_Roman.23755.24002.2 | 2 | 12.62 | 80.1 | 5.97E+06 (R) |
| 302 | S2_Roman.23022.23269.2  | 2 | 12.48 | 80.1 | 1.84E+07 (R) |
| 304 | X4R_Roman.25707.26085.2 | 2 | 12.48 | 81.9 | 2.27E+07 (R) |
| 310 | X4L_Roman.26051.26305.2 | 2 | 12.41 | 82.4 | 2.34E+07 (R) |
| 318 | S2_Roman.24603.25218.2  | 2 | 12.36 | 78.9 | 1.50E+08 (R) |
| 328 | S4_Roman.23650.23926.2  | 2 | 12.29 | 82.2 | 2.76E+07 (R) |
| 329 | S5_Roman.24272.25868.2  | 2 | 12.29 | 85   | 1.32E+08 (R) |
| 334 | L3_Roman.23318.23701.2  | 2 | 12.27 | 77.9 | 4.22E+07 (R) |
| 347 | S1_Roman.25212.25975.2  | 2 | 12.2  | 80.1 | 2.24E+08 (R) |
| 560 | X3R_Roman.22813.22937.2 | 2 | 10.97 | 74.8 | 7.14E+06 (R) |
| 583 | S5_Roman.22591.24125.2  | 2 | 10.84 | 76   | 1.00E+07 (R) |
| 598 | S3_Roman.18959.18959.2  | 2 | 10.78 | 75.3 | 1.92E+06 (R) |
| 625 | X3L_Roman.25700.25951.2 | 2 | 10.67 | 72.7 | 9.98E+06 (R) |
| 715 | X3L_Roman.24125.25578.2 | 2 | 10.27 | 94.8 | 9.98E+06 (R) |
| 794 | X4L_Roman.24447.25925.2 | 2 | 10.05 | 90.3 | 2.34E+07 (R) |
| 765 | L2_Roman.8992.9166.3    | 3 | 10.14 | 84.7 | 6.16E+06 (K) |
| 674 | X1L_Roman.13062.13203.2 | 2 | 10.42 | 70.7 | 1.21E+06 (R) |
| 190 | X2L_Roman.8086.8478.2   | 2 | 13.78 | 78.9 | 1.48E+07 (K) |
| 297 | S3_Roman.8483.8738.2    | 2 | 12.52 | 79.2 | 1.78E+07 (K) |
| 426 | S1_Roman.8517.8783.2    | 2 | 11.61 | 75.8 | 2.00E+07 (K) |
| 429 | X1R_Roman.8503.8905.2   | 2 | 11.59 | 79.9 | 1.78E+07 (K) |
| 604 | S4_Roman.7996.8286.2    | 2 | 10.76 | 79.5 | 1.60E+07 (K) |
| 687 | X4L_Roman.8333.8761.2   | 2 | 10.39 | 75.7 | 2.11E+07 (K) |
| 533 | S3_Roman.6989.7117.2    | 2 | 11.1  | 94.5 | 3.34E+07 (K) |
| 751 | S1_Roman.6976.7101.2    | 2 | 10.18 | 91.4 | 2.54E+07 (K) |
| 593 | X5R_Roman.11377.11377.3 | 3 | 10.8  | 83.2 | 8.57E+05 (K) |

|     |                         |   |       |      |              |
|-----|-------------------------|---|-------|------|--------------|
| 665 | X5R_Roman.11068.11068.  | 3 | 10.47 | 83.3 | 8.57E+05 (K) |
| 584 | X2L_Roman.10138.10264.: | 2 | 10.84 | 87.3 | 2.82E+06 (R) |
| 597 | L5_Roman.9554.9698.2    | 2 | 10.78 | 86.8 | 1.28E+06 (R) |
| 270 | S1_Roman.16414.16545.2  | 2 | 12.8  | 76   | 8.52E+06 (R) |
| 379 | X3L_Roman.16424.16680.: | 2 | 11.95 | 80.7 | 8.75E+06 (R) |
| 580 | X4L_Roman.16372.16501.: | 2 | 10.85 | 72.4 | 6.85E+06 (R) |
| 780 | X4R_Roman.16466.16728.  | 2 | 10.11 | 76.9 | 7.74E+06 (R) |
| 798 | S1_Roman.16679.16679.2  | 2 | 10.03 | 84.8 | 8.51E+06 (R) |
| 757 | X5R_Roman.47183.48384.  | 3 | 10.18 | 78.6 | 3.45E+06 (K) |
| 767 | S1_Roman.46004.46004.3  | 3 | 10.14 | 86.2 | 3.99E+07 (K) |
| 805 | S5_Roman.5268.5268.2    | 2 | 10.02 | 75.3 | 9.84E+05 (R) |
| 445 | X5R_Roman.4098.4098.2   | 2 | 11.47 | 74.5 | 1.07E+07 (K) |
| 400 | X2L_Roman.15414.16325.: | 2 | 11.82 | 92.6 | 5.32E+05 (-) |
| 406 | X3R_Roman.14638.14879.  | 2 | 11.79 | 81.5 | 6.43E+05 (-) |
| 438 | L5_Roman.15196.15459.2  | 2 | 11.51 | 89.7 | 9.10E+05 (-) |
| 468 | L1_Roman.15270.15412.2  | 2 | 11.36 | 84.9 | 3.36E+05 (-) |
| 786 | X2L_Roman.16183.16183.: | 2 | 10.08 | 76.2 | 5.32E+05 (-) |
| 618 | S4_Roman.13067.13345.2  | 2 | 10.71 | 81.1 | 3.56E+06 (K) |
| 365 | S4_Roman.24585.25891.2  | 2 | 12.08 | 89.7 | 6.56E+07 (K) |
| 608 | S1_Roman.24542.25510.2  | 2 | 10.74 | 93.9 | 3.11E+07 (K) |
| 500 | L5_Roman.18337.19831.2  | 2 | 11.27 | 72.2 | 1.14E+06 (K) |
| 704 | L5_Roman.19063.19063.2  | 2 | 10.3  | 76   | 9.31E+05 (K) |
| 803 | S1_Roman.3632.3751.2    | 2 | 10.02 | 91.1 | 4.69E+06 (K) |
| 707 | X4L_Roman.23658.23658.: | 3 | 10.3  | 88.1 | 3.11E+05 (R) |
| 637 | X1L_Roman.13576.13858.: | 2 | 10.63 | 76.4 | 1.26E+07 (R) |
| 737 | L4_Roman.13629.13774.2  | 2 | 10.21 | 78.7 | 5.44E+06 (R) |
| 108 | L5_Roman.26053.26251.2  | 2 | 15.47 | 88.3 | 4.00E+06 (R) |
| 134 | X3L_Roman.26254.26553.: | 2 | 14.83 | 84.9 | 1.02E+07 (R) |
| 201 | S3_Roman.26647.26775.2  | 2 | 13.61 | 76.8 | 2.18E+06 (R) |
| 221 | L3_Roman.26013.26205.2  | 2 | 13.4  | 83.3 | 5.62E+06 (R) |
| 283 | L4_Roman.26185.26517.2  | 2 | 12.68 | 79.1 | 3.42E+06 (R) |
| 403 | S5_Roman.26744.27003.2  | 2 | 11.8  | 84   | 3.61E+06 (R) |
| 418 | S2_Roman.25669.25920.2  | 2 | 11.68 | 79.8 | 9.81E+06 (R) |
| 558 | X2R_Roman.26158.26285.  | 2 | 10.98 | 82   | 7.04E+06 (R) |
| 641 | X3R_Roman.25347.25417.  | 2 | 10.6  | 74.9 | 2.59E+06 (R) |
| 238 | X2R_Roman.13640.13914.  | 2 | 13.23 | 71.2 | 1.04E+06 (K) |
| 307 | X5R_Roman.13821.14098.  | 2 | 12.43 | 72.8 | 2.96E+06 (K) |
| 461 | X4R_Roman.14212.14615.  | 2 | 11.41 | 71.5 | 6.02E+06 (K) |
| 531 | L3_Roman.13664.13935.2  | 2 | 11.11 | 73.3 | 9.41E+06 (K) |
| 629 | X3R_Roman.13304.13600.  | 2 | 10.65 | 72.5 | 4.74E+06 (K) |
| 788 | X1R_Roman.14291.14565.  | 2 | 10.07 | 74.9 | 4.23E+06 (K) |
| 804 | S4_Roman.13779.14061.2  | 2 | 10.02 | 72.4 | 8.99E+06 (K) |
| 451 | S2_Roman.18343.18481.2  | 2 | 11.45 | 75.5 | 3.54E+07 (R) |
| 745 | S2_Roman.19262.20511.2  | 2 | 10.19 | 70.4 | 2.18E+06 (R) |
| 371 | X4L_Roman.18912.18912.: | 2 | 12.01 | 71.6 | 3.69E+07 (K) |
| 695 | X1R_Roman.19045.19315.  | 2 | 10.37 | 78.7 | 4.88E+07 (K) |
| 672 | X4L_Roman.20588.20588.: | 2 | 10.43 | 88.7 | 1.88E+06 (K) |

|     |                         |   |       |      |              |
|-----|-------------------------|---|-------|------|--------------|
| 634 | X2L_Roman.35065.35403.: | 3 | 10.64 | 86.5 | 4.85E+06 (R) |
| 670 | L4_Roman.35546.35584.3  | 3 | 10.44 | 89.7 | 4.81E+06 (R) |
| 316 | S5_Roman.33413.33658.2  | 2 | 12.38 | 90.6 | 3.96E+06 (R) |
| 330 | X2L_Roman.32307.32545.: | 2 | 12.29 | 87.7 | 1.07E+06 (R) |
| 342 | X2R_Roman.32952.33069.  | 2 | 12.22 | 86.9 | 6.76E+05 (R) |
| 433 | X5R_Roman.33026.33839.  | 2 | 11.57 | 94.5 | 1.55E+08 (R) |
| 473 | X1R_Roman.32956.33637.  | 2 | 11.34 | 83.7 | 1.73E+08 (R) |
| 498 | X1L_Roman.33511.34558.: | 2 | 11.28 | 84.6 | 1.61E+08 (R) |
| 530 | X4L_Roman.33185.33427.: | 2 | 11.12 | 84   | 2.11E+07 (R) |
| 599 | X3L_Roman.32696.32924.: | 2 | 10.78 | 83.6 | 2.11E+07 (R) |
| 600 | X1R_Roman.32824.33761.  | 2 | 10.77 | 85.1 | 2.77E+08 (R) |
| 656 | S2_Roman.31909.32138.2  | 2 | 10.49 | 87.5 | 1.61E+05 (R) |
| 423 | S1_Roman.32593.32820.2  | 2 | 11.64 | 87   | 2.77E+06 (R) |
| 458 | L3_Roman.32992.33248.2  | 2 | 11.41 | 86.7 | 7.74E+06 (R) |
| 689 | L5_Roman.32592.32834.2  | 2 | 10.38 | 83.7 | 1.13E+06 (R) |
| 528 | S3_Roman.32774.33012.2  | 2 | 11.12 | 83.6 | 2.19E+06 (R) |
| 448 | X4R_Roman.7154.7280.2   | 2 | 11.46 | 90.3 | 1.42E+07 (K) |
| 723 | X4L_Roman.10019.10019.: | 2 | 10.24 | 72.5 | 6.54E+05 (K) |
| 557 | L1_Roman.9816.9816.2    | 2 | 10.98 | 76.7 | 1.07E+06 (K) |
| 693 | S4_Roman.9282.9423.2    | 2 | 10.37 | 70.8 | 2.18E+06 (K) |
| 771 | L5_Roman.9473.9473.2    | 2 | 10.13 | 72.8 | 1.76E+05 (K) |
| 353 | S1_Roman.9944.10070.2   | 2 | 12.15 | 73.1 | 3.58E+06 (R) |
| 671 | X2R_Roman.9513.9513.2   | 2 | 10.44 | 76   | 7.86E+05 (R) |
| 739 | X1R_Roman.10231.10231.  | 2 | 10.21 | 90.2 | 1.09E+06 (R) |
| 749 | X2L_Roman.9790.9790.2   | 2 | 10.19 | 72.7 | 6.05E+05 (R) |
| 752 | S2_Roman.9649.9649.2    | 2 | 10.18 | 71.5 | 1.22E+06 (R) |
| 678 | S2_Roman.14056.14305.2  | 2 | 10.41 | 88   | 7.50E+06 (K) |
| 463 | X3L_Roman.22103.22103.: | 2 | 11.39 | 77.5 | 2.88E+05 (K) |
| 564 | S4_Roman.22043.22043.2  | 2 | 10.94 | 82.1 | 2.25E+05 (K) |
| 506 | L5_Roman.36213.37591.2  | 2 | 11.24 | 73.5 | 4.88E+06 (K) |
| 482 | L3_Roman.33574.33574.3  | 3 | 11.31 | 71.8 | 8.81E+05 (R) |
| 714 | L1_Roman.44575.44575.3  | 3 | 10.27 | 73.9 | 1.00E+06 (R) |
| 386 | X2R_Roman.15398.16286.  | 2 | 11.9  | 87.2 | 6.99E+05 (-) |
| 255 | S2_Roman.26005.26432.2  | 2 | 12.96 | 89.2 | 2.69E+07 (R) |
| 337 | X2L_Roman.26069.26459.: | 2 | 12.26 | 89.5 | 6.88E+07 (R) |
| 296 | S1_Roman.16463.16593.3  | 3 | 12.54 | 79.4 | 1.87E+06 (R) |
| 675 | X3L_Roman.15306.15553.: | 2 | 10.42 | 87.9 | 4.64E+06 (K) |
| 553 | X3L_Roman.12308.12558.: | 2 | 11.01 | 91.5 | 1.82E+07 (R) |
| 682 | X1R_Roman.15225.15515.  | 2 | 10.4  | 86.4 | 5.62E+06 (K) |
| 684 | S5_Roman.15191.15621.2  | 2 | 10.39 | 87.3 | 3.64E+07 (K) |
| 515 | S2_Roman.26002.26068.3  | 3 | 11.17 | 85.9 | 1.32E+06 (R) |
| 407 | L3_Roman.44626.44626.3  | 3 | 11.77 | 70.2 | 1.82E+05 (R) |
| 585 | X2R_Roman.16358.16358.  | 2 | 10.84 | 78.6 | 1.50E+06 (R) |
| 408 | X2L_Roman.11811.12087.: | 2 | 11.77 | 92.6 | 1.46E+07 (K) |
| 540 | X1R_Roman.12245.12385.  | 2 | 11.07 | 94.1 | 4.03E+07 (K) |
| 570 | L3_Roman.9730.11384.2   | 2 | 10.9  | 86.7 | 2.74E+07 (K) |
| 633 | S5_Roman.12144.12437.2  | 2 | 10.64 | 97.3 | 4.06E+07 (K) |

|     |                         |   |       |      |              |
|-----|-------------------------|---|-------|------|--------------|
| 648 | X4L_Roman.12158.12295.2 | 2 | 10.56 | 94   | 2.17E+07 (K) |
| 679 | X3R_Roman.11977.11977.2 | 2 | 10.41 | 88.8 | 6.43E+06 (K) |
| 722 | X1R_Roman.10506.12099.2 | 2 | 10.25 | 82.8 | 4.03E+07 (K) |
| 8   | X4L_Roman.30655.32012.2 | 2 | 20.64 | 97.7 | 4.00E+08 (-) |
| 10  | S2_Roman.29341.30708.2  | 2 | 20.4  | 98   | 6.08E+08 (-) |
| 12  | X3R_Roman.29747.30336.2 | 2 | 20.12 | 97.5 | 9.74E+07 (-) |
| 13  | X3L_Roman.30141.31251.2 | 2 | 20.09 | 97.2 | 1.48E+08 (-) |
| 16  | L3_Roman.30019.31499.2  | 2 | 19.94 | 99   | 8.86E+08 (-) |
| 18  | S1_Roman.30076.31216.2  | 2 | 19.92 | 98.3 | 9.48E+08 (-) |
| 20  | S3_Roman.30465.31751.2  | 2 | 19.89 | 97.9 | 6.94E+08 (-) |
| 21  | S4_Roman.30211.31637.2  | 2 | 19.86 | 97.2 | 8.19E+08 (-) |
| 22  | X4R_Roman.30489.31638.2 | 2 | 19.85 | 97.2 | 3.33E+08 (-) |
| 25  | L1_Roman.30489.30863.2  | 2 | 19.57 | 96.7 | 3.83E+07 (-) |
| 26  | S5_Roman.30826.32056.2  | 2 | 19.38 | 97.7 | 7.26E+08 (-) |
| 32  | L5_Roman.30803.30934.2  | 2 | 19.11 | 93.4 | 2.93E+06 (-) |
| 43  | X2R_Roman.30939.31305.2 | 2 | 18.12 | 93.1 | 1.10E+07 (-) |
| 48  | L4_Roman.30905.31279.2  | 2 | 17.64 | 93.8 | 2.28E+07 (-) |
| 49  | X2L_Roman.30371.30735.2 | 2 | 17.62 | 92.8 | 1.88E+07 (-) |
| 64  | X1L_Roman.31838.32122.2 | 2 | 16.85 | 91.2 | 2.52E+06 (-) |
| 87  | L3_Roman.31617.32687.2  | 2 | 16.04 | 96.8 | 3.68E+08 (-) |
| 99  | X5R_Roman.31353.31599.2 | 2 | 15.71 | 90.2 | 3.83E+06 (-) |
| 107 | X1R_Roman.31304.31543.2 | 2 | 15.5  | 89.5 | 6.31E+06 (-) |
| 109 | S4_Roman.31756.32599.2  | 2 | 15.42 | 88.9 | 4.40E+08 (-) |
| 118 | S1_Roman.31337.32024.2  | 2 | 15.2  | 90.1 | 6.63E+08 (-) |
| 122 | S5_Roman.32176.32820.2  | 2 | 15.12 | 87.3 | 4.44E+08 (-) |
| 176 | S3_Roman.31864.32262.2  | 2 | 14.02 | 88.2 | 2.39E+08 (-) |
| 195 | L2_Roman.31636.31753.2  | 2 | 13.68 | 89.5 | 3.18E+06 (-) |
| 205 | S1_Roman.29945.29945.2  | 2 | 13.54 | 83   | 5.65E+08 (-) |
| 274 | S1_Roman.32193.32193.2  | 2 | 12.79 | 70.6 | 1.98E+06 (-) |
| 327 | L3_Roman.30229.30229.2  | 2 | 12.29 | 86.4 | 6.84E+08 (-) |
| 345 | X3R_Roman.29628.29628.2 | 2 | 12.21 | 77.9 | 9.74E+07 (-) |
| 431 | X5R_Roman.31739.31739.2 | 2 | 11.58 | 80.6 | 3.83E+06 (-) |
| 522 | S3_Roman.30328.30328.2  | 2 | 11.14 | 76.6 | 3.89E+08 (-) |
| 524 | X4R_Roman.30637.30637.2 | 2 | 11.14 | 76.9 | 2.43E+08 (-) |
| 622 | S4_Roman.32726.32726.2  | 2 | 10.68 | 76.5 | 2.99E+06 (-) |
| 638 | S5_Roman.30708.30708.2  | 2 | 10.62 | 80.9 | 3.96E+08 (-) |
| 676 | X3R_Roman.30449.30449.2 | 2 | 10.42 | 77.7 | 9.74E+07 (-) |
| 740 | X1R_Roman.31672.31672.2 | 2 | 10.21 | 73   | 6.31E+06 (-) |
| 421 | S5_Roman.45074.45074.3  | 3 | 11.66 | 79.9 | 7.15E+03 (-) |
| 94  | S2_Roman.29711.29711.2  | 2 | 15.77 | 88.4 | 6.06E+05 (-) |
| 102 | L3_Roman.30266.30395.2  | 2 | 15.62 | 91.2 | 7.79E+05 (-) |
| 177 | S5_Roman.31080.31080.2  | 2 | 14.02 | 88.5 | 9.26E+05 (-) |
| 189 | S3_Roman.30776.30776.2  | 2 | 13.78 | 88.4 | 4.81E+05 (-) |
| 614 | X3R_Roman.12083.12230.2 | 2 | 10.72 | 83.6 | 1.26E+06 (R) |
| 705 | S5_Roman.12605.12751.2  | 2 | 10.3  | 86.4 | 3.04E+06 (R) |
| 696 | L3_Roman.10963.11353.2  | 2 | 10.36 | 83.2 | 1.34E+07 (K) |
| 601 | X4R_Roman.16455.16583.2 | 2 | 10.77 | 79.2 | 2.85E+05 (R) |

|     |                         |   |       |      |              |
|-----|-------------------------|---|-------|------|--------------|
| 360 | S1_Roman.26487.26651.2  | 2 | 12.12 | 71.3 | 2.06E+06 (R) |
| 139 | S2_Roman.16088.16220.2  | 2 | 14.71 | 90.1 | 3.44E+06 (K) |
| 454 | L3_Roman.14475.14612.2  | 2 | 11.44 | 90.4 | 9.30E+05 (R) |
| 621 | S2_Roman.14650.14775.2  | 2 | 10.7  | 91.4 | 6.98E+05 (R) |
| 785 | X4L_Roman.15001.15142.1 | 2 | 10.09 | 96.4 | 3.70E+05 (R) |
| 734 | X4R_Roman.29965.29980.  | 4 | 10.22 | 72.6 | 5.97E+05 (K) |
| 579 | S5_Roman.43112.43322.3  | 3 | 10.85 | 77.3 | 2.69E+07 (K) |
| 252 | S5_Roman.4494.4625.2    | 2 | 13    | 80.4 | 8.59E+05 (K) |
| 554 | S1_Roman.4505.4626.2    | 2 | 10.99 | 75.2 | 8.29E+05 (K) |
| 576 | S3_Roman.4549.4549.2    | 2 | 10.86 | 82.4 | 8.96E+05 (K) |
| 769 | S4_Roman.4229.4229.2    | 2 | 10.14 | 90.2 | 1.25E+06 (K) |
| 779 | X4L_Roman.4190.4317.2   | 2 | 10.11 | 70.3 | 1.21E+06 (K) |
| 27  | L3_Roman.6933.7326.3    | 3 | 19.26 | 88.5 | 2.70E+07 (R) |
| 29  | S3_Roman.7568.7957.3    | 3 | 19.23 | 89.2 | 4.60E+07 (R) |
| 30  | S1_Roman.7641.8033.3    | 3 | 19.17 | 91.7 | 5.67E+07 (R) |
| 39  | X3L_Roman.7754.8010.3   | 3 | 18.32 | 86.7 | 1.63E+07 (R) |
| 44  | S5_Roman.7435.7708.3    | 3 | 17.99 | 88   | 3.26E+07 (R) |
| 56  | S4_Roman.6971.7391.3    | 3 | 17.16 | 87.1 | 2.36E+07 (R) |
| 63  | X4R_Roman.7857.8122.3   | 3 | 16.9  | 86.5 | 6.82E+06 (R) |
| 76  | X4L_Roman.7478.7867.3   | 3 | 16.25 | 84.6 | 1.93E+06 (R) |
| 175 | X4L_Roman.7544.7950.2   | 2 | 14.03 | 93.4 | 1.90E+06 (R) |
| 215 | X3R_Roman.7174.7583.3   | 3 | 13.46 | 75.3 | 2.79E+06 (R) |
| 240 | S5_Roman.7517.7791.2    | 2 | 13.21 | 90.3 | 2.92E+07 (R) |
| 244 | S2_Roman.7205.7517.3    | 3 | 13.09 | 74   | 2.01E+07 (R) |
| 275 | S1_Roman.7623.8003.2    | 2 | 12.79 | 85.9 | 5.16E+07 (R) |
| 333 | X3L_Roman.7825.7959.2   | 2 | 12.28 | 86.8 | 1.55E+07 (R) |
| 355 | S3_Roman.7582.7956.2    | 2 | 12.13 | 90.9 | 3.98E+07 (R) |
| 368 | S2_Roman.7150.7539.2    | 2 | 12.02 | 92.8 | 4.47E+07 (R) |
| 401 | X3R_Roman.7269.7395.2   | 2 | 11.82 | 82.4 | 2.13E+06 (R) |
| 499 | X3L_Roman.8082.8082.2   | 2 | 11.28 | 78.7 | 1.10E+07 (R) |
| 527 | L3_Roman.6916.7313.2    | 2 | 11.12 | 86.2 | 3.00E+07 (R) |
| 551 | S4_Roman.6935.7352.2    | 2 | 11.01 | 88.3 | 3.00E+07 (R) |
| 609 | X4R_Roman.7941.8193.2   | 2 | 10.74 | 94   | 2.18E+07 (R) |
| 708 | L1_Roman.7107.7107.2    | 2 | 10.29 | 93.6 | 2.01E+07 (R) |
| 587 | S4_Roman.18888.18888.4  | 4 | 10.83 | 76   | 1.29E+05 (R) |
| 356 | S5_Roman.21916.21916.3  | 3 | 12.13 | 72.9 | 5.02E+05 (K) |
| 182 | X4R_Roman.46699.46699.  | 2 | 13.85 | 84.7 | 1.53E+05 (-) |
| 539 | S4_Roman.47525.47525.2  | 2 | 11.07 | 85   | 1.30E+05 (-) |
| 456 | X2L_Roman.24878.24878.1 | 2 | 11.44 | 75.9 | 9.14E+04 (K) |
| 284 | S4_Roman.4140.4140.3    | 3 | 12.68 | 76.5 | 8.35E+05 (R) |
| 449 | L3_Roman.4119.4119.3    | 3 | 11.45 | 79.9 | 2.10E+06 (R) |
| 464 | S2_Roman.4177.4177.3    | 3 | 11.38 | 72.1 | 1.99E+06 (R) |
| 86  | S4_Roman.3880.3885.2    | 2 | 16.05 | 84.4 | 7.06E+06 (R) |
| 158 | S1_Roman.4163.4163.3    | 3 | 14.33 | 72.2 | 3.22E+06 (R) |
| 216 | S3_Roman.4177.4177.2    | 2 | 13.45 | 81.9 | 3.39E+07 (R) |
| 395 | S5_Roman.4147.4147.4    | 4 | 11.84 | 78.3 | 5.62E+05 (R) |
| 460 | X4L_Roman.3778.3778.4   | 4 | 11.41 | 82.3 | 3.27E+05 (R) |

|     |                         |   |       |      |              |
|-----|-------------------------|---|-------|------|--------------|
| 469 | S4_Roman.3855.3855.4    | 4 | 11.36 | 85.1 | 5.20E+05 (R) |
| 472 | S2_Roman.3835.3835.3    | 3 | 11.34 | 70.5 | 4.19E+06 (R) |
| 42  | S4_Roman.17057.17179.4  | 4 | 18.24 | 97.1 | 2.21E+07 (R) |
| 105 | L3_Roman.17652.17800.4  | 4 | 15.54 | 85.1 | 1.72E+06 (R) |
| 130 | S3_Roman.17574.17574.4  | 4 | 14.92 | 90.5 | 6.28E+06 (R) |
| 131 | L3_Roman.16814.16937.4  | 4 | 14.87 | 88.4 | 1.78E+07 (R) |
| 185 | X4L_Roman.17265.17265.4 | 4 | 13.84 | 87.7 | 8.86E+06 (R) |
| 186 | S1_Roman.17604.17604.3  | 3 | 13.83 | 82.8 | 2.09E+06 (R) |
| 278 | X4R_Roman.17542.17542.4 | 4 | 12.79 | 89   | 3.90E+06 (R) |
| 372 | L3_Roman.16959.16959.2  | 2 | 12    | 74.2 | 8.56E+05 (R) |
| 712 | S3_Roman.17697.17697.4  | 4 | 10.28 | 80   | 6.28E+06 (R) |
| 127 | S2_Roman.16936.17054.4  | 4 | 15.01 | 86.9 | 8.97E+06 (R) |
| 55  | S3_Roman.4824.4824.3    | 3 | 17.17 | 92.1 | 2.38E+06 (R) |
| 312 | S5_Roman.4739.4739.3    | 3 | 12.4  | 76.3 | 3.88E+06 (R) |
| 313 | L3_Roman.4448.4448.3    | 3 | 12.39 | 75.9 | 3.82E+06 (R) |
| 143 | S5_Roman.9882.9882.4    | 4 | 14.64 | 85.9 | 3.07E+06 (R) |
| 746 | S2_Roman.9468.9468.4    | 4 | 10.19 | 78.9 | 7.22E+05 (R) |
| 69  | S5_Roman.14164.14598.4  | 4 | 16.46 | 83.5 | 2.78E+07 (R) |
| 111 | S4_Roman.13997.14144.4  | 4 | 15.37 | 85.3 | 3.28E+07 (R) |
| 251 | S2_Roman.13960.13960.4  | 4 | 13    | 81.1 | 1.50E+07 (R) |
| 286 | S2_Roman.13829.13829.4  | 4 | 12.67 | 82.5 | 1.50E+07 (R) |
| 315 | S2_Roman.14089.14089.4  | 4 | 12.39 | 81.7 | 1.50E+07 (R) |
| 364 | S4_Roman.13904.13904.3  | 3 | 12.08 | 78.5 | 6.23E+06 (R) |
| 369 | S5_Roman.15401.15401.4  | 4 | 12.02 | 76.8 | 2.96E+06 (R) |
| 380 | S4_Roman.14835.14835.4  | 4 | 11.94 | 89.5 | 3.04E+06 (R) |
| 381 | L3_Roman.13989.13989.4  | 4 | 11.93 | 74.7 | 1.85E+07 (R) |
| 413 | L3_Roman.13580.13580.4  | 4 | 11.71 | 81.6 | 1.85E+07 (R) |
| 414 | S5_Roman.14447.14447.4  | 4 | 11.71 | 78.9 | 2.78E+07 (R) |
| 466 | X4R_Roman.14426.14426.4 | 4 | 11.37 | 77.3 | 1.05E+06 (R) |
| 492 | S4_Roman.13862.13862.4  | 4 | 11.29 | 76.8 | 3.28E+07 (R) |
| 518 | X4L_Roman.14177.14177.4 | 4 | 11.17 | 78.2 | 5.56E+06 (R) |
| 535 | X3L_Roman.14617.14617.4 | 4 | 11.09 | 72.8 | 4.03E+06 (R) |
| 561 | L3_Roman.13855.13855.4  | 4 | 10.95 | 81.6 | 1.85E+07 (R) |
| 575 | L3_Roman.13857.13857.5  | 5 | 10.86 | 70.7 | 1.04E+07 (R) |
| 578 | S3_Roman.14663.14663.3  | 3 | 10.85 | 74.7 | 3.97E+05 (R) |
| 594 | S1_Roman.14481.14481.4  | 4 | 10.79 | 79.3 | 2.95E+07 (R) |
| 627 | S3_Roman.15390.15390.4  | 4 | 10.66 | 80.9 | 1.05E+06 (R) |
| 632 | S4_Roman.14047.14047.3  | 3 | 10.64 | 72.5 | 6.23E+06 (R) |
| 660 | S3_Roman.14575.14706.4  | 4 | 10.48 | 81.6 | 1.61E+07 (R) |
| 697 | S4_Roman.14125.14125.5  | 5 | 10.36 | 75.3 | 1.73E+07 (R) |
| 766 | L3_Roman.13717.13717.4  | 4 | 10.14 | 70.5 | 1.85E+07 (R) |
| 778 | X4L_Roman.14181.14181.4 | 5 | 10.11 | 73   | 3.98E+06 (R) |
| 590 | S3_Roman.18416.18416.4  | 4 | 10.81 | 74.4 | 6.60E+05 (R) |
| 646 | S4_Roman.17882.18020.4  | 4 | 10.56 | 75   | 1.51E+06 (R) |
| 226 | S4_Roman.14182.14182.5  | 5 | 13.34 | 82   | 1.18E+06 (R) |
| 230 | S3_Roman.14812.14812.5  | 5 | 13.31 | 86   | 7.98E+05 (R) |
| 288 | X4L_Roman.14448.14448.4 | 5 | 12.64 | 83.2 | 1.84E+06 (R) |

|     |                         |   |       |      |              |
|-----|-------------------------|---|-------|------|--------------|
| 417 | S1_Roman.14799.14799.5  | 5 | 11.69 | 86   | 4.57E+06 (R) |
| 636 | S5_Roman.14811.14811.5  | 5 | 10.63 | 78.6 | 9.33E+05 (R) |
| 149 | S2_Roman.36441.36659.3  | 3 | 14.49 | 85.5 | 2.65E+06 (K) |
| 223 | L1_Roman.36974.37317.3  | 3 | 13.37 | 86.9 | 1.51E+06 (K) |
| 261 | X5R_Roman.37948.38292.3 | 3 | 12.9  | 87.5 | 1.72E+06 (K) |
| 271 | X1R_Roman.37845.38177.3 | 3 | 12.8  | 86.5 | 2.57E+06 (K) |
| 382 | S3_Roman.37073.37286.3  | 3 | 11.93 | 84   | 2.11E+06 (K) |
| 457 | X2R_Roman.37245.37464.3 | 3 | 11.42 | 88.4 | 1.46E+06 (K) |
| 477 | L3_Roman.37246.37625.3  | 3 | 11.33 | 83   | 2.15E+06 (K) |
| 479 | X1L_Roman.38508.38904.3 | 3 | 11.32 | 79.5 | 3.36E+05 (K) |
| 505 | X4R_Roman.37519.37734.3 | 3 | 11.25 | 84.2 | 3.46E+06 (K) |
| 591 | L5_Roman.37300.37532.3  | 3 | 10.8  | 79.2 | 1.02E+06 (K) |
| 605 | X4L_Roman.37679.37906.3 | 3 | 10.76 | 80.7 | 1.99E+06 (K) |
| 783 | S1_Roman.36980.37096.3  | 3 | 10.1  | 78.3 | 7.35E+05 (K) |
| 606 | S3_Roman.5430.6521.3    | 3 | 10.75 | 76.4 | 4.40E+07 (R) |
| 793 | S5_Roman.5341.6468.3    | 3 | 10.05 | 75.2 | 2.50E+07 (R) |
| 718 | X2L_Roman.37825.37825.3 | 3 | 10.26 | 75.2 | 1.75E+06 (R) |
| 619 | X2R_Roman.11672.11819.2 | 2 | 10.71 | 74.9 | 1.12E+07 (R) |
| 650 | S2_Roman.11785.11912.2  | 2 | 10.55 | 73.3 | 1.56E+07 (R) |
| 731 | X1R_Roman.12246.12384.2 | 2 | 10.22 | 74.9 | 3.40E+07 (R) |
| 744 | L5_Roman.11704.11853.2  | 2 | 10.19 | 72.1 | 1.17E+07 (R) |
| 789 | X3L_Roman.12142.12416.2 | 2 | 10.07 | 76.4 | 1.52E+07 (R) |
| 658 | S4_Roman.4070.4070.2    | 2 | 10.49 | 83.1 | 2.04E+05 (R) |
| 701 | X4L_Roman.4029.4029.2   | 2 | 10.33 | 70.8 | 8.39E+04 (R) |
| 281 | X2L_Roman.26745.26874.2 | 2 | 12.71 | 74.5 | 2.26E+06 (K) |
| 644 | X3R_Roman.26489.26489.2 | 2 | 10.59 | 72.8 | 1.05E+06 (K) |
| 402 | L4_Roman.15531.15927.2  | 2 | 11.8  | 84   | 2.66E+07 (R) |
| 450 | L5_Roman.15195.15691.2  | 2 | 11.45 | 81.6 | 2.25E+07 (R) |
| 495 | X2R_Roman.15113.15616.2 | 2 | 11.29 | 83.4 | 2.84E+07 (R) |
| 508 | X2L_Roman.15088.15710.2 | 2 | 11.24 | 82.9 | 5.49E+07 (R) |
| 640 | S4_Roman.15410.15806.2  | 2 | 10.61 | 84.4 | 2.55E+07 (R) |
| 664 | X4R_Roman.16050.16301.2 | 2 | 10.47 | 84   | 1.92E+07 (R) |
| 717 | X5R_Roman.15540.15937.2 | 2 | 10.27 | 82.9 | 3.24E+07 (R) |
| 735 | L3_Roman.15334.15623.2  | 2 | 10.21 | 82.5 | 1.18E+07 (R) |
| 810 | S2_Roman.15291.15681.2  | 2 | 10.01 | 83.8 | 2.26E+07 (R) |
| 537 | X3R_Roman.8703.8703.2   | 2 | 11.08 | 84.1 | 1.47E+06 (R) |
| 772 | S2_Roman.19406.19406.2  | 2 | 10.13 | 72.5 | 1.82E+04 (R) |
| 180 | X2L_Roman.12381.12509.2 | 2 | 13.92 | 85.4 | 1.58E+06 (-) |
| 259 | L5_Roman.12054.12211.2  | 2 | 12.92 | 85.2 | 2.19E+06 (-) |
| 267 | S1_Roman.12881.13009.2  | 2 | 12.84 | 83.7 | 2.52E+06 (-) |
| 294 | L3_Roman.12237.12237.2  | 2 | 12.56 | 82.4 | 1.01E+06 (-) |
| 349 | X5R_Roman.12097.12256.2 | 2 | 12.18 | 86.1 | 6.55E+05 (-) |
| 377 | X2R_Roman.12036.12196.2 | 2 | 11.96 | 88.6 | 1.81E+06 (-) |
| 415 | X4L_Roman.12718.12864.2 | 2 | 11.71 | 73.4 | 6.72E+05 (-) |
| 443 | L2_Roman.13580.13830.2  | 2 | 11.48 | 72.8 | 6.83E+06 (-) |
| 444 | L1_Roman.12253.12398.2  | 2 | 11.47 | 81.3 | 1.39E+06 (-) |
| 446 | S2_Roman.12259.12517.2  | 2 | 11.46 | 77.6 | 1.23E+06 (-) |

|     |                         |   |       |      |              |
|-----|-------------------------|---|-------|------|--------------|
| 511 | X3R_Roman.12281.12281.  | 2 | 11.23 | 73   | 1.47E+06 (-) |
| 517 | X1R_Roman.12970.12970.  | 2 | 11.17 | 87.6 | 6.22E+05 (-) |
| 543 | L4_Roman.12529.12529.2  | 2 | 11.05 | 82.2 | 1.07E+06 (-) |
| 563 | X3L_Roman.12939.13068.: | 2 | 10.95 | 77.8 | 2.82E+06 (-) |
| 624 | S4_Roman.12167.12167.2  | 2 | 10.67 | 86.3 | 8.91E+05 (-) |
| 639 | X1L_Roman.12353.12511.: | 2 | 10.62 | 85   | 1.10E+06 (-) |
| 668 | S4_Roman.12317.12317.2  | 2 | 10.45 | 86.1 | 8.91E+05 (-) |
| 623 | L3_Roman.9115.9381.2    | 2 | 10.67 | 82   | 2.49E+07 (K) |
| 681 | L1_Roman.9312.9735.2    | 2 | 10.4  | 82.7 | 3.30E+07 (K) |
| 762 | X2L_Roman.9407.9657.2   | 2 | 10.15 | 82.6 | 1.86E+07 (K) |
| 293 | L2_Roman.18826.18826.3  | 3 | 12.56 | 76   | 1.90E+06 (R) |
| 490 | L2_Roman.18960.18960.3  | 3 | 11.29 | 83   | 1.90E+06 (R) |
| 719 | X2R_Roman.9023.9456.2   | 2 | 10.26 | 83.9 | 1.22E+07 (R) |
| 736 | L3_Roman.4658.4804.2    | 2 | 10.21 | 74.1 | 4.12E+06 (K) |
| 317 | S2_Roman.4286.4415.2    | 2 | 12.37 | 90.4 | 3.60E+07 (K) |
| 331 | S3_Roman.4674.4807.2    | 2 | 12.28 | 92.2 | 4.23E+07 (K) |
| 370 | S1_Roman.4524.4655.2    | 2 | 12.01 | 87.7 | 2.48E+07 (K) |
| 388 | L3_Roman.4201.4602.2    | 2 | 11.88 | 91.7 | 1.12E+08 (K) |
| 405 | S4_Roman.4216.4470.2    | 2 | 11.79 | 88.9 | 4.54E+07 (K) |
| 544 | X4R_Roman.4792.5038.2   | 2 | 11.05 | 89.6 | 3.44E+07 (K) |
| 611 | X3L_Roman.4690.4817.2   | 2 | 10.73 | 84.4 | 1.00E+07 (K) |
| 366 | X4R_Roman.11256.11256.  | 3 | 12.08 | 83.6 | 6.82E+05 (K) |
| 615 | X3R_Roman.7272.7524.2   | 2 | 10.72 | 77.8 | 8.01E+06 (K) |
| 631 | S1_Roman.8422.8550.3    | 3 | 10.64 | 73.8 | 1.84E+06 (K) |
| 710 | X4R_Roman.8235.8577.3   | 3 | 10.29 | 73.5 | 2.04E+06 (K) |
| 324 | S3_Roman.4307.4581.2    | 2 | 12.32 | 92.1 | 4.78E+07 (K) |
| 439 | S5_Roman.4312.4570.2    | 2 | 11.51 | 93.4 | 2.48E+07 (K) |
| 470 | S4_Roman.4027.4169.2    | 2 | 11.36 | 89.8 | 5.72E+07 (K) |
| 536 | S1_Roman.4258.4500.2    | 2 | 11.08 | 89.4 | 7.43E+07 (K) |
| 774 | X2R_Roman.45134.45134.  | 3 | 10.13 | 83.9 | 1.85E+05 (K) |
| 404 | L4_Roman.7154.7419.2    | 2 | 11.79 | 74.5 | 1.23E+07 (R) |
| 391 | X4R_Roman.14111.14251.  | 2 | 11.86 | 79.8 | 4.74E+04 (K) |
| 546 | S3_Roman.14192.14493.2  | 2 | 11.03 | 75.2 | 4.69E+05 (K) |
| 603 | S4_Roman.14030.14030.2  | 2 | 10.76 | 82   | 1.83E+06 (K) |
| 758 | X3L_Roman.14084.14211.: | 2 | 10.17 | 85.5 | 1.77E+05 (K) |
| 777 | X3R_Roman.13253.13394.  | 2 | 10.11 | 89.9 | 3.06E+05 (K) |
| 792 | X4L_Roman.14186.14186.: | 2 | 10.06 | 72.8 | 3.94E+05 (K) |
| 673 | L1_Roman.13781.13781.2  | 2 | 10.42 | 80.7 | 1.24E+05 (K) |
| 795 | S2_Roman.13844.13844.2  | 2 | 10.04 | 72.1 | 4.24E+05 (K) |
| 588 | X3R_Roman.15742.15742.  | 4 | 10.82 | 71.4 | 1.51E+06 (R) |
| 308 | L5_Roman.18855.18979.4  | 4 | 12.41 | 71.2 | 8.55E+06 (R) |
| 341 | X2R_Roman.30585.30822.  | 2 | 12.22 | 86.6 | 5.65E+05 (K) |
| 733 | X4L_Roman.31021.31252.: | 2 | 10.22 | 75.9 | 1.20E+06 (K) |
| 651 | X1L_Roman.32587.32950.: | 2 | 10.52 | 76.9 | 3.94E+06 (K) |
| 291 | X3R_Roman.25290.25439.  | 2 | 12.59 | 88.5 | 3.67E+05 (R) |
| 441 | S4_Roman.5823.5979.2    | 2 | 11.5  | 78.9 | 7.49E+05 (R) |
| 217 | S5_Roman.17184.17584.2  | 2 | 13.44 | 87.1 | 2.97E+06 (R) |



|     |                         |   |       |      |              |
|-----|-------------------------|---|-------|------|--------------|
| 231 | X4L_Roman.16997.17268.2 | 2 | 13.31 | 77.3 | 1.25E+06 (R) |
| 301 | X2R_Roman.16392.16518.2 | 2 | 12.49 | 83.2 | 5.14E+05 (R) |
| 336 | X4R_Roman.17292.17545.2 | 2 | 12.27 | 76.6 | 3.82E+06 (R) |
| 361 | X2L_Roman.16412.16539.2 | 2 | 12.12 | 78.7 | 6.27E+05 (R) |
| 383 | X3L_Roman.17240.17490.2 | 2 | 11.93 | 81.4 | 3.73E+06 (R) |
| 412 | S4_Roman.16622.16887.2  | 2 | 11.72 | 94.3 | 2.98E+06 (R) |
| 491 | S1_Roman.17186.17426.2  | 2 | 11.29 | 73.5 | 4.08E+06 (R) |
| 552 | X1R_Roman.17277.17420.2 | 2 | 11.01 | 71.4 | 5.33E+05 (R) |
| 663 | X3R_Roman.15913.15913.2 | 2 | 10.47 | 82.6 | 9.98E+05 (R) |
| 700 | S3_Roman.17081.17448.2  | 2 | 10.33 | 85.8 | 3.74E+06 (R) |
| 246 | X2R_Roman.10151.10300.2 | 2 | 13.06 | 82.4 | 3.47E+06 (K) |
| 253 | X1R_Roman.10852.10997.2 | 2 | 13    | 86.8 | 9.29E+06 (K) |
| 260 | L1_Roman.10387.10535.2  | 2 | 12.9  | 84.2 | 1.00E+07 (K) |
| 300 | X3R_Roman.10668.10813.2 | 2 | 12.5  | 85.3 | 4.35E+06 (K) |
| 335 | S2_Roman.10249.10500.2  | 2 | 12.27 | 86.7 | 2.07E+07 (K) |
| 348 | L4_Roman.10502.10628.2  | 2 | 12.19 | 84.8 | 4.25E+06 (K) |
| 367 | L2_Roman.11581.11581.2  | 2 | 12.02 | 82.7 | 2.82E+06 (K) |
| 373 | X3L_Roman.10777.11025.2 | 2 | 11.99 | 81.4 | 1.08E+07 (K) |
| 393 | L3_Roman.10200.10347.2  | 2 | 11.85 | 86.5 | 7.73E+06 (K) |
| 420 | X4R_Roman.10920.11059.2 | 2 | 11.67 | 77.2 | 6.80E+06 (K) |
| 435 | S3_Roman.10765.11027.2  | 2 | 11.54 | 80.3 | 1.76E+07 (K) |
| 516 | S5_Roman.10721.11005.2  | 2 | 11.17 | 82.7 | 2.85E+07 (K) |
| 549 | S4_Roman.10170.10442.2  | 2 | 11.02 | 82   | 2.02E+07 (K) |
| 565 | X2L_Roman.10401.10672.2 | 2 | 10.94 | 82.9 | 9.79E+06 (K) |
| 574 | S2_Roman.9634.9634.2    | 2 | 10.87 | 85.5 | 1.92E+07 (K) |
| 711 | S1_Roman.10693.10942.2  | 2 | 10.28 | 82.1 | 7.02E+07 (K) |
| 721 | L2_Roman.11711.11711.2  | 2 | 10.25 | 79.3 | 2.82E+06 (K) |
| 797 | X4L_Roman.10742.10742.2 | 2 | 10.04 | 76.4 | 4.00E+06 (K) |
| 655 | X1L_Roman.13107.13107.2 | 2 | 10.5  | 72.7 | 4.86E+05 (R) |
| 419 | X2R_Roman.26829.26960.3 | 3 | 11.68 | 76.9 | 7.45E+05 (K) |
| 484 | X4R_Roman.27163.27288.3 | 3 | 11.31 | 79   | 9.61E+05 (K) |
| 503 | L5_Roman.26677.26800.3  | 3 | 11.26 | 73.4 | 1.10E+06 (K) |
| 510 | X3L_Roman.26954.26954.3 | 3 | 11.23 | 75.9 | 1.59E+05 (K) |
| 645 | L1_Roman.26373.26523.3  | 3 | 10.57 | 77.2 | 1.61E+05 (K) |
| 730 | X1L_Roman.27424.27661.3 | 3 | 10.22 | 75.1 | 5.07E+04 (K) |
| 764 | L2_Roman.27386.27644.3  | 3 | 10.14 | 74.5 | 1.89E+06 (K) |
| 727 | L3_Roman.7130.7395.2    | 2 | 10.22 | 80.3 | 7.17E+06 (R) |
| 796 | S3_Roman.10371.10371.2  | 2 | 10.04 | 84.2 | 8.68E+05 (R) |
| 630 | L1_Roman.29771.29771.3  | 3 | 10.64 | 70.9 | 9.74E+05 (R) |
| 229 | S1_Roman.43754.43858.3  | 3 | 13.32 | 81.7 | 1.23E+06 (K) |
| 299 | L3_Roman.44516.44621.3  | 3 | 12.5  | 79.2 | 2.82E+06 (K) |
| 325 | X4R_Roman.44089.44089.3 | 3 | 12.31 | 81.5 | 1.82E+06 (K) |
| 520 | X3L_Roman.43754.43754.3 | 3 | 11.16 | 75.4 | 1.17E+06 (K) |
| 686 | X3R_Roman.42291.42418.3 | 3 | 10.39 | 74.3 | 1.10E+06 (K) |
| 728 | S2_Roman.43272.43380.3  | 3 | 10.22 | 86.6 | 3.12E+06 (K) |
| 326 | X4R_Roman.43976.43976.3 | 3 | 12.3  | 78   | 1.82E+06 (K) |
| 465 | L3_Roman.44420.44420.3  | 3 | 11.37 | 84.6 | 2.82E+06 (K) |

|                             |   |       |      |              |
|-----------------------------|---|-------|------|--------------|
| 770 X2R_Roman.30902.30902.  | 3 | 10.14 | 83.4 | 4.40E+07 (K) |
| 374 X3L_Roman.19527.19783.: | 3 | 11.98 | 81.9 | 3.92E+06 (-) |
| 119 S5_Roman.5199.5329.2    | 2 | 15.16 | 90.4 | 6.03E+07 (K) |
| 124 X4L_Roman.5086.5086.2   | 2 | 15.07 | 89.3 | 5.70E+07 (K) |
| 132 X4R_Roman.5469.5594.2   | 2 | 14.86 | 90.7 | 4.54E+07 (K) |
| 147 S3_Roman.5274.5408.2    | 2 | 14.53 | 78   | 9.17E+07 (K) |
| 207 X2L_Roman.5001.5001.2   | 2 | 13.51 | 87.1 | 1.42E+06 (K) |
| 219 S1_Roman.5351.5415.2    | 2 | 13.41 | 80.7 | 1.68E+08 (K) |
| 242 X3L_Roman.5499.5499.2   | 2 | 13.11 | 73.8 | 1.68E+07 (K) |
| 285 L1_Roman.4928.4928.2    | 2 | 12.67 | 88.7 | 3.82E+06 (K) |
| 303 X1L_Roman.5032.5032.2   | 2 | 12.48 | 85.3 | 5.87E+05 (K) |
| 343 L4_Roman.5042.5042.2    | 2 | 12.21 | 92.7 | 1.78E+06 (K) |
| 396 X5R_Roman.4865.4865.2   | 2 | 11.84 | 83   | 6.88E+05 (K) |





|                      |     |          |           |           |                        |
|----------------------|-----|----------|-----------|-----------|------------------------|
| AYHDMR               | (E) | 792.346  | F7BBH8    | F7BBH8 F6 | Serum amyloid A prote  |
| AYHDMR               | (E) | 792.346  | F7BBH8    | F7BBH8 F6 | Serum amyloid A prote  |
| AYNDMR               | (E) | 769.33   | P19857    | P19857 AC | Serum amyloid A prote  |
| AYNDMR               | (E) | 769.33   | P19857    | P19857 AC | Serum amyloid A prote  |
| AYNDMR               | (E) | 769.33   | P19857    | P19857 AC | Serum amyloid A prote  |
| AYNDMR               | (E) | 769.33   | P19857    | P19857 AC | Serum amyloid A prote  |
| AYNDMR               | (E) | 769.33   | P19857    | P19857 AC | Serum amyloid A prote  |
| AYNDMR               | (E) | 769.33   | P19857    | P19857 AC | Serum amyloid A prote  |
| AYNDMR               | (E) | 769.33   | P19857    | P19857 AC | Serum amyloid A prote  |
| AYNDMR               | (E) | 769.33   | P19857    | P19857 AC | Serum amyloid A prote  |
| AYNDMR               | (E) | 769.33   | P19857    | P19857 AC | Serum amyloid A prote  |
| AYNDMR               | (E) | 769.33   | P19857    | P19857 AC | Serum amyloid A prote  |
| AYNDMR               | (E) | 769.33   | P19857    | P19857 AC | Serum amyloid A prote  |
| CASFR                | (L) | 606.303  | A0A224Z8C | A0A224Z8C | Serum amyloid A prote  |
| CASFR                | (L) | 606.303  | A0A224Z8C | A0A224Z8C | Serum amyloid A prote  |
| CASFR                | (L) | 606.303  | A0A224Z8C | A0A224Z8C | Serum amyloid A prote  |
| CASFR                | (L) | 606.303  | A0A224Z8C | A0A224Z8C | Serum amyloid A prote  |
| CPGGVWAAKVISDAREDLQR | (L) | 2125.115 | P53614    | P53614    | Serum amyloid A-1 pro  |
| CPGGVWAAKVISDAREDLQR | (L) | 2125.115 | P53614    | P53614    | Serum amyloid A-1 pro  |
| CPGGVWAAKVISDAREDLQR | (L) | 2125.115 | P53614    | P53614    | Serum amyloid A-1 pro  |
| CPGGVWAAKVISDAREDLQR | (L) | 2125.115 | P53614    | P53614    | Serum amyloid A-1 pro  |
| CPGGVWAAKVISDAREDLQR | (L) | 2125.115 | P53614    | P53614    | Serum amyloid A-1 pro  |
| CPGGVWAAKVISDAREDLQR | (L) | 2125.115 | P53614    | P53614    | Serum amyloid A-1 pro  |
| CPGGVWAAKVISDAREDLQR | (L) | 2125.115 | P53614    | P53614    | Serum amyloid A-1 pro  |
| CPGGVWAAKVISDAREDLQR | (L) | 2125.115 | P53614    | P53614    | Serum amyloid A-1 pro  |
| DIPSLK               | (A) | 706.377  | A0A4X2KG  | A0A4X2KG  | Serum amyloid A like 1 |
| DIPSLK               | (A) | 706.377  | A0A4X2KG  | A0A4X2KG  | Serum amyloid A like 1 |
| DLPSLK               | (A) | 706.377  | G3WV59    | G3WV59    | Serum amyloid A like 1 |
| DLPSLK               | (A) | 706.377  | A0A4X2KG  | A0A4X2KG  | Serum amyloid A like 1 |
| DLSLR                | (E) | 630.357  | A0A147BE  | A0A147BE  | Putative serum amyloi  |
| DLSLR                | (E) | 630.357  | A0A147BE  | A0A147BE  | Putative serum amyloi  |
| DPNFFRPPDLPSKY       | (-) | 1634.833 | A0A5F8HF  | A0A5F8HF  | Serum amyloid A prote  |
| DPNHFR               | (S) | 786.353  | A0A2K5QF  | A0A2K5QF  | Serum amyloid A prote  |
| DPNHFR               | (S) | 786.353  | A0A2K5QF  | A0A2K5QF  | Serum amyloid A prote  |
| DPNHFR               | (S) | 786.353  | A0A2K5QF  | A0A2K5QF  | Serum amyloid A prote  |
| DPNHFR               | (S) | 786.353  | A0A2K5QF  | A0A2K5QF  | Serum amyloid A prote  |
| DPNHFR               | (S) | 786.353  | A0A2K5QF  | A0A2K5QF  | Serum amyloid A prote  |
| DPNHFRPAGLDPKY       | (-) | 1626.802 | A0A4X2KB  | A0A4X2KB  | Serum amyloid A prote  |
| DPNHFRPAGLDPKY       | (-) | 1626.802 | A0A4X2KB  | A0A4X2KB  | Serum amyloid A prote  |
| DPNHFRPAGLDPKY       | (-) | 1626.802 | A0A4X2KB  | A0A4X2KB  | Serum amyloid A prote  |
| DPNHFRPAGLDPKY       | (-) | 1626.802 | A0A023VM  | A0A023VM  | Serum amyloid A prote  |
| DPNHFRPAGLDPKY       | (-) | 1626.802 | A0A023VM  | A0A023VM  | Serum amyloid A prote  |
| DPNHFRPAGLDPKY       | (-) | 1626.802 | A0A023VM  | A0A023VM  | Serum amyloid A prote  |
| DPNHFRPAGLDPKY       | (-) | 1626.802 | P19708    | P19708 P3 | Serum amyloid A prote  |
| DPNHFRPAGLDPKY       | (-) | 1626.802 | A0A023VM  | A0A023VM  | Serum amyloid A prote  |
| DPNHFRPAGLDPKY       | (-) | 1626.802 | P19708    | P19708 P3 | Serum amyloid A prote  |
| DPNHFRPAGLDPKY       | (-) | 1626.802 | A0A023VM  | A0A023VM  | Serum amyloid A prote  |





|                               |     |          |           |           |                       |
|-------------------------------|-----|----------|-----------|-----------|-----------------------|
| EANYIGADK                     | (Y) | 980.468  | P19707    | P19707 P1 | Serum amyloid A prote |
| EANYIGADK                     | (Y) | 980.468  | P19707    | P19707 P1 | Serum amyloid A prote |
| EANYIGADKYFHAR                | (G) | 1654.797 | P19707    | P19707 P1 | Serum amyloid A prote |
| EANYIGADKYFHAR                | (G) | 1654.797 | P19707    | P19707 P1 | Serum amyloid A prote |
| EANYIGADKYFHAR                | (G) | 1654.797 | P19707    | P19707 P1 | Serum amyloid A prote |
| EANYINADKYFHAR                | (G) | 1711.819 | P53614    | P53614 F7 | Serum amyloid A-1 pro |
| EANYINADKYFHAR                | (G) | 1711.819 | P53614    | P53614 F7 | Serum amyloid A-1 pro |
| EDFQR                         | (F) | 660.331  | A0A1A6G0  | A0A1A6G0  | Serum amyloid A prote |
| EDIQkFLGHAEDtLADQAANEWGRS (D) | (D) | 3043.45  | A0A2K5HM  | A0A2K5HM  | Serum amyloid A prote |
| EDIQkFLGHAEDtLADQAANEWGRS (D) | (D) | 3043.45  | A0A2K5HM  | A0A2K5HM  | Serum amyloid A prote |
| EDIQkFLGHAEDtLADQAANEWGRS (D) | (D) | 3043.45  | A0A2K5HM  | A0A2K5HM  | Serum amyloid A prote |
| EDIQkFLGHAEDTLADQAANEWGRS (D) | (D) | 3043.45  | A0A2K5HM  | A0A2K5HM  | Serum amyloid A prote |
| EGASLIR                       | (V) | 731.405  | A0A671FZ7 | A0A671FZ7 | Serum amyloid A prote |
| EGASLIR                       | (V) | 731.405  | A0A671FZ7 | A0A671FZ7 | Serum amyloid A prote |
| EGASLIR                       | (V) | 731.405  | A0A671FZ7 | A0A671FZ7 | Serum amyloid A prote |
| EGASLIR                       | (V) | 731.405  | A0A671FZ7 | A0A671FZ7 | Serum amyloid A prote |
| EGNDPNLFRPAGLPEK              | (Y) | 1777.862 | A0A4W6DC  | A0A4W6DC  | Serum amyloid A prote |
| EITDPYIK                      | (G) | 1009.52  | A0A315BD  | A0A315BD  | Serum amyloid a prote |
| EITDPYIK                      | (G) | 1009.52  | A0A315BD  | A0A315BD  | Serum amyloid a prote |
| EITDPYIK                      | (G) | 1009.52  | A0A315BD  | A0A315BD  | Serum amyloid a prote |
| EITDPYIK                      | (G) | 1009.52  | A0A315BD  | A0A315BD  | Serum amyloid a prote |
| EITDPYIK                      | (G) | 1009.52  | A0A315BD  | A0A315BD  | Serum amyloid a prote |
| EITDPYIK                      | (G) | 1009.52  | A0A315BD  | A0A315BD  | Serum amyloid a prote |
| ENFQR                         | (L) | 693.332  | A0A1S3GU  | A0A1S3GU  | Serum amyloid A prote |
| ENFQR                         | (L) | 693.332  | A0A1S3GU  | A0A1S3GU  | Serum amyloid A prote |
| FGDSGHGAADSR                  | (A) | 1176.503 | F6ZL17    | F6ZL17 A0 | Serum amyloid A prote |
| FGDSGHGAADSR                  | (A) | 1176.503 | F6ZL17    | F6ZL17 A0 | Serum amyloid A prote |
| FGDSGHGAADSR                  | (A) | 1176.503 | F6ZL17    | F6ZL17 A0 | Serum amyloid A prote |
| FGDSGHGAADSR                  | (A) | 1176.503 | F6ZL17    | F6ZL17 A0 | Serum amyloid A prote |
| FGDSGHGAADSR                  | (A) | 1176.503 | F6ZL17    | F6ZL17 A0 | Serum amyloid A prote |
| FGDSGHGAADSR                  | (A) | 1176.503 | F6ZL17    | F6ZL17 A0 | Serum amyloid A prote |
| FGDSGHGAADSR                  | (A) | 1176.503 | F6ZL17    | F6ZL17 A0 | Serum amyloid A prote |
| FGDSGHGAADSR                  | (A) | 1176.503 | F6ZL17    | F6ZL17 A0 | Serum amyloid A prote |
| FGDSGHGAADSR                  | (A) | 1176.503 | F6ZL17    | F6ZL17 A0 | Serum amyloid A prote |
| FGDSGHGAADSR                  | (A) | 1176.503 | F6ZL17    | F6ZL17 A0 | Serum amyloid A prote |
| FGDSGHGAADSR                  | (A) | 1176.503 | F6ZL17    | F6ZL17 A0 | Serum amyloid A prote |
| FGDSGHGAADSR                  | (A) | 1176.503 | F6ZL17    | F6ZL17 A0 | Serum amyloid A prote |
| FGDSGHGAADSR                  | (A) | 1176.503 | F6ZL17    | F6ZL17 A0 | Serum amyloid A prote |
| FGDSGHGAEDSR                  | (A) | 1234.508 | F6ZPQ6    | F6ZPQ6    | Serum amyloid A prote |
| FGDSGHGAEDSR                  | (A) | 1234.508 | F6ZPQ6    | F6ZPQ6    | Serum amyloid A prote |
| FGDSGHGAEDSR                  | (A) | 1234.508 | F6ZPQ6    | F6ZPQ6    | Serum amyloid A prote |
| FGDSGHGAEDSR                  | (A) | 1234.508 | F6ZPQ6    | F6ZPQ6    | Serum amyloid A prote |
| FGDSGHGAEDSR                  | (A) | 1234.508 | F6ZPQ6    | F6ZPQ6    | Serum amyloid A prote |
| FGDSGHGAEDSR                  | (A) | 1234.508 | F6ZPQ6    | F6ZPQ6    | Serum amyloid A prote |
| FGDSGHGAEDSR                  | (A) | 1234.508 | F6ZPQ6    | F6ZPQ6    | Serum amyloid A prote |
| FGDSGHGAEDSR                  | (A) | 1234.508 | F6ZPQ6    | F6ZPQ6 AC | Serum amyloid A prote |
| FGDSGHGAEDSR                  | (A) | 1234.508 | F6ZPQ6    | F6ZPQ6 AC | Serum amyloid A prote |



|                        |     |          |           |           |                        |
|------------------------|-----|----------|-----------|-----------|------------------------|
| FGDSGHGAEDSR           | (A) | 1234.508 | F6ZPQ6    | F6ZPQ6 AC | Serum amyloid A prote  |
| FGDSGHGAEDSR           | (A) | 1234.508 | F6ZPQ6    | F6ZPQ6 AC | Serum amyloid A prote  |
| FGDSGHGAEDSR           | (A) | 1234.508 | F6ZPQ6    | F6ZPQ6    | Serum amyloid A prote  |
| FGDSGHGAEDSR           | (A) | 1234.508 | F6ZPQ6    | F6ZPQ6 AC | Serum amyloid A prote  |
| FGDSGHGAEDSR           | (A) | 1234.508 | F6ZPQ6    | F6ZPQ6    | Serum amyloid A prote  |
| FGDSGHGAEDSR           | (A) | 1234.508 | F6ZPQ6    | F6ZPQ6 AC | Serum amyloid A prote  |
| FGDSGHGAEDSR           | (A) | 1234.508 | F6ZPQ6    | F6ZPQ6    | Serum amyloid A prote  |
| FGDSGHGAEDSR           | (A) | 1234.508 | F6ZPQ6    | F6ZPQ6 AC | Serum amyloid A prote  |
| FGDSGHGAEDSR           | (A) | 1234.508 | F6ZPQ6    | F6ZPQ6 AC | Serum amyloid A prote  |
| FGDSGHGAEDSR           | (A) | 1234.508 | F6ZPQ6    | F6ZPQ6    | Serum amyloid A prote  |
| FGDSGHGAEDSR           | (A) | 1234.508 | F6ZPQ6    | F6ZPQ6 AC | Serum amyloid A prote  |
| FGDSGHGAEDSR           | (A) | 1234.508 | F6ZPQ6    | F6ZPQ6    | Serum amyloid A prote  |
| FGDSGHGAEDSR           | (A) | 1234.508 | F6ZPQ6    | F6ZPQ6    | Serum amyloid A prote  |
| FGDSGHGAEDSR           | (A) | 1234.508 | F6ZPQ6    | F6ZPQ6    | Serum amyloid A prote  |
| FGDSGHGAEDSR           | (A) | 1234.508 | F6ZPQ6    | F6ZPQ6    | Serum amyloid A prote  |
| FGDSGHGEADSR           | (A) | 1234.508 | A0A5F5PVI | A0A5F5PVI | Serum amyloid A prote  |
| FGDSGHGEADSR           | (A) | 1234.508 | A0A5F5PVI | A0A5F5PVI | Serum amyloid A prote  |
| FGDSGHGEADSR           | (A) | 1234.508 | A0A5F5PVI | A0A5F5PVI | Serum amyloid A prote  |
| FGDSGHGEADSR           | (A) | 1234.508 | A0A5F5PVI | A0A5F5PVI | Serum amyloid A prote  |
| FGDSGHGEADSR           | (A) | 1234.508 | A0A5F5PVI | A0A5F5PVI | Serum amyloid A prote  |
| FGDSGHGEADSR           | (A) | 1234.508 | A0A3Q2HV  | A0A3Q2HV  | Serum amyloid A prote  |
| FGDSGHGEADSR           | (A) | 1234.508 | A0A3Q2HV  | A0A3Q2HV  | Serum amyloid A prote  |
| FGDSGHGVEDSK           | (A) | 1234.534 | J9NVE9    | J9NVE9 A0 | Serum amyloid A prote  |
| FNFGGSGR               | (G) | 814.384  | A0A5F5PJJ | A0A5F5PJJ | Serum amyloid A prote  |
| FPALR                  | (L) | 619.356  | A0A452GU  | A0A452GU  | Serum amyloid A like 1 |
| FPALR                  | (L) | 619.356  | A0A452GU  | A0A452GU  | Serum amyloid A like 1 |
| FSFGGSGR               | (G) | 814.384  | P19857    | P19857 AC | Serum amyloid A prote  |
| FSFGGSGR               | (G) | 814.384  | P19857    | P19857 AC | Serum amyloid A prote  |
| FSFGGSGR               | (G) | 814.384  | P19857    | P19857 AC | Serum amyloid A prote  |
| FSFGGSGR               | (G) | 814.384  | P19857    | P19857 AC | Serum amyloid A prote  |
| FSFGGSGR               | (G) | 814.384  | P19857    | P19857 AC | Serum amyloid A prote  |
| FSFGGSGR               | (G) | 814.384  | P19857    | P19857 AC | Serum amyloid A prote  |
| FSFGGSGR               | (G) | 814.384  | P19857    | P19857 AC | Serum amyloid A prote  |
| FSFGGSGR               | (G) | 814.384  | P19857    | P19857 AC | Serum amyloid A prote  |
| FSFGGSGR               | (G) | 814.384  | P19857    | P19857 AC | Serum amyloid A prote  |
| FSFGGSGR               | (G) | 814.384  | P19857    | P19857 AC | Serum amyloid A prote  |
| FSFGGSGR               | (G) | 814.384  | P19857    | P19857 AC | Serum amyloid A prote  |
| FSFGGSGR               | (G) | 814.384  | P19857    | P19857 AC | Serum amyloid A prote  |
| FSFGGSGR               | (G) | 814.384  | P19857    | P19857 AC | Serum amyloid A prote  |
| FTGFFRPGSSGHGAEDSK     | (A) | 1941.873 | A0A667IN1 | A0A667IN1 | Serum amyloid A prote  |
| FTGRGIEDSR             | (A) | 1103.58  | P20726    | P20726 Q5 | Serum amyloid A-1 pro  |
| FTGRGIEDSR             | (A) | 1103.58  | P20726    | P20726 Q5 | Serum amyloid A-1 pro  |
| FVYCIWR                | (R) | 944.466  | A0A131YNi | A0A131YNi | Serum amyloid A prote  |
| GAGGRVAAAVISnTWEGIQRAR | (G) | 2240.201 | A0A5C6NP  | A0A5C6NP  | Serum amyloid A prote  |
| GFPSK                  | (Y) | 501.303  | A0A091GCI | A0A091GCI | Serum amyloid A prote  |
| GGAWAAK                | (V) | 660.346  | Q7M3A4    | Q7M3A4    | Serum amyloid A prote  |
| GLLWGRNPEGGTTAFR       | (V) | 1755.867 | Q64423    | Q64423    | Serum amyloid A prote  |
| GLLWGRNPEGGTTAFR       | (V) | 1755.867 | Q64423    | Q64423    | Serum amyloid A prote  |



|                           |     |          |           |           |                        |
|---------------------------|-----|----------|-----------|-----------|------------------------|
| GPGGKWAAKVISDGR           | (E) | 1498.813 | A0A553RF\ | A0A553RF\ | Serum amyloid A prote  |
| GPGGKWAAKVISDGR           | (E) | 1498.813 | A0A553RF\ | A0A553RF\ | Serum amyloid A prote  |
| GPGGKWAAKVISDGR           | (E) | 1498.813 | A0A553RF\ | A0A553RF\ | Serum amyloid A prote  |
| GPGGKWAAKVISDGR           | (E) | 1498.813 | A0A553RF\ | A0A553RF\ | Serum amyloid A prote  |
| GPGGKWAAKVISDGR           | (E) | 1498.813 | A0A553QR  | A0A553QR  | Serum amyloid A prote  |
| GPGGKWAAKVISDGR           | (E) | 1498.813 | A0A553RF\ | A0A553RF\ | Serum amyloid A prote  |
| GPGGKWAAKVISDGR           | (E) | 1498.813 | A0A553QR  | A0A553QR  | Serum amyloid A prote  |
| GPGGKWAAKVISDGR           | (E) | 1498.813 | A0A553RF\ | A0A553RF\ | Serum amyloid A prote  |
| GPGGKWAAKVISDGR           | (E) | 1498.813 | A0A553RF\ | A0A553RF\ | Serum amyloid A prote  |
| GPGGTRAAK                 | (V) | 826.489  | F7ANU9    | F7ANU9    | Serum amyloid A prote  |
| GPGGTRAAK                 | (V) | 826.489  | F7ANU9    | F7ANU9    | Serum amyloid A prote  |
| GPGGVWAAEVLSDARENFQRVTDFK | (F) | 2836.401 | L5L5Z0    | L5L5Z0    | Serum amyloid A prote  |
| GPGWAWAAKVISDAREDIQR      | (F) | 2097.084 | A0A1A6G0  | A0A1A6G0  | Serum amyloid A prote  |
| GTWDMIR                   | (A) | 878.419  | P19857    | P19857 F6 | Serum amyloid A prote  |
| GTWDMIR                   | (A) | 878.419  | P19857    | P19857 F6 | Serum amyloid A prote  |
| GTWDMIR                   | (A) | 878.419  | P19857    | P19857 F6 | Serum amyloid A prote  |
| GTWDMIR                   | (A) | 878.419  | P19857    | P19857 F6 | Serum amyloid A prote  |
| GTWDMIR                   | (A) | 878.419  | P19857    | P19857 F6 | Serum amyloid A prote  |
| GTWDMIR                   | (A) | 878.419  | P19857    | P19857 F6 | Serum amyloid A prote  |
| GTWDMIR                   | (A) | 878.419  | P19857    | P19857 F6 | Serum amyloid A prote  |
| GTWDMIR                   | (A) | 878.419  | P19857    | P19857 F6 | Serum amyloid A prote  |
| GTWDMIR                   | (A) | 878.419  | P19857    | P19857 F6 | Serum amyloid A prote  |
| GTWDMIR                   | (A) | 878.419  | P19857    | P19857 F6 | Serum amyloid A prote  |
| GTWDMIR                   | (A) | 878.419  | P19857    | P19857 F6 | Serum amyloid A prote  |
| GTWDMIR                   | (A) | 878.419  | P19857    | P19857 F6 | Serum amyloid A prote  |
| GTWDMIR                   | (A) | 878.419  | P19857    | P19857 F6 | Serum amyloid A prote  |
| GTWDMIR                   | (A) | 878.419  | P19857    | P19857 F6 | Serum amyloid A prote  |
| GTWDMIR                   | (A) | 878.419  | P19857    | P19857 F6 | Serum amyloid A prote  |
| GTWDMIR                   | (A) | 878.419  | P19857    | P19857 F6 | Serum amyloid A prote  |
| GTWDMIR                   | (A) | 878.419  | P19857    | P19857 F6 | Serum amyloid A prote  |
| GTWDMIR                   | (A) | 878.419  | P19857    | P19857 F6 | Serum amyloid A prote  |
| GTWDMIR                   | (A) | 878.419  | P19857    | P19857 F6 | Serum amyloid A prote  |
| GTWDMIR                   | (A) | 878.419  | P19857    | P19857 F6 | Serum amyloid A prote  |
| GTWDMIR                   | (A) | 878.419  | P19857    | P19857 F6 | Serum amyloid A prote  |
| GTWDMIR                   | (A) | 878.419  | P19857    | P19857 F6 | Serum amyloid A prote  |
| GTWDMIR                   | (A) | 878.419  | P19857    | P19857 F6 | Serum amyloid A prote  |
| GTWDMIR                   | (A) | 878.419  | P19857    | P19857 F6 | Serum amyloid A prote  |
| GTWDMIR                   | (A) | 878.419  | P19857    | P19857 F6 | Serum amyloid A prote  |
| GTWDMIR                   | (A) | 878.419  | P19857    | P19857 F6 | Serum amyloid A prote  |
| IAKTGKFEGSK               | (K) | 1166.616 | A0A0F2IUK | A0A0F2IUK | Serum amyloid A prote  |
| IDEKIVNAGK                | (F) | 1070.657 | A0A6I9HRC | A0A6I9HRC | Serum amyloid A prote  |
| IEAIEK                    | (F) | 690.367  | A0A1T4VW  | A0A1T4VW  | Serum amyloid A prote  |
| IEAIEK                    | (F) | 690.367  | A0A1T4VW  | A0A1T4VW  | Serum amyloid A prote  |
| IEAIEK                    | (F) | 690.367  | A0A1T4VW  | A0A1T4VW  | Serum amyloid A prote  |
| IEAIEK                    | (F) | 690.367  | A0A1T4VW  | A0A1T4VW  | Serum amyloid A prote  |
| IEAIEK                    | (F) | 690.367  | A0A1T4VW  | A0A1T4VW  | Serum amyloid A prote  |
| IEAIEK                    | (F) | 690.367  | A0A1T4VW  | A0A1T4VW  | Serum amyloid A prote  |
| IEAIEK                    | (F) | 690.367  | A0A1T4VW  | A0A1T4VW  | Serum amyloid A prote  |
| IEKEK                     | (Y) | 574.356  | A0A2I3SXC | A0A2I3SXC | Serum amyloid A like 1 |
| IEKEK                     | (Y) | 574.356  | A0A2I3SXC | A0A2I3SXC | Serum amyloid A like 1 |
| IEKLLR                    | (L) | 745.457  | A0A6I8NN\ | A0A6I8NN\ | Serum amyloid A like 1 |

|                       |     |          |           |           |                        |
|-----------------------|-----|----------|-----------|-----------|------------------------|
| IEKLLR                | (L) | 745.457  | A0A6I8NN\ | A0A6I8NN\ | Serum amyloid A like 1 |
| IELER                 | (Q) | 658.425  | A0A120D7. | A0A120D7. | Putative serum amyloi  |
| IELTR                 | (Q) | 658.425  | A0A120D7. | A0A120D7. | Putative serum amyloi  |
| IEQDVHHR              | (C) | 991.47   | W5PJR0    | W5PJR0    | Serum amyloid A prote  |
| IEQDVHHR              | (C) | 991.47   | W5PJR0    | W5PJR0    | Serum amyloid A prote  |
| IEQDVHHR              | (C) | 991.47   | W5PJR0    | W5PJR0    | Serum amyloid A prote  |
| IEQDVHHR              | (C) | 991.47   | W5PJR0    | W5PJR0    | Serum amyloid A prote  |
| IEQDVHHR              | (C) | 991.47   | W5PJR0    | W5PJR0    | Serum amyloid A prote  |
| IGNARENLRVTDFFK       | (Y) | 1938.019 | A0A2U3X1\ | A0A2U3X1\ | Serum amyloid A prote  |
| IGPGGAWAAEVISDARENIQR | (F) | 2253.148 | D3DQX7    | D3DQX7    | Serum amyloid A prote  |
| IGQGGHHR              | (C) | 933.465  | A0A6P7D9. | A0A6P7D9. | Serum amyloid A prote  |
| IGQVVDK               | (L) | 759.425  | A0A667HZI | A0A667HZI | Serum amyloid A like 1 |
| IGWVR                 | (S) | 648.329  | A0A1D5QY  | A0A1D5QY  | Serum amyloid A like 1 |
| IGWVR                 | (S) | 648.329  | A0A1D5QY  | A0A1D5QY  | Serum amyloid A like 1 |
| IGWVR                 | (S) | 648.329  | A0A1D5QY  | A0A1D5QY  | Serum amyloid A like 1 |
| IGWVR                 | (S) | 648.329  | A0A1D5QY  | A0A1D5QY  | Serum amyloid A like 1 |
| IGWVR                 | (S) | 648.329  | A0A1D5QY  | A0A1D5QY  | Serum amyloid A like 1 |
| IISRVK                | (L) | 747.455  | L9LAH9    | L9LAH9    | Serum amyloid A-3 pro  |
| ILLPMYR               | (S) | 906.487  | A0A4X2KG. | A0A4X2KG. | Serum amyloid A like 1 |
| ILLPMYR               | (S) | 906.487  | A0A4X2KG. | A0A4X2KG. | Serum amyloid A like 1 |
| ILYEVGK               | (T) | 879.482  | G1PAL8    | G1PAL8    | Serum amyloid A like 1 |
| ILYEVGK               | (T) | 879.482  | G1PAL8    | G1PAL8    | Serum amyloid A like 1 |
| ITCTSR                | (K) | 664.362  | A0A1A6G0  | A0A1A6G0  | Serum amyloid A prote  |
| ITDLIKYGDSGHGVEDsK    | (A) | 1933.95  | P18575    | P18575    | Serum amyloid A-1 pro  |
| ITDSLLK               | (G) | 799.492  | A0A6P3EFE | A0A6P3EFE | Serum amyloid A prote  |
| ITDSLLK               | (G) | 799.492  | A0A6P3EFE | A0A6P3EFE | Serum amyloid A prote  |
| IVFCVLEAAK            | (Q) | 1089.597 | A0A5F9DK\ | A0A5F9DK\ | Serum amyloid A like 1 |
| IVFCVLEAAK            | (Q) | 1089.597 | G1SHI3    | G1SHI3    | Serum amyloid A like 1 |
| IVFCVLEAAK            | (Q) | 1089.597 | A0A5F9DK\ | A0A5F9DK\ | Serum amyloid A like 1 |
| IVFCVLEAAK            | (Q) | 1089.597 | A0A5F9DK\ | A0A5F9DK\ | Serum amyloid A like 1 |
| IVFCVLEAAK            | (Q) | 1089.597 | A0A5F9DK\ | A0A5F9DK\ | Serum amyloid A like 1 |
| IVFCVLEAAK            | (Q) | 1089.597 | A0A5F9DK\ | A0A5F9DK\ | Serum amyloid A like 1 |
| IVFCVLEAAK            | (Q) | 1089.597 | A0A5F9DK\ | A0A5F9DK\ | Serum amyloid A like 1 |
| IVFCVLEAAK            | (Q) | 1089.597 | A0A5F9DK\ | A0A5F9DK\ | Serum amyloid A like 1 |
| IVFCVLEAAK            | (Q) | 1089.597 | A0A5F9DK\ | A0A5F9DK\ | Serum amyloid A like 1 |
| IVFCVLEAAK            | (Q) | 1089.597 | A0A5F9DK\ | A0A5F9DK\ | Serum amyloid A like 1 |
| IVFCVLEAAK            | (Q) | 1089.597 | A0A5F9DK\ | A0A5F9DK\ | Serum amyloid A like 1 |
| KGGALEAVK             | (T) | 896.495  | A0A120D7. | A0A120D7. | Putative serum amyloi  |
| KGGALEAVK             | (T) | 896.495  | A0A120D7. | A0A120D7. | Putative serum amyloi  |
| KGGALEAVK             | (T) | 896.495  | A0A120D7. | A0A120D7. | Putative serum amyloi  |
| KGGALEAVK             | (T) | 896.495  | A0A120D7. | A0A120D7. | Putative serum amyloi  |
| KGGALEAVK             | (T) | 896.495  | A0A120D7. | A0A120D7. | Putative serum amyloi  |
| KGGALEAVK             | (T) | 896.495  | A0A120D7. | A0A120D7. | Putative serum amyloi  |
| KGGALEAVK             | (T) | 896.495  | A0A120D7. | A0A120D7. | Putative serum amyloi  |
| KGGALEAVK             | (T) | 896.495  | A0A120D7. | A0A120D7. | Putative serum amyloi  |
| LAAEVISNAI            | (E) | 1043.584 | A0A6G1P8\ | A0A6G1P8\ | Serum amyloid A prote  |
| LAAEVISNAI            | (E) | 1043.584 | A0A6G1P8\ | A0A6G1P8\ | Serum amyloid A prote  |
| LAAGVISDVR            | (E) | 1073.574 | A0A087T1\ | A0A087T1\ | Serum amyloid A prote  |
| LAAGVISDVR            | (E) | 1073.574 | A0A087T1\ | A0A087T1\ | Serum amyloid A prote  |
| LAKDWGRR              | (G) | 987.512  | A0A2K6EY\ | A0A2K6EY\ | Serum amyloid A prote  |

|                    |     |          |           |           |                          |
|--------------------|-----|----------|-----------|-----------|--------------------------|
| LDQEANRWGRR        | (G) | 1400.714 | A0A6I9HRC | A0A6I9HRC | Serum amyloid A prote    |
| LDQEANRWGRR        | (G) | 1400.714 | A0A6I9HRC | A0A6I9HRC | Serum amyloid A prote    |
| LDVASCLLDAAK       | (Q) | 1289.677 | A0A2U9BV  | A0A2U9BV  | Serum amyloid A-like p   |
| LDVASCLLDAAK       | (Q) | 1289.677 | A0A2U9BV  | A0A2U9BV  | Serum amyloid A-like p   |
| LDVASCLLDAAK       | (Q) | 1289.677 | A0A2U9BY  | A0A2U9BY  | Serum amyloid A-like p   |
| LDVASCLLDAAK       | (Q) | 1289.677 | A0A2U9BV  | A0A2U9BV  | Serum amyloid A-like p   |
| LDVASCLLDAAK       | (Q) | 1289.677 | A0A2U9BV  | A0A2U9BV  | Serum amyloid A-like p   |
| LDVASCLLDAAK       | (Q) | 1289.677 | A0A2U9BV  | A0A2U9BV  | Serum amyloid A-like p   |
| LDVASCLLDAAK       | (Q) | 1289.677 | A0A2U9BV  | A0A2U9BV  | Serum amyloid A-like p   |
| LDVASCLLDAAK       | (Q) | 1289.677 | A0A2U9BV  | A0A2U9BV  | Serum amyloid A-like p   |
| LDVASCLLDAAK       | (Q) | 1289.677 | A0A2U9BV  | A0A2U9BV  | Serum amyloid A-like p   |
| LDVASCLLDAAK       | (Q) | 1289.677 | A0A2U9BV  | A0A2U9BV  | Serum amyloid A-like p   |
| LDVASCLLDAAK       | (Q) | 1289.677 | A0A2U9BV  | A0A2U9BV  | Serum amyloid A-like p   |
| LDVASCLLDAAK       | (Q) | 1289.677 | A0A2U9BV  | A0A2U9BV  | Serum amyloid A-like p   |
| LDVASCLVEAAK       | (Q) | 1289.677 | A0A2U9BV  | A0A2U9BV  | Serum amyloid A-like p   |
| LDVASCLVEAAK       | (Q) | 1289.677 | A0A2U9BV  | A0A2U9BV  | Serum amyloid A-like p   |
| LDVASCLVEAAK       | (Q) | 1289.677 | A0A2U9BV  | A0A2U9BV  | Serum amyloid A-like p   |
| LEKEK              | (Y) | 588.371  | A0A315BD  | A0A315BD  | Serum amyloid a prote    |
| LFALDEK            | (L) | 879.446  | A0A0D9QY  | A0A0D9QY  | Serum amyloid A like 1   |
| LFDLAEK            | (L) | 879.446  | A0A0G2JUI | A0A0G2JUI | Similar to Serum amylc   |
| LFDLAEK            | (L) | 879.446  | A0A0D9QY  | A0A0D9QY  | Serum amyloid A like 1   |
| LFDLAEK            | (L) | 879.446  | A0A0G2JUI | A0A0G2JUI | Similar to Serum amylc   |
| LFDNAKK            | (S) | 809.415  | A0A452GU  | A0A452GU  | Serum amyloid A like 1   |
| LFDNAKK            | (S) | 809.415  | A0A452GU  | A0A452GU  | Serum amyloid A like 1   |
| LFDNAKK            | (S) | 809.415  | A0A452GU  | A0A452GU  | Serum amyloid A like 1   |
| LFDNAKK            | (S) | 809.415  | A0A452GU  | A0A452GU  | Serum amyloid A like 1   |
| LFDNAKK            | (S) | 809.415  | A0A452GU  | A0A452GU  | Serum amyloid A like 1   |
| LFNLR              | (E) | 602.362  | A0A671FZ7 | A0A671FZ7 | Serum amyloid A prote    |
| LFVLDEK            | (L) | 879.446  | A0A1D5QY  | A0A1D5QY  | Serum amyloid A like 1   |
| LFVLDEK            | (L) | 879.446  | A0A0D9QY  | A0A0D9QY  | Serum amyloid A like 1   |
| LGETAWSPSYK        | (T) | 1180.6   | A0A0C9SC1 | A0A0C9SC1 | Putative serum amyloi    |
| LGKNPNHFRPQGLPEK   | (F) | 1805.94  | A0A6I9M4I | A0A6I9M4I | Serum amyloid A prote    |
| LGNDPEHFRPAGLPNKY  | (-) | 1898.914 | F7ANU9    | F7ANU9    | Serum amyloid A prote    |
| LGWVR              | (S) | 648.329  | A0A1D5QY  | A0A1D5QY  | Serum amyloid A like 1   |
| LIALISPEK          | (S) | 1041.619 | A0A669R1/ | A0A669R1/ | Serum amyloid A like 1   |
| LIALISPEK          | (S) | 1041.619 | A0A669R1/ | A0A669R1/ | Serum amyloid A like 1   |
| LIELISHEK          | (S) | 1041.619 | A0A669R1/ | A0A669R1/ | Serum amyloid A like 1   |
| LIELK              | (R) | 658.425  | A0A120D7. | A0A120D7. | Putative serum amyloi    |
| LIINK              | (Y) | 634.392  | A0A315BD  | A0A315BD  | Serum amyloid a prote    |
| LLELK              | (A) | 614.46   | R5HKY8    | R5HKY8    | A( Serum amyloid A prote |
| LLELK              | (A) | 614.46   | R5HKY8    | R5HKY8    | Serum amyloid A prote    |
| LLLTCLSQPQMADIWVQR | (I) | 2140.158 | A0A4X2KG. | A0A4X2KG. | Serum amyloid A like 1   |
| LLLTCMSQTEVASVWVRR | (I) | 2131.169 | A0A0G2JUI | A0A0G2JUI | Similar to Serum amylc   |
| LLLTCSQSK          | (D) | 1075.618 | A0A1A7WC  | A0A1A7WC  | Serum amyloid A-like 1   |
| LLNLK              | (A) | 614.46   | R5HKY8    | R5HKY8    | Serum amyloid A prote    |
| LLNLK              | (A) | 614.46   | R5HKY8    | R5HKY8    | Serum amyloid A prote    |
| LLNLK              | (A) | 614.46   | R5HKY8    | R5HKY8    | Serum amyloid A prote    |
| LLNLK              | (A) | 614.46   | R5HKY8    | R5HKY8    | Serum amyloid A prote    |











|                  |     |          |            |            |                        |
|------------------|-----|----------|------------|------------|------------------------|
| VGWVR            | (S) | 648.329  | A0A1D5QY   | A0A1D5QY   | Serum amyloid A like 1 |
| VGWVR            | (S) | 648.329  | A0A1D5QY   | A0A1D5QY   | Serum amyloid A like 1 |
| VGWVR            | (S) | 648.329  | A0A1D5QY   | A0A1D5QY   | Serum amyloid A like 1 |
| VGWVR            | (S) | 648.329  | A0A1D5QY   | A0A1D5QY   | Serum amyloid A like 1 |
| VGWVR            | (S) | 648.329  | A0A1D5QY   | A0A1D5QY   | Serum amyloid A like 1 |
| VGWVR            | (S) | 648.329  | A0A1D5QY   | A0A1D5QY   | Serum amyloid A like 1 |
| VGWVR            | (S) | 648.329  | A0A1D5QY   | A0A1D5QY   | Serum amyloid A like 1 |
| VIADVR           | (E) | 688.399  | P22000     | P22000 Q2  | Serum amyloid A-2 pro  |
| VIADVR           | (E) | 688.399  | P22000     | P22000 Q2  | Serum amyloid A-2 pro  |
| VIADVR           | (E) | 688.399  | P22000     | P22000 Q2  | Serum amyloid A-2 pro  |
| VICDAREHSQR      | (V) | 1297.661 | A0A2Y9JNC  | A0A2Y9JNC  | Serum amyloid A prote  |
| VICDAREHSQR      | (V) | 1297.661 | A0A2Y9JNC  | A0A2Y9JNC  | Serum amyloid A prote  |
| VIIDGR           | (E) | 646.352  | A0A0S1YD:  | A0A0S1YD:  | Serum amyloid A prote  |
| VISAFR           | (E) | 705.371  | A0A131YN:  | A0A131YN:  | Serum amyloid A prote  |
| VISDAR           | (E) | 660.367  | P04918     | P04918 P1  | Serum amyloid A-3 pro  |
| VISDAR           | (E) | 660.367  | P04918     | P04918 P1  | Serum amyloid A-3 pro  |
| VISDAR           | (E) | 660.367  | P04918     | P04918 P1  | Serum amyloid A-3 pro  |
| VISDAR           | (E) | 660.367  | P04918     | P04918 P1  | Serum amyloid A-3 pro  |
| VISDAR           | (E) | 660.367  | P04918     | P04918 P1  | Serum amyloid A-3 pro  |
| VISDAR           | (E) | 660.367  | P04918     | P04918 P1  | Serum amyloid A-3 pro  |
| VISDAR           | (E) | 660.367  | P04918     | P04918 P1  | Serum amyloid A-3 pro  |
| VISDAREGFkr      | (I) | 1277.696 | P20726     | P20726 P2  | Serum amyloid A-1 pro  |
| VISDARESXR       | (V) | 1145.627 | A0A384BRI  | A0A384BRI  | Serum amyloid A prote  |
| VISDAREYIQK      | (L) | 1273.675 | A0A2K5CB:  | A0A2K5CB:  | Serum amyloid A prote  |
| VISDAREYIQK      | (L) | 1273.675 | A0A2K5CB:  | A0A2K5CB:  | Serum amyloid A prote  |
| VISDGR           | (E) | 646.352  | A0A671KLF  | A0A671KLF  | Serum amyloid A prote  |
| VISDGR           | (E) | 646.352  | A0A671KLF  | A0A671KLF  | Serum amyloid A prote  |
| VISDGR           | (E) | 646.352  | A0A671KLF  | A0A671KLF  | Serum amyloid A prote  |
| VISDGR           | (E) | 646.352  | A0A671KLF  | A0A671KLF  | Serum amyloid A prote  |
| VISDGREFVQGITQR  | (G) | 1689.928 | A0A498M3   | A0A498M3   | Serum amyloid A-5-like |
| VISFPEIGKR       | (G) | 1161.699 | A0A384BSF  | A0A384BSF  | Serum amyloid A prote  |
| VISLSKLVSCR      | (V) | 1233.698 | A0A452V4I  | A0A452V4I  | Serum amyloid A prote  |
| VISLSKLVSCR      | (V) | 1233.698 | A0A452V4I  | A0A452V4I  | Serum amyloid A prote  |
| VISLSKLVSCR      | (V) | 1233.698 | A0A452V4I  | A0A452V4I  | Serum amyloid A prote  |
| VISLSKLVSCR      | (V) | 1233.698 | A0A452V4I  | A0A452V4I  | Serum amyloid A prote  |
| VISLSKLVSCR      | (V) | 1233.698 | A0A452V4I  | A0A452V4I  | Serum amyloid A prote  |
| VISLSKLVSCR      | (V) | 1233.698 | A0A452V4I  | A0A452V4I  | Serum amyloid A prote  |
| VISLSKLVSCR      | (V) | 1233.698 | A0A452V4I  | A0A452V4I  | Serum amyloid A prote  |
| VISLSRLASCR      | (V) | 1233.698 | A0A452V4I  | A0A452V4I  | Serum amyloid A prote  |
| VISLSRLASCR      | (V) | 1233.698 | A0A452V4I  | A0A452V4I  | Serum amyloid A prote  |
| VISNAREGWQSRVSGR | (G) | 1732.872 | A0A6J2I0K: | A0A6J2I0K: | Serum amyloid A prote  |
| VISNARENWQSRVSGR | (G) | 1859.947 | U3K998     | U3K998     | Serum amyloid A prote  |
| VLADDLAK         | (S) | 902.483  | A0A1D5QY   | A0A1D5QY   | Serum amyloid A like 1 |
| VLAGDLEK         | (S) | 902.483  | A0A1D5QY   | A0A1D5QY   | Serum amyloid A like 1 |
| VLKEGQLSK        | (K) | 959.552  | A0A061I10  | A0A061I10  | Serum amyloid A prote  |
| VLSFPGPK         | (D) | 818.477  | A0A287AKI  | A0A287AKI  | Serum amyloid A prote  |
| VSGRGAEATR       | (A) | 1047.518 | A0A091KJC  | A0A091KJC  | Serum amyloid A prote  |
| VTDLFK           | (H) | 722.408  | Q2HXZ9     | Q2HXZ9 P1  | Serum amyloid A prote  |

|                     |     |          |                       |          |                        |
|---------------------|-----|----------|-----------------------|----------|------------------------|
| VTDLFK              | (H) | 722.408  | Q2HXZ9                | Q2HXZ9 P | Serum amyloid A prote  |
| VTDLFK              | (H) | 722.408  | Q2HXZ9                | Q2HXZ9 P | Serum amyloid A prote  |
| VTDLFK              | (H) | 722.408  | Q2HXZ9                | Q2HXZ9 P | Serum amyloid A prote  |
| VTDLFK              | (H) | 722.408  | Q2HXZ9                | Q2HXZ9 P | Serum amyloid A prote  |
| VTDLFK              | (H) | 722.408  | Q2HXZ9                | Q2HXZ9 P | Serum amyloid A prote  |
| VTDLFK              | (H) | 722.408  | Q2HXZ9                | Q2HXZ9 P | Serum amyloid A prote  |
| VTDLFK              | (H) | 722.408  | Q2HXZ9                | Q2HXZ9 P | Serum amyloid A prote  |
| VTDLFK              | (H) | 722.408  | Q2HXZ9                | Q2HXZ9 P | Serum amyloid A prote  |
| VTDLFK              | (H) | 722.408  | Q2HXZ9                | Q2HXZ9 P | Serum amyloid A prote  |
| VTDLFK              | (H) | 722.408  | Q2HXZ9                | Q2HXZ9 P | Serum amyloid A prote  |
| VTFDAR              | (E) | 648.331  | Q5XXU7                | Q5XXU7   | Serum amyloid A prote  |
| VTFDAR              | (E) | 648.331  | Q5XXU7                | Q5XXU7   | Serum amyloid A prote  |
| VTFDAR              | (E) | 648.331  | Q5XXU7                | Q5XXU7   | Serum amyloid A prote  |
| VTFDAR              | (E) | 648.331  | Q5XXU7                | Q5XXU7   | Serum amyloid A prote  |
| VTFDAR              | (E) | 648.331  | Q5XXU7                | Q5XXU7   | Serum amyloid A prote  |
| VTFDAR              | (E) | 648.331  | Q5XXU7                | Q5XXU7   | Serum amyloid A prote  |
| VTFDAR              | (E) | 648.331  | Q5XXU7                | Q5XXU7   | Serum amyloid A prote  |
| VTFDAR              | (G) | 648.331  | A0A6P5CU              | A0A6P5CU | Serum amyloid A prote  |
| VTFDAR              | (E) | 648.331  | Q5XXU7                | Q5XXU7   | Serum amyloid A prote  |
| VTFDAR              | (E) | 648.331  | Q5XXU7                | Q5XXU7   | Serum amyloid A prote  |
| VTFDAR              | (E) | 648.331  | Q5XXU7                | Q5XXU7   | Serum amyloid A prote  |
| VTFDAR              | (G) | 648.331  | A0A6P5CU              | A0A6P5CU | Serum amyloid A prote  |
| VTFDAR              | (E) | 648.331  | Q5XXU7                | Q5XXU7   | Serum amyloid A prote  |
| VTFDAR              | (E) | 648.331  | Q5XXU7                | Q5XXU7   | Serum amyloid A prote  |
| VTFDAR              | (E) | 648.331  | Q5XXU7                | Q5XXU7   | Serum amyloid A prote  |
| VTFDAR              | (E) | 648.331  | Q5XXU7                | Q5XXU7   | Serum amyloid A prote  |
| VTFDAR              | (G) | 648.331  | A0A6P5CU              | A0A6P5CU | Serum amyloid A prote  |
| VTFDAR              | (G) | 648.331  | A0A6P5CU              | A0A6P5CU | Serum amyloid A prote  |
| VTFDAR              | (E) | 648.331  | Q5XXU7                | Q5XXU7   | Serum amyloid A prote  |
| VTHLLK              | (F) | 688.424  | A0A2U3X5, A0A2U3X5,   |          | Serum amyloid A prote  |
| VVDLLLVRDQKCQ       | (-) | 1583.911 | A0A6G1RV, A0A6G1RV,   |          | Serum amyloid A like 1 |
| VVDLLLVRDQKCQ       | (-) | 1583.911 | A0A6G1RV, A0A6G1RV,   |          | Serum amyloid A like 1 |
| VVDLLLVRDQKCQ       | (-) | 1583.911 | A0A6G1RV, A0A6G1RV,   |          | Serum amyloid A like 1 |
| VVDLLLVRDQKCQ       | (-) | 1583.911 | A0A6G1RV, A0A6G1RV,   |          | Serum amyloid A like 1 |
| VVDLLLVRDQKCQ       | (-) | 1583.911 | A0A6G1RV, A0A6G1RV,   |          | Serum amyloid A like 1 |
| VVDLLLVRDQKCQ       | (-) | 1583.911 | A0A6G1RV, A0A6G1RV,   |          | Serum amyloid A like 1 |
| VVDLLLVRDQKCQ       | (-) | 1583.911 | A0A6G1RV, A0A6G1RV,   |          | Serum amyloid A like 1 |
| VVDLLLVRDQKCQ       | (-) | 1583.911 | A0A6G1RV, A0A6G1RV,   |          | Serum amyloid A like 1 |
| VVVANK              | (S) | 643.45   | A0A293M7, A0A293M7,   |          | Serum amyloid A prote  |
| VYRDAAGR            | (G) | 929.491  | A0A151MC, A0A151MC,   |          | Serum amyloid A prote  |
| WAAEISDGGREALQGLTR  | (H) | 1971.077 | A0A2I6QR2, A0A2I6QR2, |          | Serum amyloid A prote  |
| WIAEVISNAREWIQGMSVR | (G) | 2203.108 | A0A3Q3NIF, A0A3Q3NIF, |          | Serum amyloid A prote  |
| WIAEVISNAREWIQGMSVR | (G) | 2203.108 | A0A3Q3NIF, A0A3Q3NIF, |          | Serum amyloid A prote  |
| WIAEVISNAREWIQGMSVR | (G) | 2203.108 | A0A3Q3NIF, A0A3Q3NIF, |          | Serum amyloid A prote  |
| WIAEVISNAREWIQGMSVR | (G) | 2203.108 | A0A3Q3NIF, A0A3Q3NIF, |          | Serum amyloid A prote  |
| WIAEVISNAREWIQGMSVR | (G) | 2203.108 | A0A3Q3NIF, A0A3Q3NIF, |          | Serum amyloid A prote  |
| WIAEVISNAREWIQGMSVR | (G) | 2203.108 | A0A3Q3NIF, A0A3Q3NIF, |          | Serum amyloid A prote  |
| WIAEVISNAREWIQVMSGR | (G) | 2203.108 | A0A3Q3NIF, A0A3Q3NIF, |          | Serum amyloid A prote  |
| WIAEVISNAREWIQVMSGR | (G) | 2203.108 | A0A3Q3NIF, A0A3Q3NIF, |          | Serum amyloid A prote  |





ein

d a protein

d a protein

d a protein

d a protein

ein

ein

ein

ein containing protein

ein containing protein

ating factor SAF-5

ein











ein  
ein  
ein  
ein  
ein  
ein  
ein  
ein  
ein  
ein  
ein  
ein  
ein  
ein  
ein  
ein  
ein  
ein  
ein  
ein  
ein  
ein  
ein

ein  
ein

ein  
ein  
ein  
ein  
ein  
ein  
ein  
ein  
ein  
ein  
ein  
ein  
ein  
ein  
ein  
ein

stein  
stein

ein  
ein

ein (Fragment)  
ein (Fragment)

ein  
ein





d A protein

d A protein

ein

rotein 1

rotein 1

rotein 1 isoform 2

rotein 1

ein

.

oid A-3 protein precursor

.

oid A-3 protein precursor

.

.

.

.

.

ein

.

.

d a-activating factor saf-8 (Fragment)

ein

ein

.

.

.

.

d A protein

ein

ein

ein

.

oid A-3 protein precursor

.

ein

ein

ein

ein





ein (Fragment)

.

ein

ein

ein

oid A-3 protein precursor

.

ein

ein

ein

ein

ein

stein

ein

ein

ein

.

ein

ein

ein

ein

ein

ein

ein

ein



ein  
ein  
ein  
ein  
ein  
ein  
ein  
ein  
ein  
ein  
ein  
ein  
ein  
ein

protein 1

protein 1

.

ein  
ein  
ein  
ein  
ein

tein-like isoform X3

tein-like isoform X3

.

.

ein  
ein

.

.

.

.

.

.

.

.

.

.

.

tein

tein

tein

ein

ein

ein

ein

tein

tein

tein

tein

tein

tein

tein

tein

ein

ein

ein

ein

ein

ein

ein

tein isoform X1

tein

tein containing protein

tein

tein (Fragment)

tein

ein  
ein (Fragment)  
ein (Fragment)  
ein (Fragment)  
ein (Fragment)  
ein (Fragment)  
ein (Fragment)  
ein  
ein (Fragment)  
ein (Fragment)  
ein (Fragment)  
ein  
ein (Fragment)  
ein (Fragment)  
ein (Fragment)  
ein (Fragment)  
ein  
ein  
ein (Fragment)  
ein  
ein (Fragment)  
ein-like (Fragment)  
ein  
ein  
ein  
ein  
ein  
ein  
ein  
ein  
ein  
ein

ein (Fragment)

ein

ein
